# Supplementary material for: Alternative sulphur metabolism in the fungal pathogen Candida parapsilosis
Source: Research Square preprint supplement (doi:10.21203/rs.3.rs-3951443/v1), 2024-02-21
Supplement: Supplementary file 2 [file d8529d3a461d083ee6bf873b.xlsx]

## Sheet: CLIB214 deletion mutants
Table S1. List of strains and oligos used. TF: transcription factor; PK: protein kinase
In Grey: published in Holland et al., 2014, but not included in the library
Strain Name	ID in the library		CPAR ID (deletion)	Genotype	Reference
CLIB214	CLIB214				Type Strain
CPL2H1	2.1.1.5 (CPL2H1)			leu2::FRT/leu2::FRT, his1::FRT/his1::FRT	Holland et al., 2014
CPRI	CPRI			leu2::FRT/leu2::FRT, his1::FRT/his1::FRT, frt::CmLEU2/frt::CdHIS1	Holland et al., 2014
aaf1 Δ/Δ	cpar2_404190	TF	CPAR2_404190	leu2::FRT/leu2::FRT, his1::FRT/his1::FRT, aaf1::LEU2/aaf1::HIS1	Holland et al., 2014
ace2 Δ/Δ	cpar2_204370	TF	CPAR2_204370	leu2::FRT/leu2::FRT, his1::FRT/his1::FRT, ace2::LEU2/ace2::HIS1	Holland et al., 2014
ada2 Δ/Δ	cpar2_210550	TF	CPAR2_210550	leu2::FRT/leu2::FRT, his1::FRT/his1::FRT, ada2::LEU2/ada2::HIS1	Holland et al., 2014
bcr1 Δ/Δ	cpar2_205990	TF	CPAR2_205990	leu2::FRT/leu2::FRT, his1::FRT/his1::FRT, bcr1::LEU2/bcr1::HIS1	Holland et al., 2014
bre1 Δ/Δ	cpar2_304220	TF	CPAR2_304220	leu2::FRT/leu2::FRT, his1::FRT/his1::FRT, bre1::LEU2/bre1::HIS1	Holland et al., 2014
brg1 Δ/Δ	cpar2_107940	TF	CPAR2_107940	leu2::FRT/leu2::FRT, his1::FRT/his1::FRT, brg1::LEU2/brg1::HIS1	Holland et al., 2014
cap1 Δ/Δ	cpar2_405030	TF	CPAR2_405030	leu2::FRT/leu2::FRT, his1::FRT/his1::FRT, cap1::LEU2/cap1::HIS1	Holland et al., 2014
cas1 Δ/Δ	cpar2_804490	TF	CPAR2_804490	leu2::FRT/leu2::FRT, his1::FRT/his1::FRT, cas1::LEU2/cas1::HIS1	Holland et al., 2014
cas5 Δ/Δ	cpar2_400410	TF	CPAR2_400410	leu2::FRT/leu2::FRT, his1::FRT/his1::FRT, cas5::LEU2/cas5::HIS1	Holland et al., 2014
cat8 Δ/Δ	cpar2_207400	TF	CPAR2_207400	leu2::FRT/leu2::FRT, his1::FRT/his1::FRT, cat8::LEU2/cat8::HIS1	Holland et al., 2014
cph1 Δ/Δ	cpar2_208600	TF	CPAR2_208600	leu2::FRT/leu2::FRT, his1::FRT/his1::FRT, cph1::LEU2/cph1::HIS1	Holland et al., 2014
cph2 Δ/Δ	cpar2_603440	TF	CPAR2_603440	leu2::FRT/leu2::FRT, his1::FRT/his1::FRT, cph2::LEU2/cph2::HIS1	Holland et al., 2014
crz1 Δ/Δ	cpar2_807110	TF	CPAR2_807110	leu2::FRT/leu2::FRT, his1::FRT/his1::FRT, crz1::LEU2/crz1::HIS1	Holland et al., 2014
crz2 Δ/Δ	cpar2_203050	TF	CPAR2_203050	leu2::FRT/leu2::FRT, his1::FRT/his1::FRT, crz2::LEU2/crz2::HIS1	Holland et al., 2014
csr1 Δ/Δ	cpar2_403080	TF	CPAR2_403080	leu2::FRT/leu2::FRT, his1::FRT/his1::FRT, csr1::LEU2/csr1::HIS1	Holland et al., 2014
cta4 Δ/Δ	cpar2_405260	TF	CPAR2_405260	leu2::FRT/leu2::FRT, his1::FRT/his1::FRT, cta4::LEU2/cta4::HIS1	Holland et al., 2014
cup2 Δ/Δ	cpar2_201510	TF	CPAR2_201510	leu2::FRT/leu2::FRT, his1::FRT/his1::FRT, cup2::LEU2/cup2::HIS1	Holland et al., 2014
cup9 Δ/Δ	cpar2_301340	TF	CPAR2_301340	leu2::FRT/leu2::FRT, his1::FRT/his1::FRT, cup9::LEU2/cup9::HIS1	Holland et al., 2014
cwt1 Δ/Δ	cpar2_204560	TF	CPAR2_204560	leu2::FRT/leu2::FRT, his1::FRT/his1::FRT, cwt1::LEU2/cwt1::HIS1	Holland et al., 2014
czf1 Δ/Δ	cpar2_501290	TF	CPAR2_501290	leu2::FRT/leu2::FRT, his1::FRT/his1::FRT, czf1::LEU2/czf1::HIS1	Holland et al., 2014
efg1 Δ/Δ	cpar2_701620	TF	CPAR2_701620	leu2::FRT/leu2::FRT, his1::FRT/his1::FRT, efg1::LEU2/efg1::HIS1	Connolly et al 2013
efh1 Δ/Δ	cpar2_104660	TF	CPAR2_104660	leu2::FRT/leu2::FRT, his1::FRT/his1::FRT, efh1::LEU2/efh1::HIS1	Holland et al., 2014
fcr1 Δ/Δ	cpar2_808620	TF	CPAR2_808620	leu2::FRT/leu2::FRT, his1::FRT/his1::FRT, fcr1::LEU2/fcr1::HIS1	Holland et al., 2014
fcr3 Δ/Δ	cpar2_303540	TF	CPAR2_303540	leu2::FRT/leu2::FRT, his1::FRT/his1::FRT, fcr3::LEU2/fcr3::HIS1	Holland et al., 2014
fgr15 Δ/Δ	cpar2_213110	TF	CPAR2_213110	leu2::FRT/leu2::FRT, his1::FRT/his1::FRT, fgr15::LEU2/fgr15::HIS1	Holland et al., 2014
fgr27 Δ/Δ	cpar2_302880	TF	CPAR2_302880	leu2::FRT/leu2::FRT, his1::FRT/his1::FRT, fgr27::LEU2/fgr27::HIS1	Holland et al., 2014
flo8 Δ/Δ	cpar2_601080	TF	CPAR2_601080	leu2::FRT/leu2::FRT, his1::FRT/his1::FRT, flo8::LEU2/flo8::HIS1	Holland et al., 2014
gat1 Δ/Δ	cpar2_500590	TF	CPAR2_500590	leu2::FRT/leu2::FRT, his1::FRT/his1::FRT, gat1::LEU2/gat1::HIS1	Holland et al., 2014
gis2 Δ/Δ	cpar2_303450	TF	CPAR2_303450	leu2::FRT/leu2::FRT, his1::FRT/his1::FRT, gis2::LEU2/gis2::HIS1	Holland et al., 2014
gzf3 Δ/Δ	cpar2_800210	TF	CPAR2_800210	leu2::FRT/leu2::FRT, his1::FRT/his1::FRT, gzf3::LEU2/gzf3::HIS1	Holland et al., 2014
hal9 Δ/Δ	cpar2_303520	TF	CPAR2_303520	leu2::FRT/leu2::FRT, his1::FRT/his1::FRT, hal9::LEU2/hal9::HIS1	Holland et al., 2014
hap1/ Δ/Δ	cpar2_501640	TF	CPAR2_501640	leu2::FRT/leu2::FRT, his1::FRT/his1::FRT, hap1::LEU2/hap1::HIS1	Holland et al., 2014
hap2 Δ/Δ	cpar2_208290	TF	CPAR2_208290	leu2::FRT/leu2::FRT, his1::FRT/his1::FRT, hap2::LEU2/hap2::HIS1	Holland et al., 2014
hap3 Δ/Δ	cpar2_400930	TF	CPAR2_400930	leu2::FRT/leu2::FRT, his1::FRT/his1::FRT, hap3::LEU2/hap3::HIS1	Holland et al., 2014
hap31 Δ/Δ	cpar2_202040	TF	CPAR2_202040	leu2::FRT/leu2::FRT, his1::FRT/his1::FRT, hap31::LEU2/hap31::HIS1	Holland et al., 2014
hap43 Δ/Δ	cpar2_209090	TF	CPAR2_209090	leu2::FRT/leu2::FRT, his1::FRT/his1::FRT, hap43::LEU2/hap43::HIS1	Holland et al., 2014
hap5 Δ/Δ	cpar2_100540	TF	CPAR2_100540	leu2::FRT/leu2::FRT, his1::FRT/his1::FRT, hap5::LEU2/hap5::HIS1	Holland et al., 2014
isw2 Δ/Δ	cpar2_404600	TF	CPAR2_404600	leu2::FRT/leu2::FRT, his1::FRT/his1::FRT, isw2::LEU2/isw2::HIS1	Holland et al., 2014
kar4 Δ/Δ	cpar2_801280	TF	CPAR2_801280	leu2::FRT/leu2::FRT, his1::FRT/his1::FRT, kar4::LEU2/kar4::HIS1	Holland et al., 2014
leu3 Δ/Δ	cpar2_101730	TF	CPAR2_101730	leu2::FRT/leu2::FRT, his1::FRT/his1::FRT, leu3::LEU2/leu3::HIS1	Holland et al., 2014
mig1 Δ/Δ	cpar2_101340	TF	CPAR2_101340	leu2::FRT/leu2::FRT, his1::FRT/his1::FRT, mig1::LEU2/mig1::HIS1	Holland et al., 2014
mnl1 Δ/Δ	cpar2_204380	TF	CPAR2_204380	leu2::FRT/leu2::FRT, his1::FRT/his1::FRT, mnl1::LEU2/mnl1::HIS1	Holland et al., 2014
mrr1 Δ/Δ	cpar2_807270	TF	CPAR2_807270	leu2::FRT/leu2::FRT, his1::FRT/his1::FRT, mrr1::LEU2/mrr1::HIS1	Holland et al., 2014
ndt80 Δ/Δ	cpar2_213640	TF	CPAR2_213640	leu2::FRT/leu2::FRT, his1::FRT/his1::FRT, ndt80::LEU2/ndt80::HIS1	Holland et al., 2014
nrg1 Δ/Δ	cpar2_300790	TF	CPAR2_300790	leu2::FRT/leu2::FRT, his1::FRT/his1::FRT, nrg1::LEU2/nrg1::HIS1	Holland et al., 2014
opi1 Δ/Δ	cpar2_206390	TF	CPAR2_206390	leu2::FRT/leu2::FRT, his1::FRT/his1::FRT, opi1::LEU2/opi1::HIS1	Holland et al., 2014
rbf1 Δ/Δ	cpar2_600470	TF	CPAR2_600470	leu2::FRT/leu2::FRT, his1::FRT/his1::FRT, rbf1::LEU2/rbf1::HIS1	Holland et al., 2014
rfg1 Δ/Δ	cpar2_801100	TF	CPAR2_801100	leu2::FRT/leu2::FRT, his1::FRT/his1::FRT, rfg1::LEU2/rfg1::HIS1	Holland et al., 2014
rgt1 Δ/Δ	cpar2_400190	TF	CPAR2_400190	leu2::FRT/leu2::FRT, his1::FRT/his1::FRT, rgt1::LEU2/rgt1::HIS1	Holland et al., 2014
rim101 Δ/Δ	cpar2_700450	TF	CPAR2_700450	leu2::FRT/leu2::FRT, his1::FRT/his1::FRT, rim101::LEU2/rim101::HIS1	Holland et al., 2014
rme1 Δ/Δ	cpar2_212670	TF	CPAR2_212670	leu2::FRT/leu2::FRT, his1::FRT/his1::FRT, rme1::LEU2/rme1::HIS1	Holland et al., 2014
rpn4 Δ/Δ	cpar2_106900	TF	CPAR2_106900	leu2::FRT/leu2::FRT, his1::FRT/his1::FRT, rpn4::LEU2/rpn4::HIS1	Holland et al., 2014
sef1 Δ/Δ	cpar2_801430	TF	CPAR2_801430	leu2::FRT/leu2::FRT, his1::FRT/his1::FRT, sef1::LEU2/sef1::HIS1	Holland et al., 2014
sef2 Δ/Δ	cpar2_303270	TF	CPAR2_303270	leu2::FRT/leu2::FRT, his1::FRT/his1::FRT, sef2::LEU2/sef2::HIS1	Holland et al., 2014
sfl1 Δ/Δ	cpar2_205120	TF	CPAR2_205120	leu2::FRT/leu2::FRT, his1::FRT/his1::FRT, sfl1::LEU2/sfl1::HIS1	Holland et al., 2014
sfl2 Δ/Δ	cpar2_101060	TF	CPAR2_101060	leu2::FRT/leu2::FRT, his1::FRT/his1::FRT, sfl2::LEU2/sfl2::HIS1	Holland et al., 2014
sfu1 Δ/Δ	cpar2_700810	TF	CPAR2_700810	leu2::FRT/leu2::FRT, his1::FRT/his1::FRT, sfu1::LEU2/sfu1::HIS1	Holland et al., 2014
siz1 Δ/Δ	cpar2_109320	TF	CPAR2_109320	leu2::FRT/leu2::FRT, his1::FRT/his1::FRT, siz1::LEU2/siz1::HIS1	Holland et al., 2014
sko1 Δ/Δ	cpar2_110380	TF	CPAR2_110380	leu2::FRT/leu2::FRT, his1::FRT/his1::FRT, sko1::LEU2/sko1::HIS1	Holland et al., 2014
ssn6 Δ/Δ	cpar2_808810	TF	CPAR2_808810	leu2::FRT/leu2::FRT, his1::FRT/his1::FRT, ssn6::LEU2/ssn6::HIS1	Holland et al., 2014
stp4 Δ/Δ	cpar2_211740	TF	CPAR2_211740	leu2::FRT/leu2::FRT, his1::FRT/his1::FRT, stp4::LEU2/stp4::HIS1	Holland et al., 2014
suc1 Δ/Δ	cpar2_700130	TF	CPAR2_700130	leu2::FRT/leu2::FRT, his1::FRT/his1::FRT, suc1::LEU2/suc1::HIS1	Holland et al., 2014
tac1 Δ/Δ	cpar2_303510	TF	CPAR2_303510	leu2::FRT/leu2::FRT, his1::FRT/his1::FRT, tac1::LEU2/tac1::HIS1	Holland et al., 2014
tea1 Δ/Δ	cpar2_405770	TF	CPAR2_405770	leu2::FRT/leu2::FRT, his1::FRT/his1::FRT, tea1::LEU2/tea1::HIS1	Holland et al., 2014
tec1 Δ/Δ	cpar2_805930	TF	CPAR2_805930	leu2::FRT/leu2::FRT, his1::FRT/his1::FRT, tec1::LEU2/tec1::HIS1	Holland et al., 2014
tup1 Δ/Δ	cpar2_109520	TF	CPAR2_109520	leu2::FRT/leu2::FRT, his1::FRT/his1::FRT, tup1::LEU2/tup1::HIS1	Holland et al., 2014
ume6 Δ/Δ	cpar2_803820	TF	CPAR2_803820	leu2::FRT/leu2::FRT, his1::FRT/his1::FRT, ume6::LEU2/ume6::HIS1	Holland et al., 2014
upc2 Δ/Δ	cpar2_207280	TF	CPAR2_207280	leu2::FRT/leu2::FRT, his1::FRT/his1::FRT, upc2::LEU2/upc2::HIS1	Holland et al., 2014
war1 Δ/Δ	cpar2_110360	TF	CPAR2_110360	leu2::FRT/leu2::FRT, his1::FRT/his1::FRT, war1::LEU2/war1::HIS1	Holland et al., 2014
wor1 Δ/Δ	cpar2_805000	TF	CPAR2_805000	leu2::FRT/leu2::FRT, his1::FRT/his1::FRT, wor1::LEU2/wor1::HIS1	Holland et al., 2014
wor2 Δ/Δ	cpar2_405400	TF	CPAR2_405400	leu2::FRT/leu2::FRT, his1::FRT/his1::FRT, wor2::LEU2/wor2::HIS1	Holland et al., 2014
yox1 Δ/Δ	cpar2_300250	TF	CPAR2_300250	leu2::FRT/leu2::FRT, his1::FRT/his1::FRT, yox1::LEU2/yox1::HIS1	Holland et al., 2014
znc1 Δ/Δ	cpar2_303500	TF	CPAR2_303500	leu2::FRT/leu2::FRT, his1::FRT/his1::FRT, znc1::LEU2/znc1::HIS1	Holland et al., 2014
ckb1 Δ/Δ	cpar2_213480	PK	CPAR2_213480	leu2::FRT/leu2::FRT, his1::FRT/his1::FRT, ckb1::LEU2/ckb1::HIS1	Holland et al., 2014
ckb2 Δ/Δ	cpar2_501900	PK	CPAR2_501900	leu2::FRT/leu2::FRT, his1::FRT/his1::FRT, ckb2::LEU2/ckb2::HIS1	Holland et al., 2014
cla4 Δ/Δ	cpar2_804640	PK	CPAR2_804640	leu2::FRT/leu2::FRT, his1::FRT/his1::FRT, cla4::LEU2/cla4::HIS1	Holland et al., 2014
hst7 Δ/Δ	cpar2_202440	PK	CPAR2_202440	leu2::FRT/leu2::FRT, his1::FRT/his1::FRT, hst7::LEU2/hst7::HIS1	Holland et al., 2014
kin4 Δ/Δ	cpar2_801360	PK	CPAR2_801360	leu2::FRT/leu2::FRT, his1::FRT/his1::FRT, kin4::LEU2/kin4::HIS1	Holland et al., 2014
kis1 Δ/Δ	cpar2_806320	PK	CPAR2_806320	leu2::FRT/leu2::FRT, his1::FRT/his1::FRT, kis1::LEU2/kis1::HIS1	Holland et al., 2014
mkc1 Δ/Δ	cpar2_800090	PK	CPAR2_800090	leu2::FRT/leu2::FRT, his1::FRT/his1::FRT, mkc1::LEU2/mkc1::HIS1	Holland et al., 2014
mss2 Δ/Δ	cpar2_502710	PK	CPAR2_502710	leu2::FRT/leu2::FRT, his1::FRT/his1::FRT, mss2::LEU2/mss2::HIS1	Holland et al., 2014
sip3 Δ/Δ	cpar2_108820	PK	CPAR2_108820	leu2::FRT/leu2::FRT, his1::FRT/his1::FRT, sip3::LEU2/sip3::HIS1	Holland et al., 2014
ste11 Δ/Δ	cpar2_211250	PK	CPAR2_211250	leu2::FRT/leu2::FRT, his1::FRT/his1::FRT, ste11::LEU2/ste11::HIS1	Holland et al., 2014
swe1 Δ/Δ	cpar2_700800	PK	CPAR2_700800	leu2::FRT/leu2::FRT, his1::FRT/his1::FRT, swe1::LEU2/swe1::HIS1	Holland et al., 2014
tpk1 Δ/Δ	cpar2_804950	PK	CPAR2_804950	leu2::FRT/leu2::FRT, his1::FRT/his1::FRT, tpk1::LEU2/tpk1::HIS1	Holland et al., 2014
tpk2 Δ/Δ	cpar2_406480	PK	CPAR2_406480	leu2::FRT/leu2::FRT, his1::FRT/his1::FRT, tpk2::LEU2/tpk2::HIS1	Holland et al., 2014
vps34 Δ/Δ	cpar2_206880	PK	CPAR2_206880	leu2::FRT/leu2::FRT, his1::FRT/his1::FRT, vps34::LEU2/vps34::HIS1	Holland et al., 2014
yck2 Δ/Δ	cpar2_806980	PK	CPAR2_806980	leu2::FRT/leu2::FRT, his1::FRT/his1::FRT, yck2::LEU2/yck2::HIS1	Holland et al., 2014
yck3 Δ/Δ	cpar2_404320	PK	CPAR2_404320	leu2::FRT/leu2::FRT, his1::FRT/his1::FRT, yck3::LEU2/yck3::HIS1	Holland et al., 2014
cfem1-4 Δ/Δ	cpar2_402920	CFEM1	CPAR2_402920	leu2::FRT/leu2::FRT, his1::FRT/his1::FRT, cfem1-4::LEU2/cfem1-4::HIS1	Holland et al., 2014
	cpar2_402910	CFEM2	CPAR2_402910
	cpar2_402900	CFEM3	CPAR2_402900
	cpar2_402890	CFEM4	CPAR2_402890
cfem5,6 Δ/Δ	CF5+6 KO	CFEM5	CPAR2_300110	leu2::FRT/leu2::FRT, his1::FRT/his1::FRT, cfem5,6::LEU2/cfem5,6::HIS1	Holland et al., 2014
		CFEM6	CPAR2_300120
cfem7 Δ/Δ	cpar2_500080	CFEM7	CPAR2_500080	leu2::FRT/leu2::FRT, his1::FRT/his1::FRT, cfem7::LEU2/cfem7::HIS1	Holland et al., 2014
cpar2_404850 Δ/Δ	cpar2_404850		CPAR2_404850	leu2::FRT/leu2::FRT, his1::FRT/his1::FRT, CPAR2_404850::LEU2/CPAR2_404850::HIS1	Holland et al., 2014
cpar2_600640 Δ/Δ	cpar2_600640		CPAR2_600640	leu2::FRT/leu2::FRT, his1::FRT/his1::FRT, CPAR2_600640::LEU2/CPAR2_600640::HIS1	Holland et al., 2014
cpar2_703890 Δ/Δ	cpar2_703890		CPAR2_703890	leu2::FRT/leu2::FRT, his1::FRT/his1::FRT, CPAR2_703890::LEU2/CPAR2_703890::HIS1	Holland et al., 2014
cpar2_401970 Δ/Δ	cpar2_401970		CPAR2_401970	leu2::FRT/leu2::FRT, his1::FRT/his1::FRT, CPAR2_401970::LEU2/CPAR2_401970::HIS1	Holland et al., 2014
cpar2_704370 Δ/Δ	cpar2_704370		CPAR2_704370	leu2::FRT/leu2::FRT, his1::FRT/his1::FRT, CPAR2_704370::LEU2/CPAR2_704370::HIS1	Holland et al., 2014
cpar2_302900 Δ/Δ	cpar2_302900		CPAR2_302900	leu2::FRT/leu2::FRT, his1::FRT/his1::FRT, CPAR2_302900::LEU2/CPAR2_302900::HIS1	Holland et al., 2014
cpar2_800710 Δ/Δ	cpar2_800710		CPAR2_800710	leu2::FRT/leu2::FRT, his1::FRT/his1::FRT, CPAR2_800710::LEU2/CPAR2_800710::HIS1	Holland et al., 2014	The following oligos are consistent with the nomenclatue published in Holland et al, Plos Pathogens, 2014*
cth1Δ/Δ	cpar2_407950		CPAR2_407950	leu2::FRT/leu2::FRT, his1::FRT/his1::FRT, cth1::LEU2/cth1::HIS1	Holland et al., 2014	Primer 1	Primer 2 (universal)	Primer 3	Primer 5	Primer 4	Primer 6	5' Check-Fw	3' Check-Rv	ORF check-Rv
cpar2_109060 Δ/Δ	cpar2_109060	TF	CPAR2_109060	leu2::FRT/leu2::FRT, his1::FRT/his1::FRT, cpar2_109060::LEU2/cpar2_109060::HIS1	This study (Turner)	CCATACCCATACACATAGAA	cacggcgcgcctagcagcggGTATCCTGTTGTATTAAAAG	cacggcgcgcctagcagcggTATTGGTGATATGTGTGTAG	gcagggatgcggccgctgacATAGGCGGACCACCTCTAAGagctcggatccactagtaacg	gtcagcggccgcatccctgcTGAATGAAGAAAAAAAGAAG	GTGCAAGATCAAGATCAAGA	TTAGGTGGATATCTAATTTT	TCAAAAAATCGATTCGATAG	GGGTGTATGTCCTTCGTCGT
cpar2_401470 Δ/Δ	cpar2_401470	TF	CPAR2_401470	leu2::FRT/leu2::FRT, his1::FRT/his1::FRT, cpar2_401470::LEU2/cpar2_401470::HIS1	This study (Turner)	GTTAAACCAATTGTATTTCA	cacggcgcgcctagcagcggGTATCCTGTTGTATTAAAAG	ccgctgctaggcgcgccgtgACCAGTGTGATGGATATCTGC	gcagggatgcggccgctgacTATAGAAACGAAGCTCTGGCagctcggatccactagtaacg	gtcagcggccgcatccctgcAAGAGGGTGGATAAGAAGCA	ATTTGGATGATACGGGGTCC	ACCACACACACACACACACA	CTACCACACGATATATTCAA	GGTTGCAAAGGCGATGTTGT
cpar2_806570 Δ/Δ	cpar2_806570	TF	CPAR2_806570	leu2::FRT/leu2::FRT, his1::FRT/his1::FRT, cpar2_806570::LEU2/cpar2_806570::HIS1	This study (Turner)	TTCATTCACCTTCCAGAGCC	cacggcgcgcctagcagcggTTTATTAAATCTTAGTGTAA	ccgctgctaggcgcgccgtgACCAGTGTGATGGATATCTGC	gcagggatgcggccgctgacCCGAGTTAGGAATGTTATGCagctcggatccactagtaacg	gtcagcggccgcatccctgcTTATTTAGATGCTTTTGTTA	ACTTCCCAAAAAGAGAAGAT	TCTTGCCCTAAACCCAAATC	TATCTCCAGATACGAGCTCG	GCCCTTGATCTTCTTGCTGC
cpar2_406460 Δ/Δ	cpar2_406460	TF	CPAR2_406460	leu2::FRT/leu2::FRT, his1::FRT/his1::FRT, cpar2_406460::LEU2/cpar2_406460::HIS1	This study (Turner)	GTGGGAGAGTGAGTGGCGTC	cacggcgcgcctagcagcggTTGATCCTACGTCAAATAGT	ccgctgctaggcgcgccgtgACCAGTGTGATGGATATCTGC	gcagggatgcggccgctgacTGACGTGAGAGCTACTCGATagctcggatccactagtaacg	gtcagcggccgcatccctgcCGCACCCACCCAAGCAAACT	TATACGACACTGAGGATTTG	TCATTGCGTATTTGAAACGA	CCAGAGTACGGAATAAGCCA	ACTCGTCGTACTCTTTGGCG
cpar2_700880 Δ/Δ	cpar2_700880	TF	CPAR2_700880	leu2::FRT/leu2::FRT, his1::FRT/his1::FRT, cpar2_700880::LEU2/cpar2_700880::HIS1	This study (Turner)	GTGGTTGATTTGATCAAAGT	cacggcgcgcctagcagcggTTTTTGTTTTTGGCAGCACA	ccgctgctaggcgcgccgtgACCAGTGTGATGGATATCTGC	gcagggatgcggccgctgacGCTCATCTAACAGTATTGGCagctcggatccactagtaacg	gtcagcggccgcatccctgcAGCATAGAGAAAAAATAGGA	AGCGTATGTTTCTAGTCGTG	GTATCAGATTCGGTTTGCTC	AAAGTATTGGTCATTTACAA	ACGCAGCATCCTTCAACTCA
cpar2_803920 Δ/Δ	cpar2_803920	TF	CPAR2_803920	leu2::FRT/leu2::FRT, his1::FRT/his1::FRT, cpar2_803920::LEU2/cpar2_803920::HIS1	This study (Turner)	GGTGTACAATGGTAACATTG	cacggcgcgcctagcagcggTTTGCGAATGGATATAAATC	ccgctgctaggcgcgccgtgACCAGTGTGATGGATATCTGC	gcagggatgcggccgctgacCCAAATAAAGCATGGTCGCCagctcggatccactagtaacg	gtcagcggccgcatccctgcTAGTTTCAATCATCAATCAA	ACCCAATTTTTATCAAAGAT	TTGACAAAATATACGCCGAC	TATAATGGAGGTAAAGATTG	TGTTCCGGTCTTACCTGCAG
cpar2_406510 Δ/Δ	cpar2_406510	TF	CPAR2_406510	leu2::FRT/leu2::FRT, his1::FRT/his1::FRT, cpar2_406510::LEU2/cpar2_406510::HIS1	This study (Turner)	TCGCCTTACCAACCAGTTAC	cacggcgcgcctagcagcggTAGTCAAATGGACTTGATTT	ccgctgctaggcgcgccgtgACCAGTGTGATGGATATCTGC	gcagggatgcggccgctgacTGACTCAGTAGCATCGTTGGagctcggatccactagtaacg	gtcagcggccgcatccctgcTTACTAGAAATTAGGTTGTT	CAAAGAAAAACATATTGGAC	TCCCTTTGTCTTGTGAAATA	GGACATTGAAACCATGGTTA	TTGTTGCGTTGACTCTTGCG
cpar2_210620 Δ/Δ	cpar2_210620	TF	CPAR2_210620	leu2::FRT/leu2::FRT, his1::FRT/his1::FRT, cpar2_210620::LEU2/cpar2_210620::HIS1	This study (Turner)	ATTAGGAAATCATTTCATAA	cacggcgcgcctagcagcggTTTCCGTTTCTTACATGTAT	ccgctgctaggcgcgccgtgACCAGTGTGATGGATATCTGC	gcagggatgcggccgctgacGCAGCTTTCTGAATATCTGGagctcggatccactagtaacg	gtcagcggccgcatccctgcAGATGCAAAAAACACAGAAT	AACTAAGAAAGTACTCCAAT	GGTTTCAATCACATCTTAAC	CCCTATTAATATAAAATATA	ATGAAGGTCAGGCTTGGTCG
cpar2_704130 Δ/Δ	cpar2_704130	TF	CPAR2_704130	leu2::FRT/leu2::FRT, his1::FRT/his1::FRT, cpar2_704130::LEU2/cpar2_704130::HIS1	This study (Turner)	TAAAGCCATCAATTCTTATT	cacggcgcgcctagcagcggGACGTAAGCAAGGACTCAAT	ccgctgctaggcgcgccgtgACCAGTGTGATGGATATCTGC	gcagggatgcggccgctgacGGGATAGAGCACCATAACCCagctcggatccactagtaacg	gtcagcggccgcatccctgcGATGTTACTGTTTGTTTCTT	AAATAACAAATTACCAGCAA	ACTGCAAATCCTCTTTACAC	AAATTCTCACAACCTGAACT	CTTTTGGGGCCTGCTTTGAC
cpar2_400090 Δ/Δ	cpar2_400090	TF	CPAR2_400090	leu2::FRT/leu2::FRT, his1::FRT/his1::FRT, cpar2_400090::LEU2/cpar2_400090::HIS1	This study (Turner)	GTAATCCGCTTCCAATTTAT	cacggcgcgcctagcagcggTGTTTCGTTGCTACTTCTGT	ccgctgctaggcgcgccgtgACCAGTGTGATGGATATCTGC	gcagggatgcggccgctgacTAGACTCATGTCACACGCGGagctcggatccactagtaacg	gtcagcggccgcatccctgcCTATAAACAACAGTTGAAAA	ACGACCAATGTTTTCTGATT	TTGGCGCGATATCAGAGCTT	CCCCGGTCATGTTATTCTCT	AGCGAGTTGTACCTTTGCCA
cpar2_700900 Δ/Δ	cpar2_700900	TF	CPAR2_700900	leu2::FRT/leu2::FRT, his1::FRT/his1::FRT, cpar2_700900::LEU2/cpar2_700900::HIS1	This study (Turner)	TTACAATTGCTTGAAATATA	cacggcgcgcctagcagcggTTGGTAATTGGGGGTGAAGA	ccgctgctaggcgcgccgtgACCAGTGTGATGGATATCTGC	gcagggatgcggccgctgacGCTCATGTCAAACGACCGAAagctcggatccactagtaacg	gtcagcggccgcatccctgcATGTGAATAGACGAAGAAGT	TACCACTCTCTTCAAGGAAG	GTGGCCAGCACCACCGCCAC	AACAAGTTGAGATCTTCACC	GCTGGGCCAAGCAATTTCAA
cpar2_106250 Δ/Δ	cpar2_106250	TF	CPAR2_106250	leu2::FRT/leu2::FRT, his1::FRT/his1::FRT, cpar2_106250::LEU2/cpar2_106250::HIS1	This study (Turner)	TGTAGAATGTGATGGGGGTC	cacggcgcgcctagcagcggTGGGGGAGTTTGGTGAGATG	ccgctgctaggcgcgccgtgACCAGTGTGATGGATATCTGC	gcagggatgcggccgctgacAGCGTTGCTACACGGTATATagctcggatccactagtaacg	gtcagcggccgcatccctgcAGCTCTACATATATACATAT	GGTGGTGATGGCAGTCTCAG	CGCTGACGCTACAGTCTACT	AACCTACGTTCTTTACGACC	TTGGATGCAGGTGCTGGAAT
cpar2_501580 Δ/Δ	cpar2_501580	TF	CPAR2_501580	leu2::FRT/leu2::FRT, his1::FRT/his1::FRT, cpar2_501580::LEU2/cpar2_501580::HIS1	This study (Turner)	AGCCAATGCATAGCGATTAG	cacggcgcgcctagcagcggTTTGTTAGACTATTTTACTG	ccgctgctaggcgcgccgtgACCAGTGTGATGGATATCTGC	gcagggatgcggccgctgacGTATCTAACCTAAGCGACTCagctcggatccactagtaacg	gtcagcggccgcatccctgcTAAAAGACGGTTTGTTTTTT	ACTGGTTGCAGGTACTCACA	TGAAAATAGAAAAAAATTTT	AAACTCTAACTGAGCAAAAA	CAGCGTTATCTTGTTCGGCG
cpar2_203610 Δ/Δ	cpar2_203610	TF	CPAR2_203610	leu2::FRT/leu2::FRT, his1::FRT/his1::FRT, cpar2_203610::LEU2/cpar2_203610::HIS1	This study (Turner)	TTGAAAAAATGGAGAAGATG	cacggcgcgcctagcagcggTTTTTGAATATAACACTATT	ccgctgctaggcgcgccgtgACCAGTGTGATGGATATCTGC	gcagggatgcggccgctgacCTATCTTAGGCATGAGGATGagctcggatccactagtaacg	gtcagcggccgcatccctgcAAACTAGTTCAATGGGAGGG	TTCCGTGCTATCGAGGTTCT	CGAGGATTTGAACAAGGAAG	CCTCACATCAACCTCTGTAA	TGAACTTTGTGCTTGACGCG
cpar2_202390 Δ/Δ	cpar2_202390	TF	CPAR2_202390	leu2::FRT/leu2::FRT, his1::FRT/his1::FRT, cpar2_202390::LEU2/cpar2_202390::HIS1	This study (Turner)	GTTTGAAAAAGAGGGTGAAA	cacggcgcgcctagcagcggGGTTGAGAAGTTATCACGAG	ccgctgctaggcgcgccgtgACCAGTGTGATGGATATCTGC	gcagggatgcggccgctgacCGGGAAGATTTATGCAATGCagctcggatccactagtaacg	gtcagcggccgcatccctgcTGATGGTTTCACTTTGTAAA	TCATTAGTGGGAACAAAAAT	CAAAATTTCTTGATGTAATG	CTAATTTTCACCATTTTGGC	TGGATCAATGACACCGCTCA
cpar2_101530 Δ/Δ	cpar2_101530	TF	CPAR2_101530	leu2::FRT/leu2::FRT, his1::FRT/his1::FRT, cpar2_101530::LEU2/cpar2_101530::HIS1	This study (Turner)	AGGATTGTGTGTTGGGGTGG	cacggcgcgcctagcagcggTGATTGTCAAATTTGTTTGT	ccgctgctaggcgcgccgtgACCAGTGTGATGGATATCTGC	gcagggatgcggccgctgacACCCTACATGGGATGAAGAGagctcggatccactagtaacg	gtcagcggccgcatccctgcAGAGGTGGGGGGGGGGGGTT	GGAGCTCGAGCTAAAGGTTT	GTCAACACAACTCAAAAGAA	TACAATCACGGATATAATCA	ATGTGGTATCGTCGTGGTGG
cpar2_501570 Δ/Δ	cpar2_501570	TF	CPAR2_501570	leu2::FRT/leu2::FRT, his1::FRT/his1::FRT, cpar2_501570::LEU2/cpar2_501570::HIS1	This study (Turner)	GCACTACATTTATGTCATTT	cacggcgcgcctagcagcggTGTTTCTGGTGGAGGGGAGG	ccgctgctaggcgcgccgtgACCAGTGTGATGGATATCTGC	gcagggatgcggccgctgacGTATCGTAAACATGCGTGGAagctcggatccactagtaacg	gtcagcggccgcatccctgcAGTTGCGGGTATAGTCGTGT	ATGGTACTAAATTTACTTCT	AATATGATTGAATTTTTCAC	TGCTGCCATGAAGGAAGAGA	GCTCTGGGCAGGATCCTTTT
cpar2_207490 Δ/Δ	cpar2_207490	TF	CPAR2_207490	leu2::FRT/leu2::FRT, his1::FRT/his1::FRT, cpar2_207490::LEU2/cpar2_207490::HIS1	This study (Turner)	TGGAGTCAAGAACGAAATAC	cacggcgcgcctagcagcggTATAGTGGTGTCGTGCTGTA	ccgctgctaggcgcgccgtgACCAGTGTGATGGATATCTGC	gcagggatgcggccgctgacGAGCCGTCTATTCACCTGTTagctcggatccactagtaacg	gtcagcggccgcatccctgcATGTGCAACATGTTTTTGAG	ACTGGCTCACCTTTAATAGC	AATGCATATAGTTTTACAAA	CATGAAACCTGAAAACATCA	TGGCCACCTATCTGTTGCTG
cpar2_802440 Δ/Δ	cpar2_802440	TF	CPAR2_802440	leu2::FRT/leu2::FRT, his1::FRT/his1::FRT, cpar2_802440::LEU2/cpar2_802440::HIS1	This study (Turner)	TTTTAAAGTGCTCTCTTGTC	cacggcgcgcctagcagcggTGTGAATTATAATGTGGAAT	ccgctgctaggcgcgccgtgACCAGTGTGATGGATATCTGC	gcagggatgcggccgctgacCATAGTGGACAAGTACGTGAagctcggatccactagtaacg	gtcagcggccgcatccctgcAGAGTGAGCCAAAGGTTGGG	GTTGCGATGTGGAGGTAGGT	GAAGTAACCGTAGCCTTTCC	GTGATTATGTACAAGTTTGA	TAGGAGGACCCGATTGCTCA
cpar2_203540 Δ/Δ	cpar2_203540	TF	CPAR2_203540	leu2::FRT/leu2::FRT, his1::FRT/his1::FRT, cpar2_203540::LEU2/cpar2_203540::HIS1	This study (Turner)	TTTGTCTCCTATTTTTTTCG	cacggcgcgcctagcagcggGATTGCAAAAGGATTCGTGG	ccgctgctaggcgcgccgtgACCAGTGTGATGGATATCTGC	gcagggatgcggccgctgacCTATCACGGGTCAGGAGTCTagctcggatccactagtaacg	gtcagcggccgcatccctgcGAGGTGTTACACCACGAAAG	GAAGAATCACCAAAATTGAT	TAACGGACAATTAATGTCTT	AAAACGGCAAACATTTCGGG	CTGTGCTTGTTGTGGTGGTG
cpar2_502960 Δ/Δ	cpar2_502960	TF	CPAR2_502960	leu2::FRT/leu2::FRT, his1::FRT/his1::FRT, cpar2_502960::LEU2/cpar2_502960::HIS1	This study (Turner)	TTTTTGTAGTGGTGGTGAAG	cacggcgcgcctagcagcggTTTTAGAACATTGAGATAAA	ccgctgctaggcgcgccgtgACCAGTGTGATGGATATCTGC	gcagggatgcggccgctgacTAATGAGCCAGACGACGGTCagctcggatccactagtaacg	gtcagcggccgcatccctgcACACTTTGATAGACGTATAA	AAATGAGTGTCAATGAGGAT	TTTACGTTATTTCAACGTGT	AGAATTATAGTTGGCAAATA	CGCCATTGCTGTAAAGCAGG
cpar2_208790 Δ/Δ	cpar2_208790	TF	CPAR2_208790	leu2::FRT/leu2::FRT, his1::FRT/his1::FRT, cpar2_208790::LEU2/cpar2_208790::HIS1	This study (Turner)	GTAAGTACATTATCTGTTCT	cacggcgcgcctagcagcggTGCTCTTTCAAGTGATTGAA	ccgctgctaggcgcgccgtgACCAGTGTGATGGATATCTGC	gcagggatgcggccgctgacGATATTGATCTCACCTGCCTagctcggatccactagtaacg	gtcagcggccgcatccctgcAATGAATAAGGGCTATACTT	ATAATACTAACTCCTTACTA	TATTCTTGTTCAGGAAACTT	AATCTCGCTTACAAACTGGT	GATGAGTCAAACGTGGGTGC
cpar2_807820 Δ/Δ	cpar2_807820	TF	CPAR2_807820	leu2::FRT/leu2::FRT, his1::FRT/his1::FRT, cpar2_807820::LEU2/cpar2_807820::HIS1	This study (Turner)	CAAGCTCGTTGGTAAGAACT	cacggcgcgcctagcagcggTTCTACCCAAGATCCAACTT	ccgctgctaggcgcgccgtgACCAGTGTGATGGATATCTGC	gcagggatgcggccgctgacCCGTCGTATAAATGAGAGCAagctcggatccactagtaacg	gtcagcggccgcatccctgcAAAAAAAAATTCTATTGCCT	ACCTTTCAGACAAGGTTAGC	AGTCTTGTAGTTTTTTGGTT	GATGATAGGACTCCATTGTT	ATTCTGCTCAATGCTGCCCT
cpar2_110110 Δ/Δ	cpar2_110110	TF	CPAR2_110110	leu2::FRT/leu2::FRT, his1::FRT/his1::FRT, cpar2_110110::LEU2/cpar2_110110::HIS1	This study (Turner)	TGAAGTCCAACGCCAAAAAG	cacggcgcgcctagcagcggTTTTCAAAAAATTCAATCTA	ccgctgctaggcgcgccgtgACCAGTGTGATGGATATCTGC	gcagggatgcggccgctgacATCAGGCGGTCGAAGCATTCagctcggatccactagtaacg	gtcagcggccgcatccctgcATTGAAATTTAGCATTTATT	TATACCAAAGAGTTGGATGC	TTCAATCAATTCATCCACTA	GCTTGACAAGGAGGAAAATG	ACTTGACACCCAACGCTCTT
cpar2_800080 Δ/Δ	cpar2_800080	TF	CPAR2_800080	leu2::FRT/leu2::FRT, his1::FRT/his1::FRT, cpar2_800080::LEU2/cpar2_800080::HIS1	This study (Turner)	GGTGATAGAAACCATTGTCT	cacggcgcgcctagcagcggCGTTTTGAGGTTTTATTGTT	ccgctgctaggcgcgccgtgACCAGTGTGATGGATATCTGC	gcagggatgcggccgctgacCACGATAGGAAATGCGTCCAagctcggatccactagtaacg	gtcagcggccgcatccctgcATTTATGATACGATTGGTAA	ATAAGCCAGAGCGGCATCAC	GTCAACCACTTTATCTGCCA	CCATGTTTGAAGTTGTCTTG	GTTGCTCCCGAGGGTGTTAG
cpar2_103550 Δ/Δ	cpar2_103550	TF	CPAR2_103550	leu2::FRT/leu2::FRT, his1::FRT/his1::FRT, cpar2_103550::LEU2/cpar2_103550::HIS1	This study (Turner)	GTTATAAAGGAACCTTCATG	cacggcgcgcctagcagcggAGCTCTTTATGACAATGTGG	ccgctgctaggcgcgccgtgACCAGTGTGATGGATATCTGC	gcagggatgcggccgctgacACTCTAAGGAGATATGAGGCagctcggatccactagtaacg	gtcagcggccgcatccctgcAAGATCACGTTAAGTGAATA	ATCGGAAATTGAAGCTCATG	CCGTTATTGCTCAATTTTTA	CGCAACGATTATCATCTACT	TCCAGAGCAATCACGGCAAT
cpar2_807260 Δ/Δ	cpar2_807260	TF	CPAR2_807260	leu2::FRT/leu2::FRT, his1::FRT/his1::FRT, cpar2_807260::LEU2/cpar2_807260::HIS1	This study (Turner)	GTATGGAACTATCAGGAACT	cacggcgcgcctagcagcggATCTTGATTCTAGCGTGGCG	ccgctgctaggcgcgccgtgACCAGTGTGATGGATATCTGC	gcagggatgcggccgctgacCCGGACCTGTAACTTATTAGagctcggatccactagtaacg	gtcagcggccgcatccctgcAGTAAGAGCTTGACTTGTAA	CTCTTTTTACAATTTGTACA	TAACCTACGTTATTTCCATT	TGTGTTGCCTCTCTTCCTAC	TGAATCTGAGGCGCACCAAT
cpar2_806500 Δ/Δ	cpar2_806500	TF	CPAR2_806500	leu2::FRT/leu2::FRT, his1::FRT/his1::FRT, cpar2_806500::LEU2/cpar2_806500::HIS1	This study (Turner)	GCCAAAATCGTTTATAAAAA	cacggcgcgcctagcagcggATCTTTTCTTCAAGATTGGA	ccgctgctaggcgcgccgtgACCAGTGTGATGGATATCTGC	gcagggatgcggccgctgacCCGAGCTACGGATATTTGATagctcggatccactagtaacg	gtcagcggccgcatccctgcATAGCAGATCTCTAATTGTG	TTCTGGTTTCCTTTCTCCAA	AATTATCACAAAATAGAACG	AGTAATAGTGACGAAAAAGT	GGCTGTTGTTGTTGCTGGAG
cpar2_800890 Δ/Δ	cpar2_800890	TF	CPAR2_800890	leu2::FRT/leu2::FRT, his1::FRT/his1::FRT, cpar2_800890::LEU2/cpar2_800890::HIS1	This study (Turner)	TCTGTCGTTGATGATTTGGT	cacggcgcgcctagcagcggTTGGAATTTAGTCTAAACCC	ccgctgctaggcgcgccgtgACCAGTGTGATGGATATCTGC	gcagggatgcggccgctgacCAGACTCTATCATGGTGTTGagctcggatccactagtaacg	gtcagcggccgcatccctgcATTAGAAGAATCTGTAACAC	CTCGTGTACATGATCCTGAA	CTATTTGGGGGTTACTACTA	TAAAGTCGCCGGTAGTAGCT	TTGGTCTTTCGTCTTCGGCA
cpar2_102740 Δ/Δ	cpar2_102740	TF	CPAR2_102740	leu2::FRT/leu2::FRT, his1::FRT/his1::FRT, cpar2_102740::LEU2/cpar2_1027400::HIS1	This study (Turner)	AGCCACACGGTGAAAACATT	cacggcgcgcctagcagcggTTTTTGATAATTGAATGTCA	ccgctgctaggcgcgccgtgACCAGTGTGATGGATATCTGC	gcagggatgcggccgctgacACGGCATACACCGAGTCAAGagctcggatccactagtaacg	gtcagcggccgcatccctgcCTTTGGTAAGTTTTGGACTG	TGCTATATAGCAGATTTTTG	GAGGAAGACTGCTATTTGAT	TCATTGCTAGTTAGAAACTG	TCATTCTAGGGATGGGGGCA
cpar2_204990 Δ/Δ	cpar2_204990	TF	CPAR2_204990	leu2::FRT/leu2::FRT, his1::FRT/his1::FRT, cpar2_204990::LEU2/cpar2_204990::HIS1	This study (Turner)	TTGATTTGATCTGCTAATTT	cacggcgcgcctagcagcggATAATCATCAGCTTTTTGGG	ccgctgctaggcgcgccgtgACCAGTGTGATGGATATCTGC	gcagggatgcggccgctgacCTTATAGGGTGCTACAGTTGagctcggatccactagtaacg	gtcagcggccgcatccctgcGTGGAGCGTATTATAAAGAA	ACTTTTATTGATGGAAACAA	TACGTAAATATTTATCTTTA	TCGTAGAATTCCCGCTTACA	TAATGGTGGTTGAGGTGGCC
cpar2_211900 Δ/Δ	cpar2_211900	TF	CPAR2_211900	leu2::FRT/leu2::FRT, his1::FRT/his1::FRT, cpar2_211900::LEU2/cpar2_211900::HIS1	This study (Turner)	CCATTTTGTTGTTAGTGAAG	cacggcgcgcctagcagcggGAAAAGAATAAAGTTTAGCT	ccgctgctaggcgcgccgtgACCAGTGTGATGGATATCTGC	gcagggatgcggccgctgacGCCCACGAGCAATTTATTCAagctcggatccactagtaacg	gtcagcggccgcatccctgcATAAAGACAGGTTCGAAGCA	ACCCGATCTCATCAAAATAT	TTGTGTTGTTTCTGGTTGTT	CAAGTATCTTGTTAGGGTCA	CACACGCATTTCCTGGCTTC
cpar2_109790 Δ/Δ	cpar2_109790	TF	CPAR2_109790	leu2::FRT/leu2::FRT, his1::FRT/his1::FRT, cpar2_109790::LEU2/cpar2_109790::HIS1	This study (Turner)	AAAACATCCAATCGGAAAAA	cacggcgcgcctagcagcggGGTGAAACACAATCAATAAT	ccgctgctaggcgcgccgtgACCAGTGTGATGGATATCTGC	gcagggatgcggccgctgacATATTCCTTGACAGGCCGGGagctcggatccactagtaacg	gtcagcggccgcatccctgcAGTTGGAGTTGGAGTTGGAG	ACTGGCCAATTCAATTTGAA	AAGAAGGTACAGTAAGTAGT	AAAACCAACGAAGCTCACCA	ATCACGAATATCCCCCACGC
cpar2_800040 Δ/Δ	cpar2_800040	TF	CPAR2_800040	leu2::FRT/leu2::FRT, his1::FRT/his1::FRT, cpar2_800040::LEU2/cpar2_800040::HIS1	This study (Turner)	TCGCTGGCATGATTGTAATG	cacggcgcgcctagcagcggCACTGTCGATGCTTGTTGAT	ccgctgctaggcgcgccgtgACCAGTGTGATGGATATCTGC	gcagggatgcggccgctgacCACGAGGCATAGACGCTAAGagctcggatccactagtaacg	gtcagcggccgcatccctgcATGAAAAAGAGTATAGAAAT	TGCCGGAACAGTACATGGAG	TTCTTTTTCAAAGCTAAATA	CAATTCTACAACAACTATTG	GAGGACCAATATCGGGCAGG
cpar2_804160 Δ/Δ	cpar2_804160	TF	CPAR2_804160	leu2::FRT/leu2::FRT, his1::FRT/his1::FRT, cpar2_804160::LEU2/cpar2_804160::HIS1	This study (Turner)	CCTGCAATACTCCAAACGAA	cacggcgcgcctagcagcggTATTAAGTTAAGGTAGAACT	ccgctgctaggcgcgccgtgACCAGTGTGATGGATATCTGC	gcagggatgcggccgctgacCCACTATCAGCGATGGGAAGagctcggatccactagtaacg	gtcagcggccgcatccctgcACAGATAGTTTTTATAGGAG	TACATTGGCAAGTTAGAATC	ATATAACTTGTGAAAAATGT	AAGGTGAGAATTTTTTTACA	GATTGTATTGCGGCGGTGAG
cpar2_402210 Δ/Δ	cpar2_402210	TF	CPAR2_402210	leu2::FRT/leu2::FRT, his1::FRT/his1::FRT, cpar2_402210::LEU2/cpar2_402210::HIS1	This study (Turner)	CGCTCTCGTCGCCTTTCGCT	cacggcgcgcctagcagcggATTGAATCAAATAAATCTTC	ccgctgctaggcgcgccgtgACCAGTGTGATGGATATCTGC	gcagggatgcggccgctgacTATCTCTGAGGACGTGCCTGagctcggatccactagtaacg	gtcagcggccgcatccctgcTAATTTTCGTAAGTTGTATA	GAAGTAGCATTAAATAATCT	CCACATCCTAAAACAGTAAT	ATCTTGACATAAAAGTGCAC	TCTTCGGGCTCACATGATCG
cpar2_802840 Δ/Δ	cpar2_802840	TF	CPAR2_802840	leu2::FRT/leu2::FRT, his1::FRT/his1::FRT, cpar2_802840::LEU2/cpar2_802840::HIS1	This study (Turner)	GAAGACGAACGTCTCGTACT	cacggcgcgcctagcagcggCGTGATATTTTTTTTAGATC	ccgctgctaggcgcgccgtgACCAGTGTGATGGATATCTGC	gcagggatgcggccgctgacCATCGAGTATAAGGATCGTCagctcggatccactagtaacg	gtcagcggccgcatccctgcAATTAGATGCAGTCTATACA	TGAATCACTAGACGAAGCCG	GATACTTGTATTGCATTGCG	CACTCTGTGAAAATCGCAAA	TTTCTGATTCCGGTGAGCCC
cpar2_401920 Δ/Δ	cpar2_401920	TF	CPAR2_401920	leu2::FRT/leu2::FRT, his1::FRT/his1::FRT, cpar2_401920::LEU2/cpar2_401920::HIS1	This study (Turner)	GATGCCCTCGGCAAATTTCA	cacggcgcgcctagcagcggGTTCAATCCCTATTACGTTA	ccgctgctaggcgcgccgtgACCAGTGTGATGGATATCTGC	gcagggatgcggccgctgacTATCATAGGCCATACCGGCGagctcggatccactagtaacg	gtcagcggccgcatccctgcGATTGTGACACCAACAAAGT	TGATATTACTTCTATTTCAT	CCATCAAGTAGTTCAATCCC	TATTGAAAGAGGAATTGCCC	TCACCACGGCCTGAATAGTC
cpar2_405470 Δ/Δ	cpar2_405470	TF	CPAR2_405470	leu2::FRT/leu2::FRT, his1::FRT/his1::FRT, cpar2_405470::LEU2/cpar2_405470::HIS1	This study (Turner)	TATGGTCTAAATACATAAAG	cacggcgcgcctagcagcggCATTAATAAAAATAGTTTAA	ccgctgctaggcgcgccgtgACCAGTGTGATGGATATCTGC	gcagggatgcggccgctgacTCGGACGTGCAACGAGAAACagctcggatccactagtaacg	gtcagcggccgcatccctgcTCACCTATGTTCTATATGTA	GCGGAACGGTCCGAGCAATT	ATGGAACTTTCTTCTGCTTC	GTGGAGTACTTGTGTGTGGG	TCCATTCGACGTGGGTGAAG
cpar2_602060 Δ/Δ	cpar2_602060	TF	CPAR2_602060	leu2::FRT/leu2::FRT, his1::FRT/his1::FRT, cpar2_602060::LEU2/cpar2_602060::HIS1	This study (Turner)	GAAGGTTTGCATTCAGTCGG	cacggcgcgcctagcagcggTGGTAGGTCCAAAATCTACT	ccgctgctaggcgcgccgtgACCAGTGTGATGGATATCTGC	gcagggatgcggccgctgacAAGTACAGTTTAGACCAGGGagctcggatccactagtaacg	gtcagcggccgcatccctgcCTGAGCTTCGACTACTGTAG	ACTCATTCTATTCAAAGCAA	TGTTAATTTCTGGTCAAAGG	CACGCTGTTGTAGATCTCTG	TGTAACAGCCGCATCCGAAA
cpar2_806000 Δ/Δ	cpar2_806000	TF	CPAR2_806000	leu2::FRT/leu2::FRT, his1::FRT/his1::FRT, cpar2_806000::LEU2/cpar2_806000::HIS1	This study (Turner)	AAATGAGACAATCTCTTCTG	cacggcgcgcctagcagcggATCATCGGTTCAAGTAAGCA	ccgctgctaggcgcgccgtgACCAGTGTGATGGATATCTGC	gcagggatgcggccgctgacCCCTATATGTGTAAGGCGCGagctcggatccactagtaacg	gtcagcggccgcatccctgcCGGGGATACTACGTACAAAA	GTTATTGTTCTTATTACTTT	GGTACATGCCATTTGATTGT	ATATCGTTTAAACTTGGATA	GTCAAAGCACCTTTCACGCC
cpar2_702260 Δ/Δ	cpar2_702260	TF	CPAR2_702260	leu2::FRT/leu2::FRT, his1::FRT/his1::FRT, cpar2_702260::LEU2/cpar2_702260::HIS1	This study (Turner)	TCATGGCTTGTTACTATTCA	cacggcgcgcctagcagcggTTCTTAAGTAGTGGATGTTG	ccgctgctaggcgcgccgtgACCAGTGTGATGGATATCTGC	gcagggatgcggccgctgacGGATCATTACCATTCCCGAGagctcggatccactagtaacg	gtcagcggccgcatccctgcAAAGGATGAGGGTTTTTTAA	TTTTGACCATGAAAACAATG	GTAAGAGAAGCAACAGCAAA	TATAAGTATAAAGATGAAAT	TGCTGCCACTTTTTCTTCCA
cpar2_103120 Δ/Δ	cpar2_103120	TF	CPAR2_103120	leu2::FRT/leu2::FRT, his1::FRT/his1::FRT, cpar2_103120::LEU2/cpar2_103120::HIS1	This study (Turner)	TTATTATTTACTAGCCGTCG	cacggcgcgcctagcagcggAATTGACAGTCGTGGTGTAC	ccgctgctaggcgcgccgtgACCAGTGTGATGGATATCTGC	gcagggatgcggccgctgacACTACGTTGGTGAATTAGCGagctcggatccactagtaacg	gtcagcggccgcatccctgcCTCATGAGTCTTATAGTGAT	ATTAGAAGGATACCCACAAC	AGTCACTCTGCAAATATTAA	CTATTGCTATATGTGCTGGA	ACGTAATGTGCGAGATGGGG
cpar2_200790 Δ/Δ	cpar2_200790	TF	CPAR2_200790	leu2::FRT/leu2::FRT, his1::FRT/his1::FRT, cpar2_200790::LEU2/cpar2_200790::HIS1	This study (Turner)	TACCTAGAAGTATTCACGGA	cacggcgcgcctagcagcggCAATTTGGACAAAAACTATC	ccgctgctaggcgcgccgtgACCAGTGTGATGGATATCTGC	gcagggatgcggccgctgacCGACTATTGTGACATACCTGagctcggatccactagtaacg	gtcagcggccgcatccctgcACAGTATATGATATATAGAT	CCCAAGTTTTTATCCGATAC	TTGCCAAAAATCACAAAAGG	TGCAATAGCCTGGATAATAT	ATTGCCAGTTGTACTCCGCA
cpar2_204950 Δ/Δ	cpar2_204950	TF	CPAR2_204950	leu2::FRT/leu2::FRT, his1::FRT/his1::FRT, cpar2_204950::LEU2/cpar2_204950::HIS1	This study (Turner)	AAGTGGTAAATGCTCGACCT	cacggcgcgcctagcagcggAGAGAAGGAGTTATGTGGGG	ccgctgctaggcgcgccgtgACCAGTGTGATGGATATCTGC	gcagggatgcggccgctgacCTTACTGTAGGAGAGAGACTagctcggatccactagtaacg	gtcagcggccgcatccctgcCTATACTACTTTAGATGCCC	AAAGTCAATCGTCGTCAGTT	TAACATAGCCCGGTATAAAT	CATTCTTACCCAGTTGGAAG	TCCTTGACCAATTGCTCCGT
cpar2_801450 Δ/Δ	cpar2_801450	TF	CPAR2_801450	leu2::FRT/leu2::FRT, his1::FRT/his1::FRT, cpar2_801450::LEU2/cpar2_801450::HIS1	This study (Turner)	AAAGCAATCTGATTATATGC	cacggcgcgcctagcagcggGTTTCTATGGTAATTTGTGT	ccgctgctaggcgcgccgtgACCAGTGTGATGGATATCTGC	gcagggatgcggccgctgacCAGCGATGACTATATCTGAGagctcggatccactagtaacg	gtcagcggccgcatccctgcGAACTGAAATAAGCACATTT	TACAACGATATCATACGACA	CATCAGCAAATTTCAAGATA	CTAGAGCCAACTGTACTGAG	TTGCAGCTGTTGTTGTGGTG
cpar2_302310 Δ/Δ	cpar2_302310	TF	CPAR2_302310	leu2::FRT/leu2::FRT, his1::FRT/his1::FRT, cpar2_302310::LEU2/cpar2_302310::HIS1	This study (Turner)	AGATGGAAGCTTGCTTACAG	cacggcgcgcctagcagcggCTCCCTATAGTAATCTATAT	ccgctgctaggcgcgccgtgACCAGTGTGATGGATATCTGC	gcagggatgcggccgctgacATTCAGCTCAGTCTGCACATagctcggatccactagtaacg	gtcagcggccgcatccctgcGCGGTGCTTGGGTGTTTCAT	GTGGCAATCACCTTCGATTG	ACGAGTATCTTGAAAATTTG	TTGTTCGTCTTTGGTCAATG	TTTCCGCGTCATGTCCTTGA
cpar2_402070 Δ/Δ	cpar2_402070	TF	CPAR2_402070	leu2::FRT/leu2::FRT, his1::FRT/his1::FRT, cpar2_402070::LEU2/cpar2_402070::HIS1	This study (Turner)	TTAGCAATTTTTACTAGTAA	cacggcgcgcctagcagcggATGTGTGTCTATTGTGGCTA	ccgctgctaggcgcgccgtgACCAGTGTGATGGATATCTGC	gcagggatgcggccgctgacTATCGCTGAGCAGTCTCTGGagctcggatccactagtaacg	gtcagcggccgcatccctgcTATAATTACCAGTGATGATG	GTGTTTATTCACTAAAAAAT	ATTACAATGCAAGGGAGTGG	ATTAAAGGCTGGGGGATGCT	GATGGTGCAGCTGCTACGTA
cpar2_802880 Δ/Δ	cpar2_802880	TF	CPAR2_802880	leu2::FRT/leu2::FRT, his1::FRT/his1::FRT, cpar2_802880::LEU2/cpar2_802880::HIS1	This study (Turner)	TTCGAGACAATGCAGGGGTA	cacggcgcgcctagcagcggTCTCCGTAAAGAGTAGTCAT	ccgctgctaggcgcgccgtgACCAGTGTGATGGATATCTGC	gcagggatgcggccgctgacCATCGCGTGTCAGTGCTTGTagctcggatccactagtaacg	gtcagcggccgcatccctgcATTGAAATTTTGTTTGTATT	GACAAATTTGGTTGTGGCAT	TCACGTGGTCCAACTTGATT	TTCAATTGGACATTCTCACT	TTTCCTTCCACGCCTCTTCC
cpar2_400210 Δ/Δ	cpar2_400210	TF	CPAR2_400210	leu2::FRT/leu2::FRT, his1::FRT/his1::FRT, cpar2_400210::LEU2/cpar2_400210::HIS1	This study (Turner)	CATTAATAGAAATGCAACTA	cacggcgcgcctagcagcggTGATGAATTCTCAGATTCAT	ccgctgctaggcgcgccgtgACCAGTGTGATGGATATCTGC	gcagggatgcggccgctgacTAGAGCTACGCAGACTACCGagctcggatccactagtaacg	gtcagcggccgcatccctgcTAGCTTTGCAGTAAGGTTGT	TCAATTTGAAAGGGGGAATT	TTACTCACATTGATAACGAA	CAACACTGCCTTGTTGTCAG	ATTCTGATACACCACGCCCG
cpar2_401180 Δ/Δ	cpar2_401180	TF	CPAR2_401180	leu2::FRT/leu2::FRT, his1::FRT/his1::FRT, cpar2_401180::LEU2/cpar2_401180::HIS1	This study (Turner)	ACCACTGATACATTTCCTGA	cacggcgcgcctagcagcggTGTGACTAGTTAGCTGATGC	ccgctgctaggcgcgccgtgACCAGTGTGATGGATATCTGC	gcagggatgcggccgctgacTAGTGCTCGGCAGCTCTAGTagctcggatccactagtaacg	gtcagcggccgcatccctgcTGATCATGGGAGAGAGAGGG	ATATTGAAGAAGGCTGCTGC	TTTAATTTCCGTCTTGTGGC	TATTTCCGGTTTAGAAGTGT	ATGCCAATGTTGCCGCATTT
cpar2_106540 Δ/Δ	cpar2_106540	TF	CPAR2_106540	leu2::FRT/leu2::FRT, his1::FRT/his1::FRT, cpar2_106540::LEU2/cpar2_106540::HIS1	This study (Turner)	TTTCTTTGGTAAAATGGGTG	cacggcgcgcctagcagcggTGTACATCGACTAGCAAAGG	ccgctgctaggcgcgccgtgACCAGTGTGATGGATATCTGC	gcagggatgcggccgctgacAGGAACCCAGTTTGACGAAGagctcggatccactagtaacg	gtcagcggccgcatccctgcAACTCATAAGATGTGCGGTT	GTGGAAGAGCATAATCTTAG	AGTCATTGAGGATGGTTTTG	CCGGGCCACTCTGATGTTCC	CGGCAGGCAATCCAATTTGT
cpar2_701070 Δ/Δ	cpar2_701070	TF	CPAR2_701070	leu2::FRT/leu2::FRT, his1::FRT/his1::FRT, cpar2_701070::LEU2/cpar2_701070::HIS1	This study (Turner)	GTTTGTCTCTGTCTGTTAAA	cacggcgcgcctagcagcggCTATGATTTGATTGGATGTG	ccgctgctaggcgcgccgtgACCAGTGTGATGGATATCTGC	gcagggatgcggccgctgacGCTCGTATTAGATAGTCGGTagctcggatccactagtaacg	gtcagcggccgcatccctgcTGCATCCCTAGGGGTTTTAG	TCACTTGATGAGGCAAATAT	GTGTATAGTTAAGCATATGG	GTTCCTGATTGTGTACGTTC	GCTCAAAGAAGGCCTCCCAT
cpar2_300960 Δ/Δ	cpar2_300960	TF	CPAR2_300960	leu2::FRT/leu2::FRT, his1::FRT/his1::FRT, cpar2_300960::LEU2/cpar2_300960::HIS1	This study (Turner)	TTTTTGTTGTCAATTCCTTT	cacggcgcgcctagcagcggTGTATTGTCTTGTGTGATTT	ccgctgctaggcgcgccgtgACCAGTGTGATGGATATCTGC	gcagggatgcggccgctgacATGATCCACCTCACTTGATGagctcggatccactagtaacg	gtcagcggccgcatccctgcGGTGTGAATGTTGTGTAGTG	CAACCCCAGCTGCCAAAACC	GGATCATCGATGACATTAGT	CAACAGAGTATATTGTTCCT	ACATCCAACCGACTCAACTCA
cpar2_208030 Δ/Δ	cpar2_208030	TF	CPAR2_208030	leu2::FRT/leu2::FRT, his1::FRT/his1::FRT, cpar2_208030::LEU2/cpar2_208030::HIS1	This study (Turner)	CTTATAAGTATGAGCGTAAA	cacggcgcgcctagcagcggTTTTGAAACATGTAGTATAT	ccgctgctaggcgcgccgtgACCAGTGTGATGGATATCTGC	gcagggatgcggccgctgacGAGTATCGCACATTCGCATCagctcggatccactagtaacg	gtcagcggccgcatccctgcTAGTATTAGAAAGCATTTAC	ACTCCGAAAGCTTCATGAAT	ATGAGGGCTCTTCTATCTCG	TGACAAGCAGGCAGACACCA	CCCCTCGAGCTGACATTGTT
cpar2_303590 Δ/Δ	cpar2_303590	TF	CPAR2_303590	leu2::FRT/leu2::FRT, his1::FRT/his1::FRT, cpar2_303590::LEU2/cpar2_303590::HIS1	This study (Turner)	GCTTATGAATTGGGTTAAGT	cacggcgcgcctagcagcggTGGCACCGGAAACACACATT	ccgctgctaggcgcgccgtgACCAGTGTGATGGATATCTGC	gcagggatgcggccgctgacCAAGCCTGGGTCACATGATTagctcggatccactagtaacg	gtcagcggccgcatccctgcATCATTGAAGAGAATTTTGT	TTGTCACAGAAGTTCCCACT	TGTACACCAGGTTGTACGAC	TCAAAAATTAACATATATAA	TTGGGTCTCTTCGTTCGACC
cpar2_102000 Δ/Δ	cpar2_102000	TF	CPAR2_102000	leu2::FRT/leu2::FRT, his1::FRT/his1::FRT, cpar2_102000::LEU2/cpar2_102000::HIS1	This study (Turner)	ATTATCACACACCACTTTAT	cacggcgcgcctagcagcggTGCGATAGTTTAATTGAACT	ccgctgctaggcgcgccgtgACCAGTGTGATGGATATCTGC	gcagggatgcggccgctgacACCTGTAGCGGATGTATTGTagctcggatccactagtaacg	gtcagcggccgcatccctgcAGTTTTGCTTTTTGAGAGTG	ACCAAAGTGCCCCAGTTGTG	TTTCAACAACGGTTCATACG	CGTTACGTGCTTTATATGAT	CCACTTCTCTCCACCATCCG
cpar2_400920 Δ/Δ	cpar2_400920	TF	CPAR2_400920	leu2::FRT/leu2::FRT, his1::FRT/his1::FRT, cpar2_400920::LEU2/cpar2_400920::HIS1	This study (Turner)	TAAACTCCCGCCGTTGTTTT	cacggcgcgcctagcagcggTGTACAGTGAAGTAGTCTTT	ccgctgctaggcgcgccgtgACCAGTGTGATGGATATCTGC	gcagggatgcggccgctgacTAGTACGTCCGGCAGTTCCTagctcggatccactagtaacg	gtcagcggccgcatccctgcAATGTTTGTGAAATACACGT	TGATAGTTTGGCCCTTTCAG	CAAGTTGTCTAAAGCTTAAA	TCATCAAACAAATGTTCTCA	CTGCTACTGCTGGTGCTGAT
cpar2_206370 Δ/Δ	cpar2_206370	TF	CPAR2_206370	leu2::FRT/leu2::FRT, his1::FRT/his1::FRT, cpar2_206370::LEU2/cpar2_206370::HIS1	This study (Turner)	GTCAGGAAAAACTTCAAAAC	cacggcgcgcctagcagcggTTAAATCCAAATCGCTTGTC	ccgctgctaggcgcgccgtgACCAGTGTGATGGATATCTGC	gcagggatgcggccgctgacGACCTCGTCTCAGTTGTCGTagctcggatccactagtaacg	gtcagcggccgcatccctgcTGTCAATAGATTGATAGGAA	GTACCTTCTTCTCATCCTCC	GTCGTGCCGGCATTGAAGGA	TCCCCTTCTTCATCATCGTC	AGAGTTGCTGCTATTGCCGT
cpar2_403520 Δ/Δ	cpar2_403520	TF	CPAR2_403520	leu2::FRT/leu2::FRT, his1::FRT/his1::FRT, cpar2_403520::LEU2/cpar2_403520::HIS1	This study (Turner)	AAAGTAGAAAAAAGTTTAAT	cacggcgcgcctagcagcggAGTTAATGGCGAGCAATTGA	ccgctgctaggcgcgccgtgACCAGTGTGATGGATATCTGC	gcagggatgcggccgctgacTCACAGGAGCAAGCGCGATAagctcggatccactagtaacg	gtcagcggccgcatccctgcTGTTTCGATCAAGACAACAA	TTCCATTTCATGTGCCAGCG	AAGAAGAACGAGAAACCTGG	TATATAACCATGAAAAATTC	GGTTGGAACTAGGTGGCTCC
cpar2_806830 Δ/Δ	cpar2_806830	TF	CPAR2_806830	leu2::FRT/leu2::FRT, his1::FRT/his1::FRT, cpar2_806830::LEU2/cpar2_806830::HIS1	This study (Turner)	GACAGCCATCTACACACCTC	cacggcgcgcctagcagcggTTCCGTTGTTTCCCTCGAGG	ccgctgctaggcgcgccgtgACCAGTGTGATGGATATCTGC	gcagggatgcggccgctgacCCGCAGTGGAAAGATCGACAagctcggatccactagtaac	gtcagcggccgcatccctgcAGTTGTATACCGTTTGCAGA	AACCAATTATTGGTCAAGTT	CAGTTAGTTGCATTAGACAA	ATTCAGCAGCATTCTTACCC	CTGGTTGGGGTAGGCAAGAG
cpar2_407720 Δ/Δ	cpar2_407720	TF	CPAR2_407720	leu2::FRT/leu2::FRT, his1::FRT/his1::FRT, cpar2_407720::LEU2/cpar2_407720::HIS1	This study (Turner)	GTGCCAGCAAACAATATAAT	cacggcgcgcctagcagcggGCTGGTATAATGACGAATAG	ccgctgctaggcgcgccgtgACCAGTGTGATGGATATCTGC	gcagggatgcggccgctgacTGCGTCCGCCAATCAATAAAagctcggatccactagtaacg	gtcagcggccgcatccctgcGCATAGATACTCTCATTAAT	TTTGAATCTTGTATGACTCT	AATCCAGCGACATCTTTTAC	ATGGAAGCAGAAGGCAATTG	AGTCATGAATGCACCGTCCA
cpar2_303750 Δ/Δ	cpar2_303750	TF	CPAR2_303750	leu2::FRT/leu2::FRT, his1::FRT/his1::FRT, cpar2_303750::LEU2/cpar2_303750::HIS1	This study (Turner)	AAATAAACTTATAGCCACTG	cacggcgcgcctagcagcggTGGTGTTGTTGTCAAAAATG	ccgctgctaggcgcgccgtgACCAGTGTGATGGATATCTGC	gcagggatgcggccgctgacCAATAGTTACGCAGGTTCGGagctcggatccactagtaacg	gtcagcggccgcatccctgcACAGAAGAGATGGATGTGGT	AATAGAAACCAGTTTGATTA	GCCTGAACCAAATCGTGACT	AATAAAATACTAATGGAACA	TGGTGACACACGAGCAAACT
cpar2_109540 Δ/Δ	cpar2_109540	TF	CPAR2_109540	leu2::FRT/leu2::FRT, his1::FRT/his1::FRT, cpar2_109540::LEU2/cpar2_109540::HIS1	This study (Turner)	AAGAACAAGAAGAAGAAGGA	cacggcgcgcctagcagcggGGTATAATTATTTGTCAGCA	ccgctgctaggcgcgccgtgACCAGTGTGATGGATATCTGC	gcagggatgcggccgctgacATATCTCGCTAACGCGGCAGagctcggatccactagtaac	gtcagcggccgcatccctgcGAAAGGAGGAGGAAGCTAGT	CTGATGAGGCAAATAACGAT	TTGGGTTCTACTCACATTGT	GCCACGTCGGAGTTGTTTCA	GTACCTGCGACGGAGCTATC
cpar2_302230 Δ/Δ	cpar2_302230	TF	CPAR2_302230	leu2::FRT/leu2::FRT, his1::FRT/his1::FRT, cpar2_302230::LEU2/cpar2_302230::HIS1	This study (Turner)	ATCTGCCACCAAAACCCTAT	cacggcgcgcctagcagcggAGTAACTTCTTTTTTCTCTT	ccgctgctaggcgcgccgtgACCAGTGTGATGGATATCTGC	gcagggatgcggccgctgacATTATTGTCCCAGGCGCTCGagctcggatccactagtaacg	gtcagcggccgcatccctgcCCGCTTTCGAACCTGTTTTG	TAGATTTACCAGGACTTCTA	TGGGTGATTGTGTAAGCCTT	GCAACTGGGGTTGTGGTTGT	TTACACATCCGATGGGGCAC
cpar2_109760 Δ/Δ	cpar2_109760	TF	CPAR2_109760	leu2::FRT/leu2::FRT, his1::FRT/his1::FRT, cpar2_109760::LEU2/cpar2_109760::HIS1	This study (Turner)	CTTGTCACCATTGTGGTACC	cacggcgcgcctagcagcggAAAGGGATCAGTGGTTTCTA	ccgctgctaggcgcgccgtgACCAGTGTGATGGATATCTGC	gcagggatgcggccgctgacATATTCAGACCAGCGCAGGCagctcggatccactagtaac	gtcagcggccgcatccctgcTTCAGGCGGGAGTGTGCATT	CTTTTTTGTTTGAGCTTAGT	CAATATACTCTTGGATATAC	TGAACAAATAGAGTTGCAAA	AATGTGTGCCACCAATTGCC
cpar2_602450 Δ/Δ	cpar2_602450	TF	CPAR2_602450	leu2::FRT/leu2::FRT, his1::FRT/his1::FRT, cpar2_602450::LEU2/cpar2_602450::HIS1	This study (Turner)	AAACAACCAAATAAATCACA	cacggcgcgcctagcagcggTTTGGAAAACTCTGACGACG	ccgctgctaggcgcgccgtgACCAGTGTGATGGATATCTGC	gcagggatgcggccgctgacAATAGCTGGTTAAGCCGTCGagctcggatccactagtaac	gtcagcggccgcatccctgcAGAAGAGAGTCACAACAAGG	AACGATCACCTTGTGGGTAT	ATTGAAGCCGTATGAAAAAG	TGATGCAATAGTTGAAGGAG	GGTAGGTGGTCCTGTGCATC
cpar2_202450 Δ/Δ	cpar2_202450	TF	CPAR2_202450	leu2::FRT/leu2::FRT, his1::FRT/his1::FRT, cpar2_202450::LEU2/cpar2_202450::HIS1	This study (Turner)	TTTGTATCACAAAACCATTG	cacggcgcgcctagcagcggAGCAAAATATTTCAATTGCG	ccgctgctaggcgcgccgtgACCAGTGTGATGGATATCTGC	gcagggatgcggccgctgacCGGGTATCATGGTCAGTAATagctcggatccactagtaac	gtcagcggccgcatccctgcTGTCTTTTTAGCATGTTCGT	CGTTCACTTGCTTTAACGATCA	TGCAACAGACCAACTCTTGT	TATTTTCATTGGGCGCTTAA	GATGAACCTGGTTGCGATGC
cpar2_202900 Δ/Δ	cpar2_202900	TF	CPAR2_202900	leu2::FRT/leu2::FRT, his1::FRT/his1::FRT, cpar2_202900::LEU2/cpar2_202900::HIS1	This study (Turner)	ACATTCTACGAATTTGAACA	cacggcgcgcctagcagcggTGTTGGATTATGAGTTGATG	ccgctgctaggcgcgccgtgACCAGTGTGATGGATATCTGC	gcagggatgcggccgctgacCGTTGATAGCAAGCGAGATAagctcggatccactagtaacg	gtcagcggccgcatccctgcATGAGGCGGCTATGTTTCCT	GAAGGAAGCTATCCAGTAAA	TGGCTCGTGCATCGACATCA	TCACCGGCTGCACCACCCAC	CTTGACAACTTTAGTATTGCCA
cpar2_203270 Δ/Δ	cpar2_203270	TF	CPAR2_203270	leu2::FRT/leu2::FRT, his1::FRT/his1::FRT, cpar2_203270::LEU2/cpar2_203270::HIS1	This study (Turner)	AAAAAACTCCCCTCTTTATT	cacggcgcgcctagcagcggTGCTAGTTTTTGATTTACTG	ccgctgctaggcgcgccgtgACCAGTGTGATGGATATCTGC	gcagggatgcggccgctgacCTAGACCGTTAGATCCGTTTagctcggatccactagtaacg	gtcagcggccgcatccctgcAGTAGAATGTAATGTAAAAT	GGTAATGAGCGTGCACCAAT	CCGTTATAGCCACCTCGTGC	AGTTTTATTGTACACAGAAA	GTGCGCCAAATCTGGTAACT
cpar2_702590 Δ/Δ	cpar2_702590	TF	CPAR2_702590	leu2::FRT/leu2::FRT, his1::FRT/his1::FRT, cpar2_702590::LEU2/cpar2_702590::HIS1	This study (Turner)	AACGCATTGGATACGGACCC	cacggcgcgcctagcagcggAATGGACAATGTGGTAAAGC	ccgctgctaggcgcgccgtgACCAGTGTGATGGATATCTGC	gcagggatgcggccgctgacGGCACAGACGAATCACTGACagctcggatccactagtaacg	gtcagcggccgcatccctgcACGTGAAACTGTACTAGAAA	AACTTTAAAAGCTGAATTGG	TGCCATCATTGCCAAACTCA	CAATAAATTTAAATTCCGAT	GACGTGTTTGTTTAAATGAC
cpar2_106680 Δ/Δ	cpar2_106680	TF	CPAR2_106680	leu2::FRT/leu2::FRT, his1::FRT/his1::FRT, cpar2_106680::LEU2/cpar2_106680::HIS1	This study (Turner)	AGATTGCGTGTGCCCAAAAT	cacggcgcgcctagcagcggTCTTGACAAAATGTAATAGA	ccgctgctaggcgcgccgtgACCAGTGTGATGGATATCTGC	gcagggatgcggccgctgacAGGAGTACAGCCACTGCATCagctcggatccactagtaacg	gtcagcggccgcatccctgcGCTCATATGAGGTAAGGGAC	TATCGCTTTAGAATTTGCAA	GCTTTCATTGTAGCCACTGA	AATGGTTATCACCAACTGAA	CTCTTTTTGCCGCAGTAGCC
cpar2_100830 Δ/Δ	cpar2_100830	TF	CPAR2_100830	leu2::FRT/leu2::FRT, his1::FRT/his1::FRT, cpar2_100830::LEU2/cpar2_100830::HIS1	This study (Turner)	TGTAATAGAGTACATGTATT	cacggcgcgcctagcagcggTATATATACGTATTAAATTG	ccgctgctaggcgcgccgtgACCAGTGTGATGGATATCTGC	gcagggatgcggccgctgacACAGTTGCAGCATCGTGTCGagctcggatccactagtaacg	gtcagcggccgcatccctgcAGTTTAAGGGGGTTAGTTTA	TCTCTCAAACGTTTTATGCT	CCAGAGTCGAAGGTGGTTTA	TTCCGATATGGGGAACTACA	GGCATTGACGTCATTGGCAA
cpar2_101010 Δ/Δ	cpar2_101010	TF	CPAR2_101010	leu2::FRT/leu2::FRT, his1::FRT/his1::FRT, cpar2_101010::LEU2/cpar2_101010::HIS1	This study (Turner)	TTACTCTATAGGAGTTAGGT	cacggcgcgcctagcagcggAAAAGAAATGGCCTGTGTGA	ccgctgctaggcgcgccgtgACCAGTGTGATGGATATCTGC	gcagggatgcggccgctgacACATCCTTGGCATGGGAGATagctcggatccactagtaacg	gtcagcggccgcatccctgcGAAAAAAGAGACAATAGGTT	TACATTAATCCTGGCATTTC	GCTCATTGTGTCAATTGTTT	TTCAGTTTCACCCTTCCAGG	TTTCCTTCTTCGTGGGCTCC
cpar2_202710 Δ/Δ	cpar2_202710	TF	CPAR2_202710	leu2::FRT/leu2::FRT, his1::FRT/his1::FRT, cpar2_202710::LEU2/cpar2_202710::HIS1	This study (Turner)	TGGTACACGACCCTATCTCC	cacggcgcgcctagcagcggATTGTTCTTATGTGGTTTAT	ccgctgctaggcgcgccgtgACCAGTGTGATGGATATCTGC	gcagggatgcggccgctgacCGTCGAGCCAAACTGTTAAAagctcggatccactagtaacg	gtcagcggccgcatccctgcGCTAGGGGGCTGTTATTTCT	CAGTCTACGCCATTGGATAC	TCTGGATTTGATCCCTAATG	TGAAGATGATTTGGATGATT	TGCTTTGGGTGTGGAAAGGA
cpar2_401290 Δ/Δ	cpar2_401290	TF	CPAR2_401290	leu2::FRT/leu2::FRT, his1::FRT/his1::FRT, cpar2_401290::LEU2/cpar2_401290::HIS1	This study (Turner)	TTGAATTGCGTGAATCTTAC	cacggcgcgcctagcagcggAACTTGGTTTCCAGTGACAT	ccgctgctaggcgcgccgtgACCAGTGTGATGGATATCTGC	gcagggatgcggccgctgacTATAACACTGGCGAACTAGCagctcggatccactagtaacg	gtcagcggccgcatccctgcAATAGAGGTCCTTTAGAACA	GATTCGTCTGGCACTAGCAA	GACCAATCGCACTCCTAACA	ATTTTTCTCTGATGTAGCGC	TGCACGATGTGGTATTGGCT
* Briefly:
Primers 1, 2, 3, 4, 5, 6 were used to construct the mutants
Transformants were screened by PCR using primers in the genome outside the integration site and within the auxotrophic marker genes (Table below).
(5'check + His1-check-Rv; HIS2-check-Fv + 3'check); (5'check + Leu1-check-Rv; Leu2-check-Fv + 3'check);
Primer		Sequence	Description
HIS1-check Rv		AAAATCAATGGGCATTCTCG	Reverse primer binding within the CdHIS1 marker gene (used to verify all gene deletions).
HIS2-check Fw		TGGGAAGCAGACATTCAACA	Forward primer binding within the CdHIS1 marker gene (used to verify all gene deletions).
LEU1-check Rv		GAAGTTGGTGACGCGATTGT	Reverse primer binding within the CmLEU2 marker gene (used to verify all gene deletions).
LEU2-check Fw		TTCCCCTTCAATGTATGCAA	Forward primer binding within the CmLEU2 marker gene (used to verify all gene deletions).
The absence of the targeted open reading frame (ORF) was confirmed by PCR using the 5’ check forward primer and a reverse primer within the target gene (ORF check rev)

## Sheet: CLIB214 edited mutants
Table S1. List of strains and oligos used. TF: transcription factor; PK: protein kinase
Strain Name	ID in the library		CPAR ID (editing)	Genotype	sequenced	Comments	# of independent clones	Reference	gRNA_TOP	gRNA_BOT	Unique Barcode (SCREENPRIMER_FWD)	RT_TOP	RT_BOT	SEQPRIMER_FWD	SCREENPRIMER_REV
CLIB214	CLIB214							Type Strain
e103720	e103720	TF	CPAR2_103720	cpar2_103720::StopTAG/cpar2_103720::StopTAG			2	This study (Morio)	CCACTACAAGCACATTACCACCT	AACAGGTGGTAATGTGCTTGTAG	ACTGGACGACTAGGCTATAT	TTCACTAGATTCACTCAAAACATCTACAAGCACATTACCATAATAGACTGGACGACTAGGCTA	GTTGTTCCTTCTCTTCTTGAGTCTTGGCTCTCTTCCTAGGATATAGCCTAGTCGTCCAGTCTA	CACCACTCGACATTGTTGTTG	TAGCCAGTGGCAATCTTGTG
e103980	e103980	TF	CPAR2_103980	cpar2_103980::StopTAG/cpar2_103980::StopTAG			2	This study (Morio)	CCATGCACCTCCAGATCTAGAGC	AACGCTCTAGATCTGGAGGTGCA	AGAACGTAGCCCAAGGTTGA	TTGCGATCGAATAGTACTGAGAATGCACCTCCAGATCTAGAGTAATAGAGAACGTAGCCCAAGGT	CTAACATCTTCTGCATTCAAGTGAGTCAATGATTCCAGCTTCAACCTTGGGCTACGTTCTCTA	CCAACGAAGAAGGACAGGAA	TCTATCCACAACGGCATCTG
e105230	e105230	TF	CPAR2_105230	cpar2_105230::StopTAG/cpar2_105230::StopTAG			2	This study (Morio)	CCAAGGATGAGAATGTTTAGTAG	AACCTACTAAACATTCTCATCCT	AGATCATTTGAACGCCACTC	AAGTACAGTCCCCCACACTATCATGACAACAACACCACTATAATAGAGATCATTTGAACGCCA	TTTTATCAAATTGATTCACTTCCAGGATGAGAATGTTTAGGAGTGGCGTTCAAATGATCTCTA	GGTCAAAGCGGATTACTTGG	CCAATCTGCTCCTTGGTGTT
e107310	e107310	TF	CPAR2_107310	cpar2_107310::StopTAG/cpar2_107310::StopTAG			2	This study (Morio)	CCATCTGATTTCCATAATGGTGG	AACCCACCATTATGGAAATCAGA	AGGTGACTCCTTCCATCGGT	GAAGTAGGTCAAGCTCGAATGTTTCTGATTTCCATAATGGATAATAGAGGTGACTCCTTCCATC	CGATGTGCCAGTAGTAAATGTATTGGAACTCGATCCTCCAACCGATGGAAGGAGTCACCTCTA	ATTGCTCCGCGTTATTTCAT	GGTGCCAAATAACCACCATC
e107840	e107840	TF	CPAR2_107840	cpar2_107840::StopTAG/cpar2_107840::StopTAG			2	This study (Morio)	CCATACTGGGGTGATGAGTTAAG	AACCTTAACTCATCACCCCAGTA	AGTTATACCGCATCACGTCG	AAGATACTGAATCCCCATTGAAAAGCATGGAAAACCCCTTATAGTAAAGTTATACCGCATCAC	CAACCTGTAGCAACGATTGCAATTACTGGGGTGATGAGTTCGACGTGATGCGGTATAACTTTAC	ACAACAAGCTGATGGGGAAC	TCGACGAGCAGAAGATGCTA
e108080	e108080	TF	CPAR2_108080	cpar2_108080::StopTAG/cpar2_108080::StopTAG			2	This study (Morio)	CCACTAGAGGAGGTGACAAAAGG	AACCCTTTTGTCACCTCCTCTAG	ATACATGGTGGCATTGCGCT	GCACAAGATGAGTTCTTACTATCCTAGAGGAGGTGACAAATAATAGATACATGGTGGCATTGC	TAGCTTGATTGTAGTTGTTATTGTTGTTGTATCTCCCCCTAGCGCAATGCCACCATGTATCTA	TGGATGAAAAGAGGGAGTGG	TTTGCTGGTTGTTGGTTTGA
e108570	e108570	TF	CPAR2_108570	cpar2_108570::StopTAG/cpar2_108570::StopTAG			2	This study (Morio)	CCATTGTATTTATGTTCTTGCGA	AACTCGCAAGAACATAAATACAA	ATAGAGCCGTGCCACTCGAT	ACAACAACAACAGCAGCAGCTAAATCAATTACCACCGTCGTAATAGATAGAGCCGTGCCACTC	TGAGACAAGCACGGTAATTTCTCTTGTATTTATGTTCTTGATCGAGTGGCACGGCTCTATCTA	GCAACGCTTTAGCATTCTCC	ACCCGGTAAAGACTGTGGTG
e109060	e109060	TF	CPAR2_109060	cpar2_109060::StopTAG/cpar2_109060::StopTAG			2	This study (Morio)	CCATGAGGAGATGTAAAGACGAT	AACATCGTCTTTACATCTCCTCA	ATAGGCGGACCACCTCTAAG	TGATATGAATGATTCTCCCATAATGAGGAGATGTAAAGACTAATAGATAGGCGGACCACCTCT	AATTGCAACATTTCAAAATCTGTGTAGCATTCACCCAATCCTTAGAGGTGGTCCGCCTATCTA	TGAGACTGCCCTTTTTGCTT	GTGGTGGTTTGGCTTTCACT
e202090	e202090	TF	CPAR2_202090	cpar2_202090::StopTAG/cpar2_202090::StopTAG			2	This study (Morio)	CCAAAAGGGATCTTGGTGCTACC	AACGGTAGCACCAAGATCCCTTT	CGGAACTCGGCATTACCTTG	ATTTGGATCCTAATCTTTTATCACATTTATCACCCCGGGTATAATAGCGGAACTCGGCATTAC	TGGCGGCCCGATTCTGAATTGAGAAAGGGATCTTGGTGCTCAAGGTAATGCCGAGTTCCGCTAT	CGAGAGATGTTGTGCGGATA	TGACAGTTGTGTGGGATGGT
e203290	e203290	TF	CPAR2_203290	cpar2_203290::StopTAG/cpar2_203290::StopTAG			2	This study (Morio)	CCATGATGATGATGTGTAATATC	AACGATATTACACATCATCATCA	CTAGAGGGCAAATCTGCGAA	CAATAACTCATCTACTGCAAATGTTGTGAGTAGACCAGATTAATAGCTAGAGGGCAAATCTGC	TATTGTTTTGACTTAGTGTTTGGTGATGATGATGTGTAATTTCGCAGATTTGCCCTCTAGCTA	TGTGTTTCAAGTGGAGGGGTA	GGGTTTCTGATTGCTTTTCG
e203960	e203960	TF	CPAR2_203960	cpar2_203960::StopTAG/cpar2_203960::StopTAG			2	This study (Morio)	CCAATCCTACCTGCGGATTCGGA	AACTCCGAATCCGCAGGTAGGAT	CTCAGTCAGTAGGAGTAATG	GTGCCGAGGGTGATGAATATTCTATCCTACCTGCGGATTCGTAATAGCTCAGTCAGTAGGAGTA	AAAATCGGTACCGTTGCTGTCTGCACGCCCGACCCCATCCCATTACTCCTACTGACTGAGCTA	AAGAGCAATGATCGGACACC	CCTTATTAGGGCCAGCATCA
e209930	e209930	TF	CPAR2_209930	cpar2_209930::StopTAG/cpar2_209930::StopTAG			2	This study (Morio)	CCAGTTACCCATGCCTTCCCACG	AACCGTGGGAAGGCATGGGTAAC	GCACATCTGCGTAACCGTAG	AATCAACTTCAAGTGCCACAGCAGTTACCCATGCCTTCCCACTAATAGGCACATCTGCGTAACCG	AAGGTAGATTGTGATGGAGCCGATGGTGTAGATACCACGTCTACGGTTACGCAGATGTGCCTA	ACCACTTGGCGTCATCGTAT	CTGTGATGCGTCGTTTCTGT
e210910	e210910	TF	CPAR2_210910	cpar2_210910::StopTAG/cpar2_210910::StopTAG			2	This study (Morio)	CCACAGAATGGCAGAAGGTGCAG	AACCTGCACCTTCTGCCATTCTG	GCATAGAGTCTGACACATTC	GATGATGAAGCTGAGGGAGGAGACAGAATGGCAGAAGGTGCATAATAGGCATAGAGTCTGACAC	CTTTTTCTCTTGCCCTTCTTGTTTTGTTGTCCATCCGCTGGAATGTGTCAGACTCTATGCCTAT	GAAAATGCTACTTCCGAGCAA	TCAATGGCATTCACTTCAAA
e211180	e211180	TF	CPAR2_211180	cpar2_211180::StopTAG/cpar2_211180::StopTAG			2	This study (Morio)	CCAGAGCTTATATCAAGCGACGC	AACGCGTCGCTTGATATAAGCTC	GCATGGCAGCAAGCAGCATA	CATTGAGTGCATCACCGAAAGAAGAGCTTATATCAAGCGACTAATAGGCATGGCAGCAAGCAG	GGATATGTTATTTCCCCCATCATTGTTTTCAGTACCTGCGTATGCTGCTTGCTGCCATGCCTAT	CATCGCCTTTGCTTCCTATC	GGCGTAAGCGACACAAGTTT
e300660	e300660	TF	CPAR2_300660	cpar2_300660::StopTAG/cpar2_300660::StopTAG			2	This study (Morio)	CCAGTCGTCACAATGGTTGCAAG	AACCTTGCAACCATTGTGACGAC	ATGACAAGAGGGTCGAACTC	GTGGGAGCAAGTGGAATACCTCATTAAGAGATACCCACTTTAATAGATGACAAGAGGGTCGAA	CTACAATCTCGTTGTCATCAGTTGTCGTCACAATGGTTGCGAGTTCGACCCTCTTGTCATCTA	CCCGCTAATTGATTGCAAAA	CGCTAGCAAAATCCCATGTT
e301500	e301500	TF	CPAR2_301500	cpar2_301500::StopTAG/cpar2_301500::StopTAG			2	This study (Morio)	CCATGGAGTGTATACGAGGTCAT	AACATGACCTCGTATACACTCCA	ACACTTCCTGAACATTGGGC	AAACGATGTCAAATACTCTTGTATGGAGTGTATACGAGGTTAATAGACACTTCCTGAACATTG	GTAGTGGTCTATCGTGATGTTTGCATGTGGACGACCTATGGCCCAATGTTCAGGAAGTGTCTA	AAAACCAGATTAAACCAGTGTCG	GTGGTGGTGCCTTTTCAACT
e301940	e301940	TF	CPAR2_301940	cpar2_301940::StopTAG/cpar2_301940::StopTAG			2	This study (Morio)	CCAAATAAACAGAACCGATTTGG	AACCCAAATCGGTTCTGTTTATT	ATTACTCTACGCAGCGGAGG	ACAACAACACACAGGTAACAAATAATAAACAGAACCGATTTTAATAGATTACTCTACGCAGCGG	ATTCTTTGTATCTTGATGATGATGATAATGGTTACCACCACCTCCGCTGCGTAGAGTAATCTA	TGTTGTTGTTGTTGGGTGTC	GAAATCCTGGTGATGGCTGT
e302555	e302555	TF	CPAR2_302555	cpar2_302555::StopTAG/cpar2_302555::StopTAG			2	This study (Morio)	CCATTAGGTGATACTGGTGATCT	AACAGATCACCAGTATCACCTAA	ATTCTGAGGCGACTGGACCT	TATGTCTGACTTACTTAATTATTCTATTATGCAACCAAGATAATAGATTCTGAGGCGACTGGA	TGCTAAATGATGATGATGACACATTAGGTGATACTGGTGAAGGTCCAGTCGCCTCAGAATCTA	TCAACTGTATCGTTTGAGATTCC	GGGTTGAGTTTGTTGCTGGT
e304240	e304240	TF	CPAR2_304240	cpar2_304240::StopTAG/cpar2_304240::StopTAG			2	This study (Morio)	CCAGTTGTTCGATGGACACAGAG	AACCTCTGTGTCCATCGAACAAC	CACCAGTTTGTGAAGACGCG	TACAAGAGGATAGCTATAAAGACGTTGTTCGATGGACACAGTAATAGCACCAGTTTGTGAAGAC	GAAATTGTTGGTATTTATAACAACAAAGCTATCCCCACTCCGCGTCTTCACAAACTGGTGCTA	ATTATATCACCCGCCTCTGC	TACTTGAAGGCCCCTTCCTT
e700880	e700880	TF	CPAR2_700880	cpar2_700880::StopTAG/cpar2_700880::StopTAG			2	This study (Morio)	CCAGTTGCTTTACATGTCGTACA	AACTGTACGACATGTAAAGCAAC	GCTCATCTAACAGTATTGGC	CAAACGTTCCAAAACTTTTACTGGTTGCTTTACATGTCGTTAATAGGCTCATCTAACAGTATT	CACACAGTGGTTTCTTCAAGTCACATTTGATCTTCCTTGTGCCAATACTGTTAGATGAGCCTA	GCTCATCTAACAGTATTGGC	TTCTGCAAGTGTGCAAGGTC
e806730	e806730	TF	CPAR2_806730	cpar2_806730::StopTAG/cpar2_806730::StopTAG			2	This study (Morio)	CCAATTCTGCACGATACTTGTTG	AACCAACAAGTATCGTGCAGAAT	CCGATGTATGAACAGTTTCC	ATACCCTACTACAGAAATACCAAACCACAATAGATAGATAGCCGATGTATGAACAG	TTTGGTCAACTTCATTCTGCACGATACTTGGGAAACTGTTCATACATCGGCTATC	CATGGATCAAGAAGAAGTGG	GTCATCCTCACCTTCTTCAA
e807380	e807380	TF	CPAR2_807380	cpar2_807380::StopTAG/cpar2_807380::StopTAG			1	This study (Morio)	CCACTCCTGTGTCGGATGTATTG	AACCAATACATCCGACACAGGAG	CCGGCCATGTATAGAATAAG	TACGGCGGTGAATATCCCACTAAACCACAATAGATAGATAGCCGGCCATGTATAGA	GTTGTGTTTGGCCCTCCTGTGTCGGATGTACTTATTCTATACATGGCCGGCTATC	CCTCACACATATACATTCCC	GCTTCTAAGTCTGGCAAGTA
e104020	e104020	PK	CPAR2_104020	cpar2_104020::StopTAG/cpar2_104020::StopTAG			2	This study (Lombardi, Salzberg, O'Cinneide, 1Set)	CCATGATCGTCGAATGTCAGCGG	AACCCGCTGACATTCGACGATCA	AGAATCTCTAGCAAGCCCTA	TCAATAATCCAAATGATCGTCGAATGTCAGTAGATAGATAGAGAATCTCTAGCAAG	ACGGATTACTGTATGTTCCATCCACCGCCGTAGGGCTTGCTAGAGATTCTCTATC	CATCTGTAATGTCACAGTCC	GGGGTGATATGTGGATAGAA
e105560	e105560	PK	CPAR2_105560	cpar2_105560::StopTAG/cpar2_105560::StopTAG			2	This study (Lombardi, Salzberg, O'Cinneide, 1Set)	CCAGAATTTAAGCTTTACGGCAC	AACGTGCCGTAAAGCTTAAATTC	AGATTCACGGCTAGTCACCT	CATTTGCCAACTTGAATTTAAGCTTTACGGTAGATAGATAGAGATTCACGGCTAGT	TAGGTTGTGCATCAACAATCAATTCCGGTGAGGTGACTAGCCGTGAATCTCTATC	GAGTTATCGATTCAGAAGGG	GAATGCAGAAGGAAATTGGC
e106120	e106120	PK	CPAR2_106120	cpar2_106120::StopTAG/cpar2_106120::StopTAG			2	This study (Lombardi, Salzberg, O'Cinneide, 1Set)	CCAAGTCTATGCTCGTTGGCTTG	AACCAAGCCAACGAGCATAGACT	AGCCTAGCGTATCTGTCATT	TCAATACTTTCACAACCATGTTATCCCCAATAGATAGATAGAGCCTAGCGTATCTG	TTGATGTAGTCAAAGTCTATGCTCGTTGGCAATGACAGATACGCTAGGCTCTATC	CACAACCAACTAAGAGACAG	GTCTCTCCTCTTGTACTCTT
e107760	e107760	PK	CPAR2_107760	cpar2_107760::StopTAG/cpar2_107760::StopTAG			1	This study (Lombardi, Salzberg, O'Cinneide, 1Set)	CCAGCTCGAGCACCAGATCCCAA	AACTTGGGATCTGGTGCTCGAGC	AGTGGGATCTCCTCAAGCTC	TTTTTCAGAAAAGTTGGTCACAATCCGTTGTAGATAGATAGAGTGGGATCTCCTCA	CTTGTAAACTTGTGCTCGAGCACCAGATCCGAGCTTGAGGAGATCCCACTCTATC	CTATCCACACTAGATGTAGG	CTCATACTTTCCTCGATTGG
e201170	e201170	PK	CPAR2_201170	cpar2_201170::StopTAG/cpar2_201170::StopTAG			2	This study (Lombardi, Salzberg, O'Cinneide, 1Set)	CCATTTGGACCCACTCCTTCTCC	AACGGAGAAGGAGTGGGTCCAAA	CGATTGATCCGATGCGGCTT	ACAAATGGTGCAATTTGGACCCACTCCTTCTAGATAGATAGCGATTGATCCGATGC	AATTTTGAAGCAAGAAAGATGGATCCTGGAAAGCCGCATCGGATCAATCGCTATC	GTCATTCTCTACCAGTGAAG	GGGTTATCCTCTTGTATCTC
e201420	e201420	PK	CPAR2_201420	cpar2_201420::StopTAG/cpar2_201420::StopTAG			2	This study (Lombardi, Salzberg, O'Cinneide, 1Set)	CCATCAAGATTCAGATGATATTC	AACGAATATCATCTGAATCTTGA	CGCCACACTTGGTTAAATAC	ATGAACCATTTACTCAAGATTCAGATGATATAGATAGATAGCGCCACACTTGGTTA	TTTGAGATAGTTGATGTTCATACTCCTGAAGTATTTAACCAAGTGTGGCGCTATC	GTAGTTAAGCAACCAGAGTC	GGAAAAGGACCCAATGATAG
e202440	e202440	PK	CPAR2_202440	cpar2_202440::StopTAG/cpar2_202440::StopTAG			2	This study (Lombardi, Salzberg, O'Cinneide, 1Set)	CCAGTTGCTTGTTGAGCCATGAT	AACATCATGGCTCAACAAGCAAC	ACATCGAGGGAATACGACGC	CAGCCAGAGGATACCCTGAAGCGCCCAATCTAGATAGATAGACATCGAGGGAATAC	AATTGCAGGTGCAGTTGCTTGTTGAGCCATGCGTCGTATTCCCTCGATGTCTATC	CAACTAACTCTGATCCCAAC	GTGATGGGATATGCAAGACT
e202940	e202940	PK	CPAR2_202940	cpar2_202940::StopTAG/cpar2_202940::StopTAG			2	This study (Lombardi, Salzberg, O'Cinneide, 1Set)	CCATGTGGCGATAATGCCATTAC	AACGTAATGGCATTATCGCCACA	CTAAGACGTGGGAATTATGC	TGATCACGGTACTTGTGGCGATAATGCCATTAGATAGATAGCTAAGACGTGGGAAT	TCATCGTACTCATCTTCTTCCTCTCCCGTAGCATAATTCCCACGTCTTAGCTATC	CAACTCTCAATTCCTCGTAC	GGTAGGTTATTCTGATGTGG
e203430	e203430	PK	CPAR2_203430	cpar2_203430::StopTAG/cpar2_203430::StopTAG			2	This study (Lombardi, Salzberg, O'Cinneide, 1Set)	CCATGTCGCAACGACACTGGATG	AACCATCCAGTGTCGTTGCGACA	CTAGTACGCGGCAGGTATCT	TTACTAGATTACCTGAAAAAACATCCACATTAGATAGATAGCTAGTACGCGGCAGG	ATAGCCAGCTAATTGTCGCAACGACACTGGAGATACCTGCCGCGTACTAGCTATC	CAGAATACTGCTCAAGGGTA	GAGCCTTCTACTGATTCTTG
e205170	e205170	PK	CPAR2_205170	cpar2_205170::StopTAG/cpar2_205170::StopTAG			2	This study (Lombardi, Salzberg, O'Cinneide, 1Set)	CCAACTTTGCGCAGTGGCTCTTG	AACCAAGAGCCACTGCGCAAAGT	CTTCTGAGAGGAGACTTATG	TTTTACAAAATGGTTAGAGGGCAGCCACAATAGATAGATAGCTTCTGAGAGGAGAC	AATGTTAAACACAACTTTGCGCAGTGGCTCCATAAGTCTCCTCTCAGAAGCTATC	GAAGTATGAATGACACACGG	GGAATCAAGTCTAGCCAATC
e206880	e206880	PK	CPAR2_206880	cpar2_206880::StopTAG/cpar2_206880::StopTAG			2	This study (Lombardi, Salzberg, O'Cinneide, 1Set)	CCAATGGTCTCGATTGCCATTTG	AACCAAATGGCAATCGAGACCAT	TGCGACTCACTCTCATATTG	TTGCATTGCCCAAGATTGACGTGTCCTCAATAGATAGATAGTGCGACTCACTCTCA	AGAGATAGTAGTCATGGTCTCGATTGCCATCAATATGAGAGTGAGTCGCACTATC	AGTGGATCACACAAGATTCC	GCAAGAATGACCTAGATGCT
e206950	e206950	PK	CPAR2_206950	cpar2_206950::StopTAG/cpar2_206950::StopTAG			2	This study (Lombardi, Salzberg, O'Cinneide, 1Set)	CCATAAATGACGACAGTGGGTTG	AACCAACCCACTGTCGTCATTTA	GAGACGACCCAATTACGCGA	TGACCCTTCACCAGAAACAAAATTCCTCAATAGATAGATAGGAGACGACCCAATTA	GGAGATGTTGGTGTAAATGACGACAGTGGGTCGCGTAATTGGGTCGTCTCCTATC	CTCAACAAGACGGTAACTAG	GGGTAAGTTTGGTATATGCG
e207170	e207170	PK	CPAR2_207170	cpar2_207170::StopTAG/cpar2_207170::StopTAG			2	This study (Lombardi, Salzberg, O'Cinneide, 1Set)	CCAAGACGTTGCCTGACCCACTG	AACCAGTGGGTCAGGCAACGTCT	GAGAGTAAGGAATGCCACCC	GCTCTCCCTCTTCATCGCATCCAACCTCAGTAGATAGATAGGAGAGTAAGGAATGC	AGTTAGAAGCGGCAGACGTTGCCTGACCCAGGGTGGCATTCCTTACTCTCCTATC	CTCGAGAAGGACTATATCTG	GGGAGTTACTATTGATGCTC
e207500	e207500	PK	CPAR2_207500	cpar2_207500::StopTAG/cpar2_207500::StopTAG			2	This study (Lombardi, Salzberg, O'Cinneide, 1Set)	CCACACCTATCTCATAACCATCG	AACCGATGGTTATGAGATAGGTG	GAGCCTAGTCGCTATCATCT	TGAGTATACAAGGCACCTATCTCATAACCATAGATAGATAGGAGCCTAGTCGCTAT	TTTTGGCCCAGCGCAATTCTTCTGCCTCGAAGATGATAGCGACTAGGCTCCTATC	GATTAAGTCACAGAGTACCG	GAGCAGATTAAGTGAGATGG
e207940	e207940	PK	CPAR2_207940	cpar2_207940::StopTAG/cpar2_207940::StopTAG			2	This study (Lombardi, Salzberg, O'Cinneide, 1Set)	CCAATTGGGTATTTAGTCAATAA	AACTTATTGACTAAATACCCAAT	AACAGTTCCGAAGGCTGAGC	ACCACAGAAAATATCTTGAAGCATCCATTATAGATAGATAGAACAGTTCCGAAGGC	ATCCTCATTTGAGATTGGGTATTTAGTCAAGCTCAGCCTTCGGAACTGTTCTATC	GCTCCAGAAATTGTTAGTGG	GGGCGATTCTGTTATTACTC
e208870	e208870	PK	CPAR2_208870	cpar2_208870::StopTAG/cpar2_208870::StopTAG			2	This study (Lombardi, Salzberg, O'Cinneide, 1Set)	CCAACAATTGTAATATATTGGGG	AACCCCCAATATATTACAATTGT	GATCAGCGTACACTCTCAGG	AATTAGAATTATGAAACGTACGCACCACCCTAGATAGATAGGATCAGCGTACACTC	TCAAACGATTCATACAATTGTAATATATTGCCTGAGAGTGTACGCTGATCCTATC	AATGATGTACTCAAGGGAGC	AGTATATCCAGCAGTACCAC
e209520	e209520	PK	CPAR2_209520	cpar2_209520::StopTAG/cpar2_209520::StopTAG			2	This study (Lombardi, Salzberg, O'Cinneide, 1Set)	CCATGACGTTGCCGTATTCGGAG	AACCTCCGAATACGGCAACGTCA	GATTAGCATCGACCACTACG	TATCACCATCATCAAATTCGTCATCCACTCTAGATAGATAGGATTAGCATCGACCA	TCGATGACAAGGATGACGTTGCCGTATTCGCGTAGTGGTCGATGCTAATCCTATC	CTTCATTAGCTATTCCACCC	GTCCATCCATATACTCCATC
e210000	e210000	PK	CPAR2_210000	cpar2_210000::StopTAG/cpar2_210000::StopTAG			1	This study (Lombardi, Salzberg, O'Cinneide, 1Set)	CCAAAGGGTGTACTCTATATCGA	AACTCGATATAGAGTACACCCTT	GCACCCTTAACATTTGATGC	TGTCAACAAAACAAAGGGTGTACTCTATATTAGATAGATAGGCACCCTTAACATTT	TCTTGCTATTGACGTCCGAATAGACCTTCGGCATCAAATGTTAAGGGTGCCTATC	CGAAAAACCACCATCACCGA	CAAGCCCCAATCTATCAATC
e210090	e210090	PK	CPAR2_210090	cpar2_210090::StopTAG/cpar2_210090::StopTAG			2	This study (Lombardi, Salzberg, O'Cinneide, 1Set)	CCATTAGGAATGGGTCCTGGAGG	AACCCTCCAGGACCCATTCCTAA	GCACGAGGAGCATTTATTAG	AGATATACCAAGATTAGGAATGGGTCCTGGTAGATAGATAGGCACGAGGAGCATTT	ACAAGGGCTGTGTACGCTTTTTCGCCACCTCTAATAAATGCTCCTCGTGCCTATC	CTGACTTGGTCACAAATAGG	GTGACATTCTCCAAACTGTG
e210430	e210430	PK	CPAR2_210430	cpar2_210430::StopTAG/cpar2_210430::StopTAG			2	This study (Lombardi, Salzberg, O'Cinneide, 1Set)	CCACAATTGGGTGCCAACAAATG	AACCATTTGTTGGCACCCAATTG	GCAGACCTATACATAAGCGC	CACATATTTCAAAAGCCTGTTGCCCCACATTAGATAGATAGGCAGACCTATACATA	TTTCTCTGAGATCCAATTGGGTGCCAACAAGCGCTTATGTATAGGTCTGCCTATC	CTTGGCTTTGTCCATAATGG	CACCACTTTCACCACTTATC
e211110	e211110	PK	CPAR2_211110	cpar2_211110::StopTAG/cpar2_211110::StopTAG			2	This study (Lombardi, Salzberg, O'Cinneide, 1Set)	CCAAGCTGCCGGTACATATGGTA	AACTACCATATGTACCGGCAGCT	GCATCGGACCTCAGTTTACT	TTTTGGGCTATATAGCTGCCGGTACATATGTAGATAGATAGGCATCGGACCTCAGT	TTGTTCGAAGTTTGGCTTTGTAAACCTTACAGTAAACTGAGGTCCGATGCCTATC	GCCTTGACAAATACGTTACC	CTCGACATAGTGACATTTCC
e211130	e211130	PK	CPAR2_211130	cpar2_211130::StopTAG/cpar2_211130::StopTAG			1	This study (Lombardi, Salzberg, O'Cinneide, 1Set)	CCAGTGGTACCGATGATTATTAC	AACGTAATAATCATCGGTACCAC	GCATCTCAGAAATCGGCACA	AATCAGGGACATGGTGGTACCGATGATTATTAGATAGATAGGCATCTCAGAAATCG	TCTAGAAATTGGTTGATTTTTGTTCCAGTATGTGCCGATTTCTGAGATGCCTATC	CAAGAGAGACAGGAATTACG	CAATACCTCCTTCTTCCTTG
e211250	e211250	PK	CPAR2_211250	cpar2_211250::StopTAG/cpar2_211250::StopTAG			2	This study (Lombardi, Salzberg, O'Cinneide, 1Set)	CCAAAATTATGACTATTTAGCTG	AACCAGCTAAATAGTCATAATTT	ATCGAACGTGTGTCAAACGC	GGATCCAATAGTGAGGCAACCTTACCACAGTAGATAGATAGATCGAACGTGTGTCA	ATTCAAGTTACTCAAATTATGACTATTTAGGCGTTTGACACACGTTCGATCTATC	GGCAAATTAGGAGACCGATT	CCTTGTCCCAGTGATATTTG
e212760	e212760	PK	CPAR2_212760	cpar2_212760::StopTAG/cpar2_212760::StopTAG			2	This study (Lombardi, Salzberg, O'Cinneide, 1Set)	CCATATCGGGACAGAAGTATTCG	AACCGAATACTTCTGTCCCGATA	GCCTACTAACTAATGAGAGC	GCACCGGAATTGTTATCGGGACAGAAGTATTAGATAGATAGGCCTACTAACTAATG	TAAAGACCATACATCAATTGCAAACCCCGAGCTCTCATTAGTTAGTAGGCCTATC	CGATTGGAATTGAACGAGTG	GAAAGGATTGACTCACCATC
e300490	e300490	PK	CPAR2_300490	cpar2_300490::StopTAG/cpar2_300490::StopTAG			1	This study (Lombardi, Salzberg, O'Cinneide, 1Set)	CCAGTTGTGTAGCTGTTCTAAAA	AACTTTTAGAACAGCTACACAAC	ATCTCGCGTGACGATAGGCT	GAATATGGCTATTGAACTTGATTCCCGTTTTAGATAGATAGATCTCGCGTGACGAT	GAACAAAACCAGAGTTGTGTAGCTGTTCTAAGCCTATCGTCACGCGAGATCTATC	GAAGGAAGTTCAAGAGTTGG	GCATCTTTACCCACAACTAG
e301160	e301160	PK	CPAR2_301160	cpar2_301160::StopTAG/cpar2_301160::StopTAG			2	This study (Lombardi, Salzberg, O'Cinneide, 1Set)	CCAGGTGGTAGCGGTGATGACAG	AACCTGTCATCACCGCTACCACC	ATGCAGACTTCCAGATGGTG	AAGAGTGCAAATCATCCATCGCCACCACTGTAGATAGATAGATGCAGACTTCCAGA	TGGTGGCGGTGGTGGTGGTAGCGGTGATGACACCATCTGGAAGTCTGCATCTATC	GAACGACTACTACAAGCTTC	CCTCTGGGGTAAAATGTTAG
e301570	e301570	PK	CPAR2_301570	cpar2_301570::StopTAG/cpar2_301570::StopTAG			2	This study (Lombardi, Salzberg, O'Cinneide, 1Set)	CCAATTGACAATCAATCAGATGG	AACCCATCTGATTGATTGTCAAT	ATGTACGCACGACCAGTGTC	TTTTAAATTTGAAATTGACAATCAATCAGATAGATAGATAGATGTACGCACGACCA	CCGAAGCGAATTTCAACAATCGATCCACCAGACACTGGTCGTGCGTACATCTATC	GAGGAGATTTATCCCGGAAA	ACCATTGATACCCACATCTC
e301780	e301780	PK	CPAR2_301780	cpar2_301780::StopTAG/cpar2_301780::StopTAG			2	This study (Lombardi, Salzberg, O'Cinneide, 1Set)	CCAGGATGTTCTTGACTCGTTCG	AACCGAACGAGTCAAGAACATCC	ATGTGTATGCCACTACCGCG	TGGTTCAAAAAGAGGATGTTCTTGACTCGTTAGATAGATAGATGTGTATGCCACTA	AGGCGTCGTCTATAGTATCGGTTGCCTCGACGCGGTAGTGGCATACACATCTATC	CAAGAAAGAGAGAGAGAGAG	CCTGACAAGAAGTACCTTAC
e302540	e302540	PK	CPAR2_302540	cpar2_302540::StopTAG/cpar2_302540::StopTAG			2	This study (Lombardi, Salzberg, O'Cinneide, 1Set)	CCAGGGTGTTGTTGAAACGATAG	AACCTATCGTTTCAACAACACCC	ATTCTCCGGCGAGTGTCTGT	TCATTACAGAACCTTCTTGGAGAACCACTATAGATAGATAGATTCTCCGGCGAGTG	ACTGTTGTCACCCGGGTGTTGTTGAAACGAACAGACACTCGCCGGAGAATCTATC	GTTCTCTTCATCTTCGTCTC	GGTGATTCTAAGCTACTTGG
e403060	e403060	PK	CPAR2_403060	cpar2_403060::StopTAG/cpar2_403060::StopTAG			2	This study (Lombardi, Salzberg, O'Cinneide, 1Set)	CCATGAAGATATCATGCAGTTTG	AACCAAACTGCATGATATCTTCA	TATTCAGGTACACCCGCTGG	TTGAGCAGTTGATTGAAGATATCATGCAGTTAGATAGATAGTATTCAGGTACACCC	TCCTTGTGGAGCCATCGTAGTTCACCTCAACCAGCGGGTGTACCTGAATACTATC	GGATACTACTGATGATCCTG	CATCAATCTCTCTGCTAGTG
e404320	e404320	PK	CPAR2_404320	cpar2_404320::StopTAG/cpar2_404320::StopTAG			2	This study (Lombardi, Salzberg, O'Cinneide, 1Set)	CCATGCGGAGCTTCGCACTTCCT	AACAGGAAGTGCGAAGCTCCGCA	AAAGGAATCTGTCTCAACGC	CAACAAGTTGCAATCAAGTTCGAGCCGAGGTAGATAGATAGAAAGGAATCTGTCTC	TTCGTCTCGTAATTGCGGAGCTTCGCACTTGCGTTGAGACAGATTCCTTTCTATC	CACCAACTCAGTCTCAATAC	CCACTAAGAGCTTTCTTCTC
e405490	e405490	PK	CPAR2_405490	cpar2_405490::StopTAG/cpar2_405490::StopTAG			2	This study (Lombardi, Salzberg, O'Cinneide, 1Set)	CCATGCTGCCGAAAGTTTGACCC	AACGGGTCAAACTTTCGGCAGCA	TCGGAGACTGCCTGCATACT	TTGTGAGAAATATGAGATCAGTAACCGGGGTAGATAGATAGTCGGAGACTGCCTGC	GAATTTTGTAATATGCTGCCGAAAGTTTGAAGTATGCAGGCAGTCTCCGACTATC	GGGTATCTATCTGTCATTGC	CTTGGATCTAGGAATTCTCG
e406290	e406290	PK	CPAR2_406290	cpar2_406290::StopTAG/cpar2_406290::StopTAG			2	This study (Lombardi, Salzberg, O'Cinneide, 1Set)	CCAGCATGATGGAGGGAGATTAC	AACGTAATCTCCCTCCATCATGC	TGACACGGATGCAAGACCAC	TATTGTGACGTGAGAATAGACAACCCTGTATAGATAGATAGTGACACGGATGCAAG	TGACCATATCGTAGCATGATGGAGGGAGATGTGGTCTTGCATCCGTGTCACTATC	CTCTTCCACCATCCCTTTAG	GAAAAGATCTCCACCACATG
e406480	e406480	PK	CPAR2_406480	cpar2_406480::StopTAG/cpar2_406480::StopTAG			2	This study (Lombardi, Salzberg, O'Cinneide, 1Set)	CCATTACTCACGGTTGATCTTTG	AACCAAAGATCAACCGTGAGTAA	TGACTATACACAGATGTCCC	GAGGCAATTCAAAGATCTTTGCTACCACAATAGATAGATAGTGACTATACACAGAT	AGAATACTTTCCTTTACTCACGGTTGATCTGGGACATCTGTGTATAGTCACTATC	CAAGACAAGTCAATGGAGTC	CGTGGCTATGTAAGTACTCT
e406540	e406540	PK	CPAR2_406540	cpar2_406540::StopTAG/cpar2_406540::StopTAG			2	This study (Lombardi, Salzberg, O'Cinneide, 1Set)	CCATCCGTCGCTGAAGTGTATGG	AACCCATACACTTCAGCGACGGA	TGAGAAACCTAACGGGTGTC	ATGAAGAGGGTGAACCCAAGTAATCCTCCATAGATAGATAGTGAGAAACCTAACGG	TCCAAATGGATTTTCCGTCGCTGAAGTGTAGACACCCGTTAGGTTTCTCACTATC	CTTCCTTCTCCTATCATCTC	TTGATAGCAACCTCCTTACC
e407630	e407630	PK	CPAR2_407630	cpar2_407630::StopTAG/cpar2_407630::StopTAG			2	This study (Lombardi, Salzberg, O'Cinneide, 1Set)	CCAGCACTATTCTCACCTTCTCC	AACGGAGAAGGTGAGAATAGTGC	TGCGAGCGACTACTTGGCAT	AATCCCCAGATCAGCACTATTCTCACCTTCTAGATAGATAGTGCGAGCGACTACTT	TTGGTTTGTTGGTGAGAAATATAGCCTGGAATGCCAAGTAGTCGCTCGCACTATC	TAGTGACCCCACACAATATC	CTTGTGAGGATTGGTTGTTC
e407810	e407810	PK	CPAR2_407810	cpar2_407810::StopTAG/cpar2_407810::StopTAG			2	This study (Lombardi, Salzberg, O'Cinneide, 1Set)	CCATTGCTGTTGGTCTTGTGGAG	AACCTCCACAAGACCAACAGCAA	TGCTGACACCAAGGACCAGA	TTGGATCCACGTCGGTGCCAGTGTCCCCTCTAGATAGATAGTGCTGACACCAAGGA	TGATGAGTTTGAATTGCTGTTGGTCTTGTGTCTGGTCCTTGGTGTCAGCACTATC	CTTAGACCAGTTGAGAAAGG	CCCGAGGTTGTAAAAATCCT
e500180	e500180	PK	CPAR2_500180	cpar2_500180::StopTAG/cpar2_500180::StopTAG			1	This study (Lombardi, Salzberg, O'Cinneide, 1Set)	CCATACATGGAGTACTGTTCAGG	AACCCTGAACAGTACTCCATGTA	GGGTAGCACACAATCAGCCA	AACTATTCATATATACATGGAGTACTGTTCTAGATAGATAGGGGTAGCACACAATC	TCCTTGATTAATTGAGATAAATCACCCCCTTGGCTGATTGTGTGCTACCCCTATC	GTTCACTAGAATACCCGACT	GTACAAGACACAACCTAGAG
e502210	e502210	PK	CPAR2_502210	cpar2_502210::StopTAG/cpar2_502210::StopTAG			1	This study (Lombardi, Salzberg, O'Cinneide, 1Set)	CCACGTATCTTGAATGAGGTACA	AACTGTACCTCATTCAAGATACG	GTGGAGAACGGAACCTAACC	GAATGATGATTATTCGCGTACTACCCTTGTTAGATAGATAGGTGGAGAACGGAACC	GTGTGGTATCATCCGTATCTTGAATGAGGTGGTTAGGTTCCGTTCTCCACCTATC	GTGAAGAGTACCACAGAATC	CCCAATACCAGGAGAAACTT
e502720	e502720	PK	CPAR2_502720	cpar2_502720::StopTAG/cpar2_502720::StopTAG			2	This study (Lombardi, Salzberg, O'Cinneide, 1Set)	CCAAATGGTGAAAAGATGGATCG	AACCGATCCATCTTTTCACCATT	TAAGAGTGGACAACTGCTGA	TGGAGTCTATGTTAATGGTGAAAAGATGGATAGATAGATAGTAAGAGTGGACAACT	CCCGTTTTCAAAACAACACTGGAACCACGATCAGCAGTTGTCCACTCTTACTATC	GTTTCAGTCCACTATGTCAC	GGTTCGATATAATGCCCAAC
e503290	e503290	PK	CPAR2_503290	cpar2_503290::StopTAG/cpar2_503290::StopTAG			1	This study (Lombardi, Salzberg, O'Cinneide, 1Set)	CCATCACTGCCCTTTGCCCATTG	AACCAATGGGCAAAGGGCAGTGA	TACAGTGACGAACAGCCGAC	GGATACATCAACAAACGGTACCTACCGCAATAGATAGATAGTACAGTGACGAACAG	TAATTGGACCCTTTCACTGCCCTTTGCCCAGTCGGCTGTTCGTCACTGTACTATC	CGGGTCAGTATGCAAATAAG	GACTCTTGTTGCTTCTTCTC
e503350	e503350	PK	CPAR2_503350	cpar2_503350::StopTAG/cpar2_503350::StopTAG			2	This study (Lombardi, Salzberg, O'Cinneide, 1Set)	CCATGATGATGTTTGGTTAATCA	AACTGATTAACCAAACATCATCA	TACATGGCTACAGAGTCCAG	ACCAATCGAGCACCGCCCTAGCTACCATGATAGATAGATAGTACATGGCTACAGAG	TGGCAAGTAATTGTGATGATGTTTGGTTAACTGGACTCTGTAGCCATGTACTATC	CCGTTCCATCAAATACTACC	CTAATCCAAGACCATGCAAG
e601870	e601870	PK	CPAR2_601870	cpar2_601870::StopTAG/cpar2_601870::StopTAG			2	This study (Lombardi, Salzberg, O'Cinneide, 1Set)	CCACAAGTGCAGTAATACAAAAA	AACTTTTTGTATTACTGCACTTG	AAGCTGTGATAACTGTGCAG	AAATATCTCGGCAACAATTGGAGTCCTTTTTAGATAGATAGAAGCTGTGATAACTG	TGTCTTCCTCGATCAAGTGCAGTAATACAACTGCACAGTTATCACAGCTTCTATC	TATCTTGGCTAGGAAGATCG	CTACTTTCTCTGACTTCGGA
e602180	e602180	PK	CPAR2_602180	cpar2_602180::StopTAG/cpar2_602180::StopTAG			2	This study (Lombardi, Salzberg, O'Cinneide, 1Set)	CCAGACCTAACCATCCATCCTTG	AACCAAGGATGGATGGTTAGGTC	AAGTCTCAGTAAGGTTGCAG	GTCTAATCAATCAACCAATGGGATCCACAATAGATAGATAGAAGTCTCAGTAAGGT	TTAATTGCAAATGGACCTAACCATCCATCCCTGCAACCTTACTGAGACTTCTATC	CTCAAGGAGTATACGTTACC	CATCCCAAACCCCATATATC
e602810	e602810	PK	CPAR2_602810	cpar2_602810::StopTAG/cpar2_602810::StopTAG			2	This study (Lombardi, Salzberg, O'Cinneide, 1Set)	CCATATGGAGGGTATAAATGATC	AACGATCATTTATACCCTCCATA	AATCGAAGTCTCCTGAATCG	TTTTGTATGAATTTATGGAGGGTATAAATGTAGATAGATAGAATCGAAGTCTCCTG	TCTTGTTTTCTGGTGTGAAGTATTCCCGATCGATTCAGGAGACTTCGATTCTATC	GACCTATTCAGTTTAGGGTG	CAACTTTTGCTGACACATGC
e603510	e603510	PK	CPAR2_603510	cpar2_603510::StopTAG/cpar2_603510::StopTAG			2	This study (Lombardi, Salzberg, O'Cinneide, 1Set)	CCAGTTCTCTCCCAACAATTTGG	AACCCAAATTGTTGGGAGAGAAC	AATTAGGTTGCCCAGCCCTG	ATTTAAAGATTACTGATTTTGGAGCCGCCATAGATAGATAGAATTAGGTTGCCCAG	CTCCATCTTCTTCGTTCTCTCCCAACAATTCAGGGCTGGGCAACCTAATTCTATC	CAAGGTATTGTCCAAGAGAC	TCAGGTATAGTTGGTCGATC
e700710	e700710	PK	CPAR2_700710	cpar2_700710::StopTAG/cpar2_700710::StopTAG			2	This study (Lombardi, Salzberg, O'Cinneide, 1Set)	CCATGTCTTGAAATGTGAAATAA	AACTTATTTCACATTTCAAGACA	GCTATGTCACGACTTTCCAT	GAGTAATAGAATGGGGATCATTTCCCTTTATAGATAGATAGGCTATGTCACGACTT	TATAGCGAATCTTTGTCTTGAAATGTGAAAATGGAAAGTCGTGACATAGCCTATC	CATAATTGGAGGGAAGAAGG	CCATATATCACCTGGCTTTC
e700800	e700800	PK	CPAR2_700800	cpar2_700800::StopTAG/cpar2_700800::StopTAG			2	This study (Lombardi, Salzberg, O'Cinneide, 1Set)	CCACGACGTGACGATGATGAGGC	AACGCCTCATCATCGTCACGTCG	CGAGAGATGGTACACTATTG	GTCAAGGTCAACGACTATTCATCACCTGCCTAGATAGATAGCGAGAGATGGTACAC	GTTGCCCTCAACTCGACGTGACGATGATGACAATAGTGTACCATCTCTCGCTATC	GATAAGACCTCCTCTAGTGA	GTTTCCTATTCTTTGACGGG
e701900	e701900	PK	CPAR2_701900	cpar2_701900::StopTAG/cpar2_701900::StopTAG			2	This study (Lombardi, Salzberg, O'Cinneide, 1Set)	CCAGAACGAATATCGGTCAATTC	AACGAATTGACCGATATTCGTTC	GGAGACTATCCACAGACTGC	ATCCCCCCCTCCAGTATGTCCGCTCCTGAATAGATAGATAGGGAGACTATCCACAG	CAAGTTGATTGGCGAACGAATATCGGTCAAGCAGTCTGTGGATAGTCTCCCTATC	GGGCTACTTTACTTGGTATG	GATAACTCCTTCATCCTCAC
e702250	e702250	PK	CPAR2_702250	cpar2_702250::StopTAG/cpar2_702250::StopTAG			2	This study (Lombardi, Salzberg, O'Cinneide, 1Set)	CCAAGTTGGGTTGCTGGGTTTGT	AACACAAACCCAGCAACCCAACT	GGATCATACTCAATGCCTAC	TGTGAAAATTATTGAAAGTTTGGCCCTACATAGATAGATAGGGATCATACTCAATG	TGTTGCAGATACAAGTTGGGTTGCTGGGTTGTAGGCATTGAGTATGATCCCTATC	GGCACAAGGGATATTGATTC	GCTGGAAGGAGGATTTATAG
e702870	e702870	PK	CPAR2_702870	cpar2_702870::StopTAG/cpar2_702870::StopTAG			2	This study (Lombardi, Salzberg, O'Cinneide, 1Set)	CCAAATGTAAGGGGTCTTGGTAT	AACATACCAAGACCCCTTACATT	GGCATCACTCAACAGCAGTA	AGATTAAAAATTACCATCGGTTCGCCAATATAGATAGATAGGGCATCACTCAACAG	CAATTGACTGAACAATGTAAGGGGTCTTGGTACTGCTGTTGAGTGATGCCCTATC	TGTATCCCATCCCTATCTAC	GAACCCAAGTCTACCAATAC
e703650	e703650	PK	CPAR2_703650	cpar2_703650::StopTAG/cpar2_703650::StopTAG			2	This study (Lombardi, Salzberg, O'Cinneide, 1Set)	CCAGGAAATTCTGGGCGCATTTG	AACCAAATGCGCCCAGAATTTCC	GGCTCACTAACAAGGGCACA	GGAAAATGGTTGAGTCAACTACCACCGCAATAGATAGATAGGGCTCACTAACAAGG	TTTTATCGAATTTGGAAATTCTGGGCGCATTGTGCCCTTGTTAGTGAGCCCTATC	CTCGCTGAGACATTAAAGAG	CACGATGGCTGATACCTTTA
e704220	e704220	PK	CPAR2_704220	cpar2_704220::StopTAG/cpar2_704220::StopTAG			2	This study (Lombardi, Salzberg, O'Cinneide, 1Set)	CCAATTCTGCGTCATCTATGCAG	AACCTGCATAGATGACGCAGAAT	GGGCACCCGAAATACTCTAA	GTGTCTTCTACAAATTCTGCGTCATCTATGTAGATAGATAGGGGCACCCGAAATAC	TCTAGGGTCTATATACGAAGTCGGCCTCTGTTAGAGTATTTCGGGTGCCCCTATC	CTCCTTCAGTAAATGCTTCC	CTTCTAGCTATTGGTCTTGG
e800090	e800090	PK	CPAR2_800090	cpar2_800090::StopTAG/cpar2_800090::StopTAG			2	This study (Lombardi, Salzberg, O'Cinneide, 1Set)	CCAATTCACCAGTCAATGGATTG	AACCAATCCATTGACTGGTGAAT	AGATTAGTTCAAGCGCCCGC	TTGTCTTTACGACTTGGATATTATCCCCAATAGATAGATAGAGATTAGTTCAAGCG	TAAATTTCATTAAATTCACCAGTCAATGGAGCGGGCGCTTGAACTAATCTCTATC	AGTATACTATGGCAGGTCAG	CCTCGAAAAATTGGCTTACC
e800460	e800460	PK	CPAR2_800460	cpar2_800460::StopTAG/cpar2_800460::StopTAG			2	This study (Lombardi, Salzberg, O'Cinneide, 1Set)	CCATTAGATTACATTGTTGCTCA	AACTGAGCAACAATGTAATCTAA	CACTCCTTGGAACTTATTGC	AGGTGGACAAATGTTAGATTACATTGTTGCTAGATAGATAGCACTCCTTGGAACTT	CTTGCATGCTTTTCTTTCAAAGAGCCGTGAGCAATAAGTTCCAAGGAGTGCTATC	GTCAAGATTATACCACGAGC	CGGATACTCTACATTACCCT
e800700	e800700	PK	CPAR2_800700	cpar2_800700::StopTAG/cpar2_800700::StopTAG			2	This study (Lombardi, Salzberg, O'Cinneide, 1Set)	CCATGGTCGTAAATGATGACACA	AACTGTGTCATCATTTACGACCA	CACTTATTGAAAGCTCCCGA	TGTACCAAGTGACGATTGGTGTTGCCATGTTAGATAGATAGCACTTATTGAAAGCT	GATGTATAAGTGGTGGTCGTAAATGATGACTCGGGAGCTTTCAATAAGTGCTATC	GAAGTGGATGCTATGAGAAG	CTCAATTCTCCCAACAACTG
e801360	e801360	PK	CPAR2_801360	cpar2_801360::StopTAG/cpar2_801360::StopTAG			2	This study (Lombardi, Salzberg, O'Cinneide, 1Set)	CCATTTGGATTTGTAAATTCATG	AACCATGAATTTACAAATCCAAA	AATTTCCGCGAAGCGTGAGC	CATCATTAGTGATTTTGGATTTGTAAATTCTAGATAGATAGAATTTCCGCGAAGCG	TTCATAAGATCATTACTTTTGTCACCACATGCTCACGCTTCGCGGAAATTCTATC	CCCGAATATTGTCAACTTGG	CCTCTTATTGTATACGGGTG
e801470	e801470	PK	CPAR2_801470	cpar2_801470::StopTAG/cpar2_801470::StopTAG			1	This study (Lombardi, Salzberg, O'Cinneide, 1Set)	CCACAACGAGCTGAAGCTGCTAT	AACATAGCAGCTTCAGCTCGTTG	CAGCGGTTGCTCACTGTTGT	TTTGAACTCCAGTCAACGAGCTGAAGCTGCTAGATAGATAGCAGCGGTTGCTCACT	AGAACTGGAAACACCAATTGAAACCCAATAACAACAGTGAGCAACCGCTGCTATC	CTCAAGCGATATCTACAGTC	GTAATTGAGTTATCGGTCGG
e802210	e802210	PK	CPAR2_802210	cpar2_802210::StopTAG/cpar2_802210::StopTAG			2	This study (Lombardi, Salzberg, O'Cinneide, 1Set)	CCATTGGCATAATCATGCAAAGA	AACTCTTTGCATGATTATGCCAA	CATAGAGTTCGAGACAGCCG	ATTAAAACCATGAAGAAAAAGCTTCCATCTTAGATAGATAGCATAGAGTTCGAGAC	GATTTCTTTCACTTTGGCATAATCATGCAACGGCTGTCTCGAACTCTATGCTATC	ACCTTCTGTCACTATCTTCC	GTAGTCTCCCAACTTGATGA
e804640	e804640	PK	CPAR2_804640	cpar2_804640::StopTAG/cpar2_804640::StopTAG			1	This study (Lombardi, Salzberg, O'Cinneide, 1Set)	CCAAAAATGCATTTAACCAATCG	AACCGATTGGTTAAATGCATTTT	AGGTAATATACACTCACCGC	CTCAGTCAAGTCAAGCAATGAGTACCTCGATAGATAGATAGAGGTAATATACACTC	GGACATTTACTCGAAAATGCATTTAACCAAGCGGTGAGTGTATATTACCTCTATC	GAATATGAACGATCGCTCAC	CATATTGACTTGGGGTGAAG
e804940	e804940	PK	CPAR2_804940	cpar2_804940::StopTAG/cpar2_804940::StopTAG			2	This study (Lombardi, Salzberg, O'Cinneide, 1Set)	CCAGTCATCGGAGTCGTCACCAG	AACCTGGTGACGACTCCGATGAC	CCATCGTTCACAATCTAGGA	CGATTATTGAAAATGAGAACAACTCCACTGTAGATAGATAGCCATCGTTCACAATC	CATCGGCATCAAAGTCATCGGAGTCGTCACTCCTAGATTGTGAACGATGGCTATC	CAGACATATCCAGTGGAAAG	GTATCACTCCATACCTCTGA
e804950	e804950	PK	CPAR2_804950	cpar2_804950::StopTAG/cpar2_804950::StopTAG			2	This study (Lombardi, Salzberg, O'Cinneide, 1Set)	CCAGGTGTCGTCATTGCCTGAAG	AACCTTCAGGCAATGACGACACC	AACTACTATGAAGCGGGAGC	ACGGCACTACCGGACAAAACATTTCCACTTTAGATAGATAGAACTACTATGAAGCG	TGGGTATGCTTTTGGTGTCGTCATTGCCTGGCTCCCGCTTCATAGTAGTTCTATC	CTTTCTTCCCATATGGCATC	CACCCCCTTCTATATAATCC
e806320	e806320	PK	CPAR2_806320	CPAR2_806320::StopTAG/CPAR2_806320::StopTAG			2	This study (Lombardi, Salzberg, O'Cinneide, 2Set)	CCAGAACCTGATCAAGAGGGAAG	AACCTTCCCTCTTGATCAGGTTC	AATAGCCTTCAACGTCTAGC	TATCGACAGAAAAGAACCTGATCAAGAGGGTAGATAGATAGAATAGCCTTCAACGT	TCACCACCAACACCAGCATCACCTCCACTTGCTAGACGTTGAAGGCTATTCTATC	GTGTCTATGGTTGATGTGAG	CCCATCTGGCTGTTTAACTA
e806480	e806480	PK	CPAR2_806480	CPAR2_806480::StopTAG/CPAR2_806480::StopTAG			2	This study (Lombardi, Salzberg, O'Cinneide, 2Set)	CCAGGAGAGTCAGTGACTATTTC	AACGAAATAGTCACTGACTCTCC	CCGAGATGTCAAGAGACTTA	GCAGCGCCACTGCCACCACAAGTACCGGAATAGATAGATAGCCGAGATGTCAAGAG	ATCATGAGATTCTGGAGAGTCAGTGACTATTAAGTCTCTTGACATCTCGGCTATC	CAATAGAGAGCATGATACCC	GTGGTTCAAGATACGTGGAT
e806750	e806750	PK	CPAR2_806750	CPAR2_806750::StopTAG/CPAR2_806750::StopTAG			2	This study (Lombardi, Salzberg, O'Cinneide, 2Set)	CCAGAAGTAGTTGAATTCCTAAG	AACCTTAGGAATTCAACTACTTC	CCGATTCGACGTGACCTAAT	TCCAATTCTCAACTTGCGAATGTGCCCCTTTAGATAGATAGCCGATTCGACGTGAC	AATACCTCTACTTGAAGTAGTTGAATTCCTATTAGGTCACGTCGAATCGGCTATC	CCAAATGTGTCAATGGCATC	CGATAACTCATTGGGTGTAC
e808450	e808450	PK	CPAR2_808450	CPAR2_808450::StopTAG/CPAR2_808450::StopTAG			2	This study (Lombardi, Salzberg, O'Cinneide, 2Set)	CCAAAATGCATCATCGGCAGCTT	AACAAGCTGCCGATGATGCATTT	CCTATGTGTAGACAGAGTAG	ACAAACTTCAATCAAATGCATCATCGGCAGTAGATAGATAGCCTATGTGTAGACAG	GGAGTGATGGCTTAAACAAAGCTGCCAAAGCTACTCTGTCTACACATAGGCTATC	CATATGCTCATTTATCCCCC	TATCTCTGAAGTTGCTGCTG
e108840	e108840	PK	CPAR2_108840	CPAR2_108840::StopTAG/CPAR2_108840::StopTAG			2	This study (Lombardi, Salzberg, O'Cinneide, 2Set)	CCAGAGGATGGTCAAGTCAAGAT	AACATCTTGACTTGACCATCCTC	ATAGCGAGCTTGAACACCGC	CATTTTGCTAACTGAGGATGGTCAAGTCAATAGATAGATAGATAGCGAGCTTGAAC	ATTTCAGTGCTGACTCCAAAATCCCCAATCGCGGTGTTCAAGCTCGCTATCTATC	CGGTTAGGGAGATTCAGTTT	GAAATAGGCATTCTTCCTGG
e205070	e205070	PK	CPAR2_205070	CPAR2_205070::StopTAG/CPAR2_205070::StopTAG			2	This study (Lombardi, Salzberg, O'Cinneide, 2Set)	CCAGAGCGAGACACATTTGGTGA	AACTCACCAAATGTGTCTCGCTC	CTTCATAGTGTGACAGGGAT	GTTTCATCCATCCCATCAAGTAGACCATCATAGATAGATAGCTTCATAGTGTGACA	CTTTCTTGATGACGAGCGAGACACATTTGGATCCCTGTCACACTATGAAGCTATC	CTCACAAGTCATCACCTTTG	CTGGTGTGGTTCTTTACTTG
e208590	e208590	PK	CPAR2_208590	CPAR2_208590::StopTAG/CPAR2_208590::StopTAG			2	This study (Lombardi, Salzberg, O'Cinneide, 2Set)	CCAACTGTTCAAGTCACGATTAG	AACCTAATCGTGACTTGAACAGT	GATAGATGTCCATACACCTC	TGAGATTTTGTTTAACCATTGATCCCACTATAGATAGATAGGATAGATGTCCATAC	ACTCTTTGGAAACACTGTTCAAGTCACGATGAGGTGTATGGACATCTATCCTATC	GTTATATGGCCCCTGAGTTA	GTTCCTTTATTCACCTGAGC
e211370	e211370	PK	CPAR2_211370	CPAR2_211370::StopTAG/CPAR2_211370::StopTAG			1	This study (Lombardi, Salzberg, O'Cinneide, 2Set)	CCATGATGTCCTCCTGATGTCAT	AACATGACATCAGGAGGACATCA	GCCACAGGCACAAGTTATCA	GGACCAGACTCATTTGGTAAATCACCAATGTAGATAGATAGGCCACAGGCACAAGT	GCTGCTGCTGCTGTGATGTCCTCCTGATGTTGATAACTTGTGCCTGTGGCCTATC	CCAATCTCAACACTATCCAC	GACGATACTCTTTCTCCTAC
e401830	e401830	PK	CPAR2_401830	CPAR2_401830::StopTAG/CPAR2_401830::StopTAG			2	This study (Lombardi, Salzberg, O'Cinneide, 2Set)	CCAGATCTGGAGATACCTTGTTG	AACCAACAAGGTATCTCCAGATC	TATATTGGACCCAGCGGCAG	AAATGACTGCAGTGATCTGGAGATACCTTGTAGATAGATAGTATATTGGACCCAGC	CGAGGTGCGCCTCCACTTTGTCGTCCACAACTGCCGCTGGGTCCAATATACTATC	CAAGACAAGTAGCATCAGTG	CCATCATTGTCATCATCCTC
e700280	e700280	PK	CPAR2_700280	CPAR2_700280::StopTAG/CPAR2_700280::StopTAG			2	This study (Lombardi, Salzberg, O'Cinneide, 2Set)	CCATGATGGTCTTTACTGCTTCC	AACGGAAGCAGTAAAGACCATCA	GCGTATATGGGATCTGACTT	ACGTCAAGCCATATGATGGTCTTTACTGCTTAGATAGATAGGCGTATATGGGATCT	TTGCTAAATCAAGGTCCGCTAACTCCTGGAAAGTCAGATCCCATATACGCCTATC	CAGATACGAGATTATCAGGG	CCCAAGTATACATCCCATAG
e202000	e202000	TF	CPAR2_202000	CPAR2_202000::StopTAG/CPAR2_202000::StopTAG			2	This study (Lombardi, Salzberg, O'Cinneide, 2Set)	CCAGATGATGCCAGGGTCGACTT	AACAAGTCGACCCTGGCATCATC	CGCTGATAGTTAGCTGGATT	AAGCTAAGGAAGAAACCATCCAAACCAAAGTAGATAGATAGCGCTGATAGTTAGCT	AGAAGAGTCATAAGATGATGCCAGGGTCGAAATCCAGCTAACTATCAGCGCTATC	CATAACTTCACCTACTGCTG	CTTTCTCGACTCTCCATTTC
e207470	e207470	TF	CPAR2_207470	CPAR2_207470::StopTAG/CPAR2_207470::StopTAG			2	This study (Lombardi, Salzberg, O'Cinneide, 2Set)	CCATCAGGCAAATTCGTAGCCAG	AACCTGGCTACGAATTTGCCTGA	GAGCCCTGCTTGGTCACTTT	AGAGAGTTTCTTGACGTCACGTACCCTCTGTAGATAGATAGGAGCCCTGCTTGGTC	CAAAGATTCGAGTTCAGGCAAATTCGTAGCAAAGTGACCAAGCAGGGCTCCTATC	CGAGTTCACACTCTTTCTTC	CTGCTCTCGAATACTCTAAC
e210200	e210200	TF	CPAR2_210200	CPAR2_210200::StopTAG/CPAR2_210200::StopTAG			1	This study (Lombardi, Salzberg, O'Cinneide, 2Set)	CCATATCGCAACGTCCATTGCTC	AACGAGCAATGGACGTTGCGATA	GCACGTATGTTAATCTGTGG	AGCAGACTCCAAGTATCGCAACGTCCATTGTAGATAGATAGGCACGTATGTTAATC	GTTTTCCTGATGCCAACGTAATACCCTGAGCCACAGATTAACATACGTGCCTATC	GCTTGTACTGTCTGTAGATC	CCAAACTACTATCGGGTAAG
e211180	e211180	TF	CPAR2_211180	CPAR2_211180::StopTAG/CPAR2_211180::StopTAG			2	This study (Lombardi, Salzberg, O'Cinneide, 2Set)	CCAGCAGGTACTGAAAACAATGA	AACTCATTGTTTTCAGTACCTGC	GCATGGCAGCAAGCAGCATA	TATATCAAGCGACGCAGGTACTGAAAACAATAGATAGATAGGCATGGCAGCAAGCA	TTTGTGGTGGATATGTTATTTCCCCCATCATATGCTGCTTGCTGCCATGCCTATC	GACAACTGGAAATACACCTC	ACCAGCGACTATAGATCTAC
e404560	e404560	TF	CPAR2_404560	CPAR2_404560::StopTAG/CPAR2_404560::StopTAG			2	This study (Lombardi, Salzberg, O'Cinneide, 2Set)	CCAAGGCGGTGGAAGAAGGTACG	AACCGTACCTTCTTCCACCGCCT	TCCACTAGCGACTGGCAGAT	TTGCATCAAGACCAGGCGGTGGAAGAAGGTTAGATAGATAGTCCACTAGCGACTGG	CTGTTTCATCGGGACGATCAATATCCTCGTATCTGCCAGTCGCTAGTGGACTATC	GTAAGTCAGACTGGTAGTAC	GAAGTGAGAAAAGTGTCCTG
e407160	e407160	TF	CPAR2_407160	CPAR2_407160::StopTAG/CPAR2_407160::StopTAG			2	This study (Lombardi, Salzberg, O'Cinneide, 2Set)	CCAAATGCAGCCGAGGTCGGTAA	AACTTACCGACCTCGGCTGCATT	TGATGTAGGACAGCCACCAG	CATGGATCTCCATTGGTTACATCGCCATTATAGATAGATAGTGATGTAGGACAGCC	GATGTTTGGTTGTAATGCAGCCGAGGTCGGCTGGTGGCTGTCCTACATCACTATC	CTAGCTTCTCCGTTTATCAG	GTTGTAGTTGTAGCATCCTC
e407920	e407920	TF	CPAR2_407920	CPAR2_407920::StopTAG/CPAR2_407920::StopTAG			2	This study (Lombardi, Salzberg, O'Cinneide, 2Set)	CCAAAAGGCAGTCTTACTGTTCT	AACAGAACAGTAAGACTGCCTTT	TGGAGAGCTTTCCGAATGAT	CATAAATGGTGTTGTTCATATTCACCGAGATAGATAGATAGTGGAGAGCTTTCCGA	ATGAGCTCTAGTTAAAGGCAGTCTTACTGTATCATTCGGAAAGCTCTCCACTATC	TTTGTAATCGACCGACACGC	GAGGAGGAAATGTTGAGAAC
e500570	e500570	TF	CPAR2_500570	CPAR2_500570::StopTAG/CPAR2_500570::StopTAG			2	This study (Lombardi, Salzberg, O'Cinneide, 2Set)	CCAAAGTGGAAAACAGCAAGTCA	AACTGACTTGCTGTTTTCCACTT	GGTCATGCCTGAGCTTCGTT	TTACAATATGCTCAAGTGGAAAACAGCAAGTAGATAGATAGGGTCATGCCTGAGCT	CTTATTCAATGCAATTAGGAAGTTCCTTGAAACGAAGCTCAGGCATGACCCTATC	GCGGGATTGTTAATGTACAG	CTCTTCCTCTAGACTCTCTT
e502700	e502700	TF	CPAR2_502700	CPAR2_502700::StopTAG/CPAR2_502700::StopTAG			1	This study (Lombardi, Salzberg, O'Cinneide, 2Set)	CCACTAGAATCAGTCACTGTCGT	AACACGACAGTGACTGATTCTAG	TAAGAGAGGTTACGACACCG	ACTACGTCTTCTTTATCTACTGCACCAACGTAGATAGATAGTAAGAGAGGTTACGA	TTTGCCGAATGAACTAGAATCAGTCACTGTCGGTGTCGTAACCTCTCTTACTATC	CAGTATATCAACCACTTCCC	CCTCCATTGTCACTATGTTG
e503760	e503760	TF	CPAR2_503760	CPAR2_503760::StopTAG/CPAR2_503760::StopTAG			2	This study (Lombardi, Salzberg, O'Cinneide, 2Set)	CCATTGATGGAGGAGCAGCCAAG	AACCTTGGCTGCTCCTCCATCAA	TACGTCTGACCATGCGTCTG	TTGCAAGCAGGTATTGATGGAGGAGCAGCCTAGATAGATAGTACGTCTGACCATGC	TTTCCTCTTGGCTTCGGCTTCTTTCCTCTTCAGACGCATGGTCAGACGTACTATC	GAAGTGGTAGATACACAGGA	CATTCTCCACTGCATCTATG
e600300	e600300	TF	CPAR2_600300	CPAR2_600300::StopTAG/CPAR2_600300::StopTAG			2	This study (Lombardi, Salzberg, O'Cinneide, 2Set)	CCAACTGTTGGTATGGATTCATT	AACAATGAATCCATACCAACAGT	AAATCATCGGGAGCATTGTG	TCTCCAGCACAACCCAGTCCACTACCTAATTAGATAGATAGAAATCATCGGGAGCA	TTGTAAGTTGGCAACTGTTGGTATGGATTCCACAATGCTCCCGATGATTTCTATC	ATCATGTTCGTATCCCTTGG	CTTGATGTAGTCGATGGGTA
e600840	e600840	TF	CPAR2_600840	CPAR2_600840::StopTAG/CPAR2_600840::StopTAG			2	This study (Lombardi, Salzberg, O'Cinneide, 2Set)	CCAAAACCACGCGATGATTCTCG	AACCGAGAATCATCGCGTGGTTT	AACCTACCTCGAATAGTGGC	TGGAATTAGAAAAAAACCACGCGATGATTCTAGATAGATAGAACCTACCTCGAATA	TCGTATCATCAGCATTATGAGTACCCACGAGCCACTATTCGAGGTAGGTTCTATC	CAGCCGGGTAAAGTACTTTA	GAGAGGTCGCTATAATCAAG
e602020	e602020	TF	CPAR2_602020	CPAR2_602020::StopTAG/CPAR2_602020::StopTAG			2	This study (Lombardi, Salzberg, O'Cinneide, 2Set)	CCACTTGGAGAGGCTGATCTTGT	AACACAAGATCAGCCTCTCCAAG	AAGGTCTCGGAATATGACTC	CCATCAACTCCCAATGATGCTGAACCAACATAGATAGATAGAAGGTCTCGGAATAT	TTCAAGAATACCACTTGGAGAGGCTGATCTGAGTCATATTCCGAGACCTTCTATC	CAGTATGCTGAAGAACCTAC	GAATCGTATGTGCTTCCTTG
e602290	e602290	TF	CPAR2_602290	CPAR2_602290::StopTAG/CPAR2_602290::StopTAG			2	This study (Lombardi, Salzberg, O'Cinneide, 2Set)	CCATGATCGATTGAAACAAAGTG	AACCACTTTGTTTCAATCGATCA	AATACACGGTACTCGATACG	AACAAGCATTAATTGATCGATTGAAACAAATAGATAGATAGAATACACGGTACTCG	CTGGGACATATTTGGCTTTCCTCTCCTCACCGTATCGAGTACCGTGTATTCTATC	GGGGAGTACAACTAGAGAAA	CCATTATAGCCCTCTGATAC
e602370	e602370	TF	CPAR2_602370	CPAR2_602370::StopTAG/CPAR2_602370::StopTAG			2	This study (Lombardi, Salzberg, O'Cinneide, 2Set)	CCAGGCCAAAGTTGGAATAACTG	AACCAGTTATTCCAACTTTGGCC	AATACTCCTTAACTGCGGCG	TAACAGACCCGTCTGATTTTAAAACCACAGTAGATAGATAGAATACTCCTTAACTG	AAACATCCAAATTGGCCAAAGTTGGAATAACGCCGCAGTTAAGGAGTATTCTATC	GAGGACTCATACCTAAGTTG	CTCCCTTAGCTTCTTAGAAC
e700930	e700930	TF	CPAR2_700930	CPAR2_700930::StopTAG/CPAR2_700930::StopTAG			2	This study (Lombardi, Salzberg, O'Cinneide, 2Set)	CCAATAGGTGGAAGCTGTGATTG	AACCAATCACAGCTTCCACCTAT	GCTCCAGAGACATATTGAGA	TCGACAAATGTTGGAAATACACAGCCGCAATAGATAGATAGGCTCCAGAGACATAT	ATTTAATCTCTGTATAGGTGGAAGCTGTGATCTCAATATGTCTCTGGAGCCTATC	GTAGGGTGTATGAGATACTG	GGTGTTTCTTCTCTCTGATC
e701050	e701050	TF	CPAR2_701050	CPAR2_701050::StopTAG/CPAR2_701050::StopTAG			2	This study (Lombardi, Salzberg, O'Cinneide, 2Set)	CCAAATGGTTGACCACCTCCTTC	AACGAAGGAGGTGGTCAACCATT	GCTCGCTAGATTGAGAGAAT	GAATTCGAGGATACAGTCTTGTTTCCAGAATAGATAGATAGGCTCGCTAGATTGAG	GGTACCTTTATCAAATGGTTGACCACCTCCATTCTCTCAATCTAGCGAGCCTATC	GGAACGGAATTATAGATGCG	GTCACTACATGGATTGGATG
e702200	e702200	TF	CPAR2_702200	CPAR2_702200::StopTAG/CPAR2_702200::StopTAG			2	This study (Lombardi, Salzberg, O'Cinneide, 2Set)	CCATCAGTTACCATCGATTTCGT	AACACGAAATCGATGGTAACTGA	GGATAGGATACACTACCCGC	AAAGAAAAGTTGCTCAGTTACCATCGATTTTAGATAGATAGGGATAGGATACACTA	TGAGAATCTTTTCTGCAAAGGTTTCCGACGGCGGGTAGTGTATCCTATCCCTATC	CATGATCTTGTTGGTTCCAC	CTTCATCAGATATTGGGTCC
e802280	e802280	TF	CPAR2_802280	CPAR2_802280::StopTAG/CPAR2_802280::StopTAG			2	This study (Lombardi, Salzberg, O'Cinneide, 2Set)	CCAGCTCGTGAAGAGATTCAGCA	AACTGCTGAATCTCTTCACGAGC	CATAGCGATGGACAGTCTAG	CTTTGAACGATTGGCTCGTGAAGAGATTCATAGATAGATAGCATAGCGATGGACAG	AATTCTTGCAAATTTTGATATTTCCCATGCCTAGACTGTCCATCGCTATGCTATC	CCGATAAGAATCCAGGAAAC	GTTTCAATAATCTCTGGCGG
e802630	e802630	TF	CPAR2_802630	CPAR2_802630::StopTAG/CPAR2_802630::StopTAG			2	This study (Lombardi, Salzberg, O'Cinneide, 2Set)	CCAGTCTTCGCTGATAGTTTCAG	AACCTGAAACTATCAGCGAAGAC	CATCACGGGCAAGGATTGTA	TTGTACCCCCACCAAGAAAAGCATCCACTGTAGATAGATAGCATCACGGGCAAGGA	TGTTGGCACTGTAGTCTTCGCTGATAGTTTTACAATCCTTGCCCGTGATGCTATC	GGTATACCAGTGGACACATT	GCAAGTGGATAATCTAGCTG
e803470	e803470	TF	CPAR2_803470	CPAR2_803470::StopTAG/CPAR2_803470::StopTAG			2	This study (Lombardi, Salzberg, O'Cinneide, 2Set)	CCAAATGGATGAAGTATTGTTTG	AACCAAACAATACTTCATCCATT	CATGGATATGAAGTTTCCGC	CTACAACTCCTTACGAGACAAGCACCACAATAGATAGATAGCATGGATATGAAGTT	TAAAAGGTTTACTAATGGATGAAGTATTGTGCGGAAACTTCATATCCATGCTATC	TTGTCACCAGCATCTTCATC	ATGTAGTTGCCATCTCCAGA
e805700	e805700	TF	CPAR2_805700	CPAR2_805700::StopTAG/CPAR2_805700::StopTAG			2	This study (Lombardi, Salzberg, O'Cinneide, 2Set)	CCACAATTCGTCCACATTGTTGG	AACCCAACAATGTGGACGAATTG	CCCGCGTGTCGATTAGGTTT	TGGATTCGTCTCCATATTCTGACTCCCCCATAGATAGATAGCCCGCGTGTCGATTA	AGTAACTAGAAAACAATTCGTCCACATTGTAAACCTAATCGACACGCGGGCTATC	GGTCGTAACCATAATCAACC	CGTAATCAGAACTATCGTGG
e806780	e806780	TF	CPAR2_806780	CPAR2_806780::StopTAG/CPAR2_806780::StopTAG		1 nt mismatch	2	This study (Lombardi, Salzberg, O'Cinneide, 2Set)	CCAATTTGGTTTGAAATGTGCTT	AACAAGCACATTTCAAACCAAAT	CCGCACACCAGAATGATTTA	GAGGTAATTGCAAATTTGGTTTGAAATGTGTAGATAGATAGCCGCACACCAGAATG	TAGTTCCATCAGGTAAATAGTGAGCCAAAGTAAATCATTCTGGTGTGCGGCTATC	GATCTCAGTTCATTAGGTGC	CTGTTAGAGAGTCGAAGGAA
e100020	e100020	Unknown Function	CPAR2_100020	CPAR2_100020::StopTAG/CPAR2_100020::StopTAG			2	This study (Lombardi, Salzberg, O'Cinneide, 2Set)	CCATGCAGGATTGACACTCGAAG	AACCTTCGAGTGTCAATCCTGCA	ACACAGGTCACATTAGGTGC	TGAGAAAACGCATTGCAGGATTGACACTCGTAGATAGATAGACACAGGTCACATTA	CGCCCTTTATTTCAGTCGCAAATTCCCCTTGCACCTAATGTGACCTGTGTCTATC	CCCTCGATAATGTCCTAATC	CTCTGACCAAACCATCTATC
e100070	e100070	Unknown Function	CPAR2_100070	CPAR2_100070::StopTAG/CPAR2_100070::StopTAG			2	This study (Lombardi, Salzberg, O'Cinneide, 2Set)	CCAGTGGTAAATCGCCTCAATCT	AACAGATTGAGGCGATTTACCAC	ACACCAGGACAAGTTTGCGA	ACTACAGTCGTATGTTTTTGGGCACCGAGATAGATAGATAGACACCAGGACAAGTT	CTACAACTGATGTGTGGTAAATCGCCTCAATCGCAAACTTGTCCTGGTGTCTATC	CTCAGATAAGGTACCCATAC	CCCACGATCTAGAAAAACTG
e100130	e100130	Unknown Function	CPAR2_100130	CPAR2_100130::StopTAG/CPAR2_100130::StopTAG			1	This study (Lombardi, Salzberg, O'Cinneide, 2Set)	CCAACTATGGCACAATTGTATGA	AACTCATACAATTGTGCCATAGT	ACACCTACACGATTAGTCAG	GTTTGAAACAATGACTATGGCACAATTGTATAGATAGATAGACACCTACACGATTA	TCACAACTGGGGATGGCAATATTACCATCACTGACTAATCGTGTAGGTGTCTATC	GATGAGGATTTCAATAGGGC	CTTGGTGATGATATCCCTTG
e100250	e100250	Unknown Function	CPAR2_100250	CPAR2_100250::StopTAG/CPAR2_100250::StopTAG			2	This study (Lombardi, Salzberg, O'Cinneide, 2Set)	CCAGCCCTTGTAACATGATATTG	AACCAATATCATGTTACAAGGGC	ACACGGAGTTAAGTATCACG	ATAAGATATGAGGTCACTGAAGAACCACAATAGATAGATAGACACGGAGTTAAGTA	TCCAATAAATAACGCCCTTGTAACATGATACGTGATACTTAACTCCGTGTCTATC
e100270	e100270	Unknown Function	CPAR2_100270	CPAR2_100270::StopTAG/CPAR2_100270::StopTAG			2	This study (Lombardi, Salzberg, O'Cinneide, 2Set)	CCAAGTGCTATTGACGCTTCCCC	AACGGGGAAGCGTCAATAGCACT	ACACGGTCCCGATGGCTATT	TGCAACGCGATGCCAGTAGACACCCCTGGGTAGATAGATAGACACGGTCCCGATGG	CTCATCGTCATCAAGTGCTATTGACGCTTCAATAGCCATCGGGACCGTGTCTATC	CCCCTCAAAATAAGTCACTG	GATCACGTTGGAGAATGATC
e100340	e100340	Unknown Function	CPAR2_100340	CPAR2_100340::StopTAG/CPAR2_100340::StopTAG		2 nt mismatch	2	This study (Lombardi, Salzberg, O'Cinneide, 2Set)	CCAAAACGTAGATTGGATAATGA	AACTCATTATCCAATCTACGTTT	ACACTCATGCAAGCGATGTA	ACAACTGATGTATCTACAGTAACACCATCATAGATAGATAGACACTCATGCAAGCG	TACTTCTGTGGCCAAACGTAGATTGGATAATACATCGCTTGCATGAGTGTCTATC	CAACTGGGGATATTTATCGC	TGATCCAACAACTTCACTGG
e100400	e100400	Unknown Function	CPAR2_100400	CPAR2_100400::StopTAG/CPAR2_100400::StopTAG			2	This study (Lombardi, Salzberg, O'Cinneide, 2Set)	CCAATGTTGACGCCACTTGTTCT	AACAGAACAAGTGGCGTCAACAT	ACACTGAGCTAATGCTAGAG	TCATATTTTGTACATGTTGACGCCACTTGTTAGATAGATAGACACTGAGCTAATGC	GGATGGGTTGAGTCTTTTGATTTTCCAAGACTCTAGCATTAGCTCAGTGTCTATC	CGTTTCTATAGTGGACCTTC	CTTGTAATAGTGTGGGTCTG
e100565	e100565	Unknown Function	CPAR2_100565	CPAR2_100565::StopTAG/CPAR2_100565::StopTAG			2	This study (Lombardi, Salzberg, O'Cinneide, 2Set)	CCAGTAGTCAGTACTACTTGCAG	AACCTGCAAGTAGTACTGACTAC	ACAGCGTTGAAAGTAGCTCA	CCATGACTACGAGAGGCCAAAAGACCACTGTAGATAGATAGACAGCGTTGAAAGTA	CTGGATCGCTAGAGTAGTCAGTACTACTTGTGAGCTACTTTCAACGCTGTCTATC	CGGTGTTATAGATTCTGGTG	GTTGTGTCTGTTGATTCTGG
e100730	e100730	Unknown Function	CPAR2_100730	CPAR2_100730::StopTAG/CPAR2_100730::StopTAG			2	This study (Lombardi, Salzberg, O'Cinneide, 2Set)	CCAGGATCACGGGGAATTTATGT	AACACATAAATTCCCCGTGATCC	ACAGTCCCTCTAAGTGATAG	CATGAAAAATGGTGGATCACGGGGAATTTATAGATAGATAGACAGTCCCTCTAAGT	GTTGCAAATTCAACAAACTCATCGCCAACACTATCACTTAGAGGGACTGTCTATC	GCTTAGTTACAGCCCTATAC	CCACTACATCAATACCTAGC
e100770	e100770	Unknown Function	CPAR2_100770	CPAR2_100770::StopTAG/CPAR2_100770::StopTAG			2	This study (Lombardi, Salzberg, O'Cinneide, 2Set)	CCAGGTGCAGTCTTTGGAGCAAC	AACGTTGCTCCAAAGACTGCACC	ACAGTGCTTAAAGGTTCGGA	TCATGAGTTCAAAAGCTTCTTGTTCCTGTTTAGATAGATAGACAGTGCTTAAAGGT	AGGTGTTATCACAGGTGCAGTCTTTGGAGCTCCGAACCTTTAAGCACTGTCTATC	CTACTGTACCGGATTTTACC	GGGTCTAAAATCCTTTCCAC
e100900	e100900	Unknown Function	CPAR2_100900	CPAR2_100900::StopTAG/CPAR2_100900::StopTAG			2	This study (Lombardi, Salzberg, O'Cinneide, 2Set)	CCAACTTGTTGAGAAATTGGGTG	AACCACCCAATTTCTCAACAAGT	ACATACTACTTAGGAGAGGG	GCGTGTTTACCGAACTTGTTGAGAAATTGGTAGATAGATAGACATACTACTTAGGA	ATAAGTCATTGATCTCGACATTTGCCACACCCCTCTCCTAAGTAGTATGTCTATC	GTGTAGCCTCATTGTAAGGA	CCATTCTTCATCACATACCC
e100920	e100920	Unknown Function	CPAR2_100920	CPAR2_100920::StopTAG/CPAR2_100920::StopTAG			2	This study (Lombardi, Salzberg, O'Cinneide, 2Set)	CCATTTAGATAACGAGTCTGTCG	AACCGACAGACTCGTTATCTAAA	ACATAGGTTTGAACGGTACG	ACGTCTTGACCCCTAGTGACTTGCCCACGATAGATAGATAGACATAGGTTTGAACG	CAGAAGAGCCAAATTTAGATAACGAGTCTGCGTACCGTTCAAACCTATGTCTATC	ATGTCTGTATGTACGGGATC	CTTCGATCCTCTGAAACAAC
e100950	e100950	Unknown Function	CPAR2_100950	CPAR2_100950::StopTAG/CPAR2_100950::StopTAG			2	This study (Lombardi, Salzberg, O'Cinneide, 2Set)	CCACGTGTGATGTACCAGAGAGT	AACACTCTCTGGTACATCACACG	ACATAGTGGTGAAGCTCTAG	TCTCATGTCATGACGTGTGATGTACCAGAGTAGATAGATAGACATAGTGGTGAAGC	AATGGACTTTTCTTTATCGAGTTTCCTACTCTAGAGCTTCACCACTATGTCTATC	CTCTCTTGTGTTCTTAGCAG	CAGGTTTTACTCATCCCATG
e101110	e101110	Unknown Function	CPAR2_101110	CPAR2_101110::StopTAG/CPAR2_101110::StopTAG			2	This study (Lombardi, Salzberg, O'Cinneide, 2Set)	CCAAAAGTCGGGTTGGAGAGTCT	AACAGACTCTCCAACCCGACTTT	ACATGAGGAGCAGTTTGCAT	ACCACACTGCTACTTTACATCATGCCTAGATAGATAGATAGACATGAGGAGCAGTT	GCGTTTGCAAGTCAAAGTCGGGTTGGAGAGATGCAAACTGCTCCTCATGTCTATC	GTTCGATTCTTATCTCGTCC	GGTTTAATCAAGATCCCACC
e101210	e101210	Unknown Function	CPAR2_101210	CPAR2_101210::StopTAG/CPAR2_101210::StopTAG			2	This study (Lombardi, Salzberg, O'Cinneide, 2Set)	CCAGTACGAATTGATCTAGCCAA	AACTTGGCTAGATCAATTCGTAC	ACATGGTCTAAACGCTTCGA	ATGTTTGCACGTCACATTTCTAAACCATTGTAGATAGATAGACATGGTCTAAACGC	TTCTGTTGCAAAAGTACGAATTGATCTAGCTCGAAGCGTTTAGACCATGTCTATC	GGCTTAGAACTGGAAATGGA	GAGGTCATTTTAGGTGATGG
e101300	e101300	Unknown Function	CPAR2_101300	CPAR2_101300::StopTAG/CPAR2_101300::StopTAG		1 nt mismatch	1	This study (Lombardi, Salzberg, O'Cinneide, 2Set)	CCACACGTGGCACAATCTCCAAC	AACGTTGGAGATTGTGCCACGTG	ACATTGGTTAAAGGCGCTGA	TTGGACAACAAATCACGTGGCACAATCTCCTAGATAGATAGACATTGGTTAAAGGC	AATAAGATGCAGCGTCGAATATAACCTGTTTCAGCGCCTTTAACCAATGTCTATC	CTCCATTTCCCAATATACCC	CCATAACTAAGCTACAGTCG
e101540	e101540	Unknown Function	CPAR2_101540	CPAR2_101540::StopTAG/CPAR2_101540::StopTAG			1	This study (Lombardi, Salzberg, O'Cinneide, 2Set)	CCACTTATATTGAGACTGCTGTG	AACCACAGCAGTCTCAATATAAG	ACCCTAGCGGCATTGATGTG	TGTTTTAGGTTCATACCACAATGGCCTCACTAGATAGATAGACCCTAGCGGCATTG	CTGCATTTGTAACCTTATATTGAGACTGCTCACATCAATGCCGCTAGGGTCTATC	GGCTATCTTCGTACATTGTC	ATTCCAAGTAACCTTCCGAG
e101740	e101740	Unknown Function	CPAR2_101740	CPAR2_101740::StopTAG/CPAR2_101740::StopTAG		1 nt mismatch	1	This study (Lombardi, Salzberg, O'Cinneide, 2Set)	CCAATTGAGGAGTACGTTAAAAG	AACCTTTTAACGTACTCCTCAAT	ACCGGACGGAGCTATATTTG	TCAAACCCAAAGTATTGAGGAGTACGTTAATAGATAGATAGACCGGACGGAGCTAT	ATATAAAATCCTTCCACCTTCAATCCGCTTCAAATATAGCTCCGTCCGGTCTATC	GGAGACAGAGAGCAAAATAG	TTCCCGAGATAGTAGTTTGC
e101770	e101770	Unknown Function	CPAR2_101770	CPAR2_101770::StopTAG/CPAR2_101770::StopTAG			2	This study (Lombardi, Salzberg, O'Cinneide, 2Set)	CCAAATCTTGGGCATCCGCCTGG	AACCCAGGCGGATGCCCAAGATT	ACCGTACCCAGAGATAGTAG	TTCCCACCATCATATGATACCTTACCACCATAGATAGATAGACCGTACCCAGAGAT	CTGAAGAACTGGGAATCTTGGGCATCCGCCCTACTATCTCTGGGTACGGTCTATC	CCGTCTTCATCTTCATCTTC	GAGTCGTTTTCTGGTATTCG
e101780	e101780	Unknown Function	CPAR2_101780	CPAR2_101780::StopTAG/CPAR2_101780::StopTAG		1 nt mismatch	2	This study (Lombardi, Salzberg, O'Cinneide, 2Set)	CCAGGTGGTGGTAACTGCTTACA	AACTGTAAGCAGTTACCACCACC	ACCGTCCTATCATCGTGTAT	TGCAACCATATTTGATTTTCAACGCCATGTTAGATAGATAGACCGTCCTATCATCG	AGGTGGTGGTGGTGGTGGTGGTAACTGCTTATACACGATGATAGGACGGTCTATC	CATGTTCTCTGAAGAGGATC	GATCGAGGTTGACTTTCATC
e101820	e101820	Unknown Function	CPAR2_101820	CPAR2_101820::StopTAG/CPAR2_101820::StopTAG			1	This study (Lombardi, Salzberg, O'Cinneide, 2Set)	CCAAGACTTGGAACGTGTCTGAG	AACCTCAGACACGTTCCAAGTCT	ACCTACGACCGATGGAGTTG	TTAAAGTAATCACTCGCGTCACTTCCACTCTAGATAGATAGACCTACGACCGATGG	TGAGCAGCACAGTAGACTTGGAACGTGTCTCAACTCCATCGGTCGTAGGTCTATC	GAAAAGGATGGCGTATAAGG	GAGATGATGCTGTAAGTTCG
e101890	e101890	Unknown Function	CPAR2_101890	CPAR2_101890::StopTAG/CPAR2_101890::StopTAG			2	This study (Lombardi, Salzberg, O'Cinneide, 2Set)	CCAAATGCGGTAAAGTTGACCTT	AACAAGGTCAACTTTACCGCATT	ACCTCGCTCGGGATGTGTTT	CCACCGTCATCACCAGACCCATCACCGAAGTAGATAGATAGACCTCGCTCGGGATG	GCAATAATTCCAAAATGCGGTAAAGTTGACAAACACATCCCGAGCGAGGTCTATC	GATGTACTTGTTATGCGCTC	GATGTATCTCGATGGTGAAG
e101970	e101970	Unknown Function	CPAR2_101970	CPAR2_101970::StopTAG/CPAR2_101970::StopTAG			1	This study (Lombardi, Salzberg, O'Cinneide, 2Set)	CCAGTACAATCGTCGCATGTTTC	AACGAAACATGCGACGATTGTAC	ACCTGCGTTGCACTTGGTGT	TTAGGATTCGAAATCAGCACCTGTCCAGAATAGATAGATAGACCTGCGTTGCACTT	AGGGAACTTGGAAGTACAATCGTCGCATGTACACCAAGTGCAACGCAGGTCTATC	CGTTTAGACGGCTTAATCTG	CATCTCTTGTCTCTTGTACG
e102070	e102070	TF	CPAR2_102070	CPAR2_102070::StopTAG/CPAR2_102070::StopTAG		2 nt mismatches	2	This study (Lombardi, Salzberg, O'Cinneide, 3Set)	CCATAGTGGTGGTGGTGGGCATT	AACAATGCCCACCACCACCACTA	ACGAAGCGATGGTGACATAT	AGATTTATCACCACCAGCGCCAATCCCAATTAGATAGATAGACGAAGCGATGGTGA	ATGGTGGTGGTGGTAGTGGTGGTGGTGGGCATATGTCACCATCGCTTCGTCTATC	GCCTCTTTTATACTCATCGG	GAAGAGGGATGATTTTGACG
e207340	e207340	TF	CPAR2_207340	CPAR2_207340::StopTAG/CPAR2_207340::StopTAG			2	This study (Lombardi, Salzberg, O'Cinneide, 3Set)	CCATGAGCTTCAAGATTGTGTCC	AACGGACACAATCTTGAAGCTCA	GAGATTAGTACACACCCTAC	ACCAATTTATCCACTTCGTCCATGCCTGGATAGATAGATAGGAGATTAGTACACAC	AGTAGGTTGTATTTGAGCTTCAAGATTGTGGTAGGGTGTGTACTAATCTCCTATC	GACCACTTAGCACCATAAAG	GCCAGTATATTCTCAGTGTG
e209750	e209750	TF	CPAR2_209750	CPAR2_209750::StopTAG/CPAR2_209750::StopTAG		1 nt mismatch	2	This study (Lombardi, Salzberg, O'Cinneide, 3Set)	CCACGATGTATGGAGCCACAAAT	AACATTTGTGGCTCCATACATCG	GCAACTCTTCTGCCAGTATT	CTCGAACTTATATCGATGTATGGAGCCACATAGATAGATAGGCAACTCTTCTGCCA	TTCCAAAGTGTTGACTATTCTAACCCAATTAATACTGGCAGAAGAGTTGCCTATC	CCCTTATAACTACCAGCAAG	GGATCACCTTCAATATGTGC
e211470	e211470	TF	CPAR2_211470	CPAR2_211470::StopTAG/CPAR2_211470::StopTAG			2	This study (Lombardi, Salzberg, O'Cinneide, 3Set)	CCACCGCTCACTGGAGTCAATTG	AACCAATTGACTCCAGTGAGCGG	GCCACTGTATTAAGATAGCG	ATAGCTTGGCTTTCCGCTCACTGGAGTCAATAGATAGATAGGCCACTGTATTAAGA	CCATAATGGGCGACTTCTCATTCACCGCAACGCTATCTTAATACAGTGGCCTATC	CGGTATCCTCCTCTCTATAA	GGTCAACTCAATGATCTTCC
e400180	e400180	TF	CPAR2_400180	CPAR2_400180::StopTAG/CPAR2_400180::StopTAG			2	This study (Lombardi, Salzberg, O'Cinneide, 3Set)	CCAATAATGGACATGGCTATTGT	AACACAATAGCCATGTCCATTAT	TAGAGCAGACGCATTGACAG	CTAAAAACTCGATTTTTTCCAAAACCAACATAGATAGATAGTAGAGCAGACGCATT	AGTTCAAAAGCTCATAATGGACATGGCTATCTGTCAATGCGTCTGCTCTACTATC	TCTATGAGACTTATGCCGAG	CAAAGTCCCAGCAGATAAAC
e401480	e401480	TF	CPAR2_401480	CPAR2_401480::StopTAG/CPAR2_401480::StopTAG			2	This study (Lombardi, Salzberg, O'Cinneide, 3Set)	CCAAATGAGAATGGGGTTGCGAA	AACTTCGCAACCCCATTCTCATT	TATAGAACGGTGCATGGACT	GAAACCACAAAGTACATCAAACTCCCATTCTAGATAGATAGTATAGAACGGTGCAT	GAGTGCGAGTGTGAATGAGAATGGGGTTGCAGTCCATGCACCGTTCTATACTATC	GACTACATCTTCAACTTCCC	GTATATAGGGGTAATGACGG
e407350	e407350	TF	CPAR2_407350	CPAR2_407350::StopTAG/CPAR2_407350::StopTAG			2	This study (Lombardi, Salzberg, O'Cinneide, 3Set)	CCATCACTGATATCGTTTAGTCC	AACGGACTAAACGATATCAGTGA	TGCAGAGAATAACTGTGACC	ATTAGTCACTTGCATGAATTACTTCCAGGATAGATAGATAGTGCAGAGAATAACTG	TGCTTCGAATGCATCACTGATATCGTTTAGGGTCACAGTTATTCTCTGCACTATC	TTATACCTCTATCCTAGGCC	CGTATATTCTCAGGGATCTC
e804580	e804580	TF	CPAR2_804580	CPAR2_804580::StopTAG/CPAR2_804580::StopTAG			2	This study (Lombardi, Salzberg, O'Cinneide, 3Set)	CCAGATGTTTGACGAAGGAGCCG	AACCGGCTCCTTCGTCAAACATC	CCAGGATGATGAATACGAGC	TAACGAAAAGTGGGGTTTCAACTACCACGGTAGATAGATAGCCAGGATGATGAATA	TTATACTGTTGAGGATGTTTGACGAAGGAGGCTCGTATTCATCATCCTGGCTATC	GAGCTATCTACCCCATAATC	GAATGAGTAGTGGTAGAAGC
e804830	e804830	TF	CPAR2_804830	CPAR2_804830::StopTAG/CPAR2_804830::StopTAG			1	This study (Lombardi, Salzberg, O'Cinneide, 3Set)	CCAATATAGGTCCCAGTGATTGT	AACACAATCACTGGGACCTATAT	CCATAGGTTTAACGCTTGCG	AGCTACAGATCCAGACAGCGAAAACCAACATAGATAGATAGCCATAGGTTTAACGC	TGACAATTATCACATATAGGTCCCAGTGATCGCAAGCGTTAAACCTATGGCTATC	GTCTGGAATACTACCCTTTG	GTCGTAGTCTCTTGATGATG
e100010	e100010	Chr 1	CPAR2_100010	CPAR2_100010::StopTAG/CPAR2_100010::StopTAG			2	This study (Lombardi, Salzberg, O'Cinneide, 3Set)	CCAGCACCTGAAAGTGCTTTGTC	AACGACAAAGCACTTTCAGGTGC	ACACAGGCATGGAATGTATC	TTTGGAAAATGGATGTCAATCTTCCCTGACTAGATAGATAGACACAGGCATGGAAT	CCCAACGTGGACGGCACCTGAAAGTGCTTTGATACATTCCATGCCTGTGTCTATC	GAGGGTAATGCTAGTTAGAG	GATATCTTCAACCAACCCAC
e100040	e100040	Chr 1	CPAR2_100040	CPAR2_100040::StopTAG/CPAR2_100040::StopTAG			2	This study (Lombardi, Salzberg, O'Cinneide, 3Set)	CCACATGGATCACTTATTTGTGC	AACGCACAAATAAGTGATCCATG	ACACATCGTAAACGGGCCGA	AGTGGCGAACCAGTTGATAGACTTCCTGCATAGATAGATAGACACATCGTAAACGG	GGATACAGCTATCCATGGATCACTTATTTGTCGGCCCGTTTACGATGTGTCTATC	GTACAGAGTTTGGGTTTCTC	CCGTAGTAAACTCCCTTTTC
e100090	e100090	Chr 1	CPAR2_100090	CPAR2_100090::StopTAG/CPAR2_100090::StopTAG			2	This study (Lombardi, Salzberg, O'Cinneide, 3Set)	CCAGGAGCCGTGAAGCAATTAGG	AACCCTAATTGCTTCACGGCTCC	ACACCCTTGAGAGGCTAGTG	AAATCTGTCGTTTGGAGCCGTGAAGCAATTTAGATAGATAGACACCCTTGAGAGGC	TGTTGTTGTTGTTGCAGCAGGGATCCACCTCACTAGCCTCTCAAGGGTGTCTATC	GAGTACCAATGTGAGTAGTG	CAAGTACCCCTTAACAACAG
e100100	e100100	Chr 1	CPAR2_100100	CPAR2_100100::StopTAG/CPAR2_100100::StopTAG			2	This study (Lombardi, Salzberg, O'Cinneide, 3Set)	CCATGATGGTTGTTGGTGTGTGG	AACCCACACACCAACAACCATCA	ACACCGAGCCGATATTCGTG	GAATACAGTTTATACAAGAAACAACCACCATAGATAGATAGACACCGAGCCGATAT	GAGTTGTATTATTTGATGGTTGTTGGTGTGCACGAATATCGGCTCGGTGTCTATC	CAACTGCTACTACTACTGCT	CTCCAGAAACATCTCTAACC
e100110	e100110	Chr 1	CPAR2_100110	CPAR2_100110::StopTAG/CPAR2_100110::StopTAG			2	This study (Lombardi, Salzberg, O'Cinneide, 3Set)	CCAAGCGGGAATCTATGTTATAT	AACATATAACATAGATTCCCGCT	ACACCGTATTTAAGACTGCG	ATAAATTGGCTGAAGCGGGAATCTATGTTATAGATAGATAGACACCGTATTTAAGA	TGGAAGAATGTGGAGTATTGACATCCAATACGCAGTCTTAAATACGGTGTCTATC	CCTGCTATTGAAGTACAAGG	GTTGTCATACTAGCATCTCC
e100160	e100160	Chr 1	CPAR2_100160	CPAR2_100160::StopTAG/CPAR2_100160::StopTAG			2	This study (Lombardi, Salzberg, O'Cinneide, 3Set)	CCAGAGGTAGTGGAGCACCGATG	AACCATCGGTGCTCCACTACCTC	ACACCTGATTCACAGTGGCG	TCTAGATTTTCAGGAGGTAGTGGAGCACCGTAGATAGATAGACACCTGATTCACAG	GTCGAGTCCAGCTGCATAAAACGTCCACATCGCCACTGTGAATCAGGTGTCTATC	GATACAGTGTCGTTTGTAGG	TCCTATACTCATCAACCTCG
e100240	e100240	Chr 1	CPAR2_100240	CPAR2_100240::StopTAG/CPAR2_100240::StopTAG		1 nt mistmatch	2	This study (Lombardi, Salzberg, O'Cinneide, 3Set)	CCAAAACCAATAGAACAACCAGC	AACGCTGGTTGTTCTATTGGTTT	ACACGGAGGTCATGCTATCT	TTGGTCCAAATTCAAACCAATAGAACAACCTAGATAGATAGACACGGAGGTCATGC	TCGTTGACAGTTTCAACGATAAATCCTGCTAGATAGCATGACCTCCGTGTCTATC	GAAGAGACTCGTATGAGAAG	CCAAGACGTAGATTCCATAC
e100280	e100280	Chr 1	CPAR2_100280	CPAR2_100280::StopTAG/CPAR2_100280::StopTAG			1	This study (Lombardi, Salzberg, O'Cinneide, 3Set)	CCATCCATCATGATGCTTGCTTC	AACGAAGCAAGCATCATGATGGA	ACACGGTGGGAACTTGTTTC	GATGCTCATTGGGTCCATCATGATGCTTGCTAGATAGATAGACACGGTGGGAACTT	TTGGTCGAGTAAGTGAATACAATGCCTGAAGAAACAAGTTCCCACCGTGTCTATC	CTTGTGTGAAAACTGCTTCC	GAATCTTCTTCCTCTGACTC
e100300	e100300	Chr 1	CPAR2_100300	CPAR2_100300::StopTAG/CPAR2_100300::StopTAG			2	This study (Lombardi, Salzberg, O'Cinneide, 3Set)	CCAAGGTTAAGGCAGTGTTGTAT	AACATACAACACTGCCTTAACCT	ACACTAACGGAAGTTCTACC	TGAAGAGTTGAAACTAACAGGCAACCAATATAGATAGATAGACACTAACGGAAGTT	GGGACAAAGAATAAGGTTAAGGCAGTGTTGGGTAGAACTTCCGTTAGTGTCTATC	CACCACTTCATAGTATGACC	GAGCTTATTCCATGCAATCC
e100330	e100330	Chr 1	CPAR2_100330	CPAR2_100330::StopTAG/CPAR2_100330::StopTAG			2	This study (Lombardi, Salzberg, O'Cinneide, 3Set)	CCAAATGTCCATTTGCGCAATGT	AACACATTGCGCAAATGGACATT	ACACTCACGACATATAGGTC	CTTTTGCATGGATAATGTCCATTTGCGCAATAGATAGATAGACACTCACGACATAT	TGGCTCCCCATGTGGAGAACGAGGCCAACAGACCTATATGTCGTGAGTGTCTATC	CAGGACATTCTGAACTATCG	AAGATCAACCCACCTAATCC
e100370	e100370	Chr 1	CPAR2_100370	CPAR2_100370::StopTAG/CPAR2_100370::StopTAG			2	This study (Lombardi, Salzberg, O'Cinneide, 3Set)	CCAATCGGGTATGGGCAAACTAA	AACTTAGTTTGCCCATACCCGAT	ACACTCGTACCATTGATGCG	GTATTGATGCTGGATCGGGTATGGGCAAACTAGATAGATAGACACTCGTACCATTG	ACTTGCTTTCTTGATAGATTATTTCCGTTACGCATCAATGGTACGAGTGTCTATC	CCAGTCTCATATCATATGGC	GTATACGTCTCTCCAAACTC
e100390	e100390	Chr 1	CPAR2_100390	CPAR2_100390::StopTAG/CPAR2_100390::StopTAG		first 8 bp of the RT not present in the sequence	2	This study (Lombardi, Salzberg, O'Cinneide, 3Set)	CCACCTTTGGTGCAAGTGGATGT	AACACATCCACTTGCACCAAAGG	ACACTCTAGTCAGGTGGTTG	TGTTCCAAAACCTCACTCAGCAGGCCCACATAGATAGATAGACACTCTAGTCAGGT	CCTGGTACTACGCCCTTTGGTGCAAGTGGACAACCACCTGACTAGAGTGTCTATC	GTAGTAATAGGCTAAACCCG	CGAATGGATTACTACAGGTG
e100410	e100410	Chr 1	CPAR2_100410	CPAR2_100410::StopTAG/CPAR2_100410::StopTAG			2	This study (Lombardi, Salzberg, O'Cinneide, 3Set)	CCAGTAGAGAATCAAGTCGGATG	AACCATCCGACTTGATTCTCTAC	ACACTGGAGGAATGCCTAGC	TCATTAAAAACAAGGAACACGCTTCCGCATTAGATAGATAGACACTGGAGGAATGC	AAACTTGTATAAGGTAGAGAATCAAGTCGGGCTAGGCATTCCTCCAGTGTCTATC	GAATCTTTTGCCTCAAGTGG	GGCATCAATACCTCTGAGAA
e100590	e100590	Chr 1	CPAR2_100590	CPAR2_100590::StopTAG/CPAR2_100590::StopTAG			2	This study (Lombardi, Salzberg, O'Cinneide, 3Set)	CCATGGGTCACTGGGACCGGAGG	AACCCTCCGGTCCCAGTGACCCA	ACAGCTCTGCTAAGATGGAG	TTACGACAACAATTGGGTCACTGGGACCGGTAGATAGATAGACAGCTCTGCTAAGA	CCATCAACATCTCTTATGGAAATACCACCTCTCCATCTTAGCAGAGCTGTCTATC	CCCCACGTGAGATCAATTTA	GGCTTCTTGTAACGAATCAG
e100630	e100630	Chr 1	CPAR2_100630	CPAR2_100630::StopTAG/CPAR2_100630::StopTAG			2	This study (Lombardi, Salzberg, O'Cinneide, 3Set)	CCAAAACTCAAAGTGTTGTTGCG	AACCGCAACAACACTTTGAGTTT	ACAGGCTGAGAACTGATGAC	GACCAACCATTATCCCCAAAATGACCACGCTAGATAGATAGACAGGCTGAGAACTG	AATGAATTTTGGGAAACTCAAAGTGTTGTTGTCATCAGTTCTCAGCCTGTCTATC	CTGCTACTGTTAGATCAACC	GCCCCAATCAACTATACTTC
e100650	e100650	Chr 1	CPAR2_100650	CPAR2_100650::StopTAG/CPAR2_100650::StopTAG			2	This study (Lombardi, Salzberg, O'Cinneide, 3Set)	CCAGTTTGTTGGATGCCCTAGGT	AACACCTAGGGCATCCAACAAAC	ACAGGTCCGTAACTTGGTAG	AGTTGCTAAGTTTGTTTGTTGGATGCCCTATAGATAGATAGACAGGTCCGTAACTT	CACAATTGACCAAAGTTAATCTTTCCAACCCTACCAAGTTACGGACCTGTCTATC	GGAAAGAAGAGACTGGTACT	CTCCAAAATATGTCCCTCAG
e100660	e100660	Chr 1	CPAR2_100660	CPAR2_100660::StopTAG/CPAR2_100660::StopTAG			2	This study (Lombardi, Salzberg, O'Cinneide, 3Set)	CCAAGAAGGGAATTGGATCATGC	AACGCATGATCCAATTCCCTTCT	ACAGGTCGGAGATTTCGCTT	CTAGTGAACAATTAGAAGGGAATTGGATCATAGATAGATAGACAGGTCGGAGATTT	ACTCACCAAAACATGAAATAATCACCGGCAAAGCGAAATCTCCGACCTGTCTATC	CGTCGACTACTATCAGTACT	CCATCATCTAACGACACCAA
e100690	e100690	Chr 1	CPAR2_100690	CPAR2_100690::StopTAG/CPAR2_100690::StopTAG			2	This study (Lombardi, Salzberg, O'Cinneide, 3Set)	CCATTCATCCTTGGCGACACCAG	AACCTGGTGTCGCCAAGGATGAA	ACAGGTTAGCAACAGTGGTA	TGAATGATGGTGATGCCACGAAAGCCACTGTAGATAGATAGACAGGTTAGCAACAG	CGGCTGCTTTGTCTTCATCCTTGGCGACACTACCACTGTTGCTAACCTGTCTATC	GTGACACTTGTACTGCAATC	CCTGGTCCCTTCATTATTTC
e100710	e100710	Chr 1	CPAR2_100710	CPAR2_100710::StopTAG/CPAR2_100710::StopTAG			2	This study (Lombardi, Salzberg, O'Cinneide, 3Set)	CCAAATCGAAGCAAACTCGTTAC	AACGTAACGAGTTTGCTTCGATT	ACAGTATGGACAGTTCCGCG	CTTTGGATGGAGAAATTACCATCTCCGGTATAGATAGATAGACAGTATGGACAGTT	ACTGAGGTAAATCAATCGAAGCAAACTCGTCGCGGAACTGTCCATACTGTCTATC	ACAGAAGAAGCTCAGATCTC	CTCTCAATTCACTAGCTGAC
e100740	e100740	Chr 1	CPAR2_100740	CPAR2_100740::StopTAG/CPAR2_100740::StopTAG			2	This study (Lombardi, Salzberg, O'Cinneide, 3Set)	CCAGTGCTTGATGATAATAGTCG	AACCGACTATTATCATCAAGCAC	ACAGTCGCTAAAGTCCTAGA	TTCAACTGCTTCTTCACCAAACCACCACGATAGATAGATAGACAGTCGCTAAAGTC	GCTTTACTTAAGTGTGCTTGATGATAATAGTCTAGGACTTTAGCGACTGTCTATC	GTCAGTTACTATCTAGGAGG	TTAGGCTCCTCATTCAATCC
e100750	e100750	Chr 1	CPAR2_100750	CPAR2_100750::StopTAG/CPAR2_100750::StopTAG			2	This study (Lombardi, Salzberg, O'Cinneide, 3Set)	CCAAAGGGGTTGAAACTGTCTTG	AACCAAGACAGTTTCAACCCCTT	ACAGTCTTGTAATCTGCTGG	TGTCCGGGTGGTAAGATTTGTGCACCTCAATAGATAGATAGACAGTCTTGTAATCT	TGAGGTGGATTCAAAGGGGTTGAAACTGTCCCAGCAGATTACAAGACTGTCTATC	TACTAATGGTACCCCTGTTG	GTATCCAACAACGCCATAGT
e100760	e100760	Chr 1	CPAR2_100760	CPAR2_100760::StopTAG/CPAR2_100760::StopTAG			2	This study (Lombardi, Salzberg, O'Cinneide, 3Set)	CCAAGTGGCAAATCTGCCAGTGG	AACCCACTGGCAGATTTGCCACT	ACAGTGCAGTCATACGAGTG	TCAAAAGGAAACTCCTCAATATTGCCACCATAGATAGATAGACAGTGCAGTCATAC	CCTCTGGGGTAAAAGTGGCAAATCTGCCAGCACTCGTATGACTGCACTGTCTATC	GGTCTATCACCTTCCTTTTG	CTCCATCGTTCCTAGACATT
e100800	e100800	Chr 1	CPAR2_100800	CPAR2_100800::StopTAG/CPAR2_100800::StopTAG			2	This study (Lombardi, Salzberg, O'Cinneide, 3Set)	CCATCACCACCATCATGGTCCAA	AACTTGGACCATGATGGTGGTGA	ACAGTTAAGGGAAGTTACGC	ATGTCCAAACCTAAGATTAGCATACCATTGTAGATAGATAGACAGTTAAGGGAAGT	AGGGTTTTTGCACTCACCACCATCATGGTCGCGTAACTTCCCTTAACTGTCTATC	GTCAATGCAGCTAGAGAGAT	CGAGTAGGTCCAATCATATG
e100810	e100810	Chr 1	CPAR2_100810	CPAR2_100810::StopTAG/CPAR2_100810::StopTAG			1	This study (Lombardi, Salzberg, O'Cinneide, 3Set)	CCAAAGGGAGGCTTTATTCAATA	AACTATTGAATAAAGCCTCCCTT	ACAGTTATCCTAAGTCGCAG	ACAAGACTGAAAAATTCAACATCTCCTTATTAGATAGATAGACAGTTATCCTAAGT	TTTCAGCATTCAAAAGGGAGGCTTTATTCACTGCGACTTAGGATAACTGTCTATC	CTGAAGTGGCCAATAACTTG	TATCGACAAGTGCAAAGGAG
e100820	e100820	Chr 1	CPAR2_100820	CPAR2_100820::StopTAG/CPAR2_100820::StopTAG		2 nt mismatches	2	This study (Lombardi, Salzberg, O'Cinneide, 3Set)	CCAACTTGGATGGAAAACTACGG	AACCCGTAGTTTTCCATCCAAGT	ACAGTTCAGACATGAGAGTC	AACAAATTGATTCACTTGGATGGAAAACTATAGATAGATAGACAGTTCAGACATGA	GTGAAACTTTTTCAAGAGGATTTTCCACCGGACTCTCATGTCTGAACTGTCTATC	CTCCCAACTGTCGTTTAAAG	CTTCGTCAATTCCCATAAGG
e100860	e100860	Chr 1	CPAR2_100860	CPAR2_100860::StopTAG/CPAR2_100860::StopTAG			2	This study (Lombardi, Salzberg, O'Cinneide, 3Set)	CCAGATGTGTGTACACTTTCCAG	AACCTGGAAAGTGTACACACATC	ACATAACTGGTTTCAAGGGC	TATCAGTTCGAAATTGGAATATGACCACTGTAGATAGATAGACATAACTGGTTTCA	TATGACCACGAAAGATGTGTGTACACTTTCGCCCTTGAAACCAGTTATGTCTATC	CGAAGAATGATCCTCAACAG	GTCGAGTATACCCAATCTTG
e100890	e100890	Chr 1	CPAR2_100890	CPAR2_100890::StopTAG/CPAR2_100890::StopTAG			2	This study (Lombardi, Salzberg, O'Cinneide, 3Set)	CCAGTTCGACTAACTGAGAACCG	AACCGGTTCTCAGTTAGTCGAAC	ACATACGTCATAAGCCGATC	CATACTTCAACCAAATTGCAGCTACCTCGGTAGATAGATAGACATACGTCATAAGC	ATTTGTGGGACTCGTTCGACTAACTGAGAAGATCGGCTTATGACGTATGTCTATC	GATCTAGAACCTACCATTCG	CCGATATCCTTTTCCCTCAT
e100910	e100910	Chr 1	CPAR2_100910	CPAR2_100910::StopTAG/CPAR2_100910::StopTAG			1	This study (Lombardi, Salzberg, O'Cinneide, 3Set)	CCACTTGTGCTCGCGCAGTGACT	AACAGTCACTGCGCGAGCACAAG	ACATAGAGATGACGGACCTG	ACTATCCCTACTTAATGTCCTTCTCCTAGTTAGATAGATAGACATAGAGATGACGG	GCGTATTCATCGCCTTGTGCTCGCGCAGTGCAGGTCCGTCATCTCTATGTCTATC	GTAAGCATTCTTCTCCAAGG	GTCCATTGTATGCTTCACTC
e100970	e100970	Chr 1	CPAR2_100970	CPAR2_100970::StopTAG/CPAR2_100970::StopTAG			2	This study (Lombardi, Salzberg, O'Cinneide, 3Set)	CCAGTTCTGAGACTGGCTCTGTA	AACTACAGAGCCAGTCTCAGAAC	ACATCAGGTGTAAGTGTTCG	AACAACAACAACAGCAACAGCAGTCCATACTAGATAGATAGACATCAGGTGTAAGT	CAGAGGTGTGTCCGTTCTGAGACTGGCTCTCGAACACTTACACCTGATGTCTATC	GAAGTGAGTGACTAAACCTC	GTAAGTCCAATGCATCATCG
e100990	e100990	Chr 1	CPAR2_100990	CPAR2_100990::StopTAG/CPAR2_100990::StopTAG			2	This study (Lombardi, Salzberg, O'Cinneide, 3Set)	CCAAATCTACCCAAGACGATGGG	AACCCCATCGTCTTGGGTAGATT	ACATCATGGGAATCCGAGGC	GTTCAAGATGCCAATTTACAATTGCCACCCTAGATAGATAGACATCATGGGAATCC	AGGATCAGACCCAAATCTACCCAAGACGATGCCTCGGATTCCCATGATGTCTATC	GACAAGTTACCAATAGACCC	CCACCAAAGATACCACTATG
e101000	e101000	Chr 1	CPAR2_101000	CPAR2_101000::StopTAG/CPAR2_101000::StopTAG			2	This study (Lombardi, Salzberg, O'Cinneide, 3Set)	CCACATCATTACCGATCTGGTCA	AACTGACCAGATCGGTAATGATG	ACATCATTCCAAGGGACCTA	TCAACAACAGCATCATCATTACCGATCTGGTAGATAGATAGACATCATTCCAAGGG	TTATGGTTATAATGATGATGAGAACCATGATAGGTCCCTTGGAATGATGTCTATC	GCCTGATCCTTCTTGTTTAC	CCATCAGTTGTGGTATTAGC
e101020	e101020	Chr 1	CPAR2_101020	CPAR2_101020::StopTAG/CPAR2_101020::StopTAG			2	This study (Lombardi, Salzberg, O'Cinneide, 3Set)	CCATCACCCTTCCAGGCAAACAC	AACGTGTTTGCCTGGAAGGGTGA	ACATCGCGTAGCAGTCATGG	GCTGCTATCGCTGCTGCTGGTGTTCCTGTGTAGATAGATAGACATCGCGTAGCAGT	CTCTTCTTCAGTTTCACCCTTCCAGGCAAACCATGACTGCTACGCGATGTCTATC	GTTGCCGATATCTCATTAGC	GATAACTCTAGCTCCCATAC
e101030	e101030	Chr 1	CPAR2_101030	CPAR2_101030::StopTAG/CPAR2_101030::StopTAG			2	This study (Lombardi, Salzberg, O'Cinneide, 3Set)	CCATAAATCTTTGGGGCCAGTGG	AACCCACTGGCCCCAAAGATTTA	ACATCGGCTCTAATAGTACG	AAACCCAGTTCTGGGACTATAGTCCCGCCATAGATAGATAGACATCGGCTCTAATA	CATGTAAAGTGAATAAATCTTTGGGGCCAGCGTACTATTAGAGCCGATGTCTATC	GTACATTTCCTCGACATCAG	TTTACTAGGTGTGATTCCGG
e101040	e101040	Chr 1	CPAR2_101040	CPAR2_101040::StopTAG/CPAR2_101040::StopTAG		the first 7 bp of the RT truncated	2	This study (Lombardi, Salzberg, O'Cinneide, 3Set)	CCAGTGTTGGTTTCACAGCAGGT	AACACCTGCTGTGAAACCAACAC	ACATCGGGTAAACGCCTCGA	AGACAAAAATTTGGTGTTGGTTTCACAGCATAGATAGATAGACATCGGGTAAACGC	TATTCCAAATATGAAAAAGAAGATCCCACCTCGAGGCGTTTACCCGATGTCTATC	GTAGTTGGTTGAGGGTAATG	TCTCAACTGCTCTCTATACC
e101070	e101070	Chr 1	CPAR2_101070	CPAR2_101070::StopTAG/CPAR2_101070::StopTAG			2	This study (Lombardi, Salzberg, O'Cinneide, 3Set)	CCAGTAGATACCAGCACGCACAA	AACTTGTGCGTGCTGGTATCTAC	ACATGAAGCGGCTCGAATGC	CGGGAATGAACCCTGCAGTAAGAGCCGTTGTAGATAGATAGACATGAAGCGGCTCG	CATCACACCCATAGTAGATACCAGCACGCAGCATTCGAGCCGCTTCATGTCTATC	CACGTTAAAGATCCATTGGG	CTTGGTCCTCGGTTAATTTC
Sanger sequencing of PCR products containing the edit
The lineage A of each mutant was sequenced. If the lineage A did not contain the edit, lineage B was sequenced.
Color legend:
		Lineage A contains the edit; lineage B not sequenced
		Lineage A was not correct (usually WT contamination); we sequenced lineage B and that contains the edit
		Neither lineages is correct; WT contamination present in both
In a few strains the sequence of the edited locus contains SNPs/short truncations (see "comments" column)
We checked the position of these SNPs/truncations, and none of them is in the barcode sequence or in the 11 bp stop codons.
As a result, the barcode sequence is intact and the gene is succesfully disrupted in these strains.

## Sheet: Plate layout
The collection entails 4 plates, in duplicate (lineage A and lineage B, same layout for both lineages).
LH-1/LH-2 ("Red" plate)
LH-1/LH-2	1	2	3	4	5	6	7	8	9	10	11	12
A	cpar2_212670	cpar2_601080	cpar2_202440	cpar2_107940	cpar2_205990	cpar2_104660	cpar2_704370	cpar2_703890	CPRI	cpar2_108820	cpar2_801430	cpar2_302900
B	cpar2_400930	cpar2_807110	cpar2_803820	cpar2_304220	cpar2_804640	cpar2_404850	cpar2_401970	cpar2_808810	cpar2_600640	cpar2_100540	CF1-4 KO 1.1	cpar2_806980
C	cpar2_209090	cpar2_202040	cpar2_213110	cpar2_501640	cpar2_400410	cpar2_800210	cpar2_213480	cpar2_405400	cpar2_501900	cpar2_800710	cpar2_403080	cpar2_804950
D	cpar2_208290	cpar2_207280	CLIB214	CPRI	cpar2_303450	cpar2_204370	cpar2_404190	cpar2_301340	CLIB214	CPRI	2.1.1.5 (CPL2H1)	cpar2_700450
E	cpar2_205120	cpar2_303270	cpar2_700810	cpar2_805930	cpar2_211250	cpar2_101340	cpar2_800090	cpar2_300790	cpar2_300790	cpar2_801360	cpar2_806320	cpar2_109520
F	CF5+6 KO 1.1	cpar2_405030	cpar2_203050	cpar2_404600	cpar2_807270	cpar2_109320	cpar2_603440	cpar2_213640	cpar2_210550	cpar2_502710	cpar2_406480	cpar2_204380
G	cpar2_808620	cpar2_110380	cpar2_302880	cpar2_405260	cpar2_303540	cpar2_700800	cpar2_804490	cpar2_407950	cpar2_500080	cpar2_303520	cpar2_400190	cpar2_110360
H	cpar2_600470	cpar2_204560	cpar2_211740	cpar2_801100	cpar2_206880	cpar2_208600	cpar2_201510	cpar2_700130	cpar2_101060	cpar2_101730	cpar2_303510	cpar2_207400
LH3_ST1/ST2_FM ("Blue" plate)
LH3_ST1/ST2_FM	1	2	3	4	5	6	7	8	9	10	11	12
A	cpar2_405770	cpar2_500590	cpar2_303500	cpar2_206390	cpar2_106900	cpar2_300250	cpar2_402210	cpar2_802840	cpar2_401920	cpar2_405470	cpar2_602060	cpar2_806000
B	cpar2_801290	cpar2_206880	cpar_407720	ignore	cpar_805000	cpar2_501290	cpar2_702260	cpar2_103120	cpar2_200790	cpar2_204950	cpar2_801450	cpar2_302310
C	cpar2_401470	cpar2_806570	cpar2_406460	cpar2_700880	cpar2_803920	cpar2_406510	cpar2_402070	cpar2_802880	cpar2_400210	cpar2_401180	cpar2_106540	cpar2_701070
D	cpar2_210620	cpar2_704130	CLIB214	CPRI	cpar2_400090	cpar2_700900	cpar2_300960	cpar2_208030	CLIB214	CPRI	cpar2_303590	cpar2_102000
E	cpar2_106250	cpar2_501580	cpar2_203610	cpar2_202390	cpar2_101530	cpar2_501570	cpar2_102000	cpar2_206370	cpar2_403520	cpar2_806830	cpar2_407720	cpar2_303750
F	cpar2_207490	cpar2_802440	cpar2_203540	cpar2_502960	cpar2_208790	cpar2_807820	cpar2_109540	cpar2_302230	cpar2_109760	cpar2_602450	cpar2_202450	cpar2_202900
G	cpar2_110110	cpar2_800080	cpar2_103550	cpar2_807260	cpar2_806500	cpar2_800890	cpar2_203270	cpar2_702590	cpar2_106680	cpar2_100830	cpar2_101010	cpar2_202710
H	cpar2_102740	cpar2_204990	cpar2_211900	cpar2_109790	cpar2_800040	cpar2_804160	cpar2_401290	cpar2_400920	cpar2_701620	e103720	e103980	e105230
FM-CRISPR1/CRISPR1-2 ("Yellow" plate)
FM-CRISPR1/CRISPR1-2	1	2	3	4	5	6	7	8	9	10	11	12
A	e107310	e107840	e108080	e108570	e109060	e202090	e405490	e406290	e406480	e406540	e407630	e407810
B	e203290	e203960	e700880	e300660	e301500	e301940	e500180	e502210	e502720	e503350	e602810	e603510
C	e304240	e211180	e209930	e210910	e807380	e302555	e700800	e701900	e702250	e702870	e703650	e704220
D	e806730	CLIB214	CLIB214	CPRI	e105560	e106120	e800090	e800700	CLIB214	CPRI	e801360	e801470
E	e107760	e104020	e201420	e202440	e202940	e203430	e802210	e804640	e804940	e804950	e806320	e806480
F	e205170	e206950	e207500	e208870	e209520	e207170	e806750	e808450	e108840	e205070	e208590	e211370
G	e212760	e301160	e301570	e301780	ignore	e207940	e401830	e700280	e202000	e207470	e210200	e201170
H	e210000	e211130	e300490	e302540	e403060	e404320	e206880	e210090	e210430	e211110	e211250	e503290
CRISPR 2-3/CRISPR 3-4 ("Green" plate)
CRISPR 2-3/CRISPR 3-4	1	2	3	4	5	6	7	8	9	10	11	12
A	e601870	e602180	e700710	e800460	e407920	e500570	e101300	e101890	e207340	e209750	e211470	e400180
B	e503760	e600300	e600840	e602020	e602370	e700930	e401480	e804580	e804830	e100590	e100630	e100660
C	e701050	e702200	e502700	e602290	e802280	e211180	e100710	e100740	e100750	e100760	e100800	e100810
D	e404560	e407160	CLIB214	CPRI	e802630	e803470	e100820	e100860	CLIB214	CPRI	e100890	e100910
E	e806780	e100020	e100070	e100130	e100250	e100270	e100970	e100990	e101000	e101020	e101030	e101040
F	e100340	e100400	e100565	e100730	e100770	e100900	e101070	e102070	e407350	e100650	e100690	e100010
G	e100920	e100950	e101110	e101210	e101210	e101540	e100040	e100090	e100100	e100110	e100160	e100240
H	e101740	e101770	e101780	e101970	e101820	e805700	e100280	e100300	e100330	e100370	e100390	e100410

## Sheet: 1536 format plate
		The collection was condensed in 1536 array format using the Singer Rotor. Each mutation was represented 4 times (2 technical replicates, 2 biological replicates), according to the scheme below.
		The PURPLE FRAME (A-H rows, 1-12 columns) reflects the layout on the original 96well stock plates (labelled red, blue, yellow and green as indicated in the tab "Plate Layout"
		The GREY FRAME (A-P rows, 1-24 columns) reflects the layout of the 1536 format plate on which the 8 96w plates of the library (4 for each lineage) are consended
		The two different frames of cohordinates can be used to associate each position on the condensed plate with the corresponding mutant on the source library plate.
		E.g. : data corresponding to position E9 in the phenotypic screen (1536 format) corresponds to the mutant located in position C5 of the "Red" 96w plate
		In the Phenobooth output Excel files (Tables S2 and S4), each strain is identified in terms of the location on the 1536 condensed plate (GREY FRAME)
		E. g. Row G Col 5 (G5) corresponds to D3 in the Red plate (CLIB214)
		1		2		3		4		5		6		7		8		9		10		11		12		13		14		15		16		17		18		19		20		21		22		23		24
		1				2				3				4				5				6				7				8				9				10				11				12
A	A
B
C	B
D
E	C
F
G	D									CLIB214				CPRI																				CLIB214				CPRI
H
I	E
J
K	F
L
M	G
N
O	H
P
				plate 1			Lineage A plates
				plate 2
				plate 3
				plate 4
				plate 5			Lineage B plates
				plate 6
				plate 7
				plate 8

## Sheet: Follow-up CRISPR mutants
Generation of follow-up CRISPR-Cas9 mutants (editing, deletion, complementation)
Edited strains
Strain Name	Lineages	Gene	CPAR ID	Genotype	gRNA_TOP	gRNA_BOT	RT_TOP	RT_BOT	SCREENPRIMER_FWD	SCREENPRIMER_REV		generation of guide RNA: gRNA_TOP + gRNA_BOT
Ed met4	2	MET4	CPAR2_402070	CPAR2_402070::StopTAG/CPAR2_402070::StopTAG	CCAGCTAGTTCGGGAAACAATGA	AACTCATTGTTTCCCGAACTAGC	GGATGCAAATTTTGCTAGTTCGGGAAACAATAGATAGATAGTATCGCTGAGCAGTC	TCGTGTATATTCCATCCATTCAATCCATCACCAGAGACTGCTCAGCGATACTATC	TATCGCTGAGCAGTCTCTGG	CGATGATGATGATGCTGATG		generation of RT: primer extension RT_TOP + RT_BOT
Ed met28	2	MET28	CPAR2_702260	CPAR2_702260::StopTAG/CPAR2_702260::StopTAG	CCAaacagtcgcagctggtgcat	AACatgcaccagctgcgactgtt	CtccttatactccatccgtgtataccaatgGGATCATTACCATTCCCGAGTAGATA	ctgcgccagatgcaacagtcgcagctggtgCTATCTATCTACTCGGGAATGGTAA	cctcctaccaacatccacta	CTCGGGAATGGTAATGATCC		screening of transformants: screenprimer_FWD + screenprimer_REV
Ed met4/Ed met28	2	MET4 and MET28	CPAR2_402070	CPAR2_402070::StopTAG/CPAR2_402070::StopTAG; CPAR2_702260::StopTAG/CPAR2_702260::StopTAG	MET28 editing in the background of the MET4 eited strain. Same oligos as the individual Ed met28 strain used.
			CPAR2_702260
Deletion strains
Strain Name			CPAR ID	Genotype	gRNA_TOP	gRNA_BOT	800700-up2	800700-dw2	800700-TAG-fwd2	800700-TAG-rev2		generation of guide RNA: gRNA_TOP + gRNA_BOT
prk1Δ	1	PRK1	CPAR2_800700	cpar2_800700::TAG/cpar2_800700::TAG	same as for the edited strain	same as for the edited strain	cccactttcaattctacccc	tggtgtacaagatcaagtgc	CACTTATTGAAAGCTCCCGAacatgtctagcattgaatacac	TCGGGAGCTTTCAATAAGTGtatgctgtggcctctaagaag		Fusion PCR primers
							702260-up	702260-dw	702260-TAG-fwd	702260-TAG-rev		1) orf-up + orf -TAG-rev, template gDNA CLIB214; 2) orf-TAG-FWD + orf-dw, template gDNA CLIB214; 3) fusion of 1 + 2 with orf-up + orf-dw
met28Δ	2	MET28	CPAR2_702260	cpar2_702260::TAG/cpar2_702260::TAG	CCAaacagtcgcagctggtgcat	AACatgcaccagctgcgactgtt	ctgtagacatgccaatgacc	cctcatgaactgaactgttg	GGATCATTACCATTCCCGAGaaaaggatgagggtttttta	CTCGGGAATGGTAATGATCCttcttaagtagtggatgttgg		screening of transformants: orf-up + orf-dw
met4Δ/met28Δ	1	MET4 and MET28	CPAR2_402070	leu2::FRT/leu2::FRT, his1::FRT/his1::FRT, cpar2_402070::LEU2/cpar2_402070::HIS1; cpar2_702260::TAG/cpar2_702260::TAG	MET28 deletion in the background of the MET4 deleted strain. Same oligos as the individual met28Δ/Δ strain used.
			CPAR2_702260
Complemented strains													generation of RT: RT-FWD + RT-DW from CLIB214 gDNA
Strain Name		Gene	CPAR ID	Genotype	gRNA_TOP	gRNA_BOT	compMET4-F	compMET4-R				generation of guide RNA: gRNA_TOP + gRNA_BOT
												generation of RT: PCR amplification from CLIB214 (comp orf-F + comp orf-R)
cMET4	1	MET4	CPAR2_402070	CPAR2_402070/CPAR2_402070	CCACGCTGAGCAGTCTCTGGTGA	AACTCACCAGAGACTGCTCAGCG	ACGAAGATGATGGGGAAGAC	ATTGTTGGCATGGCTCAGCA				sequencing (see primers below)
							compPRK1-F	compPRK1-R
cPRK1	2	PRK1	CPAR2_800700	CPAR2_800700/CPAR2_800700	CCATGGCAACACCAATCGTCACT	AACAGTGACGATTGGTGTTGCCA	CCAGCAACAGTATGAAGTGC	CTCTGTATTGCGGTGTTGTG
					gRNA_TOP	gRNA_BOT	cMET28_TOP	cMET28_BOT	compMET28-2-F	compMET28-2-R	compMET28-fusionF	generation of guide RNA: gRNA_TOP + gRNA_BOT
cMET28	2	MET28	CPAR2_702260	CPAR2_702260 (T393C; T396T; A399T)/CPAR2_702260 (T393C; T396T; A399T)	CCAgtatacacggatggagtata	AACtatactccatccgtgtatac	ACTGCCAACACAGCTACTATTCCATCCCCACATTCAGTAGCGTCTACTCCTTACACACCT	CAGATGCAACAGTCGCAGCTGGTGCATTGGTATACACGGAAGGTGTGTAAGGAGTAGACG	agctgcgactgttgcatctg	ggttgagtgactgtatgggg	actgccaacacagctactat	Fusion PCR primers
												1) primer extension cMET28_TOP + cMET28_BOT; 2) comp-MET28-2 F + comp-MET28-2-R, template gDNA CLIB214); fusion of 1 + 2 with compMET28-fusionF + compMET28-2-R
												sequencing (see primers below)
Sequencing primers for the edited/complemented MET4 and MET28 alleles:
compMET4-F	ACGAAGATGATGGGGAAGAC
compMET4-R	ATTGTTGGCATGGCTCAGCA
compMET28-F	GTTCAGTGGAGCAGCTAATG
compMET28-R	TTTTCTTCCAATTCCCTGGC
Sequencing primers for the cPRK1 allele
compPRK1-F	CCAGCAACAGTATGAAGTGC
compPRK1-R	CTCTGTATTGCGGTGTTGTG
CRISPR-Cas9 editing in additional C. parapsilosis strains
Parent: C. parapsilosis 02-203
Strain Name	Lineages	Gene	CPAR ID	Genotype	OLIGOS same as above
02-203 Ed met4	2	MET4	CPAR2_402070	CPAR2_402070::StopTAG/CPAR2_402070::StopTAG
02-203 Ed met28	2	MET28	CPAR2_702260	CPAR2_702260::StopTAG/CPAR2_702260::StopTAG
02-203 Ed met4/Ed met28	2	MET4 and MET28	CPAR2_402070	CPAR2_402070::StopTAG/CPAR2_402070::StopTAG; CPAR2_702260::StopTAG/CPAR2_702260::StopTAG
			CPAR2_702260
Parent: C. parapsilosis 81-042
Strain Name	Lineages	Gene	CPAR ID	Genotype	OLIGOS same as above
02-203 Ed met4	2	MET4	CPAR2_402070	CPAR2_402070::StopTAG/CPAR2_402070::StopTAG
02-203 Ed met28	2	MET28	CPAR2_702260	CPAR2_702260::StopTAG/CPAR2_702260::StopTAG
02-203 Ed met4/Ed met28	2	MET4 and MET28	CPAR2_402070	CPAR2_402070::StopTAG/CPAR2_402070::StopTAG; CPAR2_702260::StopTAG/CPAR2_702260::StopTAG
			CPAR2_702260
Parent: C. parapsilosis CDC179
Strain Name	Lineages	Gene	CPAR ID	Genotype	OLIGOS same as above
02-203 Ed met4	2	MET4	CPAR2_402070	CPAR2_402070::StopTAG/CPAR2_402070::StopTAG
02-203 Ed met28	2	MET28	CPAR2_702260	CPAR2_702260::StopTAG/CPAR2_702260::StopTAG
02-203 Ed met4/Ed met28	2	MET4 and MET28	CPAR2_402070	CPAR2_402070::StopTAG/CPAR2_402070::StopTAG; CPAR2_702260::StopTAG/CPAR2_702260::StopTAG
			CPAR2_702260
Generation of CRISPR-Cas9 mutant in C. tropicalis
Edited strains
Strain Name	Lineages	Gene	CTRG1 ID	Genotype	gRNA_TOP	gRNA_BOT	RT_TOP	RT_BOT	SCREENPRIMER_FWD	SCREENPRIMER_REV		generation of guide RNA: gRNA_TOP + gRNA_BOT
Ed met28	2	MET28	CTRG1_05070	CTRG1_05070::StopTAG/CTRG1_05070::StopTAG	CCACTAGTTGTGATTGGTTGTGA	AACTCACAACCAATCACAACTAG	ACTGATTTCCAATTTACAAATATCACTCCACCTCAACAAGAACAATTTACTATTCCTTCATAGATAGATAGGGATCATTACCATTC	TTGAGCAGCCACTGTTGCTACTTTGTCTTCAACTTTTTTATTACTAGTTGTGATTGGTTGCTCGGGAATGGTAATGATCCCTATC	CTCTCTCACTCATATTGCGT	CTCGGGAATGGTAATGATCC		screening of transformants: screenprimer_FWD + screenprimer_REV
