# Supplementary material for: Alternative sulphur metabolism in the fungal pathogen Candida parapsilosis
Source: Research Square preprint supplement (doi:10.21203/rs.3.rs-3951443/v1), 2024-02-21
Supplement: Supplementary file 3 [file daa6345cf412a9b8101d761b.xlsx]

## Sheet: DEG_combined_readcount
GENE	GENE NAME CP	WT-logFC	WT-PVal	WT-readA	WT-readB	MUT1-logFC	MUT1-PVal	MUT1-readA	MUT1-readB	MUT2-logFC	MUT2-PVal	MUT2-readA	MUT2-readB	DUAL-logFC	DUAL-PVal	DUAL-readA	DUAL-readB	CALB	SCER	SCER Description
CPAR2_203620	JLP1	9.02432	2.26555e-153	125	63422	4.49151	1.14434e-60	81	2034	8.24677	1.72515e-54	145	61932	-0.118936	0.890097	213	229	orf19.1167	JLP1	Fe(II)-dependent sulfonate/alpha-ketoglutarate dioxygenase, involved in sulfonate catabolism for use as a sulfur source; contains sequence that resembles a J domain (typified by the E. coli DnaJ protein); induced by sulphur starvation
CPAR2_806900		8.97888	1.83696e-50	45	22186	0.839646	0.455205	34	69	8.74524	2.72833e-78	69	39314	-0.675494	0.634496	104	76	orf19.355
CPAR2_404910		4.5038	2.50806e-06	7	155	5.16339	0.0459508	0	22	8.55153	1.50643e-27	11	5581	0.0787543	0.961867	42	51	orf19.1639
CPAR2_104940		7.92367	1.74663e-68	63	14951	-0.724343	0.449606	155	107	5.77074	1.18413e-33	164	12492	-0.615059	0.634496	242	188	orf19.2197
CPAR2_808310		0.995027	0.984341	6070	11627	7.34495	9.40292e-09	20	3453	1.28613	0.231103	11	37	2.32148	0.152379	20	114	No C.albicans ortholog
CPAR2_402070	MET4	7.11939	0	656	88754	6.53382	0.00032235	0	57	4.18046	1.71313e-10	584	15618	0.397333	0.946722	4	6	orf19.5312 (MET4)	MET4	Leucine-zipper transcriptional activator, responsible for the regulation of the sulfur amino acid pathway, requires different combinations of the auxiliary factors Cbf1p, Met28p, Met31p and Met32p
CPAR2_806190	SPO11	4.59164	3.74166e-38	70	1642	7.0977	1.69124e-101	64	9658	0.612581	0.531548	39	87	-0.0891192	0.935414	129	141	orf19.3589 (SPO11)	SPO11	Meiosis-specific protein that initiates meiotic recombination by catalyzing the formation of double-strand breaks in DNA via a transesterification reaction; required for homologous chromosome pairing and synaptonemal complex formation
CPAR2_102120		-0.0956434	0.992929	1678	1520	2.48724	8.09851e-17	2207	14149	6.79637	3.66592e-32	2260	326221	3.44814	0.000280113	3467	44897	No C.albicans ortholog
CPAR2_102200		-0.866867	0.0210775	480	256	3.14163	3.29373e-16	1559	15725	6.72949	1.04029e-20	1365	178224	3.41688	0.000117632	690	8786	orf19.265
CPAR2_700920		1.69792	0.86795	6984	21763	0.163545	0.874416	1768	2332	-6.47625	NA	34830	581	-0.01326	0.990107	254	296	No C.albicans ortholog
CPAR2_402140	OPT7	6.33553	1.50905e-83	821	64892	5.22529	3.41666e-186	1037	43320	2.96905	4.20169e-08	1181	12485	0.26497	0.734277	573	788	orf19.5673 (OPT7)
CPAR2_203530	MET3	4.52399	3.74166e-38	3155	71062	6.29569	1.75403e-259	2071	181470	1.69641	3.57972e-10	997	4320	0.0298605	0.94787	3188	3803	orf19.5025 (MET3)	MET3	ATP sulfurylase, catalyzes the primary step of intracellular sulfate activation, essential for assimilatory reduction of sulfate to sulfide, involved in methionine metabolism
CPAR2_702100		6.17525	1.00104e-114	737	51813	0.547535	0.131195	1036	1676	5.32752	8.32548e-43	1486	81724	0.11385	0.862307	367	463	orf19.6398
CPAR2_701230		-6.16898	3.45304e-32	45588	610	-5.34979	7.3424e-67	12667	346	-0.151631	0.814233	289	343	-4.70436	4.9734e-57	5737	250	orf19.7314 (CDG1)
CPAR2_400120	SUL2	6.04576	4.35129e-160	549	35294	4.24545	4.63254e-78	499	10535	3.97052	1.25295e-18	417	9357	0.0092723	0.988705	1026	1198	orf19.2738 (SUL2)	SUL1	High affinity sulfate permease of the SulP anion transporter family; sulfate uptake is mediated by specific sulfate transporters Sul1p and Sul2p, which control the concentration of endogenous activated sulfate intermediates
CPAR2_304080	MET14	3.91284	9.60905e-13	1241	18368	5.93768	2.95087e-85	2462	168412	0.846941	0.117081	1693	4131	-0.244549	0.739104	5134	5115	orf19.946 (MET14)	MET14	Adenylylsulfate kinase, required for sulfate assimilation and involved in methionine metabolism
CPAR2_702970		5.91007	1.76875e-34	74	4330	1.38867	0.0118489	62	183	3.4512	1.24573e-15	72	1091	-0.813645	0.683007	52	35	orf19.6522
CPAR2_300630		0.420229	0.956047	65504	84653	-3.31936	1.24208e-56	106515	11908	-5.86091	9.10617e-32	88402	1938	-3.88361	6.18849e-42	26412	2100	No C.albicans ortholog
CPAR2_500140		1.37158	8.82451e-05	535	1344	5.80951	3.45663e-168	885	55086	0.542235	0.314831	631	1195	0.084635	0.882185	1113	1375	orf19.3105
CPAR2_210110		5.77829	0.001441	25	1313	1.24161	0.573365	14	36	0.850728	0.593	19	48	-0.689905	0.54212	650	475	No C.albicans ortholog
CPAR2_402910		-0.462262	0.984943	217498	152102	-5.67624	1.11913e-64	4281	92	0.256877	0.483128	3149	5005	-0.256004	0.78367	8499	8442	No C.albicans ortholog
CPAR2_603010	MDR1B	1.83895	0.000344426	1384	4836	2.75187	1.60412e-06	433	3325	5.66973	5.46258e-28	483	34042	1.86327	2.14345e-14	927	3976	No C.albicans ortholog
CPAR2_601925		-0.470095	0.992929	10	7	0.336636	0.940566	5	7	5.19837	0.0018496	1	54	1.12242	0.839002	4	9	orf19.5520 (ASG7)
CPAR2_402900		-0.830381	0.72509	59372	32220	-5.18351	3.40778e-42	2428	73	1.41572	9.12923e-05	2158	7550	1.12383	0.101826	2239	5883	orf19.5635 (PGA7)
CPAR2_807040		3.71813	1.36235e-20	1039	13244	5.17125	5.27231e-07	2999	120905	0.610153	0.191049	690	1482	-0.243263	0.634496	33814	32819	orf19.7350 (RCT1)	YNL208W	Protein of unknown function; may interact with ribosomes, based on co-purification experiments; authentic, non-tagged protein is detected in purified mitochondria in high-throughput studies; potential orthologs found in other fungi
CPAR2_402150	SMA2	5.14329	9.60971e-33	130	4491	4.44791	1.07333e-57	255	6197	2.86955	1.57347e-15	180	1807	0.153906	0.848901	251	324	orf19.5644	SMA2	Meiosis-specific prospore membrane protein; required to produce bending force necessary for proper assembly of the prospore membrane during sporulation
CPAR2_702960	SOA1	5.14034	7.76557e-25	486	16644	0.899837	0.00805652	603	1275	2.49971	1.85675e-05	802	6385	-0.233618	0.739193	704	701	orf19.6520	YIL166C	Putative protein with similarity to the allantoate permease (Dal5p) subfamily of the major facilitator superfamily; mRNA expression is elevated by sulfur limitation; YIL166C is a non-essential gene
CPAR2_406090		0.324376	0.987174	75	92	0.843756	0.251367	80	159	5.1394	1.1747e-14	59	2675	1.16253	0.119364	228	600	No C.albicans ortholog
CPAR2_806380	MET10	3.96037	3.72264e-46	4899	74547	5.09459	2.39168e-207	4753	181075	0.972159	0.00724846	2529	6672	0.166922	0.64349	2914	3802	orf19.4076 (MET10)	MET10	Subunit alpha of assimilatory sulfite reductase, which converts sulfite into sulfide
CPAR2_104830	ECM17	4.22686	3.50277e-10	1846	34030	5.06577	3.33379e-233	2909	109314	1.11341	0.0014572	2186	6414	-0.314801	0.429999	4648	4391	orf19.4099 (ECM17)	MET5	Sulfite reductase beta subunit, involved in amino acid biosynthesis, transcription repressed by methionine
CPAR2_202870		1.06079	0.971185	3134	6295	3.10089	3.64682e-16	106	1006	5.06463	5.71403e-12	150	6216	2.20255	0.0100098	128	721	No C.albicans ortholog
CPAR2_402160	MET15	4.43899	0	7710	162791	4.98548	1.89529e-272	6567	231554	3.15994	4.78686e-23	6181	76003	0.541299	0.37323	3180	5301	orf19.5645 (MET15)	MET17	Methionine and cysteine synthase (O-acetyl homoserine-O-acetyl serine sulfhydrylase), required for sulfur amino acid synthesis
CPAR2_210690	MET1	3.0355	2.02141e-19	1238	9930	4.96194	1.74215e-91	1222	42183	0.704904	0.327897	872	1972	0.19889	0.78367	1778	2357	orf19.5811 (MET1)	MET1	S-adenosyl-L-methionine uroporphyrinogen III transmethylase, involved in the biosynthesis of siroheme, a prosthetic group used by sulfite reductase; required for sulfate assimilation and methionine biosynthesis
CPAR2_804290	YMC2	2.70761	5.27998e-76	1324	8435	4.95946	1.26928e-175	1167	40351	1.00216	0.00177331	850	2316	-0.264186	0.594915	1724	1686	orf19.4733 (YMC2)
CPAR2_103090		4.8373	3.83833e-50	2600	72787	-1.06085	2.59393e-10	13953	7466	1.69977	0.000275828	16429	70388	0.273902	0.642236	833	1158	orf19.1608
CPAR2_407220		4.77385	6.64865e-48	869	23145	0.352978	0.323308	1393	1998	3.68916	5.17389e-24	1356	23254	0.696983	0.122892	447	847	orf19.1366
CPAR2_201190		1.08748	0.528062	30	62	4.69529	1.41556e-05	264	7528	1.28544	0.102935	67	214	-0.289631	0.833515	130	127	orf19.7283
CPAR2_200890		1.23269	0.115509	46	105	1.18542	0.0342568	151	378	2.10823	0.00248464	175	1030	4.69394	0.0041387	3	90	No C.albicans ortholog
CPAR2_213700	DUR4	3.93582	2.51564e-12	160	2384	0.263064	0.700435	179	240	4.68984	3.07869e-22	165	5694	0.24569	0.849739	217	297	orf19.5677 (DUR4)
CPAR2_807890		4.6895	6.92088e-15	95	2384	1.55069	0.00219379	117	383	-0.480586	0.547951	142	133	-0.254079	0.634496	652	634	No C.albicans ortholog
CPAR2_805590	PRX1	4.65758	3.7192e-32	114770	2805209	4.6732	3.68411e-138	145066	4191019	1.07958	0.0472437	152634	436042	0.0621322	0.928439	62471	74672	orf19.5180 (PRX1)	PRX1	Mitochondrial peroxiredoxin (1-Cys Prx) with thioredoxin peroxidase activity, has a role in reduction of hydroperoxides; reactivation requires Trr2p and glutathione; induced during respiratory growth and oxidative stress; phosphorylated
CPAR2_212620	AGP3	4.67112	1.45864e-153	817	20319	3.90444	1.56819e-39	678	11281	3.40925	4.82521e-11	432	6492	0.075581	0.90527	1016	1249	orf19.3795 (AGP3)	AGP3	Low-affinity amino acid permease, may act to supply the cell with amino acids as nitrogen source in nitrogen-poor conditions; transcription is induced under conditions of sulfur limitation; plays a role in regulating Ty1 transposition
CPAR2_203100	SEO1	4.60398	2.04414e-152	1358	32213	4.64871	1.82145e-80	880	24579	3.61575	1.28541e-47	667	11135	0.0103811	0.985148	1129	1327	orf19.700 (SEO1)	SEO1	Putative permease, member of the allantoate transporter subfamily of the major facilitator superfamily; mutation confers resistance to ethionine sulfoxide
CPAR2_104530		4.62835	9.22665e-110	1033	24939	3.34162	1.00023e-110	2339	26530	2.96988	2.0066e-23	3507	37368	0.0294673	0.960272	832	1000	orf19.541
CPAR2_402890		-0.930464	0.789085	81	41	-3.5902	0.463589	6	0	4.4744	0.0166866	1	34	2.46714	0.616163	2	13	No C.albicans ortholog
CPAR2_600590		-1.53865	0.197518	14581	4936	0.324737	0.561846	55019	77570	4.4641	7.99807e-18	32894	907745	3.30231	6.19304e-12	4831	54241	orf19.716
CPAR2_400330		0.865041	0.154287	406	721	4.44632	1.87394e-40	292	7143	1.37102	0.00229094	344	1205	-0.417899	0.548234	1588	1420	orf19.2713	MSH5	Protein of the MutS family, forms a dimer with Msh4p that facilitates crossovers between homologs during meiosis; msh5-Y823H mutation confers tolerance to DNA alkylating agents; homologs present in C. elegans and humans
CPAR2_808120		-0.156453	0.992929	6689	5865	-3.40253	8.31142e-18	1353	143	4.44271	9.80723e-31	924	26641	0.529229	0.115196	12085	20146	orf19.1930 (CFL5)	FRE3	Ferric reductase, reduces siderophore-bound iron prior to uptake by transporters; expression induced by low iron levels
CPAR2_403830		0.76354	0.342396	1300	2138	4.43843	1.11687e-175	1078	26234	1.47553	0.0129904	913	3440	0.179389	0.749126	2006	2614	orf19.2681 (RBT7)
CPAR2_207600		0.330363	0.867569	181	221	1.40675	0.000453405	198	587	4.43347	3.94599e-18	258	7520	1.14892	0.0645999	365	963	orf19.4791
CPAR2_800760	PTR2	4.42754	9.69287e-18	531	11202	0.533274	0.102203	1066	1725	2.59298	1.48076e-16	855	7136	-0.616609	0.463939	1234	965	orf19.2583
CPAR2_503120		-0.927449	0.00448022	9034	4617	-0.962525	1.83923e-06	11620	6684	-4.39202	9.20097e-32	12259	763	-0.778265	0.185051	3936	2752	orf19.1667.1	COA4	Twin Cx(9)C protein involved in cytochrome c oxidase assembly or stability; localizes to the mitochondrial intermembrane space via the Mia40p-Erv1p system; interacts genetically with CYC1 and with cytochrome c oxidase assembly factors
CPAR2_202880		1.13465	0.810233	697	1478	2.63835	1.33812e-46	493	3458	4.35262	3.10719e-15	383	10108	2.56052	7.61849e-05	97	680	No C.albicans ortholog
CPAR2_212720		-1.17684	0.0854665	3816	1652	2.22112	9.16954e-21	2310	12249	4.30448	1.02028e-16	1484	37525	1.13947	0.043063	1779	4675	orf19.4506 (LYS22)
CPAR2_103490		-0.688854	0.514324	6306	3830	1.06524	0.0100492	8747	20457	4.30173	2.39656e-09	4565	111189	2.28458	2.52886e-07	1787	10193	orf19.276	ATF2	Alcohol acetyltransferase, may play a role in steroid detoxification; forms volatile esters during fermentation, which is important for brewing and winemaking
CPAR2_407230		0.403471	0.881887	124	160	1.37226	0.000214102	301	878	4.18601	7.21511e-10	253	5614	0.835274	0.163312	320	671	No C.albicans ortholog
CPAR2_500330		-0.00839265	0.999	28788	27712	-0.468709	0.0170489	43606	35441	-4.1737	2.3349e-13	48280	3435	-2.12386	4.60591e-27	3855	1040	No C.albicans ortholog
CPAR2_807700		2.31606	0.120606	94	449	-4.16832	NA	3070	192	1.43682	0.0605334	64	233	0.725231	0.469461	172	324	orf19.1652 (POX1-3)	POX1	Fatty-acyl coenzyme A oxidase, involved in the fatty acid beta-oxidation pathway; localized to the peroxisomal matrix
CPAR2_301450		1.16709	0.357923	469	1021	-0.69704	0.346231	725	500	4.16573	9.59144e-16	457	11014	0.0879557	0.892615	758	939	orf19.113 (CIP1)
CPAR2_808400		1.28736	0.980219	3	7	0.00890113	0.997659	20	22	4.16171	0.00106024	7	157	0.808386	0.619517	38	77	No C.albicans ortholog
CPAR2_403670		0.600326	0.0682986	631	932	4.13236	9.93891e-132	795	15602	1.19397	0.00106606	653	2011	0.319532	0.703835	344	500	No C.albicans ortholog
CPAR2_805340		2.01284	5.54034e-19	350	1376	4.09868	4.42347e-99	461	8877	0.481881	0.35263	391	705	-0.241694	0.689102	912	912	No C.albicans ortholog
CPAR2_601950		2.52268	2.34421e-36	6761	37764	4.09777	8.28054e-59	4387	83403	-0.342385	0.621047	3110	3102	0.261224	0.703835	1393	1935	No C.albicans ortholog
CPAR2_600640		-0.759868	0.798249	75	43	4.05072	1.44487e-47	90	1666	-0.384903	0.693991	67	69	0.0262878	0.967269	463	554	No C.albicans ortholog
CPAR2_405440		4.02043	2.52286e-44	1097	17337	0.328426	0.293188	1287	1824	3.51557	7.85389e-26	1541	24022	0.368482	0.469461	818	1229	orf19.5978
CPAR2_600600		-1.22017	0.152923	7393	3113	0.121715	0.831442	20448	24916	4.00396	9.30786e-13	13075	262282	1.67575	0.000127991	6103	23263	orf19.715
CPAR2_203640		1.4344	1.471e-08	3639	9606	3.98813	1.17672e-109	3241	57151	0.728257	0.0723912	2526	5815	0.28568	0.702717	2141	2975	orf19.1159
CPAR2_601680		0.746908	0.894508	205	338	-2.15672	8.48791e-09	702	174	-3.97581	3.17066e-12	598	49	0.995733	0.570173	43	98	orf19.5524
CPAR2_700300		0.986835	0.853458	2414	4554	-3.9676	NA	17300	1241	0.361078	NA	1940	3359	-0.355493	0.738006	475	441	No C.albicans ortholog
CPAR2_403610	SPO75	1.05729	8.84705e-07	761	1541	3.95674	1.88125e-85	964	16788	0.95653	0.000517911	711	1857	0.267448	0.634496	1270	1760	orf19.1311 (SPO75)	SPO75	Meiosis-specific protein of unknown function, required for spore wall formation during sporulation; dispensable for both nuclear divisions during meiosis
CPAR2_701420		0.548922	0.0594632	2190	3123	3.9224	8.77548e-30	4439	74960	1.84555	7.48385e-06	2886	13964	0.285909	0.634496	821	1182	orf19.7310	MSC1	Protein of unknown function; mutant is defective in directing meiotic recombination events to homologous chromatids; the authentic, non-tagged protein is detected in highly purified mitochondria and is phosphorylated
CPAR2_403880		-0.503531	0.300423	1347	926	1.57666	6.30764e-09	4550	14993	3.9172	1.31714e-17	4328	84306	1.92778	3.0651e-07	1948	8723	No C.albicans ortholog
CPAR2_803010		0.0894784	0.992929	1916	1991	0.983284	0.0158645	2237	5016	3.91227	1.22108e-09	1981	39841	0.922687	0.038569	1652	3740	orf19.3221 (CPA2)	CPA2	Large subunit of carbamoyl phosphate synthetase, which catalyzes a step in the synthesis of citrulline, an arginine precursor
CPAR2_203590	MUP1	3.7202	1.7392e-64	2077	26730	3.90486	1.04348e-29	1471	24483	2.69408	4.83296e-07	1084	9878	-0.43913	0.618572	2898	2578	orf19.5280 (MUP1)	MUP1	High affinity methionine permease, integral membrane protein with 13 putative membrane-spanning regions; also involved in cysteine uptake
CPAR2_500770		0.460286	0.797945	79	106	3.89757	1.29349e-24	91	1539	1.79917	0.00207317	50	229	1.01901	0.601917	46	104	No C.albicans ortholog
CPAR2_100300		-0.73635	0.00554531	680	397	0.858214	0.0153722	865	1756	3.8918	5.62207e-09	501	9222	1.02899	0.343153	263	629	orf19.4335 (TNA1)	TNA1	High affinity nicotinic acid plasma membrane permease, responsible for uptake of low levels of nicotinic acid; expression of the gene increases in the absence of extracellular nicotinic acid or para-aminobenzoate (PABA)
CPAR2_207420		-0.395931	0.988692	4472	3347	0.402152	0.269919	6936	10248	3.88521	1.83538e-10	4225	77511	1.49242	0.000369453	2446	8074	orf19.5100 (MLT1)
CPAR2_402640		0.141493	0.993547	14053	14962	-1.13266	0.0581329	5731	2925	-3.88097	1.01561e-11	2313	214	-1.03862	0.123028	265	153	No C.albicans ortholog
CPAR2_300660		-0.173035	0.992929	1945	1691	1.03278	0.00032235	5497	12699	3.84635	1.64296e-17	4609	87187	0.311258	0.680521	7783	11504	orf19.7098	YKL070W	Putative protein of unknown function; expression induced in cells treated with mycotoxins patulin or citrinin; the authentic, non-tagged protein is detected in highly purified mitochondria in high-throughput studies
CPAR2_105370		-0.70606	2.51564e-12	7172	4282	-0.0559708	0.925067	8793	9520	3.84166	4.00146e-07	5523	96062	1.87246	0.000369453	2301	10041	orf19.6852	RMD6	Protein required for sporulation
CPAR2_108950		-0.34667	0.269301	92457	70937	-0.910775	0.00256097	169423	101193	-3.83761	3.01594e-17	200720	18812	-0.501219	0.459718	36616	30538	orf19.3061.1
CPAR2_600460		-0.436101	0.927807	6656	4821	0.129514	0.949371	1932	2376	3.81126	1.29967e-30	1014	18880	0.152183	0.75493	25997	34008	No C.albicans ortholog
CPAR2_105540		3.80182	2.38682e-32	3231	43733	-0.237083	0.501486	4126	3896	1.2435	0.000343222	2694	8661	0.114103	0.82868	1159	1471	No C.albicans ortholog
CPAR2_802720		3.80134	0.000398979	186	2510	0.181593	0.931776	105	136	0.665996	0.389898	64	147	-0.477894	0.0698788	3188	2666	orf19.3232
CPAR2_800150		0.308419	0.899015	622	751	-0.219005	0.847994	868	822	3.74285	6.008e-11	449	8293	-0.563061	0.462919	8405	6768	orf19.2849 (AQY1)	AQY1	Spore-specific water channel that mediates the transport of water across cell membranes, developmentally controlled; may play a role in spore maturation, probably by allowing water outflow, may be involved in freeze tolerance
CPAR2_808370		-0.213036	0.992929	93	78	-3.67385	0.0476382	1915	166	0.526814	0.655047	315	643	-0.426853	0.679111	19673	16790	orf19.6484
CPAR2_200500		1.2043	0.68232	2952	6554	2.49227	1.63797e-10	2990	19230	-3.66326	0.000369122	10754	1223	0.02341	0.96451	673	791	orf19.7596
CPAR2_701500		0.547283	0.531017	13064	18649	0.568618	0.00434802	11476	18958	3.61924	3.73878e-14	8256	131485	2.34538	7.50377e-06	1454	8966	orf19.7297	YHR112C	Protein of unknown function; localizes to the cytoplasm and nucleus; overexpression affects protein trafficking through the endocytic pathway
CPAR2_807180		3.31933	7.15184e-29	2240	21860	-0.607718	0.00557947	2802	2051	3.60753	6.11824e-29	2205	36873	0.189268	0.825119	2286	2945	orf19.7364
CPAR2_100860		0.443433	0.326431	485	642	3.60208	5.3618e-61	484	6585	1.19659	0.0059055	336	1034	0.216906	0.855682	212	283	No C.albicans ortholog
CPAR2_300620		-0.390079	0.709787	89766	66848	-0.0741108	0.868108	125206	133473	-3.60034	2.48276e-14	130628	14326	-2.52543	1.77961e-22	25611	5143	orf19.7077	FRE7	Putative ferric reductase with similarity to Fre2p; expression induced by low copper levels
CPAR2_209360		-0.451573	0.420594	102168	72580	-1.46315	4.51032e-13	59118	23822	-3.59514	4.36784e-13	67229	7223	-0.246425	0.811671	45539	45619	orf19.2310.1 (RPL29)	RPL29	Protein component of the large (60S) ribosomal subunit, has similarity to rat L29 ribosomal protein; not essential for translation, but required for proper joining of the large and small ribosomal subunits and for normal translation rate
CPAR2_200280		-0.0904136	0.992929	72155	66250	-1.44418	1.77997e-14	147350	60014	-3.58886	1.50313e-23	142677	15665	0.00104888	0.997673	5200	6100	orf19.7676 (XYL2)	SOR2	Protein of unknown function; protein sequence is 99% identical to the Sor1p sorbitol dehydrogenase; computational analysis of large-scale protein-protein interaction data also suggests a role in fructose or mannose metabolism
CPAR2_702290		-0.624806	0.0147167	444231	280898	-1.85401	5.07967e-17	616989	188276	-3.5853	1.43893e-10	572496	62476	-0.21925	0.68252	130232	129727	orf19.7048.1 (RPS28B)	RPS28B	Protein component of the small (40S) ribosomal subunit; nearly identical to Rps28Ap and has similarity to rat S28 ribosomal protein
CPAR2_210700		3.57301	1.03061e-09	13	151	-0.413907	0.842227	34	28	2.35993	0.0472998	21	159	-0.312879	0.795871	103	98	No C.albicans ortholog
CPAR2_401740		0.463726	0.374661	6386	8571	-3.54322	1.29974e-13	1472	142	2.52102	2.50189e-07	745	5948	0.3896	0.570173	8658	12974	orf19.1415 (FRE10)
CPAR2_100840		-0.0931681	0.993547	2723	2462	-1.35759	0.135329	86	37	1.75711	0.00183155	69	313	3.52675	0.126095	3	40	No C.albicans ortholog
CPAR2_700850		1.49289	0.323642	1882	5105	3.2419	6.62794e-34	3178	33461	3.50433	5.44783e-06	3133	46787	1.31081	0.0417732	367	1100	orf19.4873
CPAR2_403870		-0.0557179	0.998689	33	31	-0.206673	0.926142	35	34	3.438	2.99048e-08	48	678	0.883613	0.457179	72	158	No C.albicans ortholog
CPAR2_102760	TPO3	1.30086	0.0351364	639	1530	2.21834	2.10194e-06	569	2921	3.43311	1.38432e-06	389	5887	-0.0951317	0.903318	1153	1283	orf19.341
CPAR2_602990		0.101569	0.992929	198388	206185	-0.795804	9.82911e-07	154063	99664	-3.42348	2.49731e-17	178532	22061	-2.13835	1.99199e-26	96031	25863	orf19.3646 (CTR1)	CTR1	High-affinity copper transporter of the plasma membrane, mediates nearly all copper uptake under low copper conditions; transcriptionally induced at low copper levels and degraded at high copper levels
CPAR2_213940	CHA1	1.16205	0.000400231	26635	58038	1.95047	6.65318e-19	13823	59322	3.4226	1.62654e-27	11998	171143	1.81206	3.1076e-40	13664	56101	orf19.1996 (CHA1)
CPAR2_501370		0.932099	0.448477	3832	7177	0.628092	0.0899364	14596	25297	-3.42236	2.35824e-09	14783	1793	0.00425739	0.99469	2307	2682	No C.albicans ortholog
CPAR2_203090		1.46553	3.21993e-05	353	946	2.72944	1.75268e-31	352	2642	3.39591	1.39489e-09	219	2949	0.469443	0.443938	346	555	orf19.699
CPAR2_201160		1.95814	0.00524271	18	68	1.82404	0.00946366	56	226	3.39081	0.000162944	51	714	1.69386	0.604324	17	70	orf19.7279.1
CPAR2_602410		0.735268	0.482395	431	703	1.70197	1.93319e-17	824	3007	3.38455	1.77157e-22	1163	16549	0.501078	0.462919	662	1101	orf19.3443 (OYE2)	OYE2	Conserved NADPH oxidoreductase containing flavin mononucleotide (FMN), homologous to Oye3p with different ligand binding and catalytic properties; may be involved in sterol metabolism, oxidative stress response, and programmed cell death
CPAR2_704280		-0.577448	0.133109	1353	884	0.140276	0.855204	2597	3198	3.37782	6.84472e-14	1701	22642	1.44766	5.52361e-05	703	2217	No C.albicans ortholog
CPAR2_807520		0.582792	0.626436	707	1027	0.905492	0.0271738	436	919	3.35396	2.3444e-10	293	4347	0.188339	0.764268	544	726	orf19.1656
CPAR2_603050		-0.880998	0.428428	2270	1208	-3.3519	1.87731e-14	8776	965	1.13384	0.0366617	3976	12201	-0.450552	0.195391	6827	5773	No C.albicans ortholog
CPAR2_102260		-0.570073	0.789085	8020	5298	-1.72486	2.48555e-11	27355	9100	-3.34734	4.16334e-10	21373	2797	-0.229002	0.659059	4004	4024	orf19.6156	AIM11	Protein of unknown function; null mutant is viable but shows increased loss of mitochondrial genome and synthetic interaction with prohibitin (phb1); contains an intron
CPAR2_203630		0.869003	2.09854e-16	3395	6041	3.34299	2.48546e-96	2874	32401	0.700397	0.0454797	2217	4738	0.0888649	0.836185	3764	4668	orf19.1158	YDR319C	Putative protein of unknown function, identified as an ortholog of the highly conserved FIT family of proteins involved in triglyceride droplet biosynthesis; interacts with Sst2p and Hsp82p in high-throughput two-hybrid screens
CPAR2_103080		0.398416	0.813059	92	118	1.42068	3.44638e-05	186	557	3.32706	1.44207e-06	213	2694	0.815153	0.367422	81	166	orf19.251	HSP31	Possible chaperone and cysteine protease with similarity to E. coli Hsp31; member of the DJ-1/ThiJ/PfpI superfamily, which includes human DJ-1 involved in Parkinson's disease; exists as a dimer and contains a putative metal-binding site
CPAR2_210740		0.317854	0.884174	52815	63896	0.629533	0.0799033	39751	69655	-3.32123	7.00478e-06	52357	7412	-0.833049	0.0104456	8893	5761	orf19.1585 (ZRT2)	ZRT2	Low-affinity zinc transporter of the plasma membrane; transcription is induced under low-zinc conditions by the Zap1p transcription factor
CPAR2_210100		0.00715245	0.999	5242	5099	-3.31694	1.78741e-33	2451	275	0.602455	0.173724	1636	3328	0.428649	0.600513	1536	2344	orf19.4802 (FTH1)	FTH1	Putative high affinity iron transporter involved in transport of intravacuolar stores of iron; forms complex with Fet5p; expression is regulated by iron; proposed to play indirect role in endocytosis
CPAR2_104970		-0.734848	0.215876	32691	19107	-1.19009	1.1041e-06	62156	30047	-3.28745	2.12127e-14	61702	8440	-0.351118	0.570173	19861	18191	orf19.2201	CBP6	Mitochondrial protein required for translation of the COB mRNA; forms a complex with Cbp3p that binds to mt ribosomes near the polypeptide tunnel exit and promotes efficient translation of the COB mRNA; Cbp3p-Cbp6p complex also interacts with newly synthesized cytochrome b (Cobp) and Cbp4p to promote assembly of Cobp into the cytochrome bc1 complex
CPAR2_808170		0.0129758	0.999	2010	1979	0.382476	0.285487	1518	2201	3.27858	6.84472e-14	1126	14492	-0.00187018	0.997466	5818	6950	orf19.6720	YDR090C	Putative protein of unknown function
CPAR2_100740		-0.451357	0.0377274	2960	2108	0.162954	0.784185	8856	11068	3.27205	1.79286e-07	6676	80181	0.883392	0.192408	3849	8540	orf19.4012 (PCL5)	PCL5	Cyclin, interacts with and phosphorylated by Pho85p cyclin-dependent kinase (Cdk), induced by Gcn4p at level of transcription, specifically required for Gcn4p degradation, may be sensor of cellular protein biosynthetic capacity
CPAR2_200220		3.26723	3.7878e-11	502	4706	-1.19405	0.00101683	1400	692	1.6193	3.7906e-06	1676	6972	-0.525969	0.593265	1310	1074	orf19.7666
CPAR2_502800		2.10484	NA	82	337	-3.26549	NA	1024	119	0.528773	0.568124	132	245	0.0965842	0.920951	297	361	orf19.6169 (ATO1)
CPAR2_105990		-0.0192734	0.998689	4678	4488	0.792317	0.0136802	8355	16234	3.26395	1.47871e-08	5673	69094	1.86775	0.000107953	1583	6788	orf19.2988
CPAR2_700570	FTR1	1.11532	2.50665e-09	26544	55911	0.0608616	0.918263	5520	6435	3.25578	2.02803e-10	6875	90649	0.833352	1.32034e-08	30453	63622	orf19.7219 (FTR1)	FTR1	High affinity iron permease involved in the transport of iron across the plasma membrane; forms complex with Fet3p; expression is regulated by iron
CPAR2_806830		0.593783	0.368371	436	638	3.22905	1.03948e-30	332	3541	-0.199283	0.842084	407	490	0.0781166	0.875299	1070	1310	orf19.7381 (AHR1)
CPAR2_500320		0.0340426	0.998689	1303	1291	-0.285052	0.522406	1788	1643	-3.20285	2.63107e-05	1842	252	-1.14711	0.192092	184	97	No C.albicans ortholog
CPAR2_101050		0.132066	0.992929	475	509	-0.564214	0.469425	319	243	3.19587	7.73004e-06	163	2097	0.143866	0.844306	495	629	orf19.3970	NOP19	Ribosome biogenesis factor; nucleolar protein associated with pre-rRNA components of the 90S preribosome, required for cleavage of pre-rRNA at A0, A1 and A2 sites; interacts with RNA helicase Dhr2p and RNA helicase-like protein Utp25p; required for incorporation of Utp25p into preribosomes
CPAR2_806500		0.917729	0.502363	2195	4070	0.305216	0.231997	3389	4670	3.18065	6.47523e-13	2966	37622	0.349269	0.642236	2439	3616	orf19.217	YPR013C	Putative zinc finger protein; YPR013C is not an essential gene
CPAR2_703850		-0.670773	0.0729298	82502	50351	-1.2121	4.58159e-07	86939	42672	-3.17963	5.52889e-09	101465	15045	-0.379643	0.588141	54804	49153	orf19.6696 (TIM9)	TIM9	Essential protein of the mitochondrial intermembrane space, forms a complex with Tim10p (TIM10 complex) that delivers hydrophobic proteins to the TIM22 complex for insertion into the inner membrane
CPAR2_105420		-0.554498	0.101478	3104	2060	0.749202	0.0442078	3447	6549	3.16935	5.61664e-08	3136	35980	1.81129	0.00857852	1056	4538	orf19.771 (LPG20)	YPL088W	Putative aryl alcohol dehydrogenase; transcription is activated by paralogous transcription factors Yrm1p and Yrr1p along with genes involved in multidrug resistance
CPAR2_807840		-0.846254	0.00834632	29022	15744	-1.01069	1.54941e-06	36316	20412	-3.14347	2.49586e-13	41685	6460	-0.2129	0.642236	25912	25841	orf19.6183	TIM8	Mitochondrial intermembrane space protein, forms a complex with Tim13p that delivers a subset of hydrophobic proteins to the TIM22 complex for inner membrane insertion; homolog of human TIMM8A, implicated in Mohr-Tranebjaerg syndrome
CPAR2_806780		0.566051	0.789085	10189	14602	0.13726	0.704472	7356	9051	3.1433	2.83217e-11	6001	75927	0.499522	0.586738	3167	5116	orf19.7385	LEE1	Zinc-finger protein of unknown function
CPAR2_400160		0.848051	0.235345	1082	1903	0.677095	0.231508	325	585	3.14119	8.44726e-05	204	2586	0.295982	0.633947	1775	2533	orf19.2751
CPAR2_208240	GAP4	1.49651	6.72147e-13	2212	6088	0.207202	0.737023	673	871	3.13329	1.01303e-21	580	6915	0.440964	0.0472928	1779	2811	orf19.4456 (GAP4)
CPAR2_500930		-0.417843	0.221944	231291	168566	-1.87031	3.07386e-07	459824	141651	-3.13103	9.18869e-05	478182	72385	-0.623545	0.519388	384414	295596	orf19.1409.1	RPL22B	Protein component of the large (60S) ribosomal subunit, has similarity to Rpl22Ap and to rat L22 ribosomal protein
CPAR2_702160		-0.370507	0.516769	98601	74249	-1.83625	1.82572e-10	107568	33377	-3.1222	4.31097e-05	104557	15646	-0.716001	0.391264	114226	83295	orf19.6403.1 (RPP2A)	RPP2A	Ribosomal protein P2 alpha, a component of the ribosomal stalk, which is involved in the interaction between translational elongation factors and the ribosome; regulates the accumulation of P1 (Rpp1Ap and Rpp1Bp) in the cytoplasm
CPAR2_100940		-0.219446	0.992929	3367	2790	-1.99235	9.71371e-05	298	82	1.1997	0.0267323	196	590	3.11148	0.018565	14	140	No C.albicans ortholog
CPAR2_204310		-0.014664	0.999	3749	3635	-0.189099	0.817894	2934	2915	3.10547	2.28202e-09	2112	23723	-0.524781	0.463939	24209	20249	orf19.1815	TIF6	Constituent of 66S pre-ribosomal particles, has similarity to human translation initiation factor 6 (eIF6); may be involved in the biogenesis and or stability of 60S ribosomal subunits
CPAR2_502550		0.895793	3.93875e-07	630	1140	3.1051	5.71762e-48	658	6315	0.309643	0.485429	470	794	0.310766	0.634496	953	1358	No C.albicans ortholog
CPAR2_603370		-0.101554	0.881138	8745	7927	0.147035	0.591231	6517	8141	3.09766	1.12937e-07	6742	73163	0.302329	0.741214	6681	9920	orf19.6324 (VID27)	VID27	Cytoplasmic protein of unknown function; possibly involved in vacuolar protein degradation; not essential for proteasome-dependent degradation of fructose-1,6-bisphosphatase (FBPase); null mutants exhibit normal growth
CPAR2_104510		-0.0359161	0.998689	162106	152627	-0.683923	0.00616118	170387	120090	-3.07608	7.86762e-12	196082	30357	-0.273924	0.698977	134313	131443	No C.albicans ortholog
CPAR2_301130		3.05949	0.000533574	62	505	0.950746	0.209156	105	228	2.47754	7.48385e-06	114	861	-0.223284	0.78888	223	224	orf19.7056
CPAR2_603590		-2.3137	5.47922e-08	9015	1771	-3.05056	3.16465e-15	3312	437	1.94661	0.000908023	1706	8725	1.19132	0.000577681	260	683	orf19.4212 (FET99)
CPAR2_807690		-0.588574	0.0758496	47395	30678	-0.997823	1.80449e-05	93491	51637	-3.00508	1.31714e-17	93223	15302	-0.218896	0.75493	43087	43107	orf19.1650	TOM6	Component of the TOM (translocase of outer membrane) complex responsible for recognition and initial import steps for all mitochondrially directed proteins; promotes assembly and stability of the TOM complex
CPAR2_205440		0.0382023	0.992929	1223	1224	-0.729834	0.0391454	1846	1241	3.00267	1.8777e-05	1168	11683	0.480185	0.549427	1651	2645	No C.albicans ortholog
CPAR2_105530		1.28912	0.764365	13	31	-2.99869	3.87185e-09	400	56	2.53316	0.000226048	23	175	-0.0197133	0.992281	68	78	orf19.781	DUR3	Plasma membrane transporter for both urea and polyamines, expression is highly sensitive to nitrogen catabolite repression and induced by allophanate, the last intermediate of the allantoin degradative pathway
CPAR2_211390		-0.393862	0.304779	767598	568377	-1.59994	2.54117e-30	1024981	377641	-2.99249	2.59497e-07	1125058	187157	-0.200006	0.712495	637382	641557	orf19.827.1 (RPL39)	RPL36A	N-terminally acetylated protein component of the large (60S) ribosomal subunit, nearly identical to Rpl36Bp and has similarity to rat L36 ribosomal protein; binds to 5.8 S rRNA
CPAR2_106690		0.492722	0.888277	1791	2456	0.17937	0.881045	1021	1311	2.99045	5.62945e-17	519	5729	0.139277	0.754237	3287	4250	orf19.2942 (DIP5)	DIP5	Dicarboxylic amino acid permease, mediates high-affinity and high-capacity transport of L-glutamate and L-aspartate; also a transporter for Gln, Asn, Ser, Ala, and Gly
CPAR2_500130	MET16	1.88558	4.75859e-07	2368	8562	2.98692	2.26666e-84	3272	29068	0.640269	0.0188273	2799	5833	0.123605	0.759748	2637	3342	orf19.3106 (MET16)	MET16	3'-phosphoadenylsulfate reductase, reduces 3'-phosphoadenylyl sulfate to adenosine-3',5'-bisphosphate and free sulfite using reduced thioredoxin as cosubstrate, involved in sulfate assimilation and methionine metabolism
CPAR2_807620		0.577832	0.988023	421	622	-2.98476	2.04759e-31	3463	489	-1.79409	0.0318145	2587	971	-0.331612	0.669519	554	526	orf19.1653
CPAR2_401180		-0.0311969	0.996266	2685	2562	0.696884	0.201489	1145	2104	2.98141	0.000179426	1130	13280	0.591904	0.457485	2669	4585	orf19.4166 (ZCF21)
CPAR2_407210		2.97881	1.41639e-19	1755	13494	0.466797	0.0398614	3544	5484	2.69034	1.32248e-14	3118	26634	-0.107832	0.878146	1993	2152	orf19.1365
CPAR2_304310		-0.332464	0.24912	578387	446713	-1.43469	4.04885e-20	700178	290163	-2.97517	1.73366e-08	766668	128586	-0.386213	0.494911	463110	414504	orf19.6663 (RPS25B)	RPS25B	Protein component of the small (40S) ribosomal subunit; nearly identical to Rps25Ap and has similarity to rat S25 ribosomal protein
CPAR2_808570		0.656636	0.222442	391	600	2.97479	1.41814e-26	514	4492	0.759061	0.118453	327	783	-0.297909	0.652759	1327	1260	orf19.6824
CPAR2_107290		0.511254	0.716483	5399	7535	2.97179	3.04955e-49	7160	63013	1.18238	0.00018084	7278	22282	0.288825	0.666827	5159	7172	orf19.2455	DUG2	Component of glutamine amidotransferase (GATase II); forms a complex with Dug3p to degrade glutathione (GSH) and other peptides containing a gamma-glu-X bond in an alternative pathway to GSH degradation by gamma-glutamyl transpeptidase (Ecm38p)
CPAR2_108440		-0.561047	0.754335	26093	17122	-0.878307	0.000759631	29541	18136	-2.95782	1.84323e-13	36612	6225	-0.726012	0.220498	26504	18619	No C.albicans ortholog
CPAR2_403210		0.476537	0.709787	735	990	2.95774	1.41194e-33	949	8163	-0.842287	0.0307469	873	656	-0.0453826	0.912548	2344	2645	orf19.2762 (AHP1)	AHP1	Thiol-specific peroxiredoxin, reduces hydroperoxides to protect against oxidative damage; function in vivo requires covalent conjugation to Urm1p
CPAR2_106980		-0.176942	0.984943	57062	49244	-0.774073	0.00136644	170152	110474	-2.9538	2.9086e-11	178045	30013	-0.246216	0.690472	29124	28897	orf19.1067 (GPM2)
CPAR2_100640		-0.508011	0.481461	112050	76950	-1.63037	1.09613e-08	119602	42595	-2.94871	1.05849e-05	106993	18177	-0.623834	0.486854	61331	47278	orf19.3942.1 (RPL43A)	RPL43A	Protein component of the large (60S) ribosomal subunit, identical to Rpl43Bp and has similarity to rat L37a ribosomal protein; null mutation confers a dominant lethal phenotype
CPAR2_208530		0.16214	0.992929	16602	17997	-0.839345	0.131101	21039	12983	-2.94753	7.41426e-11	19219	3233	0.36548	0.519388	2562	3867	orf19.4424 (PHO100)
CPAR2_401460	GST2	2.94605	3.1132e-11	2916	21753	0.879482	0.000214679	4960	10369	2.70492	2.74385e-05	8666	78294	0.141206	0.825119	9124	11863	orf19.2693 (GST2)
CPAR2_601520		0.702341	0.213166	177	281	0.248154	0.894874	939	1258	2.94568	0.00467072	1180	12666	1.20136	0.303666	180	510	orf19.5610 (ARG3)	ARG3	Ornithine carbamoyltransferase (carbamoylphosphate:L-ornithine carbamoyltransferase), catalyzes the sixth step in the biosynthesis of the arginine precursor ornithine
CPAR2_406200		-1.87898	0.00713409	68	18	0.551545	0.468431	194	311	2.9378	1.81407e-05	183	1733	0.580864	0.610877	182	328	orf19.1863
CPAR2_204620		0.776963	0.154292	715	1188	2.93544	8.851e-11	635	5476	2.13155	0.00158873	751	4609	0.0800147	0.908687	1379	1708	orf19.720 (GST3)
CPAR2_207320		-0.426209	0.277363	164103	119045	-1.13128	2.89571e-05	151605	76471	-2.93431	3.85e-06	142921	24728	-0.480595	0.539862	138327	117098	orf19.4909.1 (RPL42)	RPL42A	Protein component of the large (60S) ribosomal subunit, identical to Rpl42Bp and has similarity to rat L44 ribosomal protein
CPAR2_201200		0.766096	0.571018	6816	11197	2.93021	1.09436e-14	19969	173202	-0.493737	0.559124	28095	27834	0.222762	0.69509	10894	14702	No C.albicans ortholog
CPAR2_209740		0.017776	0.999	520	516	-0.962304	0.362601	363	210	2.92895	0.00157753	295	3091	0.3025	0.740362	2475	3467	orf19.6873.1	KTI11	Zn-ribbon protein that co-purifies with Dph1 and Dph2 in a complex required for synthesis of diphthamide on translation factor eEF2 and with Elongator subunits Iki3p, Elp2p, and Elp3p involved in modification of wobble nucleosides in tRNAs
CPAR2_401370		-0.818842	0.771563	1960	1090	1.41224	1.88771e-05	34926	104754	-2.92256	9.71204e-06	54035	9284	-1.71748	6.7124e-07	92936	33461	orf19.4674.1 (CRD2)
CPAR2_602610		-0.0660746	0.992929	1406	1309	2.92164	4.06671e-43	1659	13979	0.694397	0.104066	1419	3092	0.321113	0.604649	833	1208	No C.albicans ortholog
CPAR2_406020		0.408826	0.336668	3749	4834	-0.11719	0.836615	4521	4774	2.92083	1.76147e-05	4204	42985	-0.203124	0.652759	35361	36186	orf19.1388	NOP16	Constituent of 66S pre-ribosomal particles, involved in 60S ribosomal subunit biogenesis
CPAR2_806950		0.292494	0.992929	2419	2912	-0.128506	0.908389	1675	1741	2.91257	5.26278e-09	861	8863	-0.194494	0.695132	6716	6860	orf19.6955 (HBR3)	NOB1	Essential nuclear protein involved in proteasome maturation and synthesis of 40S ribosomal subunits; required for cleavage of the 20S pre-rRNA to generate the mature 18S rRNA
CPAR2_304130		-0.0981139	0.992929	352850	319833	-0.425125	0.129566	693706	579859	-2.89552	1.78418e-13	906391	158957	-0.548268	0.620615	327848	264282	orf19.953.1 (COF1)	COF1	Cofilin, promotes actin filament depolarization in a pH-dependent manner; binds both actin monomers and filaments and severs filaments; thought to be regulated by phosphorylation at SER4; ubiquitous and essential in eukaryotes
CPAR2_211200		-0.341925	0.651424	360431	276830	-1.8931	8.72096e-12	332683	101723	-2.89388	0.000895392	387382	69427	-0.253399	0.652759	423556	413131	orf19.838.1 (RPS9B)	RPS9B	Protein component of the small (40S) ribosomal subunit; nearly identical to Rps9Ap and has similarity to E. coli S4 and rat S9 ribosomal proteins
CPAR2_106460		-0.343408	0.911858	276660	211334	-0.460776	0.0380513	236466	192602	-2.8923	7.10284e-17	256233	45411	-0.208991	0.737247	220844	219496	orf19.2937 (PMM1)	SEC53	Phosphomannomutase, involved in synthesis of GDP-mannose and dolichol-phosphate-mannose; required for folding and glycosylation of secretory proteins in the ER lumen
CPAR2_700110		0.0166893	0.999	1070	1055	0.979382	5.75733e-05	857	1895	2.88958	1.04155e-12	436	4282	0.595196	0.378441	660	1173	orf19.2158 (NAG3)
CPAR2_805630		-2.8856	0.000846376	934	122	0.0173435	0.993457	614	688	0.502853	0.593006	90	158	0.377282	0.703433	685	1029	No C.albicans ortholog
CPAR2_701220		-0.346809	0.479815	8343	6388	1.90567	5.6066e-17	6491	27105	2.19583	3.62675e-11	1799	11299	-2.88146	6.39825e-33	5396	855	orf19.7313 (SSU1)	SSU1	Plasma membrane sulfite pump involved in sulfite metabolism and required for efficient sulfite efflux; major facilitator superfamily protein
CPAR2_208430		0.0182805	0.998689	108510	106590	-2.88031	1.30374e-37	27170	4062	0.286775	0.369692	19637	32235	0.768875	0.000194853	15112	29932	orf19.5063 (COI1)
CPAR2_401240		-0.513309	0.0291953	9175	6262	-0.949378	2.27986e-07	11632	6751	-2.87742	5.04331e-08	12292	2270	-0.0981546	0.843642	5810	6216	orf19.4620	TIM12	Essential protein of the inner mitochondrial membrane, peripherally localized; component of the TIM22 complex, which is a twin-pore translocase that mediates insertion of numerous multispanning inner membrane proteins
CPAR2_701510		1.05933	0.186194	2531	5099	-1.83151	NA	3399	1073	2.86355	4.20169e-08	588	5974	-0.329578	0.604324	988	925	orf19.7296
CPAR2_210780		-0.511896	0.651424	11206	7687	-0.90378	7.81617e-05	21962	13101	-2.84804	3.42533e-15	22356	4026	-0.231279	0.634496	7854	7892	orf19.1546	AIM36	Protein of unknown function; null mutant displays reduced respiratory growth and elevated frequency of mitochondrial genome loss; the authentic, non-tagged protein is detected in purified mitochondria in high-throughput studies
CPAR2_804000		0.241248	0.99233	277	320	0.120659	0.916019	273	335	2.84314	6.31205e-10	153	1488	-0.102851	0.876842	1042	1126	orf19.3275
CPAR2_205880		-0.37793	0.11369	181617	136003	-1.88452	3.30029e-09	186972	57346	-2.83449	0.000561041	200377	37619	-0.255763	0.710353	205132	199647	No C.albicans ortholog
CPAR2_211570		0.180935	0.992929	31336	34361	-0.327661	0.250778	21312	19033	-2.83136	1.41296e-14	23366	4359	-0.297778	0.620615	36552	35094	orf19.5797 (PLC2)
CPAR2_503940		0.757749	0.772921	352	585	0.14635	0.850755	450	558	2.8311	1.49097e-08	215	2193	0.134065	0.886096	2513	3123	orf19.5431
CPAR2_806880		0.266614	0.944994	828	967	0.458648	0.124528	1670	2594	2.82348	5.68284e-06	1465	13534	0.892757	0.142652	655	1449	orf19.6950	YDR352W	Putative protein of unknown function
CPAR2_110250		0.453453	0.86795	1193	1595	-1.01929	0.281443	734	408	2.82302	NA	577	5729	-0.42125	0.158693	20746	18211	orf19.2998 (TSR2)	TSR2	Protein with a potential role in pre-rRNA processing
CPAR2_300830		-0.522749	0.235345	16913	11480	-0.808666	5.37795e-05	55263	35021	-2.81482	1.78418e-13	64082	11919	-0.482378	0.588141	31730	26830	orf19.6563.1	COA3	Mitochondrial inner membrane protein that participates in regulation of COX1 translation, Cox1p stabilization, and cytochrome oxidase assembly
CPAR2_702040		0.971614	0.869433	890	1676	0.991645	0.0611351	330	740	-2.81431	2.0545e-08	418	79	0.285337	0.830493	94	134	No C.albicans ortholog
CPAR2_108270		0.0463329	0.993547	7175	7248	0.951594	2.13178e-06	5329	11485	2.81399	1.12723e-20	5491	53222	0.660937	0.0262489	6570	12296	orf19.4531	YOL075C	Putative ABC transporter
CPAR2_403380		0.381207	0.368371	3191	4037	-2.81366	9.34694e-11	968	154	1.77991	0.0310221	600	2858	0.469814	0.458416	2336	3698	orf19.2671
CPAR2_600770		0.991576	1.51258e-14	5104	9883	2.81326	2.70897e-84	5952	46622	0.220392	0.531691	5247	8140	0.0603209	0.863646	4071	4961	orf19.5757	YMR178W	Putative protein of unknown function; green fluorescent protein (GFP)-fusion protein localizes to both the cytoplasm and nucleus and is induced in response to the DNA-damaging agent MMS; YMR178W is not an essential gene
CPAR2_303130		0.427919	0.354635	2598	3395	2.81122	1.31679e-38	2140	16674	1.28183	0.00766414	1488	4678	0.582006	0.0404068	841	1459	No C.albicans ortholog
CPAR2_401060		0.128426	0.992929	1922	2054	0.386811	0.537406	3007	4475	2.80443	6.4454e-05	3762	36097	0.663692	0.153674	1439	2671	orf19.4630 (CPA1)	CPA1	Small subunit of carbamoyl phosphate synthetase, which catalyzes a step in the synthesis of citrulline, an arginine precursor; translationally regulated by an attenuator peptide encoded by YOR302W within the CPA1 mRNA 5'-leader
CPAR2_304270		0.856889	0.575399	97	172	1.27693	0.0134144	151	418	2.79702	6.49101e-06	368	3623	1.41741	0.0138056	172	545	orf19.4309 (GRP2)
CPAR2_802570		-0.438816	0.235345	13594	9769	-0.349121	0.232993	22606	19610	-2.7913	1.08902e-12	20032	3903	-0.486542	0.545907	13953	11949	orf19.2863.1	ERV1	Flavin-linked sulfhydryl oxidase of the mitochondrial intermembrane space (IMS), oxidizes Mia40p as part of a disulfide relay system that promotes IMS retention of imported proteins; ortholog of human hepatopoietin (ALR)
CPAR2_800140		0.7272	0.003204	5204	8409	2.7903	5.48402e-43	5355	41344	0.314598	0.501393	3918	6647	0.170041	0.780157	3934	5061	orf19.2850	ESC1	Protein localized to the nuclear periphery, involved in telomeric silencing; interacts with PAD4-domain of Sir4p
CPAR2_206850		-0.327187	0.59228	31214	24202	-1.17201	1.09162e-08	26636	13394	-2.77484	5.72205e-08	33017	6568	-0.219236	0.720659	17826	17765	No C.albicans ortholog
CPAR2_202900		-0.52727	0.144768	11092	7481	-1.2356	6.27517e-06	22945	11108	-2.76412	2.92458e-07	29533	5738	-0.223956	0.749468	11289	11296	orf19.4967 (COX19)	COX19	Protein required for cytochrome c oxidase assembly, located in the cytosol and mitochondrial intermembrane space; putative copper metallochaperone that delivers copper to cytochrome c oxidase; contains twin cysteine-x9-cysteine motifs
CPAR2_210610	ALP1	2.68673	5.32733e-10	1728	10903	2.75102	3.03975e-37	2663	20005	2.66681	3.50923e-14	693	6113	0.0764631	0.882185	1790	2180	orf19.2337 (ALP1)
CPAR2_201800		-0.407854	0.404616	4351	3191	0.204528	0.759051	4254	5520	2.75036	4.21734e-06	2440	20553	2.00636	0.00152557	684	3112	orf19.5094 (BUL1)
CPAR2_108340		2.74773	0.0137275	69	447	0.791711	0.283829	82	161	0.508709	0.601723	112	208	0.469913	0.780157	55	88	No C.albicans ortholog
CPAR2_206910		1.47362	NA	185	513	-2.74374	0.0109267	12240	2037	-0.896353	0.416817	19492	14440	0.0527117	0.976842	61	73	orf19.5114.1
CPAR2_209410		-0.298068	0.376894	532053	420371	-1.98277	5.80234e-07	541203	157179	-2.74246	0.00072433	592209	118981	-0.557226	0.469461	832918	668880	orf19.3572.3	RPL31B	Protein component of the large (60S) ribosomal subunit, nearly identical to Rpl31Ap and has similarity to rat L31 ribosomal protein; associates with the karyopherin Sxm1p; loss of both Rpl31p and Rpl39p confers lethality
CPAR2_401210		-0.00101898	0.999818	111124	107503	-0.59384	0.00523831	163919	120884	-2.74166	1.16209e-11	170772	32928	-0.111057	0.851522	62922	67517	orf19.4616 (POL30)	POL30	Proliferating cell nuclear antigen (PCNA), functions as the sliding clamp for DNA polymerase delta; may function as a docking site for other proteins required for mitotic and meiotic chromosomal DNA replication and for DNA repair
CPAR2_107780		0.682924	7.2614e-05	1072	1676	2.73442	1.40682e-72	1357	10128	-0.156084	0.718845	1280	1535	-0.406107	0.624553	2066	1847	orf19.430	YPT10	Rab family GTP-binding protein that contains the PEST signal sequence specific for proteolytic enzymes; may be involved in vesicular transport; overexpression leads to accumulation of Golgi-like cisternae with budding vesicles
CPAR2_404470		-0.213416	0.872196	17576	14745	-1.43801	2.04758e-19	27300	11374	-2.73198	1.15661e-05	32121	6594	-0.304727	0.457485	42663	40632	orf19.7409.1	MRPL39	Mitochondrial ribosomal protein of the large subunit
CPAR2_100770		-2.72959	7.23823e-08	24519	3578	-2.15517	2.47373e-23	62284	15572	-0.746071	0.102336	36169	28251	-1.22119	1.9347e-05	927	471	No C.albicans ortholog
CPAR2_302770		0.0258326	0.996266	294	291	0.73648	0.0125036	400	749	2.72257	5.5196e-07	392	3340	0.177979	0.736526	585	767	No C.albicans ortholog
CPAR2_210520		0.185055	0.992929	1069	1191	-0.0385558	0.974097	874	962	2.70584	7.40068e-05	604	5495	0.144053	0.798584	4292	5478	orf19.2330	UTP6	Nucleolar protein, component of the small subunit (SSU) processome containing the U3 snoRNA that is involved in processing of pre-18S rRNA
CPAR2_200010		-0.932742	0.000843169	4780	2442	0.047213	0.944729	6059	7030	2.70548	8.49022e-06	4754	39093	1.71133	1.39595e-05	986	3807	No C.albicans ortholog
CPAR2_701840		-0.766667	0.686709	65	37	0.0375968	0.983637	62	69	2.69945	0.00447391	40	317	0.245814	0.860215	60	82	No C.albicans ortholog
CPAR2_703330		0.18597	0.992929	3193	3557	0.610284	0.0430938	2151	3673	2.69381	1.67239e-12	1416	12226	0.194305	0.782421	1553	2096	orf19.6691	ERC1	Member of the multi-drug and toxin extrusion (MATE) family of the multidrug/oligosaccharidyl-lipid/polysaccharide (MOP) exporter superfamily; overproduction confers ethionine resistance and accumulation of S-adenosylmethionine
CPAR2_700290		0.237126	0.992929	370	419	-2.69168	0.0301552	1449	250	-0.844315	0.413791	324	238	0.601262	0.851979	12	22	orf19.7209
CPAR2_501890		-0.675781	0.0619703	8021	4900	-1.20164	3.82296e-08	12004	5828	-2.69157	3.35264e-13	12090	2508	-0.117508	0.825119	5027	5438	orf19.4299 (MSW1)	MSW1	Mitochondrial tryptophanyl-tRNA synthetase
CPAR2_600110		0.35026	0.968946	4125	5150	-0.240926	0.79663	2222	2132	2.69086	9.7073e-05	1510	13456	-0.288738	0.448441	15541	14906	orf19.76 (SPB1)	SPB1	AdoMet-dependent methyltransferase involved in rRNA processing and 60S ribosomal subunit maturation; methylates G2922 in the tRNA docking site of the large subunit rRNA and in the absence of snR52, U2921; suppressor of PAB1 mutants
CPAR2_801480		-0.0894413	0.992929	4158	3815	0.339208	0.238822	6463	9085	2.68812	1.56764e-06	4757	39087	0.923102	0.0878637	1578	3575	orf19.5720
CPAR2_806420		0.0833381	0.992929	505	521	0.453827	0.236967	446	684	2.68771	4.23336e-06	393	3276	0.594008	0.174283	316	556	orf19.4072 (IFF6)	HBT1	Substrate of the Hub1p ubiquitin-like protein that localizes to the shmoo tip (mating projection); mutants are defective for mating projection formation, thereby implicating Hbt1p in polarized cell morphogenesis
CPAR2_100870		1.43393	0.183014	1140	2970	1.0248	NA	1892	4332	2.68631	3.00044e-09	415	3484	0.581238	0.275025	1070	1896	orf19.3931 (SFC1)	SFC1	Mitochondrial succinate-fumarate transporter, transports succinate into and fumarate out of the mitochondrion; required for ethanol and acetate utilization
CPAR2_600040		0.0235114	0.999	2904	2901	0.761724	0.278686	1822	3488	2.68482	2.83248e-09	1064	9363	-0.265504	0.56421	11673	11447	orf19.5732 (NOG2)	NOG2	Putative GTPase that associates with pre-60S ribosomal subunits in the nucleolus and is required for their nuclear export and maturation
CPAR2_805510		-0.414374	0.289558	6049	4427	-1.4557	3.98432e-11	2090	846	-2.68221	2.66502e-10	3384	703	-0.318452	0.462996	1928	1807	orf19.7080 (LEU2)	LEU2	Beta-isopropylmalate dehydrogenase (IMDH), catalyzes the third step in the leucine biosynthesis pathway
CPAR2_210340		-0.335406	0.6269	20868	16090	-0.949024	0.000353391	35910	20979	-2.68101	7.41426e-11	43933	9064	-0.36485	0.625312	15532	14260	orf19.1483	CMC1	Evolutionarily conserved copper-binding protein of the mitochondrial intermembrane space, may be involved in delivering copper from the matrix to the cytochrome c oxidase complex; contains a twin CX9C motif
CPAR2_108040		0.47429	0.901785	2237	3052	0.0409045	0.971101	1457	1701	2.67988	5.83887e-06	948	8600	0.0473137	0.951787	3654	4304	orf19.59 (REI1)	REI1	Cytoplasmic pre-60S factor; required for the correct recycling of shuttling factors Alb1, Arx1 and Tif6 at the end of the ribosomal large subunit biogenesis; involved in bud growth in the mitotic signaling network
CPAR2_105190		0.664141	0.759153	2118	3289	-0.286259	0.881922	1118	1034	2.67641	0.00103542	700	6271	-0.367383	0.595348	9094	8336	orf19.5198 (NOP4)	NOP4	Nucleolar protein, essential for processing and maturation of 27S pre-rRNA and large ribosomal subunit biogenesis; constituent of 66S pre-ribosomal particles; contains four RNA recognition motifs (RRMs)
CPAR2_804120		0.0520132	0.993547	6414	6470	0.83298	0.0438404	8837	17828	2.66831	0.000162992	11520	101470	0.669502	0.161855	2998	5604	orf19.7469 (ARG1)	ARG1	Arginosuccinate synthetase, catalyzes the formation of L-argininosuccinate from citrulline and L-aspartate in the arginine biosynthesis pathway; potential Cdc28p substrate
CPAR2_803310		-0.120492	0.992929	140124	124920	-0.169934	0.443187	182846	182404	-2.66095	5.91648e-12	197218	40995	-0.386662	0.601496	152494	136051	orf19.2322.3	ERP5	Protein with similarity to Emp24p and Erv25p, member of the p24 family involved in ER to Golgi transport
CPAR2_603600	FET3	1.7363	2.23305e-07	30062	97283	-2.65674	7.5576e-19	5721	1006	2.16986	6.0587e-10	4169	25901	0.872091	4.92052e-05	9721	20405	orf19.4211 (FET3)
CPAR2_207000		0.877632	0.776516	6468	11673	-1.19715	0.000578216	47854	23180	-2.656	5.6201e-13	21753	4514	-0.206414	0.773331	1218	1218	No C.albicans ortholog
CPAR2_300270		-0.442967	0.785567	103469	74435	-1.31351	2.15898e-05	65177	29390	-2.65021	2.84028e-05	55425	11529	-0.265523	0.695148	63535	61956	orf19.7015 (RPP0)	RPP0	Conserved ribosomal protein P0 of the ribosomal stalk, which is involved in interaction between translational elongation factors and the ribosome; similar to rat P0, human P0, and E. coli L10e; phosphorylated on serine 302
CPAR2_803420		-0.519264	0.163384	403528	274545	-1.16897	3.30851e-10	406578	201423	-2.64456	5.49794e-09	427766	90730	-0.346115	0.542042	309591	282014	orf19.6264.4	RPL39	Protein component of the large (60S) ribosomal subunit, has similarity to rat L39 ribosomal protein; required for ribosome biogenesis; loss of both Rpl31p and Rpl39p confers lethality; also exhibits genetic interactions with SIS1 and PAB1
CPAR2_101020	SAH1	-0.142827	0.932877	123292	108816	-0.999624	3.78646e-07	62125	34913	-2.64023	9.78124e-09	58403	12663	0.245494	0.634366	38661	52595	orf19.3911 (SAH1)	SAH1	S-adenosyl-L-homocysteine hydrolase, catabolizes S-adenosyl-L-homocysteine which is formed after donation of the activated methyl group of S-adenosyl-L-methionine (AdoMet) to an acceptor
CPAR2_807980		0.398535	0.396511	216684	278148	-1.1451	0.000227471	414663	212159	-2.63943	5.25469e-05	471256	100946	-0.295194	0.676116	95862	91282	orf19.6745 (TPI1)	TPI1	Triose phosphate isomerase, abundant glycolytic enzyme; mRNA half-life is regulated by iron availability; transcription is controlled by activators Reb1p, Gcr1p, and Rap1p through binding sites in the 5' non-coding region; inhibition of Tpi1p activity by PEP (phosphoenolpyruvate) stimulates redox metabolism in respiring cells; E104D mutation in human TPI causes a rare autosomal disease
CPAR2_401430		-0.193607	0.789085	220675	187488	-1.53896	2.63036e-05	180468	70828	-2.6212	0.000125177	209651	45610	-0.258882	0.646372	222316	216037	orf19.4684.2 (RPL40B)
CPAR2_107990		-0.204331	0.958015	475	400	0.956425	0.00891986	433	956	2.61792	7.88393e-07	470	3782	0.28233	0.672746	2606	3707	No C.albicans ortholog
CPAR2_801300	PGA23	1.26376	0.000900563	751	1754	2.61244	0.000819	2512	17172	1.05852	0.054864	1995	5424	-0.675337	0.0930672	11805	8579	orf19.3740 (PGA23)
CPAR2_206980		-0.00506785	0.999	258	250	-0.277356	0.804465	229	212	2.6121	1.85012e-08	165	1303	0.525573	0.621888	133	220	No C.albicans ortholog
CPAR2_109940		-0.56447	0.0016244	23954	15781	-1.14004	2.59911e-08	46564	23900	-2.60961	8.63529e-06	55897	12486	-0.153462	0.725111	31198	32563	orf19.6008.4	YNL122C	Putative protein of unknown function; green fluorescent protein (GFP)-fusion protein localizes to mitochondria; YNL122C is not an essential gene
CPAR2_106140		0.0785913	0.993547	24494	25372	-0.377389	0.23824	44212	38451	-2.60816	1.21368e-14	47897	10284	0.143222	0.802004	4204	5387	orf19.3672 (GAL10)	GAL10	UDP-glucose-4-epimerase, catalyzes the interconversion of UDP-galactose and UDP-D-glucose in galactose metabolism; also catalyzes the conversion of alpha-D-glucose or alpha-D-galactose to their beta-anomers
CPAR2_213400	STR3	1.19505	8.70272e-09	30035	66864	2.59577	1.24079e-66	47115	319715	0.0869834	0.902021	46007	63280	-0.22964	0.710691	31095	31145	orf19.2092	STR3	Peroxisomal cystathionine beta-lyase, converts cystathionine into homocysteine; may be redox regulated by Gto1p
CPAR2_602950		0.638046	0.338252	157585	239831	-0.101944	0.794301	228680	236984	-2.59031	8.16513e-10	206848	45508	-0.0870885	0.90527	7923	8786	orf19.3651 (PGK1)	PGK1	3-phosphoglycerate kinase, catalyzes transfer of high-energy phosphoryl groups from the acyl phosphate of 1,3-bisphosphoglycerate to ADP to produce ATP; key enzyme in glycolysis and gluconeogenesis
CPAR2_301220		-0.100601	0.992929	284	258	0.293241	0.461989	404	551	2.58995	0.000165129	357	2701	-0.0151624	0.984043	841	974	orf19.6502	YDL114W	Putative protein of unknown function with similarity to acyl-carrier-protein reductases; YDL114W is not an essential gene
CPAR2_402040		0.695977	0.826883	2068	3233	-0.71687	NA	5568	3796	2.58797	1.05567e-06	865	6918	0.557919	0.195391	1657	2849	orf19.5307 (JEN2)
CPAR2_500780		1.22327	0.553933	230	518	0.539447	0.414877	366	594	2.58766	5.25446e-12	235	1970	-0.352644	0.567098	906	815	No C.albicans ortholog
CPAR2_602850		-0.439534	0.0912783	212601	152499	-1.69984	8.98509e-06	278187	98282	-2.58702	7.62374e-05	347203	77259	-0.404668	0.659059	257463	227317	orf19.4193.1 (RPS13)	RPS13	Protein component of the small (40S) ribosomal subunit; has similarity to E. coli S15 and rat S13 ribosomal proteins
CPAR2_800810		0.900878	0.00235178	7572	13785	2.58114	2.97702e-18	11873	78834	-0.551835	0.248699	10195	9188	0.239612	0.661748	3250	4426	orf19.2619 (PHO113)	PHO11	One of three repressible acid phosphatases, a glycoprotein that is transported to the cell surface by the secretory pathway; induced by phosphate starvation and coordinately regulated by PHO4 and PHO2
CPAR2_203600		-1.00328	0.000439181	33498	16287	-1.12923	2.76958e-08	49173	24843	-2.5788	1.27522e-06	52151	11829	-0.101155	0.836185	19081	20628	orf19.5279	MRPL51	Mitochondrial ribosomal protein of the large subunit
CPAR2_203050		-2.57861	7.84039e-15	4057	660	0.440601	0.0831922	4341	6581	0.891156	0.113981	2315	6080	0.34819	0.549427	1503	2242	orf19.2356 (CRZ2)
CPAR2_809030		0.0179014	0.999	1925	1912	-0.403108	0.6563	1285	1097	2.56838	1.94721e-08	780	6319	-0.433911	0.376349	10417	9097	orf19.6766	NOP13	Nucleolar protein found in preribosomal complexes; contains an RNA recognition motif (RRM)
CPAR2_403180		0.228425	0.910599	6624	7533	-0.882893	0.060188	33447	20229	2.56685	1.09529e-08	19182	161895	0.537844	0.68252	155434	246640	orf19.2765 (PGA62)
CPAR2_804850		-0.23667	0.99233	11801	9700	-1.17928	4.46315e-10	48297	23816	-2.56592	4.43021e-08	48483	10526	-0.298187	0.698228	5434	5227	orf19.4842
CPAR2_202920		0.340446	0.855676	531	653	0.608882	0.198871	764	1306	2.55967	1.37255e-10	610	4940	-0.0479864	0.917346	1629	1848	orf19.4970
CPAR2_207610		0.451017	0.0758496	5435	7225	1.18456	7.62248e-06	4170	10663	2.55951	1.93078e-07	3817	30714	0.698594	0.0171765	1793	3399	orf19.4788 (ARG5,6)	ARG5,6	Acetylglutamate kinase and N-acetyl-gamma-glutamyl-phosphate reductase; N-acetyl-L-glutamate kinase (NAGK) catalyzes the 2nd and N-acetyl-gamma-glutamyl-phosphate reductase (NAGSA), the 3rd step in arginine biosynthesis; synthesized as a precursor which is processed in the mitochondrion to yield mature NAGK and NAGSA; enzymes form a metabolon complex with Arg2p; NAGK C-terminal domain stabilizes …
CPAR2_104370		-0.570464	0.120606	409185	268372	-1.75712	2.57177e-25	346111	114209	-2.55627	0.00088469	362823	81517	-0.337058	0.610877	409406	379061	orf19.2232 (RPL11)	RPL11B	Protein component of the large (60S) ribosomal subunit, nearly identical to Rpl11Ap; involved in ribosomal assembly; depletion causes degradation of proteins and RNA of the 60S subunit; has similarity to E. coli L5 and rat L11
CPAR2_109170		-0.380511	0.25067	116338	86807	-2.03771	1.25699e-09	102873	28678	-2.55602	0.00315966	112573	25891	-0.513949	0.432806	229481	189212	orf19.3325.3 (RPS21B)	RPS21B	Protein component of the small (40S) ribosomal subunit; nearly identical to Rps21Ap and has similarity to rat S21 ribosomal protein
CPAR2_106430		-0.152846	0.993547	1071	947	-0.780001	0.402525	725	473	2.54799	0.0135546	484	4017	-0.208014	0.634496	3639	3655	orf19.2934	BUD20	Protein involved in bud-site selection; diploid mutants display a random budding pattern instead of the wild-type bipolar pattern
CPAR2_404860		0.388982	0.801904	2185	2800	-0.0284901	0.980295	1681	1865	2.54011	0.000207699	1252	10197	-0.380828	0.50513	8878	8017	orf19.7422	LCP5	Essential protein involved in maturation of 18S rRNA; depletion leads to inhibited pre-rRNA processing and reduced polysome levels; localizes primarily to the nucleolus
CPAR2_202230		0.0727491	0.993547	2446	2520	-0.398916	0.606634	1850	1587	2.5396	3.76811e-07	1253	10184	0.0255545	0.97235	3931	4632	orf19.494	NAF1	RNA-binding protein required for the assembly of box H/ACA snoRNPs and thus for pre-rRNA processing, forms a complex with Shq1p and interacts with H/ACA snoRNP components Nhp2p and Cbf5p; similar to Gar1p
CPAR2_809010		1.76841	1.29095e-07	321	1069	2.53891	6.37834e-27	6195	40472	0.0812937	0.929985	7822	10329	0.105627	0.897047	500	624	No C.albicans ortholog
CPAR2_107530		-0.458286	0.0412945	26892	19027	-1.23523	0.000240025	50342	24346	-2.53412	1.46219e-06	68665	15783	-0.417066	0.574374	39941	35284	orf19.2472.1
CPAR2_202080		-0.589565	0.0412945	37712	24391	-0.691482	0.00645363	93733	64051	-2.53348	1.17469e-10	97500	21746	-0.657416	0.494911	67864	50737	orf19.514 (SNP3)	LSM2	Lsm (Like Sm) protein; part of heteroheptameric complexes (Lsm2p-7p and either Lsm1p or 8p): cytoplasmic Lsm1p complex involved in mRNA decay; nuclear Lsm8p complex part of U6 snRNP and possibly involved in processing tRNA, snoRNA, and rRNA
CPAR2_301640		1.17396	0.207535	2479	5489	1.08658	0.00093102	1391	3322	2.52922	1.18418e-11	1034	8308	1.05602	0.00123242	1259	3100	orf19.4779	VBA5	Putative transporter of the Major Facilitator Superfamily (MFS); proposed role as a basic amino acid permease based on phylogeny
CPAR2_702740		-0.316856	0.64857	201502	157232	-0.341847	0.301754	214013	186945	-2.52921	7.24463e-14	215157	48784	-0.634348	0.386608	131116	100500	orf19.6472 (CYP1)	CPR1	Cytoplasmic peptidyl-prolyl cis-trans isomerase (cyclophilin), catalyzes the cis-trans isomerization of peptide bonds N-terminal to proline residues; binds the drug cyclosporin A
CPAR2_805150		0.886346	0.00440089	543	976	2.52709	1.35006e-26	412	2654	1.59556	9.12923e-05	470	1926	0.303136	0.578571	611	878	No C.albicans ortholog
CPAR2_600030		0.169096	0.710299	1847	2020	0.386049	0.181497	1489	2192	2.52272	1.06382e-08	1430	10733	-0.0863537	0.881027	2713	3024	orf19.5621	YPR097W	Protein that contains a Phox homology (PX) domain and binds phosphoinositides; the authentic, non-tagged protein is detected in highly purified mitochondria in high-throughput studies
CPAR2_800160		-0.467354	0.41778	5312	3734	-0.0016814	0.997813	8666	9649	2.51853	2.52027e-07	5051	36955	0.761906	0.0433273	3175	6254	orf19.2848	ATG13	Regulatory subunit of the Atg1p signaling complex; stimulates Atg1p kinase activity; required for vesicle formation during autophagy and the cytoplasm-to-vacuole targeting (Cvt) pathway; involved in Atg9p, Atg23p, and Atg27p cycling
CPAR2_108880		1.83451	0.0034851	2037	7134	0.94986	0.00315265	3257	7011	2.51516	4.59436e-05	2401	17244	0.918096	0.00550378	958	2119	orf19.4550	YCR023C	Vacuolar membrane protein of unknown function; member of the multidrug resistance family; YCR023C is not an essential gene
CPAR2_204680		0.404381	0.958015	3341	4341	0.111112	0.910468	2728	3314	2.51087	1.25051e-05	1848	14762	-0.217697	0.734062	10769	10924	orf19.6648 (SDA1)	SDA1	Highly conserved nuclear protein required for actin cytoskeleton organization and passage through Start, plays a critical role in G1 events, binds Nap1p, also involved in 60S ribosome biogenesis
CPAR2_205860		-0.075535	0.993547	376355	345888	-0.23341	0.233137	381431	365053	-2.51018	2.02803e-10	470835	107933	-0.363509	0.634496	207275	187922	orf19.6414.3 (TPM2)	TPM1	Major isoform of tropomyosin; binds to and stabilizes actin cables and filaments, which direct polarized cell growth and the distribution of several organelles; acetylated by the NatB complex and acetylated form binds actin most efficiently
CPAR2_203580		1.98516	1.72395e-13	2226	8595	1.73931	2.7924e-07	6601	24806	2.50845	6.53456e-06	3402	27823	-0.230858	0.754143	7255	7200	No C.albicans ortholog
CPAR2_808260		0.199942	0.932877	65604	73191	-0.935341	2.76385e-07	99376	58100	-2.50418	9.07449e-10	112876	26199	-0.42376	0.604649	37946	33163	orf19.6731.1
CPAR2_600250		0.774956	1.71302e-27	38360	63913	2.50392	6.57036e-38	29981	191068	-0.207781	0.711605	26726	30020	0.0185966	0.969611	20054	23741	orf19.5591 (ADO1)	ADO1	Adenosine kinase, required for the utilization of S-adenosylmethionine (AdoMet); may be involved in recycling adenosine produced through the methyl cycle
CPAR2_602820		-1.05183	0.0585911	6269	2957	-2.5037	1.02702e-20	11389	2279	0.175672	0.870664	10786	16521	-0.277431	0.634496	7378	7178	orf19.4195.1 (FCA1)	FCY1	Cytosine deaminase, zinc metalloenzyme that catalyzes the hydrolytic deamination of cytosine to uracil; of biomedical interest because it also catalyzes the deamination of 5-fluorocytosine (5FC) to form anticancer drug 5-fluorouracil (5FU)
CPAR2_404070		0.19965	0.992929	26	29	1.27579	0.388002	20	54	2.50177	0.0220278	7	55	-0.317689	0.64349	319	297	No C.albicans ortholog
CPAR2_302970		0.511151	0.789085	2930	4085	0.255007	0.763682	3306	4413	2.50155	2.46139e-07	2288	17987	-0.299684	0.621562	15118	14526	orf19.3220	FCF1	Putative PINc domain nuclease required for early cleavages of 35S pre-rRNA and maturation of 18S rRNA; component of the SSU (small subunit) processome involved in 40S ribosomal subunit biogenesis; copurifies with Faf1p
CPAR2_602920		-0.583742	0.945083	12380	8151	-0.695981	0.0185929	34415	23662	-2.49652	5.04331e-08	34948	8096	0.0198219	0.963936	3352	3924	orf19.3656 (COX15)	COX15	Protein required for the hydroxylation of heme O to form heme A, which is an essential prosthetic group for cytochrome c oxidase
CPAR2_702310		-0.410554	0.67019	179	131	0.596924	0.159653	351	598	2.496	5.12483e-12	236	1748	1.20746	0.459718	99	256	orf19.7173
CPAR2_106710		0.201629	0.972354	1909	2136	-0.461431	0.474214	1176	974	2.49252	0.0111073	1353	10661	0.134659	0.850413	6162	7728	orf19.3665	SET6	SET domain protein of unknown function; deletion heterozygote is sensitive to compounds that target ergosterol biosynthesis, may be involved in compound availability
CPAR2_405740		-0.00333541	0.99935	84	82	-1.1723	0.259928	110	55	-2.49192	0.000461634	74	18	-0.528044	0.619699	332	269	No C.albicans ortholog
CPAR2_204650		0.173669	0.992929	1031	1141	-0.375319	0.672834	570	497	2.49093	2.45001e-05	353	2792	-0.0425543	0.955739	2020	2224	orf19.6652 (DBP8)	DBP8	ATPase, putative RNA helicase of the DEAD-box family; component of 90S preribosome complex involved in production of 18S rRNA and assembly of 40S small ribosomal subunit; ATPase activity stimulated by association with Esf2p
CPAR2_300120		-0.145427	0.993547	53491	46522	-2.48607	8.23809e-08	988	191	1.4184	0.0108683	578	2012	1.5536	0.145524	502	1747	orf19.7114 (CSA1)
CPAR2_103040		-0.0447831	0.998689	9366	8937	-0.0162811	0.972375	61400	67246	-2.48401	3.75585e-14	79978	18952	-0.67013	0.316629	38481	28744	orf19.2511.2
CPAR2_500580		1.11428	0.190305	756	1583	2.47888	3.17282e-28	1290	8137	0.559234	0.232514	925	1818	-0.264045	0.634496	1282	1249	No C.albicans ortholog
CPAR2_200430		0.336613	0.93737	2641	3262	0.0850083	0.931776	2148	2575	2.47854	1.20028e-05	1709	13026	-0.15852	0.707143	17498	18270	orf19.7618	PNO1	Essential nucleolar protein required for pre-18S rRNA processing, interacts with Dim1p, an 18S rRNA dimethyltransferase, and also with Nob1p, which is involved in proteasome biogenesis; contains a KH domain
CPAR2_203760		-0.205509	0.557689	23511	19839	-0.738033	0.00796318	52948	36121	-2.4762	5.42659e-09	68493	16383	-0.0879999	0.81089	24418	26674	orf19.4862.2 (PET100)	PET100	Chaperone that specifically facilitates the assembly of cytochrome c oxidase, integral to the mitochondrial inner membrane; interacts with a subcomplex of subunits VII, VIIa, and VIII (Cox7p, Cox9p, and Cox8p) but not with the holoenzyme
CPAR2_302450		0.828288	0.651424	29	50	2.46672	0.000351518	28	174	0.753885	0.398508	59	133	-0.0224161	0.993314	34	39	No C.albicans ortholog
CPAR2_109430		-0.475787	0.0464457	64311	45063	-0.951793	2.63245e-12	103947	60481	-2.46661	3.68734e-07	117640	28515	-0.202492	0.764268	59851	60589	orf19.3357	FYV4	Protein of unknown function, required for survival upon exposure to K1 killer toxin
CPAR2_110040		0.286096	0.958015	3988	4752	-0.209395	0.826024	2781	2716	2.46462	2.21358e-07	2173	16468	-0.279827	0.479266	16000	15446	orf19.6014 (RRS1)	RRS1	Essential protein that binds ribosomal protein L11; required for nuclear export of the 60S pre-ribosomal subunit during ribosome biogenesis; localizes to the nucleolus and in foci along nuclear periphery; cooperates with Ebp2p and Mps3p to mediate telomere clustering by binding Sir4p, but is not involved in telomere tethering; mouse homolog shows altered expression in Huntington's disease model m…
CPAR2_203550		0.685871	0.779198	113	178	1.05501	0.287718	252	591	2.46338	7.6311e-06	143	1040	0.336338	0.761637	184	266	orf19.5282
CPAR2_403030		-0.00235836	0.99901	6186	6005	0.254435	0.259249	6216	8382	2.46329	2.15317e-06	4829	34308	0.57113	0.207505	3768	6629	orf19.3770 (ARG8)	ARG8	Acetylornithine aminotransferase, catalyzes the fourth step in the biosynthesis of the arginine precursor ornithine
CPAR2_301490		0.147552	0.992929	1870	2027	-0.210268	0.831607	1102	1066	2.46162	9.77688e-06	807	6171	-0.338858	0.621562	6101	5549	orf19.7069	TAE1	AdoMet-dependent proline methyltransferase; catalyzes the dimethylation of ribosomal proteins Rpl12 and Rps25 at N-terminal proline residues; has a role in protein synthesis; fusion protein localizes to the cytoplasm
CPAR2_105980		-0.567545	0.657112	52397	34597	-1.67675	9.77349e-07	32202	11258	-2.46028	0.000338542	27494	6597	-0.395668	0.624418	43395	39018	orf19.2992 (RPP1A)	RPP1A	Ribosomal stalk protein P1 alpha, involved in the interaction between translational elongation factors and the ribosome; accumulation of P1 in the cytoplasm is regulated by phosphorylation and interaction with the P2 stalk component
CPAR2_201790		-0.206146	0.901785	4621	3909	0.688265	0.0216962	3907	6995	2.4582	1.89886e-08	2775	19658	0.482838	0.314731	3853	6214	orf19.1832 (FCY23)	TPN1	Plasma membrane pyridoxine (vitamin B6) transporter; member of the purine-cytosine permease subfamily within the major facilitator superfamily; proton symporter with similarity to Fcy21p, Fcy2p, and Fcy22p
CPAR2_500920		0.503609	0.0639238	533	735	2.45812	5.55704e-36	760	4661	0.534647	0.310463	532	1064	-0.257517	0.652759	3199	3074	orf19.3839 (SAP10)
CPAR2_102480		2.45267	2.7699e-20	522	2794	0.692905	0.0494557	586	1046	0.895181	0.0763682	644	1703	-0.168643	0.804604	1175	1235	orf19.278
CPAR2_807650		0.219729	0.992929	2959	3381	0.339942	0.642285	2361	3352	2.45133	3.55139e-13	1763	13190	-0.172618	0.725111	7541	7824	orf19.1646	MRD1	Essential conserved protein that is part of the 90S preribosome; required for production of 18S rRNA and small ribosomal subunit; contains five consensus RNA-binding domains
CPAR2_102630	MET13	1.62508	7.22511e-10	5425	16343	2.44773	3.28871e-19	2860	17479	-0.87663	0.0218529	2004	1498	0.924049	0.33723	2032	4297	orf19.288 (MET13)	MET13	Major isozyme of methylenetetrahydrofolate reductase, catalyzes the reduction of 5,10-methylenetetrahydrofolate to 5-methyltetrahydrofolate in the methionine biosynthesis pathway
CPAR2_204250		-0.233903	0.893448	1143	944	-0.138963	0.777945	936	955	2.44408	2.91464e-10	846	6171	0.159752	0.77032	4947	6509	orf19.544	RPR2	Subunit of nuclear RNase P; nuclear RNase P cleaves tRNA precursors to generate mature 5' ends and facilitates turnover of nuclear RNAs; not shared between RNase MRP and RNase P, in contrast to all other RNase P protein subunits
CPAR2_600300		-0.509015	0.267224	4418	3027	0.197074	0.712327	5169	6621	2.443	3.11187e-06	3454	23957	0.614034	0.213398	2303	4102	orf19.5548 (LYS14)
CPAR2_301210		-0.234966	0.82037	4159	3446	0.369809	0.106082	5781	8426	2.43269	1.8777e-05	4282	29914	1.00582	0.073064	1691	4063	orf19.6500 (ECM42)	ARG7	Mitochondrial ornithine acetyltransferase, catalyzes the fifth step in arginine biosynthesis; also possesses acetylglutamate synthase activity, regenerates acetylglutamate while forming ornithine
CPAR2_501220		-0.517335	0.37524	574	390	-0.365399	0.476688	627	544	2.43215	2.30313e-05	500	3414	0.549413	0.366424	1354	2260	orf19.7320 (LIP7)
CPAR2_214150		0.715676	0.420594	628	997	-0.192969	0.927959	2820	2743	2.42858	5.74516e-08	984	7240	0.380757	0.517087	507	762	orf19.1461
CPAR2_702440		-0.455291	0.797945	70411	50197	-1.51644	1.63211e-11	81516	31872	-2.42395	0.0016573	74706	18538	-0.480926	0.45234	56955	48245	orf19.7188 (RPP1B)	RPP1B	Ribosomal protein P1 beta, component of the ribosomal stalk, which is involved in interaction of translational elongation factors with ribosome; accumulation is regulated by phosphorylation and interaction with the P2 stalk component
CPAR2_103270		-0.711718	0.0179993	5092	3024	-0.483189	0.234844	5885	4686	-2.4226	6.12345e-07	4838	1255	0.37843	0.693037	1712	2620	orf19.326
CPAR2_101160		0.325592	0.575399	54615	66534	-1.20984	1.37779e-06	118921	58523	-2.42048	6.60168e-05	131208	32890	-0.000872337	0.997963	9480	11071	No C.albicans ortholog
CPAR2_301340		0.718462	0.660634	2492	4010	-0.686088	0.00727328	3138	2170	2.41944	7.08473e-06	1627	12420	0.550466	0.624553	2653	4481	orf19.6514 (CUP9)	TOS8	Homeodomain-containing protein and putative transcription factor found associated with chromatin; target of SBF transcription factor; induced during meiosis and under cell-damaging conditions; similar to Cup9p transcription factor
CPAR2_803410		-0.368193	0.64857	105913	79753	-2.35829	5.74963e-10	105058	23462	-2.40645	0.0247003	120728	30674	-0.496002	0.470007	383255	319703	orf19.6265 (RPS22A)	RPS22A	Protein component of the small (40S) ribosomal subunit; nearly identical to Rps22Bp and has similarity to E. coli S8 and rat S15a ribosomal proteins
CPAR2_700900		0.805095	1.43832e-05	3725	6348	2.40603	1.93266e-51	5635	33440	-0.332273	0.482379	5537	5913	0.0178535	0.968228	1273	1510	orf19.4778 (LYS142)
CPAR2_402200		-0.475333	0.60957	23144	16254	-1.52114	8.52582e-15	22651	8760	-2.40312	7.611e-08	14385	3718	-0.593869	6.60952e-05	6190	4771	orf19.5650 (PRO3)	PRO3	Delta 1-pyrroline-5-carboxylate reductase, catalyzes the last step in proline biosynthesis
CPAR2_406740		-0.611343	0.21404	4338	2775	0.273733	0.440838	3320	4488	2.39908	4.97394e-15	2602	18102	-0.0342292	0.940331	6076	6904	orf19.2251 (AAH1)	AAH1	Adenine deaminase (adenine aminohydrolase), converts adenine to hypoxanthine; involved in purine salvage; transcriptionally regulated by nutrient levels and growth phase; Aah1p degraded upon entry into quiescence via SCF and the proteasome
CPAR2_302710		-0.568638	0.0292186	12118	7968	-0.939762	7.50017e-08	16082	9369	-2.3981	0.000125177	16086	4082	-0.539116	0.457179	25188	20581	orf19.5684	MRPL38	Mitochondrial ribosomal protein of the large subunit; appears as two protein spots (YmL34 and YmL38) on two-dimensional SDS gels
CPAR2_703800		-0.32816	0.588068	415	322	-0.0264491	0.971607	311	343	2.39359	3.40365e-18	264	1886	0.558724	0.516728	228	389	No C.albicans ortholog
CPAR2_108230		0.83557	0.746058	3314	5819	1.48771	3.55478e-07	50716	159652	2.38466	3.62137e-05	71391	488288	0.890332	0.103663	529	1155	No C.albicans ortholog
CPAR2_807280		-0.478688	0.689742	223588	156814	-1.73455	4.10301e-23	195633	65408	-2.38174	0.000445329	178987	45915	0.12415	0.825119	183216	227720	orf19.6002 (RPL8B)	RPL8B	Ribosomal protein L4 of the large (60S) ribosomal subunit, nearly identical to Rpl8Ap and has similarity to rat L7a ribosomal protein; mutation results in decreased amounts of free 60S subunits
CPAR2_807570		-0.417082	0.74	41754	30540	-1.63984	3.89323e-07	29179	10447	-2.37819	0.00145954	24450	6170	-0.563267	0.510834	42964	34679	orf19.5928 (RPP2B)	RPP2B	Ribosomal protein P2 beta, a component of the ribosomal stalk, which is involved in the interaction between translational elongation factors and the ribosome; regulates the accumulation of P1 (Rpp1Ap and Rpp1Bp) in the cytoplasm
CPAR2_801790		1.96733	0.00277905	303	1162	2.37279	0.000218439	98	564	1.70545	0.0565635	143	690	0.0749135	0.899748	894	1107	orf19.4936.1
CPAR2_202630		-0.270654	0.967437	28087	22553	-0.662138	0.00190601	19460	13701	-2.36742	2.9801e-09	16184	4057	-0.295275	0.642236	22149	21024	orf19.4952.1	FPR2	Membrane-bound peptidyl-prolyl cis-trans isomerase (PPIase), binds to the drugs FK506 and rapamycin; expression pattern suggests possible involvement in ER protein trafficking
CPAR2_504210		-0.175597	0.992929	117	101	0.305486	0.543558	212	293	2.36529	8.31649e-05	162	1053	0.274942	0.760239	187	260	No C.albicans ortholog
CPAR2_210320		-0.330951	0.686709	38877	30005	-0.606242	0.00113716	65887	48952	-2.36434	6.54594e-06	79078	20567	-0.091274	0.863412	37335	40684	orf19.1485	MRPL31	Mitochondrial ribosomal protein of the large subunit
CPAR2_602260		-0.0167511	0.999	111421	107742	-1.20779	5.71644e-17	163108	78844	-2.35833	2.53661e-06	139324	36763	0.0363373	0.952975	4867	5683	orf19.3419 (MAE1)	MAE1	Mitochondrial malic enzyme, catalyzes the oxidative decarboxylation of malate to pyruvate, which is a key intermediate in sugar metabolism and a precursor for synthesis of several amino acids
CPAR2_804280		0.844874	7.74112e-07	1418	2481	2.35552	1.58626e-47	1313	7490	0.596232	0.321911	952	1982	0.155218	0.801391	597	766	orf19.6976	YJL163C	Putative protein of unknown function
CPAR2_300430		-0.433758	0.857607	127501	92348	-1.46713	5.47146e-09	79057	32116	-2.35131	0.000114425	66979	17418	-0.0957839	0.836185	83106	90243	orf19.6906 (ASC1)	ASC1	G-protein beta subunit and guanine nucleotide dissociation inhibitor for Gpa2p; ortholog of RACK1 that inhibits translation; core component of the small (40S) ribosomal subunit; represses Gcn4p in the absence of amino acid starvation
CPAR2_100490		0.409746	0.00250722	8454	10939	2.34713	1.65654e-40	5947	33690	0.266986	0.677959	5394	9123	0.278088	0.624553	2468	3526	orf19.1979 (GIT3)
CPAR2_201600		0.158534	0.992929	1743	1909	-0.194627	0.830275	1512	1486	2.34582	1.58819e-06	992	6951	-0.172496	0.731025	5123	5340	orf19.5010 (DIM1)	DIM1	Essential 18S rRNA dimethylase (dimethyladenosine transferase), responsible for conserved m6(2)Am6(2)A dimethylation in 3'-terminal loop of 18S rRNA, part of 90S and 40S pre-particles in nucleolus, involved in pre-ribosomal RNA processing
CPAR2_209730		-0.538206	0.445585	354932	238503	-1.47532	2.82528e-09	353232	140321	-2.34069	0.000501463	309675	80764	-0.40978	0.54212	489265	435974	orf19.6873 (RPS8A)	RPS8B	Protein component of the small (40S) ribosomal subunit; identical to Rps8Ap and has similarity to rat S8 ribosomal protein
CPAR2_404800		-0.230209	0.988023	66372	54933	-0.255491	0.384693	62238	58801	-2.33859	7.58902e-08	74131	20621	-0.281644	0.766425	89090	83103	orf19.7400 (ALS7)
CPAR2_800040		0.441702	0.133802	1195	1583	0.163889	0.679782	1459	1833	2.33769	1.53199e-11	1130	7498	0.185077	0.714398	1397	1864	orf19.7518 (ZCF38)
CPAR2_205890		-0.0190553	0.999	3441	3339	-0.0345836	0.987819	2230	2460	2.33478	0.00168521	1382	9707	-0.423213	0.46979	8921	7871	orf19.6417 (TSR1)	TSR1	Protein required for processing of 20S pre-rRNA in the cytoplasm; associates with pre-40S ribosomal particles; inhibits the premature association of 60S subunits with assembling 40S subunits in the cytoplasm; similar to Bms1p
CPAR2_207910		-0.478146	0.115509	234648	164174	-1.79088	9.71273e-24	327596	106309	-2.3329	0.00672284	325996	86809	-0.506847	0.263487	648998	539914	orf19.667.1 (RPL37B)	RPL37B	Protein component of the large (60S) ribosomal subunit, has similarity to Rpl37Ap and to rat L37 ribosomal protein
CPAR2_703780		-0.205723	0.921762	838	709	0.119655	0.816834	1557	1897	2.33099	5.42979e-06	1187	7593	0.533083	0.495746	583	1002	No C.albicans ortholog
CPAR2_212850	HGT8	2.33042	1.3766e-17	204	998	0.991061	0.134513	195	434	1.05671	0.11163	236	672	-0.324056	0.604014	1876	1775	orf19.2021 (HGT8)
CPAR2_801100	ROX1	1.03367	1.33261e-06	15337	30522	1.50836	1.32765e-06	4587	14716	2.33022	0.00357951	3708	27672	0.81924	0.682159	4172	8124	orf19.2823 (RFG1)	ROX1	Heme-dependent repressor of hypoxic genes; contains an HMG domain that is responsible for DNA bending activity
CPAR2_209800		0.36215	0.807863	1620	2029	2.32951	3.31236e-10	1003	5690	1.97778	0.00210394	1134	6096	-0.34664	0.398945	11266	10483	orf19.4120 (LAS1)	LAS1	Protein required for pre-rRNA processing at both ends of ITS2; may coordinate the action of the Rat1p-Rai1p exoRNAse; required for the G1/S transition of the cell cycle; human ortholog is Las1L; mutants require the SSD1-v allele for viability
CPAR2_302640		2.32077	0.00561866	1569	7592	-0.0646449	0.866066	1092	1168	0.48472	0.200001	1048	1958	-0.00620973	0.992689	1008	1158	No C.albicans ortholog
CPAR2_806770		-0.750533	0.139416	10987	6378	-1.18125	2.36265e-07	13241	6508	-2.31914	4.31097e-05	11841	3206	0.0633628	0.855692	6604	8038	orf19.7386	MBA1	Membrane-associated mitochondrial ribosome receptor; forms a complex with Mdm38p that may facilitate recruitment of mRNA-specific translational activators to ribosomes; possible role in protein export from the matrix to inner membrane
CPAR2_206510		0.246557	0.99233	2584	3003	-0.127893	0.899553	1938	1996	2.31878	1.31807e-05	1376	9358	-0.229979	0.604649	10472	10466	orf19.3553 (RPF2)	RPF2	Essential protein involved in the processing of pre-rRNA and the assembly of the 60S ribosomal subunit; interacts with ribosomal protein L11; localizes predominantly to the nucleolus; constituent of 66S pre-ribosomal particles
CPAR2_503990		0.598871	0.992929	24437	36744	-2.31557	3.20524e-23	169716	37612	-1.74313	0.0372322	113587	45210	-0.317041	0.578571	37148	35016	orf19.5437 (RHR2)	RHR2	Constitutively expressed isoform of DL-glycerol-3-phosphatase; involved in glycerol biosynthesis, induced in response to both anaerobic and, along with the Hor2p/Gpp2p isoform, osmotic stress
CPAR2_109910		0.460716	0.686709	2779	3712	2.31498	8.77861e-32	2080	11651	1.52066	1.47736e-05	1788	6923	0.57397	0.189958	811	1409	orf19.6020	ATG3	E2-like enzyme involved in autophagy and the cytoplasm-to-vacuole targeting (Cvt) pathway; plays a role in formation of Atg8p-phosphatidylethanolamine conjugates, which are involved in membrane dynamics during autophagy and Cvt
CPAR2_503870		1.57405	1.81372e-26	6987	20288	2.30714	1.32863e-32	6035	33268	-0.584446	0.100591	5857	5365	0.287064	0.578359	2593	3627	orf19.5393
CPAR2_105270		0.43826	0.854031	4102	5367	-0.421219	0.799126	4390	3672	2.30554	1.2188e-08	1671	10870	0.0622872	0.924848	2080	2574	orf19.6844 (ICL1)	ICL1	Isocitrate lyase, catalyzes the formation of succinate and glyoxylate from isocitrate, a key reaction of the glyoxylate cycle; expression of ICL1 is induced by growth on ethanol and repressed by growth on glucose
CPAR2_103030		-0.252231	0.916376	15199	12459	-0.689476	7.6884e-07	40827	28366	-2.30506	6.9687e-07	46281	12427	-0.395794	0.558966	27834	24860	orf19.2511.1 (MRPL33)	MRPL33	Mitochondrial ribosomal protein of the large subunit
CPAR2_402820		0.0072424	0.998689	20966	20513	-0.86522	3.99671e-06	29806	18124	-2.30189	1.05753e-15	25490	6887	0.00664105	0.992281	8631	10100	orf19.5665	ARA2	NAD-dependent arabinose dehydrogenase, involved in biosynthesis of dehydro-D-arabinono-1,4-lactone; similar to plant L-galactose dehydrogenase
CPAR2_703340		0.282891	0.992929	1891	2256	-0.263078	0.810558	1256	1177	2.30126	0.000637684	849	5762	-0.357864	0.556083	3491	3215	orf19.5507 (ENP1)	ENP1	Protein associated with U3 and U14 snoRNAs, required for pre-rRNA processing and 40S ribosomal subunit synthesis; localized in the nucleus and concentrated in the nucleolus
CPAR2_600210		0.0864632	0.993547	280237	287833	-0.596147	0.000488682	204298	150970	-2.29204	2.33402e-10	229331	61311	-0.296988	0.694547	121292	115608	orf19.5597.1
CPAR2_401730		-0.762952	0.296219	16588	9559	-0.951736	0.000180957	31446	18099	-2.29072	9.23896e-09	29475	7805	0.176682	0.642236	8464	11170	orf19.1416 (COX11)	COX11	Mitochondrial inner membrane protein required for delivery of copper to the Cox1p subunit of cytochrome c oxidase; association with mitochondrial ribosomes suggests that copper delivery may occur during translation of Cox1p
CPAR2_501380		-1.47973	0.0717147	53308	18572	-2.2903	1.07854e-19	86545	20040	-2.25469	0.00393928	38089	10592	-0.392487	0.620615	3929	3584	orf19.4716 (GDH3)	GDH3	NADP(+)-dependent glutamate dehydrogenase, synthesizes glutamate from ammonia and alpha-ketoglutarate; rate of alpha-ketoglutarate utilization differs from Gdh1p; expression regulated by nitrogen and carbon sources
CPAR2_107500		-0.83651	0.00406977	50610	27613	-2.28311	3.37972e-19	68232	15609	-1.26216	3.19411e-06	61149	34203	-1.0037	0.000789309	51832	30595	orf19.2475 (PGA26)
CPAR2_702640		-0.137938	0.979346	6038	5328	0.0194602	0.979185	6814	7684	2.28258	2.21771e-12	3060	20494	1.53877	0.00525406	527	1795	orf19.6586
CPAR2_700590		-0.514437	0.262346	24718	16850	-0.69578	9.70703e-05	41230	28445	-2.27613	4.04085e-06	44809	11868	-0.654284	0.469461	16426	12456	orf19.7222 (PAM16)	PAM16	Constituent of the import motor (PAM complex) component of the Translocase of the Inner Mitochondrial membrane (TIM23 complex); forms a 1:1 subcomplex with Pam18p and inhibits its cochaperone activity; contains a J-like domain
CPAR2_213690		0.376265	0.472365	587	741	-0.89705	0.231588	541	324	2.27595	0.000235755	256	1805	0.420211	0.714398	759	1131	orf19.1914 (FAV3)
CPAR2_501680		-0.286913	0.760358	175496	139983	-1.86006	4.16458e-11	130977	41064	-2.27423	0.0130017	146927	40864	-0.33556	0.505611	324534	299886	orf19.4149.1	RPS11A	Protein component of the small (40S) ribosomal subunit; identical to Rps11Bp and has similarity to E. coli S17 and rat S11 ribosomal proteins
CPAR2_200730		-0.554633	0.332181	23658	15717	-1.01011	1.14834e-05	25555	14258	-2.27164	4.41899e-06	24236	6744	-0.29324	0.588141	31391	30427	orf19.7577 (MSS51)	MSS51	Specific translational activator for the mitochondrial COX1 mRNA; loosely associated with the matrix face of the mitochondrial inner membrane; influences both COX1 mRNA translation and Cox1p assembly into cytochrome c oxidase
CPAR2_207210		0.109993	0.993547	232596	246167	-0.93035	0.00334109	306826	180089	-2.27046	2.68177e-07	268535	73034	-0.161224	0.799683	55068	57837	orf19.395 (ENO1)	ENO1	Enolase I, a phosphopyruvate hydratase that catalyzes the conversion of 2-phosphoglycerate to phosphoenolpyruvate during glycolysis and the reverse reaction during gluconeogenesis; expression is repressed in response to glucose
CPAR2_304320		-0.598379	0.0028998	19011	12217	-1.20615	3.22129e-13	27427	13241	-2.26705	1.96967e-08	24933	6863	-0.142759	0.81089	13551	14123	orf19.6662	COQ10	Coenzyme Q (ubiquinone) binding protein, functions in the delivery of Q<sub>6</sub> to its proper location for electron transport during respiration; START domain protein with homologs in bacteria and eukaryotes
CPAR2_802490		0.145538	0.992929	2108	2283	-0.204939	0.802933	986	968	2.26577	0.00161817	607	4132	-0.10928	0.850413	3950	4235	orf19.3287 (BUD22)	BUD22	Protein required for 18S rRNA maturation and small ribosomal subunit biogenesis; cosediments with pre-ribosomal particles; mutation decreases efficiency of +1 Ty1 frameshifting and transposition, and affects budding pattern
CPAR2_504080		0.466413	0.985725	4439	5917	2.26441	4.09288e-08	1049	5732	0.548075	0.244522	1147	2276	0.398752	0.48138	2147	3260	orf19.5447 (HGT19)
CPAR2_302980		0.480584	0.659679	811	1106	0.790498	0.0118934	813	1566	2.264	3.28037e-06	699	4353	0.059151	0.904385	1281	1553	orf19.1105
CPAR2_100440		-0.666682	0.45955	12967	7915	-1.11063	3.6097e-07	24562	12625	-2.26329	2.90561e-07	23407	6490	-0.243604	0.725372	16102	16045	orf19.588	MIC14	Mitochondrial intermembrane space protein, required for normal oxygen consumption; contains twin cysteine-x9-cysteine motifs
CPAR2_109750		0.588635	1.64277e-09	16522	24177	2.26325	4.97052e-83	11526	62054	-1.09768	0.00430476	11476	7337	0.221017	0.604324	6876	9351	orf19.3312	AIM9	Putative protein of unknown function; the authentic, non-tagged protein is detected in highly purified mitochondria in high-throughput studies; null mutant displays elevated frequency of mitochondrial genome loss
CPAR2_602350		0.413489	0.769018	4818	6258	0.0505123	0.949462	2374	2785	2.26186	0.0121186	2506	16704	0.0622335	0.936682	8541	10166	orf19.3393	DBP9	DEAD-box protein required for 27S rRNA processing; exhibits DNA, RNA and DNA/RNA helicase activities; ATPase activity shows preference for DNA over RNA; DNA helicase activity abolished by mutation in RNA-binding domain
CPAR2_100565		0.425507	0.99233	106	140	0.47843	0.75597	32	49	2.26041	0.00287598	20	128	0.4915	0.825119	38	59	orf19.4305
CPAR2_800070		0.340121	0.988692	48	59	2.25265	1.44261e-05	49	260	0.4375	0.700103	62	117	-0.412298	0.702717	195	174	orf19.5144 (PGA28)
CPAR2_603240		0.199147	0.992929	3575	4028	-0.505405	0.522436	2253	1790	2.24839	0.000352102	1466	9616	-0.0500587	0.935993	4728	5311	orf19.124 (CIC1)	CIC1	Essential protein that interacts with proteasome components and has a potential role in proteasome substrate specificity; also copurifies with 66S pre-ribosomal particles
CPAR2_201920		0.660808	0.448477	4905	7582	0.714726	0.19321	2747	5029	2.24275	2.45841e-05	1797	11771	0.130755	0.739193	6368	8059	orf19.4900	MNT2	Mannosyltransferase involved in adding the 4th and 5th mannose residues of O-linked glycans
CPAR2_301670		0.127049	0.993547	2063	2210	-0.257439	0.822635	1425	1348	2.24244	0.000749221	837	5419	-0.423733	0.53243	9833	8753	orf19.4815 (YTM1)	YTM1	Constituent of 66S pre-ribosomal particles, forms a complex with Nop7p and Erb1p that is required for maturation of the large ribosomal subunit; has seven C-terminal WD repeats
CPAR2_212340		-0.157036	0.992929	3366	2919	-0.618409	0.0530686	3586	2647	-2.24217	0.000408017	4909	1418	0.0538879	0.927818	3200	3838	orf19.5841
CPAR2_104840		-0.995806	0.354635	35724	17337	-2.24155	1.46538e-48	77253	18307	-0.886747	0.0607546	81970	57479	-0.119161	0.844964	38615	41295	orf19.4101
CPAR2_502330		-0.329613	0.938863	132848	102428	-0.51038	0.00759893	146462	116178	-2.24039	1.48354e-11	173496	48416	-0.341583	0.647536	118679	109079	orf19.5689	SEC28	Epsilon-COP subunit of the coatomer; regulates retrograde Golgi-to-ER protein traffic; stabilizes Cop1p, the alpha-COP and the coatomer complex; non-essential for cell growth
CPAR2_109270		0.813808	0.448477	2110	3632	-0.0913283	0.93344	1476	1549	2.23186	0.0275285	762	5354	0.443259	0.64349	4067	6229	orf19.3338
CPAR2_601860		0.50761	0.86795	34	47	1.63567	0.255213	13	44	2.2305	0.0238454	9	57	-0.576538	0.925272	5	4	orf19.5519 (GCV1)	GCV1	T subunit of the mitochondrial glycine decarboxylase complex, required for the catabolism of glycine to 5,10-methylene-THF; expression is regulated by levels of levels of 5,10-methylene-THF in the cytoplasm
CPAR2_500370		0.0744353	0.993547	2340	2419	-0.0418358	0.973143	1260	1377	2.23005	0.000897382	892	5802	-0.041119	0.928276	5892	6689	orf19.6862	RIX1	Essential component of the Rix1 complex (Rix1p, Ipi1p, Ipi3p) that is required for processing of ITS2 sequences from 35S pre-rRNA; Rix1 complex associates with Mdn1p in pre-60S ribosomal particles
CPAR2_105650		-0.404085	0.633518	17631	12947	-0.96084	0.000722645	14867	8665	-2.22934	0.00660719	19117	5754	-0.197107	0.639583	22125	22163	orf19.755 (MRPL37)	MRPL37	Mitochondrial ribosomal protein of the large subunit
CPAR2_805860		-0.0858745	0.993547	4464	4117	-0.169235	0.722558	9457	9395	-2.228	4.00146e-07	9887	2720	0.0575471	0.90535	1278	1562	orf19.1617	YDR282C	Putative protein of unknown function
CPAR2_205620		-0.371262	0.921616	115618	87498	-1.49264	9.4174e-09	91985	36497	-2.22765	0.00193403	76295	21445	-0.10962	0.783341	103586	111601	orf19.6375 (RPS20)	RPS20	Protein component of the small (40S) ribosomal subunit; overproduction suppresses mutations affecting RNA polymerase III-dependent transcription; has similarity to E. coli S10 and rat S20 ribosomal proteins
CPAR2_404990		0.197161	0.992929	3252	3655	-0.289802	0.695889	2175	2004	2.22369	5.47442e-05	1483	9530	-0.0980267	0.833515	9994	10900	orf19.1633 (UTP4)	UTP4	Subunit of U3-containing 90S preribosome and Small Subunit (SSU) processome complexes involved in production of 18S rRNA and assembly of small ribosomal subunit; member of t-Utp subcomplex involved with transcription of 35S rRNA transcript
CPAR2_213570		-0.304847	0.517356	103014	81103	-2.21892	3.53519e-11	68449	16881	-2.13329	NA	82811	25910	-0.435262	0.515941	352025	305877	orf19.2111.2 (RPL38)	RPL38	Protein component of the large (60S) ribosomal subunit, has similarity to rat L38 ribosomal protein
CPAR2_500810		-0.697339	0.46839	20041	12105	0.50113	0.0965657	25151	39899	2.21596	6.99609e-05	19613	114978	0.882479	0.00430427	5184	11221	orf19.1789.1 (LYS1)	LYS1	Saccharopine dehydrogenase (NAD+, L-lysine-forming), catalyzes the conversion of saccharopine to L-lysine, which is the final step in the lysine biosynthesis pathway; also has mRNA binding activity
CPAR2_204260		0.0852187	0.992929	30594	31703	-0.808028	0.00298253	40848	26068	-2.21569	8.81622e-07	35793	10206	0.0253713	0.957886	4124	4958	orf19.734 (GLK1)	GLK1	Glucokinase, catalyzes the phosphorylation of glucose at C6 in the first irreversible step of glucose metabolism; one of three glucose phosphorylating enzymes; expression regulated by non-fermentable carbon sources
CPAR2_101390		-0.24909	0.800795	141169	115412	-1.05108	2.31166e-06	144403	78497	-2.21085	0.000285923	139807	40288	-0.557982	0.468684	159933	128193	orf19.4311 (YNK1)	YNK1	Nucleoside diphosphate kinase, catalyzes the transfer of gamma phosphates from nucleoside triphosphates, usually ATP, to nucleoside diphosphates by a mechanism that involves formation of an autophosphorylated enzyme intermediate
CPAR2_206030		-0.178191	0.888277	5652	4864	-1.21963	1.59926e-07	15964	7727	-2.20836	2.47434e-09	18731	5322	0.137231	0.820397	3119	3968	orf19.537
CPAR2_804820		0.165094	0.992929	27707	30064	-0.695319	0.0803422	28851	20379	-2.2078	0.000396122	36283	10561	-0.720003	0.175086	106284	76101	orf19.4845	TVP18	Integral membrane protein localized to late Golgi vesicles along with the v-SNARE Tlg2p; may interact with ribosomes, based on co-purification experiments
CPAR2_701170		0.171187	0.992929	3078	3395	-0.404233	0.566616	2045	1742	2.20291	0.00179907	1467	9316	-0.366339	0.434844	6427	5871	orf19.6589	SSF1	Constituent of 66S pre-ribosomal particles, required for ribosomal large subunit maturation; functionally redundant with Ssf2p; member of the Brix family
CPAR2_808930		-0.386587	0.731031	134663	100520	-1.68915	1.966e-09	184622	63932	-2.20018	0.00480193	175492	50537	-0.696248	0.409913	491817	362201	orf19.6785 (RPS12)	RPS12	Protein component of the small (40S) ribosomal subunit; has similarity to rat ribosomal protein S12
CPAR2_802740		0.912383	0.000975094	4489	8202	-0.0196639	0.985676	3881	4375	2.20012	0.0262335	4830	31163	-0.726586	0.171738	66534	47690	orf19.2564	TMA23	Nucleolar protein implicated in ribosome biogenesis; deletion extends chronological lifespan
CPAR2_108430		-0.0344856	0.993547	12932	12262	-0.151648	0.656904	12940	13002	-2.19549	2.63659e-14	12042	3480	-0.176855	0.634496	7929	8211	orf19.2966	YDL086W	Putative protein of unknown function; the authentic, non-tagged protein is detected in highly purified mitochondria in high-throughput studies; YDL086W is not an essential gene
CPAR2_703250		1.05344	0.0409699	2136	4327	0.767656	0.00567191	2178	4163	2.19461	1.58664e-05	2079	13318	1.26755	8.9691e-06	827	2343	No C.albicans ortholog
CPAR2_701670		-0.56753	0.186194	23914	15736	0.462513	0.192785	25826	40065	2.19297	5.72976e-06	19738	115520	1.11904	0.037599	4844	12257	orf19.597
CPAR2_805920		-1.51651	1.5935e-11	78611	26712	-2.1917	5.53584e-18	379782	93260	-1.64142	0.000996788	170950	70377	-0.695828	0.282768	31123	22589	No C.albicans ortholog
CPAR2_100520		0.030426	0.998689	366	366	-0.427655	0.591231	437	365	2.19027	0.000373315	308	1879	-0.34269	0.586715	1644	1534	orf19.1975	DIB1	17-kDa component of the U4/U6aU5 tri-snRNP, plays an essential role in pre-mRNA splicing, orthologue of hDIM1, the human U5-specific 15-kDa protein
CPAR2_701360		0.245994	0.99233	4589	5329	0.0755943	0.912948	2247	2680	2.18697	1.21558e-06	1527	9651	-0.0455119	0.951968	3006	3358	orf19.7552	UTP14	Subunit of U3-containing Small Subunit (SSU) processome complex involved in production of 18S rRNA and assembly of small ribosomal subunit
CPAR2_206780		-0.241753	0.64857	506237	416569	-1.43404	6.94215e-09	590720	246354	-2.18656	0.000518562	616150	181114	-0.47704	0.494911	746072	633293	orf19.6253 (RPS23A)	RPS23B	Ribosomal protein 28 (rp28) of the small (40S) ribosomal subunit, required for translational accuracy; nearly identical to Rps23Ap and similar to E. coli S12 and rat S23 ribosomal proteins; deletion of both RPS23A and RPS23B is lethal
CPAR2_101070		0.0940891	0.993547	42319	44278	-0.795154	1.73817e-06	89521	57619	-2.18468	6.81697e-08	77167	22402	-0.0972057	0.860259	4581	5003	orf19.3967 (PFK1)	PFK1	Alpha subunit of heterooctameric phosphofructokinase involved in glycolysis, indispensable for anaerobic growth, activated by fructose-2,6-bisphosphate and AMP, mutation inhibits glucose induction of cell cycle-related genes
CPAR2_703030		0.154432	0.992929	34908	38154	-0.515179	0.00700515	66479	51797	-2.18198	1.05567e-06	48827	14186	0.0480032	0.911974	2186	2616	orf19.6540 (PFK2)	PFK2	Beta subunit of heterooctameric phosphofructokinase involved in glycolysis, indispensable for anaerobic growth, activated by fructose-2,6-bisphosphate and AMP, mutation inhibits glucose induction of cell cycle-related genes
CPAR2_208930		-0.17851	0.876478	156487	134542	-1.62925	8.58114e-17	156308	57118	-2.18181	0.0118725	149571	44116	-0.559434	0.202399	494703	397160	orf19.6220.4	RPL34B	Protein component of the large (60S) ribosomal subunit, nearly identical to Rpl34Ap and has similarity to rat L34 ribosomal protein
CPAR2_802820		-0.409933	0.367109	3495	2566	-0.161027	0.652131	2365	2365	2.17889	1.31931e-07	1898	11125	0.349561	0.53243	2513	3704	orf19.2547
CPAR2_303070		-0.964156	0.015841	64710	32176	-1.91179	1.11628e-16	132914	40172	-2.177	5.56992e-05	147792	42139	-0.179674	0.748188	25856	26372	orf19.1114	RCF1	Cytochrome c oxidase subunit; required for assembly of the Complex III-Complex IV supercomplex, and for assembly of Cox13p and Rcf2p into cytochrome c oxidase; similar to Rcf2p, and either Rcf1p or Rcf2p is required for late-stage assembly of the Cox12p and Cox13p subunits and for cytochrome c oxidase activity; required for growth under hypoxic conditions; member of the hypoxia induced gene famil…
CPAR2_103260		0.260127	0.992929	1382	1629	2.17493	2.95031e-10	2200	11241	1.33725	0.00059751	1854	6456	0.0949984	0.866569	3324	4113	orf19.2809 (CTN3)	YAT2	Carnitine acetyltransferase; has similarity to Yat1p, which is a carnitine acetyltransferase associated with the mitochondrial outer membrane
CPAR2_402370		0.0139568	0.999	40	39	0.0997185	0.971607	54	70	2.17379	0.0471936	145	902	0.838607	0.253206	136	282	orf19.4179
CPAR2_109770		0.135931	0.992929	1548	1666	-1.1825	0.0212897	2146	1051	-2.1712	0.000908023	1333	416	0.518473	0.678087	151	247	orf19.3307	FMO1	Flavin-containing monooxygenase, localized to the cytoplasmic face of the ER membrane; catalyzes oxidation of biological thiols to maintain the ER redox buffer ratio for correct folding of disulfide-bonded proteins
CPAR2_406250		-0.186379	0.849873	655	560	0.547035	0.0478976	700	1148	2.1679	1.29853e-05	557	3231	-0.0927099	0.839001	2386	2631	orf19.1867
CPAR2_303760		-0.151216	0.992929	2809	2475	0.162572	0.793637	1964	2487	2.16573	9.02237e-13	901	5469	-0.0814092	0.882185	5229	5683	orf19.920 (RMT2)	RMT2	Arginine N5 methyltransferase; methylates ribosomal protein Rpl12 (L12) on Arg67
CPAR2_802590		-0.486778	0.585167	87855	61267	-1.42381	2.97714e-10	61379	25629	-2.16342	0.00101319	58391	17200	-0.221392	0.672746	70109	70035	orf19.2864.1 (RPL28)	RPL28	Ribosomal protein of the large (60S) ribosomal subunit, has similarity to E. coli L15 and rat L27a ribosomal proteins; may have peptidyl transferase activity; can mutate to cycloheximide resistance
CPAR2_405500		0.138672	0.992929	4084	4405	-0.0578777	0.952782	2379	2562	2.16159	0.000141459	1705	10743	0.0355649	0.955353	8404	10051	orf19.5959 (NOP14)	NOP14	Nucleolar protein, forms a complex with Noc4p that mediates maturation and nuclear export of 40S ribosomal subunits; also present in the small subunit processome complex, which is required for processing of pre-18S rRNA
CPAR2_102240		0.155255	0.992929	4663	5084	0.449668	0.501912	2894	4471	2.16141	1.37294e-06	2512	15219	-0.358039	0.457438	15311	14072	orf19.2504 (BMS1)	BMS1	GTPase required for synthesis of 40S ribosomal subunits and for processing the 35S pre-rRNA at sites A0, A1, and A2; interacts with Rcl1p, which stimulates its GTPase and U3 snoRNA binding activities; has similarity to Tsr1p
CPAR2_500690		-0.541202	0.944994	3285	2223	0.359647	0.222141	5651	8098	2.15935	6.05654e-09	3934	23091	0.329728	0.409369	3758	5445	orf19.3846 (LYS4)	LYS4	Homoaconitase, catalyzes the conversion of homocitrate to homoisocitrate, which is a step in the lysine biosynthesis pathway
CPAR2_207720		-0.148292	0.980219	280698	245831	-1.95531	4.41494e-07	239061	70861	-2.15914	NA	282598	86375	-0.26522	0.720527	702632	683483	orf19.1470 (RPS26A)	RPS26A	Protein component of the small (40S) ribosomal subunit; nearly identical to Rps26Bp and has similarity to rat S26 ribosomal protein
CPAR2_207520		0.274339	0.992929	7015	8203	0.648374	0.00468244	1553	2724	2.15677	2.15325e-07	1187	7165	0.107389	0.840178	2450	3096	orf19.4795
CPAR2_203940		2.15482	0.571018	1178	5071	1.08099	0.000844637	431	1023	1.68205	0.155486	1127	4941	0.305118	0.593265	1017	1469	No C.albicans ortholog
CPAR2_401490		0.614422	0.680352	2055	3043	0.995697	1.30988e-07	1790	4026	2.15474	7.98542e-06	2353	14451	0.845924	0.15709	1094	2284	No C.albicans ortholog
CPAR2_108450		-0.0928828	0.992929	92679	84067	-0.495229	0.0320895	71968	57842	-2.15223	0.00693584	83498	25846	-0.169158	0.780157	197291	199976	orf19.2965	GET3	Guanine nucleotide exchange factor for Gpa1p; amplifies G protein signaling; subunit of the GET complex, which is involved in Golgi to ER trafficking and insertion of proteins into the ER membrane; has low-level ATPase activity
CPAR2_209690		0.198018	0.925441	704	788	0.586316	0.206247	318	536	2.15104	2.83217e-11	272	1630	0.0253877	0.96451	1121	1329	No C.albicans ortholog
CPAR2_501980		-0.108126	0.992929	17256	15505	-0.49972	0.0246725	17372	13919	-2.1501	1.46506e-06	19670	5747	-0.409064	0.588141	27103	23987	orf19.4340.1	SMX3	Core Sm protein Sm F; part of heteroheptameric complex (with Smb1p, Smd1p, Smd2p, Smd3p, Sme1p, and Smx2p) that is part of the spliceosomal U1, U2, U4, and U5 snRNPs; homolog of human Sm F
CPAR2_202010		0.0821466	0.992929	66962	68657	-0.51849	0.0615917	74014	58854	-2.14587	7.62374e-05	99514	30610	-0.305278	0.581821	88733	83357	orf19.2622 (YPT31)	YPT32	Rab family GTPase, very similar to Ypt31p; involved in the exocytic pathway; mediates intra-Golgi traffic or the budding of post-Golgi vesicles from the trans-Golgi
CPAR2_107600		0.369588	0.983519	16686	20807	0.569351	0.344466	14577	23958	2.14459	0.000260887	10909	61047	-0.195417	0.780383	11412	11928	orf19.411
CPAR2_500590		-1.27089	0.517356	1496	602	-2.14412	3.81049e-07	6305	1571	-0.618574	0.284127	1127	984	-0.0790183	0.924848	460	515	orf19.1275 (GAT1)	GAT1	Transcriptional activator of genes involved in nitrogen catabolite repression; contains a GATA-1-type zinc finger DNA-binding motif; activity and localization regulated by nitrogen limitation and Ure2p
CPAR2_404270		-0.240801	0.220772	19026	15666	-0.525565	0.0371972	13799	10714	-2.14303	5.59181e-10	11731	3506	-0.183051	0.725111	11436	11853	orf19.7328
CPAR2_405290		-0.111271	0.992929	4605	4160	0.69125	0.00577661	2851	5144	2.14171	0.000696327	2116	11822	0.457225	0.124741	2080	3317	orf19.6000 (CDR1)	PDR5	Plasma membrane ATP-binding cassette (ABC) transporter, multidrug transporter actively regulated by Pdr1p; also involved in steroid transport, cation resistance, and cellular detoxification during exponential growth
CPAR2_301480		0.00062844	0.999931	1359	1326	0.129038	0.893772	818	1011	2.14098	0.000709543	642	3917	-1.41509	0.0079134	10025	4545	orf19.7071 (FGR2)
CPAR2_804760		0.284239	0.992929	3106	3738	-0.116998	0.796288	15134	15616	-2.14018	5.30937e-07	16511	4858	-0.397372	0.145524	6073	5409	orf19.4747 (HEM14)	HEM14	Protoporphyrinogen oxidase, a mitochondrial enzyme that catalyzes the seventh step in the heme biosynthetic pathway, converting protoporphyrinogen IX to protoporphyrin IX; inhibited by diphenyl ether-type herbicides
CPAR2_404240		1.33488	NA	44758	111476	-1.03728	0.00256669	1751805	963641	-2.13554	0.0733424	1644361	436530	0.0388056	0.973769	9942	11804	orf19.1354 (UCF1)	RGI1	Protein of unknown function involved in energy metabolism under respiratory conditions; protein abundance is increased upon intracellular iron depletion
CPAR2_304170		-0.455542	0.0543822	12219	8661	-1.27599	1.53053e-05	19579	9259	-2.13539	NA	30029	9490	-0.347617	0.620615	54509	50231	orf19.961.2	YDR115W	Putative mitochondrial ribosomal protein of the large subunit, has similarity to E. coli L34 ribosomal protein; required for respiratory growth, as are most mitochondrial ribosomal proteins
CPAR2_807880		0.0211341	0.996012	84486	83286	0.0090667	0.986466	62326	70398	-2.13318	5.82993e-09	62583	18975	-0.282953	0.56421	84057	81303	orf19.6190 (SRB1)	PSA1	GDP-mannose pyrophosphorylase (mannose-1-phosphate guanyltransferase), synthesizes GDP-mannose from GTP and mannose-1-phosphate in cell wall biosynthesis; required for normal cell wall structure
CPAR2_108370		0.369265	0.992929	25147	31445	-0.124666	0.967105	7832	8160	2.13182	0.0275425	5993	32627	-0.0540654	0.920951	35257	39653	orf19.4527 (HGT1)
CPAR2_700790		0.0659643	0.993547	2602	2667	-0.340671	0.711773	1729	1537	2.1302	0.000800014	1220	7425	-0.00462678	0.994854	3115	3615	orf19.5232 (CSI2)	BRX1	Nucleolar protein, constituent of 66S pre-ribosomal particles; depletion leads to defects in rRNA processing and a block in the assembly of large ribosomal subunits; possesses a sigma(70)-like RNA-binding motif
CPAR2_105520		-0.508573	0.855172	4273	2926	-2.12954	2.14617e-21	17481	4440	-0.340138	0.447993	2770	2927	0.082105	0.839002	1832	2250	orf19.780 (DUR1,2)	DUR1,2	Urea amidolyase, contains both urea carboxylase and allophanate hydrolase activities, degrades urea to CO2 and NH3; expression sensitive to nitrogen catabolite repression and induced by allophanate, an intermediate in allantoin degradation
CPAR2_101750		2.12899	4.36554e-07	140	595	-0.61461	0.167337	368	271	1.50427	0.00574111	394	1541	0.0964775	0.942198	95	120	No C.albicans ortholog
CPAR2_500520	ARO9	2.12781	2.34115e-09	3839	16322	0.606749	0.0284918	3331	5644	1.40401	0.00507169	2688	9401	0.200441	0.690472	915	1225	orf19.1237 (ARO9)	ARO9	Aromatic aminotransferase II, catalyzes the first step of tryptophan, phenylalanine, and tyrosine catabolism
CPAR2_406730		-0.329703	0.617457	29439	22838	-0.996701	0.000483319	22642	12665	-2.12745	0.000978396	19754	5972	-0.30137	0.634496	36247	34599	orf19.2250 (SPE3)	SPE3	Spermidine synthase, involved in biosynthesis of spermidine and also in biosynthesis of pantothenic acid; spermidine is required for growth of wild-type cells
CPAR2_102440		-0.404076	0.915371	54759	40006	-1.06782	4.16458e-11	46852	25035	-2.127	7.99985e-08	47380	14222	-0.375422	0.622662	125863	111369	orf19.242.2	YSY6	Protein whose expression suppresses a secretory pathway mutation in E. coli; has similarity to the mammalian RAMP4 protein involved in secretion
CPAR2_203280		2.02967	7.33732e-18	572	2274	0.366127	0.294744	705	1007	2.12697	6.79958e-14	590	3513	-0.00662376	0.992281	765	885	No C.albicans ortholog
CPAR2_802020		-0.854471	0.152923	10670	5774	-0.399353	0.248519	9088	7710	-2.1265	4.39443e-07	7894	2428	0.0826752	0.844306	4276	5250	orf19.2382	ISM1	Mitochondrial isoleucyl-tRNA synthetase, null mutant is deficient in respiratory growth
CPAR2_107790		0.195208	0.34247	4155	4632	2.12455	7.26699e-60	5473	26669	0.516558	0.114362	4865	9214	-0.138737	0.716311	10860	11503	orf19.432	YDR306C	F-box protein of unknown function; interacts with Sgt1p via a Leucine-Rich Repeat (LRR) domain
CPAR2_209950		0.31721	0.921762	1664	2029	0.113988	0.891217	1166	1429	2.12348	0.000908023	1168	7037	-0.0886681	0.870208	4266	4673	orf19.5207	DPH1	Protein required, along with Dph2p, Kti11p, Jjj3p, and Dph5p, for synthesis of diphthamide, which is a modified histidine residue of translation elongation factor 2 (Eft1p or Eft2p); may act in a complex with Dph2p and Kti11p
CPAR2_209460		0.667877	NA	30243	47641	-1.46928	3.52083e-07	144549	58053	-2.12321	3.04833e-13	141140	43056	0.0957354	0.804658	1972	2453	orf19.6882 (OSM1)
CPAR2_302180		-0.532386	0.313842	8650	5837	-0.837796	0.000101706	12254	7620	-2.12063	3.65714e-09	11584	3603	0.0369373	0.921108	5932	7072	orf19.5296	COA1	Mitochondrial inner membrane protein required for assembly of the cytochrome c oxidase complex (complex IV); interacts with complex IV assembly factor Shy1p during the early stages of assembly
CPAR2_704350		0.0094262	0.998689	1248	1225	0.227196	0.457522	1793	2352	2.11646	5.71617e-06	1314	7310	-0.104628	0.875299	984	1082	orf19.2184
CPAR2_107930		-0.0886668	0.99161	16495	15112	-0.532183	0.0471628	46306	36121	-2.11611	1.24501e-06	51993	15807	-0.230475	0.711297	29571	29244	orf19.446.1
CPAR2_300820		0.230214	0.99233	3649	4192	-0.358112	0.567841	2639	2323	2.1155	0.000594691	1960	11664	-0.294989	0.588141	13431	12850	orf19.7154 (UTP18)	UTP18	Possible U3 snoRNP protein involved in maturation of pre-18S rRNA, based on computational analysis of large-scale protein-protein interaction data
CPAR2_400880		0.254641	0.686709	1968	2285	2.11498	1.38168e-35	2542	12317	1.04776	0.0377444	2017	5413	0.410826	0.55524	381	589	No C.albicans ortholog
CPAR2_703960		0.378757	0.808641	3710	4713	-0.290786	0.728858	2452	2275	2.11436	0.00133875	1812	10853	-0.448919	0.505749	11081	9687	orf19.7197	NOC3	Protein that forms a nuclear complex with Noc2p that binds to 66S ribosomal precursors to mediate their intranuclear transport; also binds to chromatin to promote the association of DNA replication factors and replication initiation
CPAR2_102140		0.271284	0.992929	248	289	-0.492509	0.539284	233	184	-2.11355	0.0465511	568	188	-0.274116	0.620615	1347	1317	orf19.271 (ADH4)
CPAR2_213600		0.721229	0.39524	5995	9551	-2.11115	3.47987e-06	19814	5169	-0.351025	0.594603	13240	14526	-0.0712969	0.910359	8062	8997	orf19.2114
CPAR2_702880		-0.364621	0.954081	8690	6524	-0.859647	5.22639e-08	7864	4885	-2.10876	1.58664e-05	8784	2681	-0.530955	0.543878	14259	11585	orf19.7163
CPAR2_300740		-0.243106	0.99233	225	186	-2.10828	1.35711e-06	1312	334	-0.61987	0.225281	1684	1509	0.313496	0.825119	66	97	No C.albicans ortholog
CPAR2_205090		1.05232	0.172561	53	107	2.10537	0.000130635	82	393	1.28274	0.13361	99	308	-0.116376	0.891759	241	261	No C.albicans ortholog
CPAR2_103800		-0.0612254	0.993547	88678	83087	-0.288024	0.178197	339530	309826	-2.10371	3.22359e-08	382206	116255	-0.504195	0.479266	202780	167655	orf19.2439.1	QCR10	Subunit of the ubiqunol-cytochrome c oxidoreductase complex which includes Cobp, Rip1p, Cyt1p, Cor1p, Qcr2p, Qcr6p, Qcr7p, Qcr8p, Qcr9p, and Qcr10p and comprises part of the mitochondrial respiratory chain
CPAR2_800350		0.479439	0.99233	143	196	2.10332	7.06855e-24	858	4123	0.947167	0.0277531	662	1677	-0.493926	0.177146	1338	1102	No C.albicans ortholog
CPAR2_303750		0.315102	0.99233	385	468	0.716215	0.183286	1030	1901	2.09921	0.0100741	710	4387	0.0502856	0.920951	819	993	orf19.921
CPAR2_205320		-0.314236	0.992929	5630	4463	0.603207	0.00758351	6703	11544	2.09582	5.39328e-09	5068	28414	0.210427	0.661227	5923	8091	orf19.6632 (ACO2)	ACO2	Putative mitochondrial aconitase isozyme; similarity to Aco1p, an aconitase required for the TCA cycle; expression induced during growth on glucose, by amino acid starvation via Gcn4p, and repressed on ethanol
CPAR2_704070		0.507809	0.910599	277	382	0.299169	0.80291	205	283	2.09557	0.000140372	177	1081	-0.471867	0.629408	1592	1338	orf19.1344
CPAR2_105770		-0.399899	0.72489	8540	6324	-0.681864	0.000481567	11900	8254	-2.09506	4.38563e-05	10403	3326	-0.110579	0.765098	3960	4295	orf19.6057	ECM31	Ketopantoate hydroxymethyltransferase, required for pantothenic acid biosynthesis, converts 2-oxoisovalerate into 2-dehydropantoate
CPAR2_101760		-0.745473	0.415333	8456	4930	-2.08737	1.75179e-22	5716	1495	-0.220079	0.810799	3137	3737	-0.634084	0.0584354	4670	3506	orf19.6659 (GAP6)
CPAR2_500390		0.531489	0.597242	22410	31648	0.93766	2.22456e-05	28001	60381	2.08692	3.4118e-06	32782	184620	0.101998	0.882049	134246	169402	orf19.2770.1 (SOD1)	SOD1	Cytosolic copper-zinc superoxide dismutase; some mutations are analogous to those that cause ALS (amyotrophic lateral sclerosis) in humans
CPAR2_209100		0.269304	0.682677	7886	9268	2.08549	2.15317e-12	14768	69586	0.617651	0.15469	10188	21440	0.338028	0.557083	5128	7422	orf19.2296
CPAR2_702140	CYS3	1.29329	9.57962e-06	14436	34575	0.914564	6.20258e-05	8670	18382	2.08171	9.57272e-09	8669	50780	-0.0668586	0.88004	7342	8185	orf19.6402 (CYS3)	CYS3	Cystathionine gamma-lyase, catalyzes one of the two reactions involved in the transsulfuration pathway that yields cysteine from homocysteine with the intermediary formation of cystathionine
CPAR2_103960		0.118342	0.992929	3777	4017	-0.300131	0.672693	2368	2160	2.07735	4.29367e-05	1654	9579	-0.000556264	0.99826	6927	7949	orf19.4492	EBP2	Required for 25S rRNA maturation and 60S ribosomal subunit assembly; localizes to the nucleolus and in foci along nuclear periphery; constituent of 66S pre-ribosomal particles; cooperates with Rrs1p and Mps3p to mediate telomere clustering by binding Sir4p, but is not involved in telomere tethering
CPAR2_805780		0.0495719	0.993547	1229	1239	0.438204	0.425819	320	484	2.07722	0.000162992	240	1454	0.327507	0.760356	481	683	orf19.7441	BRR6	Essential nuclear envelope integral membrane protein required for nuclear envelope morphology, nuclear pore complex localization, nuclear export; exhibits synthetic lethal genetic interactions with genes involved in lipid metabolism
CPAR2_808040		-0.329514	0.474866	40270	31139	-0.655513	0.00215897	23473	16632	-2.07375	1.918e-08	20185	6292	-0.440177	0.263344	71183	61764	orf19.6176 (SEC61)	SEC61	Essential subunit of Sec61 complex (Sec61p, Sbh1p, and Sss1p); forms a channel for SRP-dependent protein import and retrograde transport of misfolded proteins out of the ER; with Sec63 complex allows SRP-independent protein import into ER
CPAR2_102730		-0.149598	0.992929	1348	1187	-0.11561	0.723388	1796	1858	2.07317	0.000371247	1495	8354	-0.42732	0.319301	10521	9296	orf19.5856
CPAR2_404480		0.131421	0.992929	19271	20469	-0.615739	0.00502521	18752	13657	-2.07283	0.000104766	17714	5565	-0.72341	0.185051	86520	62813	orf19.7409 (ERV25)	ERV25	Protein that forms a heterotrimeric complex with Erp1, Erp2p, and Emp24, member of the p24 family involved in endoplasmic reticulum to Golgi transport
CPAR2_204090		0.636349	0.971636	1990	2993	0.915817	0.0149705	6612	13938	2.07258	0.00081297	3129	17363	0.603643	0.615938	449	811	No C.albicans ortholog
CPAR2_211970		-0.412574	0.988023	10717	7915	-0.0362402	0.93344	16687	18427	2.07176	1.13261e-06	14443	79258	0.067738	0.878146	38432	47294	orf19.1517 (ARO3)	ARO3	3-deoxy-D-arabino-heptulosonate-7-phosphate (DAHP) synthase, catalyzes the first step in aromatic amino acid biosynthesis and is feedback-inhibited by phenylalanine or high concentration of tyrosine or tryptophan
CPAR2_104930		-0.318069	0.597992	7826	6127	0.248607	0.577565	10178	13527	2.06912	0.000550111	7222	38068	1.04461	0.000567282	2746	6545	orf19.2196	CUE3	Protein of unknown function; has a CUE domain that binds ubiquitin, which may facilitate intramolecular monoubiquitination
CPAR2_105010		0.0853436	0.993547	2487	2582	-0.106651	0.910589	1511	1580	2.06689	0.000460473	1287	7408	-0.204687	0.633649	7578	7711	orf19.1902 (NOC4)	NOC4	Nucleolar protein, forms a complex with Nop14p that mediates maturation and nuclear export of 40S ribosomal subunits
CPAR2_401890		0.24994	0.992929	5351	6245	0.00280347	0.997716	3660	4121	2.06486	1.9669e-07	2614	15015	-0.0274956	0.947294	10984	12493	orf19.2917	NUG1	GTPase that associates with nuclear 60S pre-ribosomes, required for export of 60S ribosomal subunits from the nucleus
CPAR2_403050		-0.205726	0.992929	14742	12384	-0.797957	5.82644e-06	18065	11611	-2.06373	5.61516e-15	18076	5805	-0.0947664	0.88004	8982	9727	orf19.3774.1	HUB1	Ubiquitin-like protein modifier; promotes alternative splicing of SRC1 pre-mRNA; binds non-covalently to the HIND domain of Snu66, may function in modification of Sph1p and Hbt1p, functionally complemented by the human or S. pombe ortholog; mechanism of Hub1p adduct formation not yet clear
CPAR2_204570		0.305715	0.986394	5107	6187	-0.352041	0.641558	3143	2785	2.06153	0.00967845	2775	15974	-0.224996	0.462919	25194	25078	orf19.5850 (NOC2)	NOC2	Protein that forms a nucleolar complex with Mak21p that binds to 90S and 66S pre-ribosomes, as well as a nuclear complex with Noc3p that binds to 66S pre-ribosomes; both complexes mediate intranuclear transport of ribosomal precursors
CPAR2_204020		0.26827	0.58812	57461	67307	0.00380302	0.995042	86630	98301	-2.05849	8.67015e-08	101370	32434	-0.365344	0.642236	32833	30126	orf19.6318	YJR085C	Putative protein of unknown function; GFP-fusion protein is induced in response to the DNA-damaging agent MMS; the authentic, non-tagged protein is detected in highly purified mitochondria in high-throughput studies
CPAR2_109380		0.453339	0.910599	973	1289	1.08832	3.03406e-05	1020	2420	2.05754	5.04331e-08	917	5152	-0.010159	0.990869	1055	1239	orf19.3351
CPAR2_300800		1.06361	1.17849e-19	16115	32792	2.05704	5.85801e-28	21446	99967	0.430753	0.446632	18084	31374	0.331026	0.479266	6823	10051	orf19.7152
CPAR2_210970		0.487418	0.448395	6098	8330	-0.109797	0.884787	3948	4158	2.05642	0.0106265	3602	20630	-0.30444	0.453334	28345	26728	orf19.809	NOP12	Nucleolar protein involved in pre-25S rRNA processing and biogenesis of large 60S ribosomal subunit; contains an RNA recognition motif (RRM); binds to Ebp2; similar to Nop13p and Nsr1p
CPAR2_208660		0.0560605	0.993547	12038	12124	-1.02348	0.0116421	19066	10790	-2.05625	0.00242237	29011	9460	-0.205635	0.717876	18133	18212	orf19.2794	YBL036C	Putative non-specific single-domain racemase based on structural similarity; binds pyridoxal 5'-phosphate; expression of GFP-fusion protein induced in response to the DNA-damaging agent MMS
CPAR2_503790		0.131689	0.992929	2060	2210	-0.48126	0.468467	1952	1553	2.05586	0.00898404	1270	7388	-0.291743	0.646395	5443	5225	orf19.1708	RRT14	Putative protein of unknown function; identified in a screen for mutants with decreased levels of rDNA transcription; green fluorescent protein (GFP)-fusion protein localizes to the nucleolus; predicted to be involved in ribosome biogenesis
CPAR2_106320		-0.322179	0.0441232	342578	266620	-1.23224	0.000305804	317947	153888	-2.05519	0.000244456	357071	114714	-0.463104	0.54212	458897	388629	orf19.3690.2	RPL26B	Protein component of the large (60S) ribosomal subunit, nearly identical to Rpl26Ap and has similarity to E. coli L24 and rat L26 ribosomal proteins; binds to 5.8S rRNA
CPAR2_401800		-0.410896	0.292409	326848	239210	-1.85208	1.50759e-16	491201	153020	-2.05515	0.0240614	567983	184501	-0.451437	0.519388	902481	777724	orf19.3788.1 (RPL30)	RPL30	Protein component of the large (60S) ribosomal subunit, has similarity to rat L30 ribosomal protein; involved in pre-rRNA processing in the nucleolus; autoregulates splicing of its transcript
CPAR2_206590		0.0864414	0.993547	4499	4692	-0.377897	0.658652	2721	2349	2.05474	0.000901463	1809	10296	0.032682	0.946405	10647	12609	orf19.3547	PUF6	Pumilio-homology domain protein that binds the 3' UTR of ASH1 mRNA and represses its translation, resulting in proper asymmetric localization of ASH1 mRNA; also co-sediments with the 60S ribosomal subunit and is required for its biogenesis
CPAR2_501210		-0.544345	0.316165	276	184	-0.670528	0.603999	240	168	2.05181	1.94721e-08	150	855	-0.456287	0.588141	903	789	orf19.3142
CPAR2_102580		0.62095	0.864486	4576	6797	-2.04977	2.65983e-15	2319	626	-0.483353	0.245209	1054	1005	0.473874	0.586115	999	1573	No C.albicans ortholog
CPAR2_104820		0.843838	0.0239867	242	424	2.04885	9.71465e-07	471	2122	0.634083	0.21282	329	666	0.016717	0.985148	336	394	orf19.5479 (FGR12)
CPAR2_402720		-0.634949	0.687972	10289	6496	0.550455	0.0512693	12389	20373	2.04811	9.68266e-06	9439	50063	0.637813	0.0103949	5513	9868	orf19.5639 (HIS4)	HIS4	Multifunctional enzyme containing phosphoribosyl-ATP pyrophosphatase, phosphoribosyl-AMP cyclohydrolase, and histidinol dehydrogenase activities; catalyzes the second, third, ninth and tenth steps in histidine biosynthesis
CPAR2_202240		-0.297929	0.831916	176047	139771	-1.44422	9.92169e-17	123275	50857	-2.0471	0.0100916	115271	37265	-0.205441	0.679111	134106	135755	orf19.493 (RPL15A)	RPL15B	Protein component of the large (60S) ribosomal subunit, nearly identical to Rpl15Ap and has similarity to rat L15 ribosomal protein; binds to 5.8 S rRNA
CPAR2_804990		0.32179	0.680352	12360	15030	0.940861	0.00770285	7882	16962	2.04483	0.0015823	5564	33685	0.381935	0.634496	18811	28061	orf19.4906	BCK2	Protein rich in serine and threonine residues involved in protein kinase C signaling pathway, which controls cell integrity; overproduction suppresses pkc1 mutations
CPAR2_406450		0.000740963	0.999549	804	783	0.613019	0.0214272	1051	1812	2.04398	7.98542e-06	1065	5725	0.0193592	0.959327	1856	2197	orf19.2281
CPAR2_407570		0.793443	0.929536	73	122	0.669338	0.80306	8	14	2.03978	0.0170528	14	78	-0.163607	0.891759	143	150	No C.albicans ortholog
CPAR2_405470		0.521192	0.984943	137	189	-2.03913	NA	248	66	1.74591	0.0668878	14	66	0.331826	0.728436	241	352	orf19.5975
CPAR2_407560		-0.0860921	0.993547	1112	1014	-0.263502	0.758201	156	146	2.03774	0.0160163	103	606	0.035485	0.955739	698	845	orf19.2179 (SIT1)	ARN1	Transporter, member of the ARN family of transporters that specifically recognize siderophore-iron chelates; responsible for uptake of iron bound to ferrirubin, ferrirhodin, and related siderophores
CPAR2_102150		-0.198115	0.992929	686	578	-0.760999	0.00397191	1222	799	-2.03713	0.000254899	1323	464	0.317163	0.634496	1765	2517	orf19.270
CPAR2_404890		-0.378196	0.860377	127245	95735	-1.51989	8.97453e-08	122574	47848	-2.03619	0.0034334	115182	37161	-0.345221	0.611791	218369	202707	orf19.1635 (RPL12)	RPL12A	Protein component of the large (60S) ribosomal subunit, nearly identical to Rpl12Bp; rpl12a rpl12b double mutant exhibits slow growth and slow translation; has similarity to E. coli L11 and rat L12 ribosomal proteins
CPAR2_801350	MET2	1.41466	4.91642e-45	8818	22891	2.03563	6.8718e-31	9637	44594	0.848733	0.0215002	9816	23439	-0.0746266	0.841407	10147	11255	orf19.2618 (MET2)	MET2	L-homoserine-O-acetyltransferase, catalyzes the conversion of homoserine to O-acetyl homoserine which is the first step of the methionine biosynthetic pathway
CPAR2_404310		0.960888	0.260822	14976	28543	1.45411	6.02548e-10	30012	92492	-2.03482	0.00507169	30159	9800	-0.390153	0.56421	9812	8840	orf19.5323 (MDH1-3)	MDH3	Peroxisomal malate dehydrogenase, catalyzes interconversion of malate and oxaloacetate; involved in the glyoxylate cycle
CPAR2_401810		-0.333167	0.881887	93565	72554	-1.42237	1.39817e-07	65856	27552	-2.03375	0.00128999	61787	19920	-0.262071	0.65217	88461	86647	orf19.3789 (RPL24A)	RPL24A	Ribosomal protein L30 of the large (60S) ribosomal subunit, nearly identical to Rpl24Bp and has similarity to rat L24 ribosomal protein; not essential for translation but may be required for normal translation rate
CPAR2_109250		-0.409742	0.849873	116225	85592	-1.56985	1.07121e-09	73194	27576	-2.03028	0.000917175	61542	19918	-0.223578	0.689935	79132	79105	orf19.3334 (RPS21)	RPS2	Protein component of the small (40S) subunit, essential for control of translational accuracy; phosphorylation by C-terminal domain kinase I (CTDK-I) enhances translational accuracy; methylated on one or more arginine residues by Hmt1p
CPAR2_603220		-0.0543437	0.992929	790	741	0.14341	0.79663	946	1160	2.02797	0.000607885	763	3997	0.307386	0.634496	381	551	orf19.100
CPAR2_208360		0.0693175	0.993547	26457	27123	-0.558096	0.0183648	53722	41026	-2.02591	7.21815e-06	57000	18182	-0.279901	0.640245	16296	15782	orf19.5054	BNA6	Quinolinate phosphoribosyl transferase, required for the de novo biosynthesis of NAD from tryptophan via kynurenine; expression regulated by Hst1p
CPAR2_212830		-0.0965644	0.993547	2543	2300	-1.00797	1.08689e-06	2702	1517	-2.02559	0.0125053	3628	1247	-0.155217	0.849172	2035	2119	orf19.2018.1
CPAR2_602140		0.180366	0.743865	1730	1910	0.0836624	0.862185	1229	1466	2.02491	2.3444e-10	863	4764	-0.0745642	0.875748	1368	1517	orf19.686	YNL193W	Putative protein of unknown function; exhibits a two-hybrid interaction with Yhr151cp in a large-scale analysis
CPAR2_701180		0.104177	0.993547	1461	1542	-0.139037	0.889862	985	1007	2.02463	0.0247032	675	3889	-0.10416	0.868002	2357	2568	orf19.7546	RRP3	Protein involved in rRNA processing; required for maturation of the 35S primary transcript of pre-rRNA and for cleavage leading to mature 18S rRNA; homologous to eIF-4a, which is a DEAD box RNA-dependent ATPase with helicase activity
CPAR2_601700		-0.0579437	0.99233	9502	8882	-0.222081	0.405279	10063	9618	-2.0225	1.38582e-10	10119	3333	-0.21833	0.684904	2386	2405	orf19.5522
CPAR2_302950		2.02223	1.38613e-08	2062	8160	-0.209962	0.612641	2902	2803	1.92325	1.01605e-07	2635	13471	0.281306	0.634496	783	1100	orf19.3901
CPAR2_210140		0.30214	0.797945	8279	9904	-2.0187	3.33031e-16	2062	566	1.24983	0.0109963	1698	5661	0.683424	0.00014051	2015	3756	orf19.3538 (FRE9)
CPAR2_703750		0.298286	0.983519	3279	3952	-0.0816602	0.910648	1650	1762	2.01859	0.000105748	1282	7200	0.0594168	0.933802	2772	3295	orf19.6686 (ENP2)	ENP2	Essential nucleolar protein, required for biogenesis of the small ribosomal subunit; contains WD repeats, interacts with Mpp10p and Bfr2p, and has homology to Spb1p
CPAR2_213930		0.68461	0.0123521	1843	2891	0.557376	0.0107444	2157	3537	2.01676	1.27479e-15	2291	12612	0.506908	0.0819798	1786	2980	No C.albicans ortholog
CPAR2_107460		0.378913	0.921822	6067	7641	0.957972	0.0105775	11918	25977	2.01604	8.96491e-06	11722	62453	-0.0213961	0.976657	14152	16693	orf19.2480.1 (AUT7)	ATG8	Component of autophagosomes and Cvt vesicles; undergoes conjugation to phosphatidylethanolamine (PE); Atg8p-PE is anchored to membranes, is involved in phagophore expansion, and may mediate membrane fusion during autophagosome formation
CPAR2_800440		0.149101	0.992929	2613	2830	0.160753	0.813007	1444	1810	2.01562	0.0168133	791	4818	-0.0384233	0.959542	3801	4231	orf19.7539 (INO2)
CPAR2_109780		0.0721548	0.993547	3006	3094	-1.4246	5.81214e-07	8862	3662	-2.01364	4.20169e-08	6532	2137	-0.255552	0.620615	2663	2616	orf19.3306	HOP1	Meiosis-specific DNA binding protein that displays Red1p dependent localization to the unsynapsed axial-lateral elements of the synaptonemal complex; required for homologous chromosome synapsis and chiasma formation
CPAR2_602110		-0.170301	0.548858	37970	32861	-0.471486	0.0257181	30419	24580	-2.01286	9.26281e-05	28789	9572	-0.363635	0.634496	15105	13926	orf19.3391 (ADK1)	ADK1	Adenylate kinase, required for purine metabolism; localized to the cytoplasm and the mitochondria; lacks cleavable signal sequence
CPAR2_300240		-0.318595	0.841358	166894	130482	-1.59284	3.81625e-11	146683	54707	-2.01121	0.0141089	145875	47969	-0.32767	0.514532	342187	320365	orf19.7018 (RPS18)	RPS18B	Protein component of the small (40S) ribosomal subunit; nearly identical to Rps18Ap and has similarity to E. coli S13 and rat S18 ribosomal proteins
CPAR2_700020		1.29003	0.21404	149	353	0.680181	0.203587	164	293	2.00954	0.000128988	268	1482	0.0822864	0.925649	151	187	No C.albicans ortholog
CPAR2_208910		0.222923	0.988692	173	196	0.740773	0.100286	268	501	2.00211	0.00183188	326	1789	-0.503357	0.234279	1683	1391	orf19.6222.1
CPAR2_206020		0.207678	0.992929	83748	94966	-1.14969	3.55478e-07	193698	97271	-2.00095	1.51765e-06	186464	60199	-0.0157298	0.973516	17753	20616	orf19.542 (HXK2)	HXK2	Hexokinase isoenzyme 2 that catalyzes phosphorylation of glucose in the cytosol; predominant hexokinase during growth on glucose; functions in the nucleus to repress expression of HXK1 and GLK1 and to induce expression of its own gene
CPAR2_213380		-0.0400415	0.998689	87	82	-0.820526	0.6563	1579	1011	1.99926	NA	749	3537	-0.0296164	0.981081	301	341	No C.albicans ortholog
CPAR2_213530		0.15855	0.992929	33532	36352	-1.99463	2.11636e-20	351294	98896	-0.325957	0.886379	375687	351430	-0.365688	0.673103	23006	20673	orf19.2107.1 (STF2)	TMA10	Protein of unknown function that associates with ribosomes; putative homolog of the F1F0-ATPase synthase regulator Stf2p
CPAR2_503730		-0.354692	0.93924	244158	187013	-0.99585	0.000105507	225340	126357	-1.98869	0.00167172	209445	70300	-0.0781067	0.867819	285335	311860	orf19.1700 (RPS7A)	RPS7A	Protein component of the small (40S) ribosomal subunit, nearly identical to Rps7Bp; interacts with Kti11p; deletion causes hypersensitivity to zymocin; has similarity to rat S7 and Xenopus S8 ribosomal proteins
CPAR2_102640		0.283155	0.515494	25310	29972	-0.482599	0.12091	82383	67200	-1.98666	0.000908023	102336	34933	-0.318271	0.588141	90660	84791	orf19.332.1
CPAR2_108320		0.0687508	0.993547	2387	2446	1.75288	3.2516e-09	9962	37614	1.98303	0.000517137	7308	38458	1.68251	0.150049	124	440	orf19.4526 (HSP30)	HSP30	Hydrophobic plasma membrane localized, stress-responsive protein that negatively regulates the H(+)-ATPase Pma1p; induced by heat shock, ethanol treatment, weak organic acid, glucose limitation, and entry into stationary phase
CPAR2_603210		0.0248455	0.993547	1721	1705	-0.234979	0.500696	2246	2130	1.98244	0.000319118	1840	9156	0.151741	0.767341	1362	1777	orf19.103 (KAR5)	KAR5	Protein required for nuclear membrane fusion during karyogamy, localizes to the membrane with a soluble portion in the endoplasmic reticulum lumen, may form a complex with Jem1p and Kar2p; expression of the gene is regulated by pheromone
CPAR2_212840		-0.456988	0.277618	26562	18786	-1.04961	1.82157e-05	30091	16547	-1.97867	0.0223408	40144	13935	-0.187831	0.750997	38948	39848	orf19.2019	MRPL16	Mitochondrial ribosomal protein of the large subunit
CPAR2_600290		0.541074	0.789085	214	302	0.398793	0.516954	289	432	1.97708	1.10315e-05	161	845	0.366517	0.633691	353	522	No C.albicans ortholog
CPAR2_802460		-0.223236	0.869408	120861	100597	-1.10885	0.00213665	87355	46156	-1.97442	0.0261374	87800	30141	-0.509272	0.401172	382911	314139	orf19.3268 (TMA19)	TMA19	Protein that associates with ribosomes; homolog of translationally controlled tumor protein; green fluorescent protein (GFP)-fusion protein localizes to the cytoplasm and relocates to the mitochondrial outer surface upon oxidative stress
CPAR2_800380		0.290522	0.571018	2396	2859	0.870045	6.97661e-05	5517	11347	1.9719	2.71548e-06	5076	25758	-0.0624006	0.924425	6247	7048	orf19.7499.1
CPAR2_105690		0.475542	0.863798	19446	26135	-0.810128	0.0175709	4976	3212	1.97145	0.00576658	6345	33832	0.649293	2.72142e-07	26818	48960	orf19.6073 (HMX1)	HMX1	ER localized heme oxygenase, involved in heme degradation during iron starvation and in the oxidative stress response; expression is regulated by AFT1 and oxidative stress; relocates to the perinuclear region in the presence of oxidants
CPAR2_404420		-0.282359	0.921616	5486	4411	-1.01965	4.65058e-06	16820	9225	-1.97116	1.30086e-05	19332	6356	-0.20487	0.734062	5636	5766	orf19.5920
CPAR2_204980		0.161233	0.992929	2918	3204	-0.432793	0.586629	3699	3082	1.97056	0.00100941	3059	16417	-0.408461	0.455561	21970	19623	orf19.3867 (RPL7)	RLP7	Nucleolar protein with similarity to large ribosomal subunit L7 proteins; constituent of 66S pre-ribosomal particles; plays an essential role in processing of precursors to the large ribosomal subunit RNAs
CPAR2_210920		-0.12355	0.993547	3475	3131	-0.00959296	0.992501	2012	2251	1.96873	9.59668e-06	1308	7005	-0.0307264	0.950434	6255	7053	orf19.1566 (UTP21)	UTP21	Subunit of U3-containing 90S preribosome and Small Subunit (SSU) processome complexes involved in production of 18S rRNA and assembly of small ribosomal subunit; synthetic defect with STI1 Hsp90 cochaperone; human homolog linked to glaucoma
CPAR2_802320		-0.25518	0.984943	23724	19253	-0.454858	0.142006	26126	21744	-1.96847	4.19313e-06	30584	10291	-0.00827773	0.993614	15432	17556	orf19.2402 (SSU72)	SSU72	Transcription/RNA-processing factor that associates with TFIIB and cleavage/polyadenylation factor Pta1p; exhibits phosphatase activity on serine-5 of the RNA polymerase II C-terminal domain; affects start site selection in vivo
CPAR2_204230		0.0756684	0.993547	23266	23683	-0.357276	0.348966	18015	16079	-1.96788	0.000714161	22656	7715	-0.11084	0.803886	31160	33905	orf19.547	RAD27	5' to 3' exonuclease, 5' flap endonuclease, required for Okazaki fragment processing and maturation as well as for long-patch base-excision repair; member of the S. pombe RAD2/FEN1 family
CPAR2_107470		-0.399559	0.813752	117762	87201	-1.58198	3.13979e-09	77251	28967	-1.96139	0.0403693	79174	26988	-0.566225	0.35956	248011	199946	orf19.2478.1	RPL7A	Protein component of the large (60S) ribosomal subunit, nearly identical to Rpl7Bp and has similarity to E. coli L30 and rat L7 ribosomal proteins; contains a conserved C-terminal Nucleic acid Binding Domain (NDB2)
CPAR2_801320		-1.49181	7.45514e-13	2305	799	-0.821251	0.000210377	2165	1375	1.04843	0.00502215	756	2050	-1.9576	6.77485e-24	3734	1112	orf19.3743
CPAR2_300610		-0.445062	0.921616	142	102	0.263183	0.785959	186	254	-1.95415	0.0044745	253	85	-1.09535	0.457485	96	52	No C.albicans ortholog
CPAR2_806490		0.109943	0.839183	50662	53219	0.719088	0.0025312	98206	180371	1.9541	2.37301e-06	75272	395045	0.290296	0.714398	72484	101047	orf19.220 (PIR1)	PIR1	O-glycosylated protein required for cell wall stability; attached to the cell wall via beta-1,3-glucan; mediates mitochondrial translocation of Apn1p; expression regulated by the cell integrity pathway and by Swi5p during the cell cycle
CPAR2_203560		0.0681257	0.993547	930	946	-1.37314	0.00028594	1178	512	-1.95386	3.95921e-06	1197	412	-0.32956	0.648647	1490	1383	No C.albicans ortholog
CPAR2_211010		-0.392406	0.172561	8834	6545	-0.151338	0.602862	10652	10704	-1.95384	2.93629e-13	11676	4037	-0.108045	0.843642	5154	5571	orf19.805	YGR021W	Putative protein of unknown function; the authentic, non-tagged protein is detected in highly purified mitochondria in high-throughput studies
CPAR2_807390		0.194697	0.992929	21230	23385	-1.95341	1.19724e-09	1500	433	0.386302	0.574923	1146	2024	1.02606	0.000676596	2739	6538	orf19.5952
CPAR2_105450		0.0663406	0.992929	2320	2363	-0.100898	0.900969	1687	1774	1.95131	0.0332073	1865	10048	-0.391819	0.192408	15299	13757	orf19.773	RSA3	Protein with a likely role in ribosomal maturation, required for accumulation of wild-type levels of large (60S) ribosomal subunits; binds to the helicase Dbp6p in pre-60S ribosomal particles in the nucleolus
CPAR2_404970		0.212322	0.992929	168	190	1.94726	6.38283e-07	137	600	1.18983	0.219932	213	682	-0.371923	0.610877	1278	1167	orf19.7396
CPAR2_808250		-0.981914	0.235345	199504	97733	-1.23655	7.97186e-09	257674	123023	-1.94333	3.04569e-07	294689	105091	0.194313	0.725372	42962	56514	orf19.6731
CPAR2_400600		-0.262735	0.680352	18954	15384	-0.976975	8.51912e-08	23591	13539	-1.94287	0.0127614	27079	9605	-0.0771556	0.875299	50824	56216	orf19.4577.3	TIM10	Essential protein of the mitochondrial intermembrane space, forms a complex with Tim9p (TIM10 complex) that delivers hydrophobic proteins to the TIM22 complex for insertion into the inner membrane
CPAR2_110400		0.471835	0.410137	459	618	1.55866	0.00170162	1035	3453	1.93978	0.00119368	884	4745	0.542749	0.379412	646	1075	orf19.4551 (CTN1)	YAT1	Outer mitochondrial carnitine acetyltransferase, minor ethanol-inducible enzyme involved in transport of activated acyl groups from the cytoplasm into the mitochondrial matrix; phosphorylated
CPAR2_803020		-0.42904	0.292818	383	277	-1.1836	0.00330378	402	199	1.93856	0.000382885	307	1584	-0.112892	0.825119	1010	1087	No C.albicans ortholog
CPAR2_303970		0.265366	0.831125	1124	1313	-0.471611	0.250042	969	785	1.93855	0.0116293	904	4767	-0.0546181	0.920951	7104	7936	orf19.934
CPAR2_501140		-0.0315211	0.999	5446	5134	0.602281	0.0384714	2211	3728	-1.9382	0.000167069	1942	685	-0.339813	0.40639	5733	5312	orf19.2896 (SOU1)
CPAR2_212780		-0.0916591	0.993547	38572	34939	-0.540573	0.02352	20324	15608	-1.93695	0.00238337	20415	7258	0.0832718	0.851979	16727	20477	orf19.4520	YDR248C	Putative protein of unknown function; sequence similarity to bacterial and human gluconokinase; green fluorescent protein (GFP)-fusion protein localizes to the cytoplasm; upregulated by deletion of the RNAP-II associated factor, PAF1
CPAR2_203210		0.0263003	0.999	352548	347664	-0.569511	0.00276002	435752	328210	-1.93679	4.04085e-06	441011	149363	-0.278964	0.715398	193068	184830	orf19.1854 (HHF22)	HHF2	Histone H4, core histone protein required for chromatin assembly and chromosome function; one of two identical histone proteins (see also HHF1); contributes to telomeric silencing; N-terminal domain involved in maintaining genomic integrity
CPAR2_803430		-0.13111	0.992929	84137	74453	0.166385	0.502209	101424	127011	-1.93632	8.50126e-09	102194	35763	-0.347622	0.593265	95609	87121	orf19.6264.3	YIP3	Protein localized to COPII vesicles, proposed to be involved in ER to Golgi transport; interacts with members of the Rab GTPase family and Yip1p; also interacts with Rtn1p
CPAR2_406905		-0.475955	0.863798	1229	856	0.542271	0.122332	979	1589	-1.93612	0.00061788	944	327	-0.00311335	0.997466	339	391	orf19.3626.1
CPAR2_301150		-0.183339	0.983519	4405	3793	0.625636	0.054652	7693	13345	1.93571	0.00098047	7612	37073	0.22033	0.562545	11123	15136	orf19.6489 (FMP45)	FMP45	Integral membrane protein localized to mitochondria (untagged protein); required for sporulation and maintaining sphingolipid content; has sequence similarity to SUR7 and YNL194C
CPAR2_110470		-0.606943	0.626436	60292	38760	-1.07996	3.76405e-07	55571	29399	-1.93368	0.000624797	46064	16129	-0.0349547	0.917171	43863	49750	orf19.6047 (TUF1)	TUF1	Mitochondrial translation elongation factor Tu; comprises both GTPase and guanine nucleotide exchange factor activities, while these activities are found in separate proteins in S. pombe and humans
CPAR2_407070		0.103	0.992929	2695	2833	0.0569601	0.941634	2565	2999	1.93215	8.68175e-07	2045	10499	-0.330164	0.600432	9583	9013	orf19.563 (RRP15)	RRP15	Nucleolar protein, constituent of pre-60S ribosomal particles; required for proper processing of the 27S pre-rRNA at the A3 and B1 sites to yield mature 5.8S and 25S rRNAs
CPAR2_701390		0.73736	0.910599	35	57	-0.773914	0.327678	126	82	1.42352	0.0268272	184	721	-1.93042	0.0531347	221	65	No C.albicans ortholog
CPAR2_208390	GCS1	0.980794	0.00856483	6111	11795	1.92963	3.55744e-24	5324	22438	1.07392	0.000183222	3996	11497	0.257812	0.634496	3003	4150	orf19.5059 (GCS1)	GSH1	Gamma glutamylcysteine synthetase catalyzes the first step in glutathione (GSH) biosynthesis; expression induced by oxidants, cadmium, and mercury
CPAR2_300390		0.308587	0.933073	5394	6535	-0.0769133	0.917841	4093	4373	1.92685	0.00246	3223	17021	0.0227158	0.965846	13965	16339	orf19.6902 (DBP7)	DBP7	Putative ATP-dependent RNA helicase of the DEAD-box family involved in ribosomal biogenesis; essential for growth under anaerobic conditions
CPAR2_403740		-0.503807	0.481461	12410	8556	-0.778012	0.000274386	16629	10806	-1.92551	7.78253e-08	15228	5335	-0.423245	0.629408	14714	13262	orf19.1300	OMS1	Protein integral to the mitochondrial membrane; has a conserved methyltransferase motif; multicopy suppressor of respiratory defects caused by OXA1 mutations
CPAR2_504170		-0.0163511	0.998689	283140	271669	-1.83657	1.44694e-07	266664	85510	-1.92494	NA	370209	133324	-0.368214	0.604324	1195180	1080846	orf19.5466 (RPS24)	RPS24B	Protein component of the small (40S) ribosomal subunit; identical to Rps24Ap and has similarity to rat S24 ribosomal protein
CPAR2_107020		0.0799483	0.993547	275049	281695	-0.19931	0.345878	610419	595005	-1.92472	3.2681e-07	592319	202666	-0.498297	0.459718	463573	388062	orf19.1059 (HHF1)	HHF1	Histone H4, core histone protein required for chromatin assembly and chromosome function; one of two identical histone proteins (see also HHF2); contributes to telomeric silencing; N-terminal domain involved in maintaining genomic integrity
CPAR2_801720		0.698256	0.248319	5467	8613	1.92381	1.42613e-19	8169	34755	0.218259	0.623058	9710	15178	-0.129426	0.825119	3610	3850	No C.albicans ortholog
CPAR2_803850		-0.0731902	0.994923	100	93	0.309843	0.483672	467	640	-1.92234	0.00201487	714	254	-0.235353	0.741214	856	845	No C.albicans ortholog
CPAR2_407950		0.26158	0.992929	37523	43406	-1.9173	9.1688e-25	10843	3204	-0.0263738	0.966504	8750	11976	0.235617	0.621405	5762	8012	orf19.5334	TIS11	mRNA-binding protein expressed during iron starvation; binds to a sequence element in the 3'-untranslated regions of specific mRNAs to mediate their degradation; involved in iron homeostasis
CPAR2_805040		-0.361636	0.273615	31700	24026	1.00608	0.000138178	22566	51025	1.91577	2.45099e-06	19753	101444	0.506711	0.380807	16040	26272	orf19.4886
CPAR2_100330		-0.0763644	0.992929	1086	1006	-0.204376	0.639045	984	955	1.91216	1.24626e-06	797	4010	-0.188634	0.825119	1014	1070	orf19.4337	ESBP6	Protein with similarity to monocarboxylate permeases, appears not to be involved in transport of monocarboxylates such as lactate, pyruvate or acetate across the plasma membrane
CPAR2_802240		-0.715251	0.646801	4172	2462	0.0496449	0.938041	8479	9788	-1.90887	2.27317e-06	8773	3058	0.373466	0.526212	598	902	orf19.2397
CPAR2_102840		-0.048384	0.99459	171351	161231	-1.90398	4.10057e-09	84486	25621	-1.17926	NA	105980	64255	-0.199467	0.601496	269129	272243	orf19.236 (RPL9B)	RPL9B	Protein component of the large (60S) ribosomal subunit, nearly identical to Rpl9Ap and has similarity to E. coli L6 and rat L9 ribosomal proteins
CPAR2_400920		-0.199358	0.754758	5495	4654	1.90382	1.2774e-17	3405	14185	0.852185	0.073808	2321	5893	0.123432	0.850719	3602	4503	orf19.4649 (ZCF27)
CPAR2_400930		0.283998	0.992929	6962	8175	0.451309	0.36951	407	614	1.90364	4.3988e-05	243	1273	0.328258	0.479266	1549	2252	orf19.4647 (HAP3)
CPAR2_208050		-0.277251	0.831916	2661	2144	0.273395	0.349595	3603	4847	1.90353	0.000218723	2556	12110	0.283393	0.539548	3872	5501	orf19.4446
CPAR2_704060		1.90339	0.0125392	397	1436	0.0377403	0.988589	2858	3270	1.72181	0.113084	3443	16543	0.600236	0.718929	81	144	No C.albicans ortholog
CPAR2_107840		-0.831695	0.000423737	8960	4910	-1.05427	4.22018e-07	9333	5047	0.134939	0.783391	5502	8279	-1.90115	5.31162e-28	8316	2584	No C.albicans ortholog
CPAR2_402090		-0.0368266	0.994923	12759	12139	1.20901	5.74411e-11	14118	36834	1.8988	2.53425e-08	8975	44638	0.633952	0.170494	3038	5421	orf19.789 (PYC2)	PYC2	Pyruvate carboxylase isoform, cytoplasmic enzyme that converts pyruvate to oxaloacetate; highly similar to isoform Pyc1p but differentially regulated; mutations in the human homolog are associated with lactic acidosis
CPAR2_101430		0.077213	0.993547	5046	5223	-0.346426	0.597378	3361	2977	1.89817	7.10455e-06	2382	12052	-0.099674	0.825119	5699	6163	orf19.3962 (HAS1)	HAS1	ATP-dependent RNA helicase; localizes to both the nuclear periphery and nucleolus; highly enriched in nuclear pore complex fractions; constituent of 66S pre-ribosomal particles
CPAR2_107130		0.131447	0.992929	5281	5673	-0.146736	0.840302	2854	2887	1.89469	0.00404864	1961	10040	-0.0289674	0.957886	9326	10563	orf19.1047 (ERB1)	ERB1	Constituent of 66S pre-ribosomal particles, forms a complex with Nop7p and Ytm1p that is required for maturation of the large ribosomal subunit; required for maturation of the 25S and 5.8S ribosomal RNAs; homologous to mammalian Bop1
CPAR2_407890		-0.103636	0.992929	137120	124038	-1.89358	1.11854e-14	70253	21520	-1.32841	NA	72800	38987	-0.0501285	0.903762	305341	339528	orf19.5341 (RPS4A)
CPAR2_203610		0.145729	0.894045	13356	14393	-0.383147	0.29481	16718	14272	1.89251	0.00307895	12174	62448	0.00554171	0.992334	24056	28232	orf19.1168 (ZCF3)
CPAR2_110290		-0.316798	0.875545	256893	201279	-1.52366	1.72516e-12	153321	59617	-1.89056	0.00836147	140843	50628	-0.114766	0.758671	208416	224607	orf19.3002 (RPS1)	RPS1B	Ribosomal protein 10 (rp10) of the small (40S) subunit; nearly identical to Rps1Ap and has similarity to rat S3a ribosomal protein
CPAR2_407200		-0.106007	0.993547	2370	2170	0.821781	0.00674414	2675	5302	1.88937	2.77607e-07	1611	7874	-0.250071	0.537998	5914	5748	orf19.1783 (YOR1)	YOR1	Plasma membrane ATP-binding cassette (ABC) transporter, multidrug transporter mediates export of many different organic anions including oligomycin; similar to human cystic fibrosis transmembrane receptor (CFTR)
CPAR2_105170		-0.325743	0.817745	13800	10760	-0.896411	1.01134e-07	17715	10608	-1.88806	0.00101281	16514	6154	0.0210534	0.95458	9130	10752	orf19.5201	RSM18	Mitochondrial ribosomal protein of the small subunit, has similarity to E. coli S18 ribosomal protein
CPAR2_100320		-0.325291	0.878821	178588	139213	-1.36648	1.05764e-10	137148	59429	-1.88767	0.00594384	124642	45086	-0.0968598	0.76701	90415	98759	orf19.4336 (RPS5)	RPS5	Protein component of the small (40S) ribosomal subunit, the least basic of the non-acidic ribosomal proteins; phosphorylated in vivo; essential for viability; has similarity to E. coli S7 and rat S5 ribosomal proteins
CPAR2_803990		-0.130619	0.992929	4200	3758	0.213205	0.734479	2403	3137	1.88559	1.09703e-07	1882	9353	-0.262778	0.567473	10136	9943	orf19.3276 (PWP2)	PWP2	Conserved 90S pre-ribosomal component essential for proper endonucleolytic cleavage of the 35 S rRNA precursor at A0, A1, and A2 sites; contains eight WD-repeats; PWP2 deletion leads to defects in cell cycle and bud morphogenesis
CPAR2_603570		-0.163844	0.992929	43234	37317	-0.691155	0.00402336	46161	32374	-1.88517	8.8806e-05	52879	18785	-0.372637	0.593265	38132	34217	orf19.1203.1
CPAR2_502070		-0.0468384	0.993547	5406	5116	0.277063	0.492066	5118	6966	1.87992	9.81951e-05	5605	28944	0.421977	0.539323	19056	29229	No C.albicans ortholog
CPAR2_403400		0.118877	0.992929	2940	3123	0.099938	0.888272	2708	3262	1.87893	7.23952e-07	2382	12010	-0.153344	0.722548	6840	7161	orf19.2667 (RPF1)	RPF1	Nucleolar protein involved in the assembly and export of the large ribosomal subunit; constituent of 66S pre-ribosomal particles; contains a sigma(70)-like motif, which is thought to bind RNA
CPAR2_502460		0.965371	0.157609	746	1411	0.144466	0.82691	1631	2020	1.87887	0.0026829	1967	10179	-1.13598	0.00645212	9098	4801	orf19.3902	YDL218W	Putative protein of unknown function; YDL218W transcription is regulated by Azf1p and induced by starvation and aerobic conditions; expression also induced in cells treated with the mycotoxin patulin
CPAR2_702550		0.367532	0.246175	4410	5528	1.87863	3.6299e-14	2402	9888	1.02919	0.0114167	1752	5018	0.0398454	0.955739	1681	1979	orf19.6544 (LPI9)	GIP3	Glc7-interacting protein whose overexpression relocalizes Glc7p from the nucleus and prevents chromosome segregation; may interact with ribosomes, based on co-purification experiments
CPAR2_207460		-0.0027842	0.99901	6043	5874	-1.75875	2.48888e-25	14494	4803	-1.8786	0.0106342	11228	4119	-0.346908	0.462919	11232	10417	orf19.4740	PTH1	One of two (see also PTH2) mitochondrially-localized peptidyl-tRNA hydrolases; dispensable for respiratory growth on rich medium, but required for respiratory growth on minimal medium
CPAR2_803070		-0.29038	0.388073	9033	7180	-0.556847	0.0391454	7585	5743	-1.87702	7.50909e-08	7656	2736	-0.540867	0.189661	17858	14504	orf19.2533.1	SBH2	Ssh1p-Sss1p-Sbh2p complex component, involved in protein translocation into the endoplasmic reticulum; homologous to Sbh1p
CPAR2_601450		-0.0300975	0.998689	1491	1432	-0.390477	0.669882	1319	1128	1.87362	0.00319117	906	4526	-0.440767	0.48175	3770	3288	orf19.3478 (NIP7)	NIP7	Nucleolar protein required for 60S ribosome subunit biogenesis, constituent of 66S pre-ribosomal particles; physically interacts with Nop8p and the exosome subunit Rrp43p
CPAR2_102130		-0.212121	0.863798	33983	28489	-0.579211	0.00989826	59502	43996	-1.87201	2.59497e-07	48540	17424	-0.646519	0.0472928	98030	73411	No C.albicans ortholog
CPAR2_801370		-0.145422	0.99233	5142	4538	0.439419	0.0906063	8011	12172	1.87138	6.98691e-06	5991	28448	0.648833	0.00430427	4308	7791	orf19.3722	FAP1	Protein that binds to Fpr1p, conferring rapamycin resistance by competing with rapamycin for Fpr1p binding; accumulates in the nucleus upon treatment of cells with rapamycin; has similarity to D. melanogaster shuttle craft and human NFX1
CPAR2_107970		-0.781866	0.740622	16219	9276	-0.147186	0.710123	22233	22460	1.87113	0.00024168	15258	70608	0.555267	0.038569	13003	21999	orf19.4060 (ARO4)	ARO4	3-deoxy-D-arabino-heptulosonate-7-phosphate (DAHP) synthase, catalyzes the first step in aromatic amino acid biosynthesis and is feedback-inhibited by tyrosine or high concentrations of phenylalanine or tryptophan
CPAR2_803750		0.639241	0.0717147	32144	48551	1.87065	8.07768e-20	44726	183825	-1.17585	0.0308214	49377	29697	-0.0209303	0.96451	26749	30677	orf19.7481 (MDH1)	MDH2	Cytoplasmic malate dehydrogenase, one of three isozymes that catalyze interconversion of malate and oxaloacetate; involved in the glyoxylate cycle and gluconeogenesis during growth on two-carbon compounds; interacts with Pck1p and Fbp1
CPAR2_101450		-0.0683283	0.992929	1794	1671	-0.301373	0.7323	1065	975	1.87003	0.000267528	709	3544	-0.364358	0.479266	2461	2267	orf19.3978
CPAR2_407550		-0.293058	0.811531	129494	102997	-1.56914	1.12185e-09	92192	34924	-1.86946	0.0164807	86944	31643	-0.589788	0.462996	341286	268578	orf19.2179.2 (RPS10)	RPS10A	Protein component of the small (40S) ribosomal subunit; nearly identical to Rps10Bp and has similarity to rat ribosomal protein S10
CPAR2_805110		0.814451	0.0250845	22634	38830	1.86824	3.7777e-12	19565	79566	0.993109	0.0046836	17632	46068	0.20697	0.634496	12639	16857	orf19.5263 (SER33)	SER3	3-phosphoglycerate dehydrogenase, catalyzes the first step in serine and glycine biosynthesis; isozyme of Ser33p
CPAR2_101440		-0.307181	0.831125	5305	4189	0.105798	0.825309	4617	5536	1.86738	0.000572355	3650	16839	0.585805	0.453108	1934	3445	orf19.3980	SLH1	Putative RNA helicase related to Ski2p, involved in translation inhibition of non-poly(A) mRNAs; required for repressing propagation of dsRNA viruses
CPAR2_209380		-0.417197	0.747405	167138	122246	-1.58195	4.91895e-12	103950	38877	-1.86704	0.0137026	89103	32583	-0.243659	0.564377	183475	182727	orf19.2309.2 (RPL2)	RPL2A	Protein component of the large (60S) ribosomal subunit, identical to Rpl2Bp and has similarity to E. coli L2 and rat L8 ribosomal proteins
CPAR2_204080		-0.438534	0.890405	88678	64092	-1.56213	8.79259e-07	47764	18077	-1.86281	0.0268293	39708	14403	-0.0719175	0.857092	40128	44570	orf19.6312 (RPS3)	RPS3	Protein component of the small (40S) ribosomal subunit, has apurinic/apyrimidinic (AP) endonuclease activity; essential for viability; has similarity to E. coli S3 and rat S3 ribosomal proteins
CPAR2_201830		0.30342	0.97141	1965	2375	-0.472	0.467021	1225	994	1.862	0.00430476	880	4451	-0.288349	0.620615	4293	4138	orf19.3756 (CHR1)	ROK1	RNA-dependent ATPase; involved in pre-rRNA processing at sites A0, A1, and A2, and in control of cell cycle progression; contains two upstream open reading frames (uORFs) in 5' untranslated region which regulate translation
CPAR2_404000		0.110106	0.992929	1308	1380	-0.320538	0.680915	1205	1093	1.86163	0.000123578	824	4134	0.0599451	0.910359	2986	3603	orf19.154	UTP30	Putative subunit of U3-containing 90S preribosome complex; complex is involved in production of 18S rRNA and assembly of small ribosomal subunit
CPAR2_209500		0.442137	0.255571	7689	10181	0.135623	0.857074	4961	6149	1.86105	0.00345596	3720	18829	-0.185156	0.734062	12512	12748	orf19.6886	NOP53	Nucleolar protein; involved in biogenesis of the 60S subunit of the ribosome; interacts with rRNA processing factors Cbf5p and Nop2p; null mutant is viable but growth is severely impaired
CPAR2_703130		-0.290904	0.46839	24059	19159	-0.750093	0.000477185	24324	16174	-1.85983	1.84658e-05	24479	8979	-0.53966	0.456712	23022	18886	orf19.3696 (TOM22)	TOM22	Component of the TOM (translocase of outer mitochondrial membrane) complex responsible for initial import of mitochondrially directed proteins; acts as a receptor for precursor proteins and mediates interaction between TOM and TIM complexes
CPAR2_601160		0.371129	0.831125	370	468	1.21726	8.28915e-05	897	2353	1.85819	0.00754133	848	3889	-0.152758	0.849172	447	463	No C.albicans ortholog
CPAR2_211370		0.1349	0.992929	6213	6654	0.441035	0.397483	3967	5968	1.85815	0.0006878	2495	12932	0.667261	0.747676	2173	3793	orf19.829 (SCH9)	SCH9	AGC family protein kinase and functional ortholog of mammalian S6 kinase; phosphorylated by Tor1p and required for TORC1-mediated regulation of ribosome biogenesis, translation initiation, and entry into G0 phase; involved in transactivation of osmostress-responsive genes; regulates G1 progression, cAPK activity and nitrogen activation of the FGM pathway; integrates nutrient signals and stress si…
CPAR2_702050		0.261507	0.992929	24	28	0.187793	0.955659	10	13	1.85662	0.0406574	14	72	-1.06187	0.745257	16	9	No C.albicans ortholog
CPAR2_703640		0.833848	5.6622e-05	41737	72445	1.50568	7.28545e-22	47333	150812	1.85602	5.73882e-08	46279	220324	0.688769	0.201359	18944	36305	orf19.1342 (SHM1)	SHM1	Mitochondrial serine hydroxymethyltransferase, converts serine to glycine plus 5,10 methylenetetrahydrofolate; involved in generating precursors for purine, pyrimidine, amino acid, and lipid biosynthesis; reverse reaction generates serine
CPAR2_801050		0.0634896	0.993547	6181	6323	-0.172348	0.817894	4386	4363	1.85194	0.00402886	3498	17306	-0.0482969	0.916126	17184	19239	orf19.2859 (SRP40)	SRP40	Nucleolar, serine-rich protein with a role in preribosome assembly or transport; may function as a chaperone of small nucleolar ribonucleoprotein particles (snoRNPs); immunologically and structurally to rat Nopp140
CPAR2_407480		-0.106843	0.992929	635	574	0.097896	0.844602	1106	1331	1.85122	1.22224e-07	628	3019	0.0521796	0.945355	647	773	orf19.1768
CPAR2_207190		-0.443871	0.247078	46801	33418	-1.66605	4.57281e-05	48141	17585	-1.85103	0.0686894	61339	23857	-0.0871619	0.850719	65335	71151	orf19.397	MRPL28	Mitochondrial ribosomal protein of the large subunit
CPAR2_104180		-0.0525855	0.993547	1694	1590	1.84903	1.32854e-07	2011	7981	1.84202	2.77607e-07	1205	5653	1.06694	0.0851852	809	1932	orf19.4110
CPAR2_805120		0.729324	0.244327	329	530	1.26567	0.141022	166	441	1.84821	0.00745424	70	364	0.528353	0.860215	44	69	orf19.5265 (KIP4)	SMY1	Protein that interacts with Myo2p, proposed to be involved in exocytosis; N-terminal domain is related to the motor domain of kinesins
CPAR2_300760		0.0986507	0.993547	8573	9024	0.26494	0.637833	6798	9173	1.84697	2.32195e-07	5372	26772	0.0810531	0.882185	10248	12512	No C.albicans ortholog
CPAR2_105600		-0.376125	0.00794287	8956	6722	-1.31015	1.1e-07	8992	4062	-1.84533	0.00245395	8655	3224	-0.348298	0.620615	17822	16742	orf19.760	RTC6	Protein involved translation; mutants have defects in biogenesis of nuclear ribosomes; sequence similar to prokaryotic ribosomal protein L36, may be a mitochondrial ribosomal protein encoded in the nucleus
CPAR2_303120		0.340037	0.405803	22879	28144	1.22443	8.74328e-13	5783	15118	1.84507	7.92401e-06	3965	19126	1.00218	0.00159354	3277	7494	orf19.4328 (CCC2)	CCC2	Cu(+2)-transporting P-type ATPase, required for export of copper from the cytosol into an extracytosolic compartment; has similarity to human proteins involved in Menkes and Wilsons diseases
CPAR2_102400		0.2539	0.984054	192	222	0.447959	0.644253	235	360	1.84501	0.000102443	177	832	0.361909	0.570126	332	499	No C.albicans ortholog
CPAR2_802070	HXT5	1.84466	0.00953123	483	1683	-0.205854	0.785698	415	407	-0.376633	0.512722	340	364	-0.0237456	0.967269	1066	1236	orf19.4384 (HXT5)
CPAR2_703170		-0.480853	0.159416	12276	8578	-0.365393	0.208986	12571	10905	1.84123	0.000182178	9109	41579	0.529883	0.27195	3357	5724	orf19.5505 (HIS7)	HIS7	Imidazole glycerol phosphate synthase (glutamine amidotransferase:cyclase), catalyzes the fifth step of histidine biosynthesis and also produces 5-aminoimidazole-4-carboxamide ribotide (AICAR), a purine precursor
CPAR2_806130		-0.477556	0.104035	4677	3274	0.544282	0.101494	5988	9793	1.84121	0.0016796	5036	22843	0.452874	0.169742	2808	4491	orf19.5877 (ATF1)
CPAR2_209900		0.0959285	0.992929	612	639	0.0253295	0.975541	860	993	1.84105	2.35824e-09	776	3748	0.035004	0.965115	974	1190	orf19.5212	CST9	SUMO E3 ligase; required for synaptonemal complex formation; localizes to synapsis initiation sites on meiotic chromosomes; potential Cdc28p substrate
CPAR2_400640		-0.0503644	0.992929	6330	5951	-0.30243	0.432681	7491	6764	-1.84043	0.000107003	5540	2094	0.226726	0.801556	1167	1546	orf19.4610
CPAR2_301880		1.51965	0.363855	350	960	-0.682511	NA	2156	1495	1.83994	2.08251e-09	451	2195	-0.274828	0.679111	870	841	orf19.5536	AMD2	Putative amidase
CPAR2_302470		-0.36923	0.765395	5240	3962	-1.12894	8.83703e-06	7586	3870	-1.83779	0.0135142	7106	2642	-0.318661	0.672746	7773	7410	orf19.2650.1	MRP10	Mitochondrial ribosomal protein of the small subunit; contains twin cysteine-x9-cysteine motifs
CPAR2_209620		0.00558474	0.999	7749	7601	0.156422	0.686874	10060	12784	1.8377	0.0213114	11041	53326	0.127723	0.780157	33467	42557	orf19.183 (HIS3)	HIS3	Imidazoleglycerol-phosphate dehydratase, catalyzes the sixth step in histidine biosynthesis; mutations cause histidine auxotrophy and sensitivity to Cu, Co, and Ni salts; transcription is regulated by general amino acid control via Gcn4p
CPAR2_405330		-0.555104	0.441304	106058	70433	-1.31929	0.000143469	67573	30389	-1.8367	0.00629106	62033	23049	-0.607367	0.382187	154675	120967	orf19.5982 (RPL18)	RPL18A	Protein component of the large (60S) ribosomal subunit, identical to Rpl18Bp and has similarity to rat L18 ribosomal protein; intron of RPL18A pre-mRNA forms stem-loop structures that are a target for Rnt1p cleavage leading to degradation
CPAR2_107590		0.472725	0.946353	197029	263759	-0.425897	0.145838	141900	120144	-1.83498	7.52283e-06	167334	62541	0.0719171	0.875299	42087	51212	orf19.410.3	RIB4	Lumazine synthase (6,7-dimethyl-8-ribityllumazine synthase, also known as DMRL synthase); catalyzes synthesis of immediate precursor to riboflavin
CPAR2_403710		0.457041	0.14349	1884	2517	0.432893	0.0604877	2100	3170	1.83328	6.4333e-07	1992	9263	0.834376	1.507e-05	3696	7707	No C.albicans ortholog
CPAR2_108100		-0.540675	0.685666	29780	20041	-0.589121	0.00559454	20797	15482	-1.83121	0.000314202	18607	7103	-0.522225	0.562545	25824	21601	orf19.51	CLU1	eIF3 component of unknown function; deletion causes defects in mitochondrial organization but not in growth or translation initiation, can rescue cytokinesis and mitochondrial organization defects of the Dictyostelium cluA- mutant
CPAR2_302160		-0.351375	0.893227	95958	73571	-1.58733	7.81787e-08	58130	21705	-1.83008	0.013899	51829	19232	-0.205586	0.695132	91949	93409	orf19.4660 (RPS6A)	RPS6A	Protein component of the small (40S) ribosomal subunit; identical to Rps6Bp and has similarity to rat S6 ribosomal protein
CPAR2_803400		-0.331686	0.881887	119323	92610	-1.42821	9.99077e-07	95520	39949	-1.82846	0.0152384	90153	33514	-0.407529	0.478318	264187	236329	orf19.6265.1 (RPS14B)	RPS14B	Ribosomal protein 59 of the small subunit, required for ribosome assembly and 20S pre-rRNA processing; mutations confer cryptopleurine resistance; nearly identical to Rps14Ap and similar to E. coli S11 and rat S14 ribosomal proteins
CPAR2_207010		0.474567	0.571018	2055	2791	0.374834	0.275952	2771	4051	1.82794	2.4161e-07	2131	10156	-0.59819	0.335978	7520	5949	orf19.6236	NOP6	rRNA-binding protein required for 40S ribosomal subunit biogenesis; contains an RNA recognition motif (RRM); hydrophilin essential to overcome the stress of the desiccation-rehydration process; NOP6 may be a fungal-specific gene as no homologs have been yet identified in higher eukaryotes
CPAR2_300230		-0.701947	0.338305	11602	6975	-1.13671	3.70454e-06	14291	7198	-1.826	0.00614851	13565	5261	0.242759	0.634496	10070	13895	orf19.7019 (YML6)	YML6	Mitochondrial ribosomal protein of the large subunit, has similarity to E. coli L4 ribosomal protein and human mitoribosomal MRP-L4 protein; essential for viability, unlike most other mitoribosomal proteins
CPAR2_503530		0.483658	0.927807	135	184	-1.82375	0.000100175	878	277	-0.449873	0.593	89	91	0.852347	0.634496	27	57	orf19.6993 (GAP2)	GAP1	General amino acid permease; Gap1p senses the presence of amino acid substrates to regulate localization to the plasma membrane when needed
CPAR2_201650		-0.221617	0.992929	9325	7746	-0.923686	4.00118e-05	16847	9900	-1.8236	1.22224e-07	17130	6394	-0.0517672	0.920805	8807	9812	orf19.6354
CPAR2_807160		0.14668	0.942411	2131	2298	0.0991818	0.881922	1696	2072	1.82218	0.000239502	1504	7170	-0.28363	0.604324	9806	9542	orf19.7366	YIL096C	Putative S-adenosylmethionine-dependent methyltransferase; associates with precursors of the 60S ribosomal subunit; predicted to be involved in ribosome biogenesis
CPAR2_107980		-0.350876	0.764355	1754	1344	0.438268	0.0513552	2003	3029	1.81965	0.00338421	1355	5989	0.60193	0.0622779	1208	2132	orf19.4061	YOR238W	Putative protein of unknown function; green fluorescent protein (GFP)-fusion protein localizes to the cytoplasm
CPAR2_109840	MET30	1.05917	5.76212e-09	5578	11339	1.57219	1.07854e-19	4532	15075	1.81906	1.22224e-07	4378	21383	0.111777	0.825119	3680	4612	orf19.3301	MET30	F-box protein containing five copies of the WD40 motif, controls cell cycle function, sulfur metabolism, and methionine biosynthesis as part of the ubiquitin ligase complex; interacts with and regulates Met4p, localizes within the nucleus
CPAR2_401520		0.0536187	0.994923	6523	6630	-0.405292	0.513965	4782	4067	1.81746	0.0161692	4180	20179	-0.0993082	0.840178	20199	21905	orf19.2688 (NAN1)	NAN1	U3 snoRNP protein, component of the small (ribosomal) subunit (SSU) processosome containing U3 snoRNA; required for the biogenesis of18S rRNA
CPAR2_209960		0.1762	0.86795	1569	1727	0.13878	0.822182	1592	1970	1.81709	0.00018103	1480	7159	-0.231013	0.629408	2841	2850	orf19.5206	SHQ1	Chaperone protein required for the assembly of box H/ACA snoRNPs and thus for pre-rRNA processing, forms a complex with Naf1p and interacts with H/ACA snoRNP components Nhp2p and Cbf5p; homology with known Hsp90p cochaperones
CPAR2_504120		-0.291175	0.82949	60938	48358	0.114025	0.816117	120361	143735	-1.81665	1.25051e-05	113719	41730	-0.130291	0.831918	26453	28282	orf19.5455	VTC1	Subunit of the vacuolar transporter chaperone (VTC) complex involved in membrane trafficking, vacuolar polyphosphate accumulation, microautophagy and non-autophagic vacuolar fusion; also has mRNA binding activity
CPAR2_106160		0.112915	0.992929	6718	7077	0.020547	0.977761	12808	14931	-1.81661	4.99045e-06	14222	5294	0.0426426	0.920886	2924	3515	orf19.3674 (GAL102)
CPAR2_202550		-0.319414	0.464391	96384	75070	-1.09001	5.37654e-05	67038	35690	-1.81421	0.000194786	73043	27588	-0.485328	0.486854	98337	82810	orf19.4375.1 (RPS30)	RPS30B	Protein component of the small (40S) ribosomal subunit; nearly identical to Rps30Ap and has similarity to rat S30 ribosomal protein
CPAR2_807560		-0.0661667	0.993547	217779	202148	-1.81214	1.08624e-08	196689	64091	-1.74552	NA	220390	89142	-0.223603	0.672746	680104	676230	orf19.5927 (RPS15)	RPS15	Protein component of the small (40S) ribosomal subunit; has similarity to E. coli S19 and rat S15 ribosomal proteins
CPAR2_300590		1.4787	0.0441232	2114	5774	0.544096	0.11374	1493	2398	1.81176	8.23238e-06	1099	5283	1.42054	2.0676e-08	968	2999	No C.albicans ortholog
CPAR2_801180		-0.00644945	0.999	3625	3538	-0.0695937	0.935194	2231	2400	1.81138	0.00152036	1590	7678	0.00811597	0.990107	6383	7427	orf19.2830 (RRP9)	RRP9	Protein involved in pre-rRNA processing, associated with U3 snRNP; component of small ribosomal subunit (SSU) processosome; ortholog of the human U3-55k protein
CPAR2_805910		1.00168	0.0222791	314	612	-0.712209	0.284823	294	199	1.81099	0.00726645	185	937	0.743572	0.469461	114	221	No C.albicans ortholog
CPAR2_108360		-0.873179	0.615622	1077	568	-1.00871	0.000199917	1159	641	-1.81074	9.59668e-06	1068	400	-0.128016	0.860215	1024	1096	No C.albicans ortholog
CPAR2_203450	FDH1	1.81023	0.000306298	2871	9758	0.967529	0.56455	17718	38673	0.0281847	NA	17985	26507	-0.0570064	0.923734	956	1090	orf19.638 (FDH1)	FDH1	NAD(+)-dependent formate dehydrogenase, may protect cells from exogenous formate
CPAR2_207790		0.230268	0.968946	3312	3763	0.431932	0.172373	12273	18774	-1.80519	0.00150326	14050	5254	-0.582557	0.505611	2505	2003	No C.albicans ortholog
CPAR2_403080		0.602591	0.651424	13919	20472	1.80506	5.56349e-24	9411	37247	-0.779821	0.29634	12208	9984	-0.71422	0.00349518	3181	2238	orf19.3794 (CSR1)	ZAP1	Zinc-regulated transcription factor; binds to zinc-responsive promoters to induce transcription of certain genes in presence of zinc, represses other genes in low zinc; regulates its own transcription; contains seven zinc-finger domains
CPAR2_601440		0.0877429	0.993547	2403	2506	-0.517983	0.392324	1870	1467	1.80449	0.0235609	985	4822	-0.0437106	0.962815	2293	2562	orf19.3477	PUS1	tRNA:pseudouridine synthase, introduces pseudouridines at positions 26-28, 34-36, 65, and 67 of tRNA; nuclear protein that appears to be involved in tRNA export; also acts on U2 snRNA
CPAR2_808660		0.314237	0.938532	8492	10321	0.232657	0.532262	24610	32783	-1.80347	0.000535767	34122	12991	0.0969697	0.882049	1512	1870	orf19.6816	YJR096W	Putative xylose and arabinose reductase; member of the aldo-keto reductase (AKR) family; GFP-fusion protein is induced in response to the DNA-damaging agent MMS
CPAR2_802080		-0.129531	0.992929	1909	1705	-0.151159	0.857074	1471	1495	1.80087	0.000208694	999	4756	-0.296398	0.430072	5859	5561	orf19.4401 (YVH1)	YVH1	Protein phosphatase involved in vegetative growth at low temperatures, sporulation, and glycogen accumulation; mutants are defective in 60S ribosome assembly; member of the dual-specificity family of protein phosphatases
CPAR2_301020		0.463647	0.813059	5913	7982	-0.627679	0.138371	3909	2824	1.80042	0.00379798	2044	9840	0.500504	0.578656	2860	4587	orf19.7053 (GAC1)	GAC1	Regulatory subunit for Glc7p type-1 protein phosphatase (PP1), tethers Glc7p to Gsy2p glycogen synthase, binds Hsf1p heat shock transcription factor, required for induction of some HSF-regulated genes under heat shock
CPAR2_405570		0.0624549	0.992929	219818	222656	-1.79815	4.16831e-07	184234	60773	-1.33002	NA	236494	128921	-0.435894	0.588141	1073440	928344	orf19.5964.2 (RPL35)	RPL35A	Protein component of the large (60S) ribosomal subunit, identical to Rpl35Bp and has similarity to rat L35 ribosomal protein
CPAR2_501020		0.160724	0.992929	537785	589786	-0.568322	0.0183648	1183697	893785	-1.79697	1.6301e-05	1097478	414081	0.443933	0.708733	9499	14835	orf19.2877 (PDC11)	PDC1	Major of three pyruvate decarboxylase isozymes, key enzyme in alcoholic fermentation, decarboxylates pyruvate to acetaldehyde; subject to glucose-, ethanol-, and autoregulation; involved in amino acid catabolism
CPAR2_601540		0.421374	0.747075	4744	6208	0.383336	0.615594	2935	4276	1.7968	0.00257499	1598	7947	0.0611877	0.940507	3133	3697	orf19.5612 (BMT4)
CPAR2_403510		0.212447	0.992929	89838	102037	-0.501112	0.0193866	120064	93858	-1.7968	9.4436e-05	104214	39958	0.357332	0.713324	10760	15489	orf19.1327 (RBT1)
CPAR2_600560		-0.00994653	0.999	4689	4552	-0.346153	0.61747	3755	3335	1.79444	0.00197254	2827	13321	-0.627546	0.231422	41279	32096	orf19.5550 (MRT4)	MRT4	Protein involved in mRNA turnover and ribosome assembly, localizes to the nucleolus
CPAR2_100180		0.0538676	0.993547	5697	5776	0.184166	0.714466	4580	5827	1.79409	2.15744e-05	3651	16979	-0.198296	0.681469	9190	9393	orf19.4029	SQT1	Essential protein involved in a late step of 60S ribosomal subunit assembly or modification; contains multiple WD repeats; interacts with Qsr1p in a two-hybrid assay
CPAR2_204710		-0.0525845	0.993547	54660	51410	-0.171539	0.649132	46032	45629	-1.79202	5.68615e-05	39171	15448	0.560564	3.78223e-05	10603	18235	orf19.2364 (MIS11)	MIS1	Mitochondrial C1-tetrahydrofolate synthase, involved in interconversion between different oxidation states of tetrahydrofolate (THF); provides activities of formyl-THF synthetase, methenyl-THF cyclohydrolase, and methylene-THF dehydrogenase
CPAR2_403280		-0.235385	0.961296	39766	32782	-0.584518	0.0238443	42180	31075	-1.79068	7.01459e-07	42304	16282	-0.51827	0.380807	63433	52270	orf19.2756	ERD2	HDEL receptor, an integral membrane protein that binds to the HDEL motif in proteins destined for retention in the endoplasmic reticulum; has a role in maintenance of normal levels of ER-resident proteins
CPAR2_601750		0.38532	0.958015	123	156	1.78879	4.98929e-12	277	1067	-0.725285	0.207252	266	215	0.273161	0.768165	189	263	orf19.690 (PLB2)
CPAR2_400980		-0.381361	0.806366	172766	129524	-1.50562	1.18977e-09	150070	59184	-1.78787	0.0105598	139959	54182	-0.252908	0.621888	222713	219170	orf19.4632 (RPL20B)	RPL20B	Protein component of the large (60S) ribosomal subunit, nearly identical to Rpl20Ap and has similarity to rat L18a ribosomal protein
CPAR2_405680		-0.45282	0.842247	154676	110574	-1.52221	6.67997e-07	132737	51659	-1.78295	0.0186796	118131	45567	-0.397064	0.552726	262159	236853	orf19.6975 (YST1)	RPS0A	Protein component of the small (40S) ribosomal subunit, nearly identical to Rps0Bp; required for maturation of 18S rRNA along with Rps0Bp; deletion of either RPS0 gene reduces growth rate, deletion of both genes is lethal
CPAR2_211700		0.125041	0.992929	11463	12099	-0.903268	1.35563e-05	7708	4565	-1.78273	2.66205e-05	6058	2274	-0.207126	0.80849	1586	1636	orf19.909.1
CPAR2_808530		0.146464	0.992929	63495	67868	-0.953111	0.00314611	68268	40179	-1.78239	0.00594415	73873	28854	-0.552713	0.486854	236362	189567	orf19.6828.1	SSS1	Subunit of the Sec61p translocation complex (Sec61p-Sss1p-Sbh1p) that forms a channel for passage of secretory proteins through the endoplasmic reticulum membrane, and of the Ssh1p complex (Ssh1p-Sbh2p-Sss1p); interacts with Ost4p and Wbp1p
CPAR2_208480		0.39039	0.210576	1524	1947	0.0768827	0.888827	1022	1205	1.78058	0.0112835	841	4083	-0.0562673	0.948304	2888	3239	orf19.5067	LRP1	Nuclear exosome-associated nucleic acid binding protein; involved in RNA processing, surveillance, degradation, tethering, and export; homolog of mammalian nuclear matrix protein C1D involved in regulation of DNA repair and recombination
CPAR2_105960		-0.405112	0.820855	90999	67201	-1.40187	6.07474e-07	81721	34608	-1.77632	0.0135286	74074	28766	-0.141388	0.776212	126637	133950	orf19.2994.1 (RPS16A)	RPS16A	Protein component of the small (40S) ribosomal subunit; identical to Rps16Bp and has similarity to E. coli S9 and rat S16 ribosomal proteins
CPAR2_403650		0.34297	0.680545	205	253	0.37103	0.395044	282	407	1.77396	5.58726e-07	219	1030	0.233205	0.776212	366	497	orf19.1307
CPAR2_303640		-0.28271	0.326168	24445	19547	-1.21789	2.26407e-07	21752	10613	-1.77373	0.0661805	25491	10298	-0.0631752	0.875299	24801	27508	orf19.3205	MRPL36	Mitochondrial ribosomal protein of the large subunit; overproduction suppresses mutations in the COX2 leader peptide-encoding region
CPAR2_204410		-0.265347	0.992929	98	80	-0.840221	0.247749	270	169	-1.77275	0.0116574	311	119	-0.210919	0.879179	117	116	orf19.6142	MND1	Protein required for recombination and meiotic nuclear division; forms a complex with Hop2p, which is involved in chromosome pairing and repair of meiotic double-strand breaks
CPAR2_206420		0.196202	0.979346	35871	39825	-0.514286	0.0475938	31803	25166	-1.76988	0.00430476	34720	13629	-0.376664	0.46979	111774	101451	orf19.3558	ERP3	Protein with similarity to Emp24p and Erv25p, member of the p24 family involved in ER to Golgi transport
CPAR2_203030		-0.0595488	0.993547	1404	1315	-0.676553	0.270329	785	551	1.76844	0.0290907	585	2810	-0.208463	0.74855	3621	3643	orf19.718 (RRN11)	RRN11	Component of the core factor (CF) rDNA transcription factor complex; CF is required for transcription of 35S rRNA genes by RNA polymerase I and is composed of Rrn6p, Rrn7p, and Rrn11p
CPAR2_400490		0.0359092	0.998689	43716	43298	-0.856097	0.0137014	33840	21416	-1.76779	0.0100482	46399	18664	-0.185139	0.79301	87804	88591	orf19.4600.1
CPAR2_209020		-0.600495	0.268021	6440	4151	-0.619597	0.000481507	5255	3821	-1.76709	0.0011718	4254	1725	0.179684	0.641888	3128	4116	orf19.6208 (MEF2)	MEF2	Mitochondrial elongation factor involved in translational elongation
CPAR2_601330		-0.49281	0.775773	167402	116292	-1.47631	2.17087e-07	127447	51263	-1.76701	0.019703	121371	47393	-0.595279	0.326432	137503	108462	orf19.3465 (RPL10A)	RPL1A	N-terminally acetylated protein component of the large (60S) ribosomal subunit, nearly identical to Rpl1Bp and has similarity to E. coli L1 and rat L10a ribosomal proteins; rpl1a rpl1b double null mutation is lethal
CPAR2_405210		-0.632053	0.0758496	23062	14523	-0.475832	0.0159142	25899	20820	-1.7665	8.5711e-07	24258	9416	-0.00536025	0.992281	11502	13237	orf19.4079 (SLP2)
CPAR2_211210		-0.0803757	0.992929	307953	282920	-1.76635	3.90549e-09	215499	72202	-1.44362	0.191283	249801	124688	-0.388253	0.455561	1067991	956855	orf19.840 (RPL21A)	RPL21A	Protein component of the large (60S) ribosomal subunit, nearly identical to Rpl21Bp and has similarity to rat L21 ribosomal protein
CPAR2_700610		0.156923	0.980219	270	293	0.930477	0.032164	373	813	1.76591	1.8777e-05	259	1228	0.00462257	0.997466	297	342	orf19.7225
CPAR2_602170		-0.418245	0.777887	8060	5897	-1.07145	1.0777e-09	7219	3832	-1.76454	0.00201493	6251	2531	-0.0657783	0.875299	3225	3599	orf19.688	MRPS18	Mitochondrial ribosomal protein of the small subunit; essential for viability, unlike most other mitoribosomal proteins
CPAR2_401300		0.182587	0.99233	11477	12608	0.435066	0.169178	8953	13652	-1.76348	0.000114425	8563	3373	0.279411	0.703835	2991	4341	orf19.4591 (CAT2)	CAT2	Carnitine acetyl-CoA transferase present in both mitochondria and peroxisomes, transfers activated acetyl groups to carnitine to form acetylcarnitine which can be shuttled across membranes
CPAR2_207870		0.139159	0.99233	16422	17647	0.412987	0.250389	156753	236523	-1.75998	0.0452708	249172	92500	0.116803	0.92464	2143	2746	orf19.670.2
CPAR2_104800		-0.417457	0.558455	5119	3743	-0.601173	0.000103671	7290	5381	-1.75792	0.000458138	7027	2826	-0.415233	0.56421	6445	5681	orf19.5483	GUF1	Mitochondrial matrix GTPase that associates with mitochondrial ribosomes; important for translation under temperature and nutrient stress; may have a role in translational fidelity; similar to bacterial LepA elongation factor
CPAR2_808080		0.0835329	0.993547	3809	3949	-0.210657	0.795004	2354	2306	1.75682	0.0256603	2010	9548	-0.0867329	0.889692	12715	13931	orf19.6710 (UTP9)	UTP9	Nucleolar protein, component of the small subunit (SSU) processome containing the U3 snoRNA that is involved in processing of pre-18S rRNA
CPAR2_403150		-0.154969	0.972354	740	647	-0.351367	0.308976	1725	1514	1.75593	0.0108585	1928	8256	0.343738	0.556083	875	1284	orf19.6864
CPAR2_213320		0.00643199	0.999	2662	2617	0.203029	0.678514	1770	2277	1.75354	1.10492e-07	1361	6153	-0.0590946	0.898481	4746	5286	orf19.2090	ECM16	Essential DEAH-box ATP-dependent RNA helicase specific to the U3 snoRNP, predominantly nucleolar in distribution, required for 18S rRNA synthesis
CPAR2_303170		0.201029	0.754335	874	978	-0.0972138	0.836715	1345	1420	1.75119	4.09837e-07	1118	4948	-0.134186	0.772993	2433	2567	orf19.4323	YPT35	Endosomal protein of unknown function that contains a phox (PX) homology domain and binds to both phosphatidylinositol-3-phosphate (PtdIns(3)P) and proteins involved in ER-Golgi or vesicular transport
CPAR2_703790		-0.109704	0.992929	3828	3463	0.0180214	0.975206	3334	3789	1.74995	0.000368187	3666	16512	0.573617	0.0433273	1560	2698	orf19.6689 (ARG4)	ARG4	Argininosuccinate lyase, catalyzes the final step in the arginine biosynthesis pathway
CPAR2_200490		0.639571	0.152923	39877	60301	1.74714	1.25858e-11	37285	140841	-1.08573	0.0272866	45118	28606	-0.805056	0.21355	94929	65391	orf19.7611 (TRX1)	TRX1	Cytoplasmic thioredoxin isoenzyme of the thioredoxin system which protects cells against oxidative and reductive stress, forms LMA1 complex with Pbi2p, acts as a cofactor for Tsa1p, required for ER-Golgi transport and vacuole inheritance
CPAR2_407240		-0.397564	0.31216	593	438	-0.00926996	0.988589	802	890	1.74701	4.02939e-05	741	3371	-0.0486177	0.918513	1996	2263	No C.albicans ortholog
CPAR2_500090		-0.24033	0.783801	314190	258328	-1.54015	4.66341e-18	244667	94319	-1.74562	0.0133422	258848	103064	-0.536296	0.463939	624694	509651	orf19.3087 (UBI3)	RPS31	Fusion protein that is cleaved to yield a ribosomal protein of the small (40S) subunit and ubiquitin; ubiquitin may facilitate assembly of the ribosomal protein into ribosomes; interacts genetically with translation factor eIF2B
CPAR2_401230		0.126851	0.993547	125947	135213	-0.778746	0.0052515	171661	112188	-1.74457	4.60322e-07	155192	61023	-0.0525611	0.878146	44024	49391	orf19.4618 (FBA1)	FBA1	Fructose 1,6-bisphosphate aldolase, required for glycolysis and gluconeogenesis; catalyzes conversion of fructose 1,6 bisphosphate to glyceraldehyde-3-P and dihydroxyacetone-P; locates to mitochondrial outer surface upon oxidative stress
CPAR2_300290		-0.590763	0.0598006	8704	5641	-0.67285	0.00144591	9643	6747	-1.74402	1.4428e-05	9851	3987	-0.235855	0.681769	7641	7623	orf19.7012	MRPS16	Mitochondrial ribosomal protein of the small subunit
CPAR2_206140		0.0777823	0.992929	10757	11025	-0.931383	1.8513e-05	18585	11038	-1.74389	0.000920119	21372	8485	-0.428279	0.499924	30902	27229	orf19.6623	ELF1	Transcription elongation factor that contains a conserved zinc finger domain; implicated in the maintenance of proper chromatin structure in actively transcribed regions; deletion inhibits Brome mosaic virus (BMV) gene expression
CPAR2_405750		0.871909	0.910599	1193	2156	-1.74379	0.00315265	956	317	1.71328	1.62938e-06	325	1482	0.129743	0.860215	704	916	orf19.6983
CPAR2_104150		0.824889	0.258778	981	1684	1.08865	0.0036833	695	1664	1.74367	0.000451213	767	3547	-0.446238	0.457438	2738	2397	orf19.540
CPAR2_603160		-0.41778	0.28797	9532	6960	-0.841752	9.51756e-06	11197	7001	-1.74228	0.000528111	9353	3802	0.00851053	0.986075	3685	4319	orf19.109	MSY1	Mitochondrial tyrosyl-tRNA synthetase
CPAR2_700690		0.139814	0.984943	6059	6476	1.74125	6.74144e-29	4536	16938	-0.469661	0.177426	3991	3840	-0.237791	0.634496	5845	5879	orf19.5220	REX4	Putative RNA exonuclease possibly involved in pre-rRNA processing and ribosome assembly
CPAR2_600090		0.220954	0.528338	1665	1888	1.21754	4.15555e-13	1568	4088	1.74087	3.5733e-07	1123	5078	0.251862	0.705513	994	1381	orf19.5770 (OPT8)	YGL114W	Putative protein of unknown function; predicted member of the oligopeptide transporter (OPT) family of membrane transporters
CPAR2_806260		0.0486056	0.993547	5624	5654	-0.590244	0.00558043	6998	5173	-1.74045	2.31088e-08	6710	2653	-0.0981692	0.825119	2826	3090	orf19.1605 (PMS1)	PMS1	ATP-binding protein required for mismatch repair in mitosis and meiosis; functions as a heterodimer with Mlh1p, binds double- and single-stranded DNA via its N-terminal domain, similar to E. coli MutL
CPAR2_104195		-0.214656	0.983519	4868	4069	-0.489691	0.0300049	7743	6204	-1.74004	6.13244e-05	9413	3772	-0.133249	0.804604	6299	6762	orf19.2191.1
CPAR2_600020		0.458178	0.52022	6257	8393	0.34668	0.134677	4702	6647	1.73599	9.19318e-08	4169	19128	0.0653717	0.926475	8385	9985	No C.albicans ortholog
CPAR2_212350		-0.663518	0.831125	39	24	1.31283	0.207861	28	76	1.73401	0.0187404	26	118	-0.48308	0.64349	130	109	No C.albicans ortholog
CPAR2_104620		0.151537	0.980219	1634	1770	0.352611	0.448885	1113	1602	1.73364	0.00327162	1065	5131	-0.614836	0.00074593	6809	5174	orf19.24 (RTA2)	RSB1	Suppressor of sphingoid long chain base (LCB) sensitivity of an LCB-lyase mutation; putative integral membrane transporter or flippase that may transport LCBs from the cytoplasmic side toward the extracytoplasmic side of the membrane
CPAR2_500290		-0.579477	0.000228327	15818	10310	-0.37582	0.313092	19082	16430	-1.73125	2.484e-05	16642	6927	0.339293	0.68869	6528	9341	orf19.1795 (PUF3)	PUF3	Protein of the mitochondrial outer surface, links the Arp2/3 complex with the mitochore during anterograde mitochondrial movement; also binds to and promotes degradation of mRNAs for select nuclear-encoded mitochondrial proteins
CPAR2_109850		0.138477	0.992929	7133	7702	0.078758	0.914641	7495	8910	1.73065	0.000285923	6645	29850	-0.365612	0.426159	27318	25013	orf19.3300 (ZPR1)	ZPR1	Essential protein with two zinc fingers, present in the nucleus of growing cells but relocates to the cytoplasm in starved cells via a process mediated by Cpr1p; binds to translation elongation factor eEF-1 (Tef1p)
CPAR2_404560		-0.0259491	0.993547	2465	2360	0.735646	3.55508e-05	1573	2946	1.73064	0.000543984	1113	5289	-0.0743609	0.878146	3272	3608	orf19.5924 (ZCF31)
CPAR2_704010		-0.337279	0.0543252	38493	29638	-0.588866	0.0035431	23010	17071	-1.72935	1.12425e-06	17077	6941	-0.0957934	0.836185	19715	21352	orf19.5171 (PMT1)	PMT1	Protein O-mannosyltransferase, transfers mannose from dolichyl phosphate-D-mannose to protein Ser/Thr residues; 1 of 7 related proteins involved in O-glycosylation which is essential for cell wall rigidity; involved in ER quality control
CPAR2_105820		-0.0213443	0.998689	6527	6268	-0.587468	0.000254604	8143	6065	-1.72929	4.23164e-07	7692	3090	-0.0250165	0.951029	5515	6361	orf19.6062	MGR2	Subunit of the TIM23 translocase complex; acts to couple Tim21p with the core Tim23 translocase; absolutely required for mitochondrial import of presequence-containing proteins at elevated temperature; required for viability of cells lacking the mitochondrial genome (petite-negative phenotype)
CPAR2_200380		0.160627	0.992929	3771	4134	-0.36679	0.577133	2475	2161	1.72791	0.00890239	1804	8317	-0.0976061	0.825119	9046	9808	orf19.7624	BFR2	Essential protein that is a component of 90S preribosomes; may be involved in rRNA processing; multicopy suppressor of sensitivity to Brefeldin A; expression is induced during lag phase and also by cold shock
CPAR2_701860		-0.160233	0.921616	11133	9690	-0.4013	0.184378	7437	6287	-1.72773	6.78004e-08	6764	2677	-0.39164	0.314731	6822	6129	orf19.6293 (EMP24)	EMP24	Component of the p24 complex; binds to GPI anchor proteins and mediates their efficient transport from the ER to the Golgi; integral membrane protein that associates with endoplasmic reticulum-derived COPII-coated vesicles
CPAR2_502390		-0.43656	0.764192	8404	6073	-0.964113	1.71304e-07	6848	3914	-1.72685	0.0132353	6000	2494	0.381853	0.573898	4381	6516	orf19.5698	MRPL1	Mitochondrial ribosomal protein of the large subunit
CPAR2_503800		0.47792	0.826376	14035	18911	1.72376	0.0378182	11218	41539	0.412632	0.593006	9386	16981	-0.287161	0.719906	55512	54071	orf19.1709
CPAR2_100100		0.463181	0.789085	2861	3847	1.41861	0.00244022	4261	12887	1.72371	0.0051298	2487	11217	-0.091896	0.893814	1930	2101	orf19.4041 (PEX4)	PEX4	Peroxisomal ubiquitin conjugating enzyme required for peroxisomal matrix protein import and peroxisome biogenesis
CPAR2_702860		-0.14673	0.988023	2134	1871	0.0943107	0.836394	1817	2178	1.72319	2.16597e-05	1418	6060	0.653941	0.324019	794	1475	orf19.7157
CPAR2_209450		-0.230144	0.645965	568500	471276	-1.42974	6.50356e-08	489528	207919	-1.72256	0.00283056	565657	228326	0.0769625	0.904385	460429	551114	orf19.6882.1	RPL33A	N-terminally acetylated ribosomal protein L37 of the large (60S) ribosomal subunit, nearly identical to Rpl33Bp and has similarity to rat L35a; rpl33a null mutant exhibits slow growth while rpl33a rpl33b double null mutant is inviable
CPAR2_400890		-0.00680663	0.999	2360	2290	0.883989	6.65896e-05	2991	6169	1.72184	1.46735e-08	2714	11951	0.0444085	0.935348	2127	2558	No C.albicans ortholog
CPAR2_808670		0.324916	0.901785	414027	507259	-0.27134	0.450557	612673	569084	-1.72074	8.07227e-06	553701	220936	-0.0312309	0.951968	81912	92699	orf19.6814 (TDH3)	TDH3	Glyceraldehyde-3-phosphate dehydrogenase, isozyme 3, involved in glycolysis and gluconeogenesis; tetramer that catalyzes the reaction of glyceraldehyde-3-phosphate to 1,3 bis-phosphoglycerate; detected in the cytoplasm and cell wall
CPAR2_200670		-0.252458	0.910599	1907	1553	-1.18299	2.16792e-07	2076	1017	-1.72002	6.05623e-05	1600	658	-0.263504	0.672746	2647	2565	orf19.7588	RRG7	Protein of unknown function; green fluorescent protein (GFP)-fusion protein localizes to the mitochondrion; deletion confers sensitivity to 4-(N-(S-glutathionylacetyl)amino) phenylarsenoxide (GSAO); YOR305W is not an essential gene
CPAR2_109810		-0.0121722	0.999	3213	3113	-0.477876	0.329204	1840	1486	1.71958	0.0140384	1596	7191	-0.00772021	0.993107	5030	5786	orf19.3303	PPM2	AdoMet-dependent tRNA methyltransferase also involved in methoxycarbonylation; required for the synthesis of wybutosine (yW), a modified guanosine found at the 3'-position adjacent to the anticodon of phe-tRNA; similarity to Ppm1p
CPAR2_402190		-0.561487	0.166748	12635	8322	-0.664224	1.07446e-06	15393	10880	-1.71846	1.85675e-05	14755	5994	-0.392572	0.527734	19458	17508	orf19.5648
CPAR2_208880		-0.282154	0.972354	5244	4225	-0.222954	0.327006	13016	12457	-1.71745	1.39983e-06	14251	5641	-0.190126	0.776764	5295	5407	orf19.6225.1	PET117	Protein required for assembly of cytochrome c oxidase
CPAR2_401390		-0.48869	0.351168	5011	3468	-0.655736	0.00256669	4974	3549	-1.71702	5.68224e-06	4830	1981	-0.444184	0.543505	9464	8285	orf19.4676	MDM35	Mitochondrial intermembrane space protein; mutation affects mitochondrial distribution and morphology; contains twin cysteine-x9-cysteine motifs
CPAR2_209570		0.126006	0.980219	2854	3036	-0.239592	0.444585	2490	2364	1.71686	0.000183867	2066	9180	-0.143651	0.765295	7423	7880	orf19.4125	PZF1	Transcription factor IIIA (TFIIIA); essential DNA binding protein required for transcription of 5S rRNA by RNA polymerase III; not involved in transcription of other RNAP III genes; nine conserved zinc fingers; may also bind 5S rRNA
CPAR2_805900	STP1	1.01566	1.061e-06	7483	14765	0.604802	0.00883623	5982	10175	1.71555	0.00449083	4606	21581	0.697373	0.166734	1563	2882	orf19.5917 (STP3)
CPAR2_602160		-0.312032	0.869408	116528	91612	-1.29085	1.29061e-06	66983	30617	-1.71307	0.00852968	63901	26049	-0.512529	0.432806	71293	59503	orf19.687.1 (RPL25)	RPL25	Primary rRNA-binding ribosomal protein component of the large (60S) ribosomal subunit, has similarity to E. coli L23 and rat L23a ribosomal proteins; binds to 25S rRNA via a conserved C-terminal motif
CPAR2_702400		0.323957	0.893227	100152	121367	-1.20391	0.000323116	143960	71183	-1.71012	0.0177047	172918	71622	-0.625586	0.33723	121675	92698	orf19.7043.1 (ACB1)	ACB1	Acyl-CoA-binding protein, transports newly synthesized acyl-CoA esters from fatty acid synthetase (Fas1p-Fas2p) to acyl-CoA-consuming processes; subject to starvation-induced, Grh1p-mediated unconventional secretion
CPAR2_704230		-0.497007	0.528338	7677	5313	-0.885816	3.63939e-05	5596	3378	-1.70975	0.000425987	5213	2150	-0.499164	0.372343	8062	6825	orf19.5161	MRPL49	Mitochondrial ribosomal protein of the large subunit
CPAR2_806760		0.140455	0.992929	2262	2449	0.616357	0.0252302	3458	5961	1.70901	4.14221e-08	2797	12052	-0.110448	0.738006	5488	5908	orf19.7387 (ELP3)	ELP3	Subunit of Elongator complex, which is required for modification of wobble nucleosides in tRNA; exhibits histone acetyltransferase activity that is directed to histones H3 and H4; disruption confers resistance to K. lactis zymotoxin
CPAR2_601690		0.105895	0.99233	5080	5312	-1.10721	1.78153e-07	10235	5382	-1.70778	0.0157997	13020	5467	-0.151647	0.772993	7921	8203	orf19.5523
CPAR2_807310		-0.363449	0.342879	24495	18558	-0.418175	0.017123	16244	13619	-1.70759	7.21568e-05	16851	7214	0.370696	0.499924	6705	10056	orf19.6007
CPAR2_103580		-0.50544	0.518645	8160	5618	-0.665536	5.38165e-05	6772	4800	-1.70435	0.0011744	6359	2676	0.0207829	0.958486	8461	9927	orf19.2214	MRPL7	Mitochondrial ribosomal protein of the large subunit; MRPL7 produces both YmL5 and YmL7, which are two different modified forms of the same protein
CPAR2_805140		0.724096	0.0385059	607	974	1.7042	1.28311e-12	379	1388	1.42007	0.00594415	299	1125	0.410845	0.693037	277	427	No C.albicans ortholog
CPAR2_600870		0.262122	0.921822	2474	2877	0.827985	0.644678	4633	9183	1.70369	6.81577e-05	1345	5961	0.750999	2.86012e-05	1705	3356	orf19.5728
CPAR2_407000		0.573438	0.465986	697	1006	-1.70352	6.50044e-05	464	158	-1.42896	0.116953	352	184	0.125963	0.868566	581	743	orf19.1351
CPAR2_403810		0.301027	0.888314	4216	5080	1.7032	4.07708e-17	3564	13070	1.1581	0.00743264	3510	10734	-0.0676628	0.867636	8456	9347	orf19.5038	TRM3	2'-O-ribose methyltransferase, catalyzes the ribose methylation of the guanosine nucleotide at position 18 of tRNAs
CPAR2_109180		-0.0133733	0.999	1607	1565	-0.197342	0.835449	1917	1882	1.70311	0.010299	1515	6855	-0.303732	0.505611	6376	6050	orf19.3327 (TRM2)	TRM2	tRNA methyltransferase, 5-methylates the uridine residue at position 54 of tRNAs and may also have a role in tRNA stabilization or maturation; endo-exonuclease with a role in DNA repair
CPAR2_808820		-0.19588	0.992929	3773	3231	-1.14843	7.96005e-09	11854	5943	-1.703	1.50145e-05	10819	4365	0.0548047	0.91192	1411	1699	orf19.6800 (POS5)	POS5	Mitochondrial NADH kinase, phosphorylates NADH; also phosphorylates NAD(+) with lower specificity; required for the response to oxidative stress
CPAR2_101400		0.0604313	0.992929	564	573	0.403466	0.31588	620	923	1.70229	0.000446193	590	2510	0.13993	0.825119	704	903	orf19.4015 (CAG1)	GPA1	GTP-binding alpha subunit of the heterotrimeric G protein that couples to pheromone receptors; negatively regulates the mating pathway by sequestering G(beta)gamma and by triggering an adaptive response; activates Vps34p at the endosome
CPAR2_209240		-0.084116	0.993547	73282	67804	-1.05439	0.000353866	86033	46247	-1.70088	0.00416249	68642	27766	-0.210776	0.672746	21736	21773	orf19.3575 (CDC19)	CDC19	Pyruvate kinase, functions as a homotetramer in glycolysis to convert phosphoenolpyruvate to pyruvate, the input for aerobic (TCA cycle) or anaerobic (glucose fermentation) respiration
CPAR2_405390		0.0974983	0.993547	5310	5566	0.123267	0.880815	3225	3987	1.70034	0.00414073	2718	12261	-0.324522	0.588141	14671	13711	orf19.5991	DBP10	Putative ATP-dependent RNA helicase of the DEAD-box protein family, constituent of 66S pre-ribosomal particles; essential protein involved in ribosome biogenesis
CPAR2_301040		-0.208186	0.911858	18640	15756	0.388438	0.0366388	16992	24964	1.69916	0.00235893	13229	54956	0.268615	0.621562	10616	14705	orf19.7064 (GLN4)	GLN4	Glutamine tRNA synthetase, monomeric class I tRNA synthetase that catalyzes the specific glutaminylation of tRNA(Glu); N-terminal domain proposed to be involved in enzyme-tRNA interactions
CPAR2_406360		-0.0645664	0.993547	1329	1245	-0.123184	0.866988	1179	1224	1.69877	0.00261733	1138	4970	-0.251191	0.634496	3530	3518	orf19.1886 (RCL1)	RCL1	Endonuclease that cleaves pre-rRNA at site A2 for 18S rRNA biogenesis; subunit of U3-containing 90S preribosome processome complex involved in small ribosomal subunit assembly; stimulates Bms1p GTPase and U3 binding activity; similar to RNA cyclase-like proteins but no cyclase activity detected
CPAR2_600750	SNQ2	1.46343	3.6672e-06	11266	30301	1.69743	4.57033e-23	8884	32195	1.07778	0.00361657	7967	22080	1.24627	9.90441e-13	11247	31379	orf19.5759 (SNQ2)	SNQ2	Plasma membrane ATP-binding cassette (ABC) transporter, multidrug transporter involved in multidrug resistance and resistance to singlet oxygen species
CPAR2_700350		-0.0210144	0.999	4237	4099	-0.139942	0.867306	3502	3583	1.69675	0.0012267	3172	13939	-0.538225	0.381338	15747	12971	orf19.7215	UTP10	Nucleolar protein, component of the small subunit (SSU) processome containing the U3 snoRNA that is involved in processing of pre-18S rRNA; mutant has increased aneuploidy tolerance
CPAR2_107440		0.271939	0.980219	34846	40683	-0.583841	0.115898	33451	25548	-1.69615	0.0042295	44941	18461	-0.236959	0.671469	53958	53601	orf19.2483 (RIM1)	RIM1	Single-stranded DNA-binding protein essential for mitochondrial genome maintenance; involved in mitochondrial DNA replication
CPAR2_800850		-0.0154026	0.999	14960	14509	-0.250186	0.133846	59100	55795	-1.69359	4.56288e-05	68496	27889	-0.387479	0.478318	35449	31653	orf19.2570 (MCI4)
CPAR2_101310		-0.146072	0.804138	4380	3851	-0.216782	0.525294	4830	4609	-1.69176	4.60047e-08	3906	1624	0.035082	0.963942	712	866	orf19.4287
CPAR2_400340		0.374457	0.570536	4409	5569	0.294787	0.633671	2370	3304	1.69005	0.0220239	2558	11349	-0.410432	0.437244	14221	12618	orf19.2712 (HCA4)	HCA4	Putative nucleolar DEAD box RNA helicase; high-copy number suppression of a U14 snoRNA processing mutant suggests an involvement in 18S rRNA synthesis
CPAR2_603750		-0.131596	0.992929	25994	23061	-0.496264	0.0844885	45256	35434	-1.68763	1.4794e-09	46346	19125	0.0503456	0.920805	13617	16393	orf19.120
CPAR2_105780		-0.426825	0.82653	144708	104316	-0.595771	0.00296012	243081	181197	-1.68689	6.29897e-05	263091	107453	-0.123206	0.851522	83644	89084	orf19.6058 (GLO1)	GLO1	Monomeric glyoxalase I, catalyzes the detoxification of methylglyoxal (a by-product of glycolysis) via condensation with glutathione to produce S-D-lactoylglutathione; expression regulated by methylglyoxal levels and osmotic stress
CPAR2_405030		0.207761	0.477654	8217	9236	0.334472	0.0757858	8104	11494	1.68403	0.000144376	7116	29728	0.501255	0.12754	4993	8222	orf19.1623 (CAP1)	YAP1	Basic leucine zipper (bZIP) transcription factor required for oxidative stress tolerance; activated by H2O2 through the multistep formation of disulfide bonds and transit from the cytoplasm to the nucleus; mediates resistance to cadmium
CPAR2_108220		0.242562	0.972354	335	387	1.00821	0.000469037	1666	3789	1.68264	0.017107	1723	7044	0.440399	0.634496	349	562	No C.albicans ortholog
CPAR2_703870		-0.376617	0.455158	20601	15483	-0.725113	6.12656e-05	20323	13698	-1.68248	0.00141754	18348	7792	-0.293071	0.539923	7620	7330	orf19.6693	YOL098C	Putative metalloprotease
CPAR2_602580		-0.162794	0.983519	144717	125869	-1.6794	6.45981e-11	114388	40237	-1.68126	0.0534449	121970	50757	-0.55388	0.248472	207956	167789	orf19.3415.1 (RPL32)	RPL32	Protein component of the large (60S) ribosomal subunit, has similarity to rat L32 ribosomal protein; overexpression disrupts telomeric silencing
CPAR2_101810		0.145428	0.748807	3715	4003	1.68093	5.02566e-23	4335	15594	0.215345	0.710824	4666	7070	0.0280175	0.953398	3767	4489	orf19.6167 (AYR1)	AYR1	NADPH-dependent 1-acyl dihydroxyacetone phosphate reductase found in lipid particles, ER, and mitochondrial outer membrane; involved in phosphatidic acid biosynthesis; required for spore germination; capable of metabolizing steroid hormones
CPAR2_105390		0.756872	0.000272796	4691	7714	1.68092	9.32242e-27	3575	12864	0.276974	0.409898	3933	6454	0.193699	0.749468	3153	4111	orf19.782	LDH1	Serine hydrolase; exhibits active esterase plus weak triacylglycerol lipase activities; proposed role in lipid homeostasis, regulating phospholipid and non-polar lipid levels and required for mobilization of LD-stored lipids; localizes to the lipid droplet (LD) surface; contains a classical serine containing catalytic triad (GxSxG motif)
CPAR2_804690		0.116094	0.992929	3889	4125	-0.281573	0.659922	2223	2064	1.6807	0.0128003	1494	6646	0.00810113	0.992281	6957	8055	orf19.5106 (DIP2)	DIP2	Nucleolar protein, specifically associated with the U3 snoRNA, part of the large ribonucleoprotein complex known as the small subunit (SSU) processome, required for 18S rRNA biogenesis, part of the active pre-rRNA processing complex
CPAR2_209010		0.144759	0.747075	4099	4411	0.372063	0.115476	4544	6515	1.67973	1.63261e-06	3456	14639	0.162119	0.754249	6571	8706	orf19.6209	MCH2	Protein with similarity to mammalian monocarboxylate permeases, which are involved in transport of monocarboxylic acids across the plasma membrane; mutant is not deficient in monocarboxylate transport
CPAR2_105970		-0.239601	0.972354	244559	202391	-1.46684	3.54776e-14	149009	60426	-1.67906	0.0144436	136989	57203	-0.213332	0.634366	245098	247259	orf19.2994 (RPL13)	RPL13A	Protein component of the large (60S) ribosomal subunit, nearly identical to Rpl13Bp; not essential for viability; has similarity to rat L13 ribosomal protein
CPAR2_300780		0.744494	2.41248e-08	13902	22680	1.67901	1.91083e-13	17398	62544	-0.264833	0.729935	16251	17411	0.0902231	0.848576	7624	9500	orf19.7149	ROY1	GTPase inhibitor with similarity to F-box proteins; inhibits Ypt52p GTPase activity by preventing Ypt52p from binding GTP; involved in regulating intracellular trafficking; physically interacts with Skp1p
CPAR2_804960		1.07838	0.881887	29	59	1.67744	0.0246725	33	119	-0.928145	0.471438	58	43	1.30742	0.708008	7	21	No C.albicans ortholog
CPAR2_800220		0.300449	0.799589	28560	34334	-0.200405	0.513605	42708	41551	-1.67718	2.70214e-09	42261	17456	0.134025	0.704677	6084	7774	orf19.2841 (PGM2)	PGM2	Phosphoglucomutase, catalyzes the conversion from glucose-1-phosphate to glucose-6-phosphate, which is a key step in hexose metabolism; functions as the acceptor for a Glc-phosphotransferase
CPAR2_800080		0.0463241	0.992929	3096	3115	1.67669	2.21122e-31	2873	10292	0.0700716	0.91916	2476	3533	0.160709	0.716311	1190	1549	orf19.7521 (REP1)
CPAR2_400030		-0.274667	0.93737	4718	3785	0.455292	0.0835059	3889	5940	1.67353	1.86268e-06	3155	13251	0.0356022	0.946795	4534	5442	orf19.4698 (PTC8)
CPAR2_702700		0.0566932	0.993547	16089	16207	-1.67268	3.69104e-22	14373	5082	0.251998	0.742137	14107	23351	-0.485896	0.499924	35108	28783	No C.albicans ortholog
CPAR2_801870		-0.52959	0.888277	19158	13042	-0.954862	1.04983e-07	27672	15891	-1.67189	0.00600526	24385	10310	-0.0284623	0.940331	18855	21679	orf19.4932	MEF1	Mitochondrial elongation factor involved in translational elongation
CPAR2_103320		1.17937	0.0443361	91	200	-0.56688	0.388823	211	159	1.66937	1.67303e-05	120	514	-0.0275402	0.986877	79	92	No C.albicans ortholog
CPAR2_301920		0.0398991	0.993547	2136	2139	-0.0218183	0.969571	2246	2491	1.66737	0.00100941	1860	7918	-0.226674	0.604014	11327	11419	orf19.2676	IKI1	Subunit of hexameric RecA-like ATPase Elp456 Elongator subcomplex; which is required for modification of wobble nucleosides in tRNA; iki1 mutations confer resistance to the K. lactis toxin zymocin
CPAR2_212880		0.0229953	0.993547	7170	7083	-0.0101787	0.986365	8280	9250	1.66733	0.000144373	8460	35790	-0.539205	0.422078	56445	46253	orf19.2028 (MXR1)	MXR1	Methionine-S-sulfoxide reductase, involved in the response to oxidative stress; protects iron-sulfur clusters from oxidative inactivation along with MXR2; involved in the regulation of lifespan
CPAR2_109630		-0.170626	0.992929	153549	133170	-1.66513	3.47979e-17	113349	40073	-1.29324	NA	108367	58608	-0.269481	0.527734	684986	669923	orf19.6085 (RPL16A)	RPL16A	N-terminally acetylated protein component of the large (60S) ribosomal subunit, binds to 5.8 S rRNA; has similarity to Rpl16Bp, E. coli L13 and rat L13a ribosomal proteins; transcriptionally regulated by Rap1p
CPAR2_803760		0.425882	0.680352	6705	8804	1.66506	2.0178e-17	9364	33444	0.639759	0.211493	8670	17665	0.235883	0.616163	2745	3735	orf19.7479 (NTH1)	NTH1	Neutral trehalase, degrades trehalose; required for thermotolerance and may mediate resistance to other cellular stresses; may be phosphorylated by Cdc28p
CPAR2_301400		0.74822	0.383317	26808	43663	0.88476	3.01281e-06	25793	53165	-1.66222	6.57272e-05	27980	12232	0.57809	0.119364	1446	2516	orf19.7021 (GPH1)	GPH1	Non-essential glycogen phosphorylase required for the mobilization of glycogen, activity is regulated by cyclic AMP-mediated phosphorylation, expression is regulated by stress-response elements and by the HOG MAP kinase pathway
CPAR2_202200		-0.361248	0.839183	16011	12193	-0.745968	0.000113107	12770	8544	-1.6601	0.0107614	11299	4885	0.139272	0.675975	9838	12598	orf19.498	NAM9	Mitochondrial ribosomal component of the small subunit
CPAR2_503980		0.0622434	0.993547	4270	4371	-0.432593	0.387696	3614	2999	1.65857	0.021759	2653	11688	-0.103206	0.857556	10908	11848	orf19.5436 (UTP8)	UTP8	Nucleolar protein required for export of tRNAs from the nucleus; also copurifies with the small subunit (SSU) processome containing the U3 snoRNA that is involved in processing of pre-18S rRNA
CPAR2_107450		-0.075936	0.994351	158	145	1.05359	0.00827819	613	1459	1.65626	0.0103611	657	2695	-0.235082	0.825119	576	573	orf19.2481
CPAR2_404080		0.148882	0.992929	845	915	-0.0746531	0.908389	586	625	1.65577	0.0011792	395	1760	-0.0025391	0.997466	393	456	orf19.5860
CPAR2_601100		0.2578	0.958015	4379	5122	-0.285312	0.628146	2774	2569	1.65568	0.0166472	2090	9296	-0.134512	0.802004	3489	3688	orf19.1091	NOP8	Nucleolar protein required for 60S ribosomal subunit biogenesis
CPAR2_300990		-0.353295	0.82653	17021	13027	-0.751096	0.000211494	18056	11920	-1.65522	0.00261225	16354	7158	0.135713	0.780157	11545	14546	orf19.6565	OXA1	Mitochondrial inner membrane insertase, mediates the insertion of both mitochondrial- and nuclear-encoded proteins from the matrix into the inner membrane, interacts with mitochondrial ribosomes; conserved from bacteria to animals
CPAR2_207240		-0.425263	0.660634	4799	3489	-0.63383	2.41801e-05	11311	8162	-1.65482	1.14166e-06	10964	4593	-0.609027	0.523655	9822	7694	orf19.392	CBP4	Mitochondrial protein required for assembly of cytochrome bc1 complex; interacts with the Cbp3p-Cbp6p complex and newly synthesized cytochrome b (Cobp) to promote assembly of Cobp into the cytochrome bc1 complex
CPAR2_503520		-0.355944	0.513236	33385	25472	0.884328	0.0229462	48218	98039	1.65417	0.00726645	35523	141603	0.515398	0.305334	11102	18732	orf19.6994 (BAT22)
CPAR2_210170		0.0351525	0.994923	3076	3082	0.0109975	0.988589	2229	2514	1.65263	0.000412159	1705	7347	-0.110544	0.822791	4717	5083	orf19.3540 (MAK5)	MAK5	Essential nucleolar protein, putative DEAD-box RNA helicase required for maintenance of M1 dsRNA virus; involved in biogenesis of large (60S) ribosomal subunits
CPAR2_406160		-1.51238	0.0638675	4609	1577	-1.65257	5.15843e-15	8815	3109	0.0904197	0.904677	2556	3619	-0.127367	0.889692	631	689	orf19.1614 (MEP1)	MEP3	Ammonium permease of high capacity and low affinity; belongs to a ubiquitous family of cytoplasmic membrane proteins that transport only ammonium (NH4+); expression is under the nitrogen catabolite repression regulation ammonia permease
CPAR2_103760		0.0354716	0.992929	8653	8631	0.215613	0.194991	8289	10801	1.65243	0.000212019	7446	30420	0.148733	0.699426	9554	12298	orf19.2436	SKY1	SR protein kinase (SRPK) involved in regulating proteins involved in mRNA metabolism and cation homeostasis; similar to human SRPK1
CPAR2_406050		0.233936	0.985725	19743	22741	-0.484193	0.0434352	33361	26792	-1.65104	2.76192e-06	30049	12600	-0.0178218	0.967269	17036	19644	orf19.1390 (PMI1)	PMI40	Mannose-6-phosphate isomerase, catalyzes the interconversion of fructose-6-P and mannose-6-P; required for early steps in protein mannosylation
CPAR2_102110		0.362974	0.855676	3028	3772	-0.185193	0.665924	1271	1260	1.64747	9.4436e-05	975	4054	0.498543	0.362719	2689	4367	orf19.262 (SMC3)	SMC3	Subunit of the multiprotein cohesin complex required for sister chromatid cohesion in mitotic cells; also required, with Rec8p, for cohesion and recombination during meiosis; phylogenetically conserved SMC chromosomal ATPase family member
CPAR2_207960		0.460321	0.747447	3212	4323	0.213093	0.788683	2880	3777	1.64702	0.000917912	2663	11330	-0.485591	0.302242	11001	9284	orf19.661 (KRR1)	KRR1	Essential nucleolar protein required for the synthesis of 18S rRNA and for the assembly of 40S ribosomal subunit
CPAR2_101230		0.515369	0.980219	20185	28399	-1.64381	0.000366356	20231	7246	-0.389461	0.465397	10032	10260	-0.0787202	0.886096	23482	25673	orf19.4274 (PUT1)	PUT1	Proline oxidase, nuclear-encoded mitochondrial protein involved in utilization of proline as sole nitrogen source; PUT1 transcription is induced by Put3p in the presence of proline and the absence of a preferred nitrogen source
CPAR2_501840		0.00429244	0.999014	4979	4838	-0.756677	0.0020635	8879	5798	-1.64169	1.6851e-06	8250	3563	-0.354243	0.275025	4378	3980	orf19.1968
CPAR2_806570		-0.497073	0.680352	53645	37175	-0.554152	0.0253323	78589	59547	1.63849	5.26278e-09	56417	232561	0.13101	0.77866	49841	64020	orf19.1358 (GCN4)	GCN4	Basic leucine zipper (bZIP) transcriptional activator of amino acid biosynthetic genes in response to amino acid starvation; expression is tightly regulated at both the transcriptional and translational levels
CPAR2_502690		-0.291832	0.46839	6227	4959	-0.221328	0.367596	9930	9557	-1.63829	1.8503e-07	10495	4438	-0.258273	0.604649	4664	4575	orf19.3950 (MSM1)	MSM1	Mitochondrial methionyl-tRNA synthetase (MetRS), functions as a monomer in mitochondrial protein synthesis; functions similarly to cytoplasmic MetRS although the cytoplasmic form contains a zinc-binding domain not found in Msm1p
CPAR2_500490		-1.6382	0.00715724	1015	316	-1.14999	0.135543	1042	517	-0.0874478	0.891885	578	720	0.274145	0.681405	438	610	No C.albicans ortholog
CPAR2_802830		-0.614068	0.539258	11926	7628	0.283768	0.286973	15222	20738	1.6376	0.00470985	11889	46407	0.329381	0.189116	8327	12216	orf19.2546 (TRP2)	TRP2	Anthranilate synthase, catalyzes the initial step of tryptophan biosynthesis, forms multifunctional hetero-oligomeric anthranilate synthase:indole-3-glycerol phosphate synthase enzyme complex with Trp3p
CPAR2_301710		-0.482763	0.680791	22395	15675	-0.809352	9.23165e-07	20765	13247	-1.63639	0.00274781	18788	8248	0.16232	0.77032	14584	18710	orf19.4751	RSM25	Mitochondrial ribosomal protein of the small subunit
CPAR2_401885		0.443201	0.988692	1106	1448	-0.876765	0.0308402	668	413	-1.63585	0.0165638	852	380	-0.331195	0.494911	3364	3131	orf19.2917.1
CPAR2_805720		-0.548094	0.292409	1986	1319	-0.700689	0.0383394	2229	1529	-1.6346	1.58907e-06	2280	974	-0.472838	0.607141	3264	2793	orf19.2169
CPAR2_806250		0.313237	0.789085	5242	6358	-0.0623155	0.943681	4402	4758	1.63278	0.0145048	3870	16875	-0.0691044	0.870257	13338	14700	orf19.1404	DUS1	Dihydrouridine synthase, member of a widespread family of conserved proteins including Smm1p, Dus3p, and Dus4p; modifies pre-tRNA(Phe) at U17
CPAR2_103450		0.335888	0.992929	32679	40665	-0.576726	0.00863926	110640	82643	-1.63084	0.00017505	122489	52298	-0.115612	0.825119	7540	8156	orf19.2803 (HEM13)	HEM13	Coproporphyrinogen III oxidase, an oxygen requiring enzyme that catalyzes the sixth step in the heme biosynthetic pathway; transcription is repressed by oxygen and heme (via Rox1p and Hap1p)
CPAR2_401220		-0.215065	0.811775	5608	4711	-0.311868	0.453073	11333	10112	-1.62765	0.000258695	12401	5276	-0.175382	0.77866	5774	6069	orf19.4617	MAK3	Catalytic subunit of N-terminal acetyltransferase of the NatC type; required for replication of dsRNA virus
CPAR2_210130		-0.152107	0.993547	10258	8905	-1.62739	8.13019e-08	1720	631	1.14699	0.0571195	2093	6324	0.0272804	0.966561	4211	5075	orf19.3537	SRX1	Sulfiredoxin, contributes to oxidative stress resistance by reducing cysteine-sulfinic acid groups in the peroxiredoxin Tsa1p, which is formed upon exposure to oxidants; conserved in higher eukaryotes
CPAR2_405780		0.568748	0.765395	13168	18911	1.43683	3.7441e-08	13945	42554	1.62695	2.86974e-05	16331	69746	0.828285	0.134468	2278	4639	No C.albicans ortholog
CPAR2_405560		0.0827162	0.99233	77704	79954	-0.405499	0.142698	61886	52659	-1.62338	4.02939e-05	65464	28431	-0.273754	0.54212	107626	104880	orf19.5964 (ARF2)	ARF2	ADP-ribosylation factor, GTPase of the Ras superfamily involved in regulation of coated formation vesicles in intracellular trafficking within the Golgi; functionally interchangeable with Arf1p
CPAR2_205680		0.355181	0.819567	752	934	0.364614	0.390187	1114	1612	1.62206	0.00381055	2008	8583	-0.219814	0.722931	2135	2183	orf19.6366
CPAR2_405950		0.264377	0.910599	42946	49994	0.0884446	0.811087	36078	43440	-1.61979	0.0024603	48970	21923	-0.0649154	0.915002	32715	35536	orf19.1376	SSO2	Plasma membrane t-SNARE involved in fusion of secretory vesicles at the plasma membrane; syntaxin homolog that is functionally redundant with Sso1p
CPAR2_110450		0.110624	0.980219	6065	6372	-0.311532	0.316855	5646	5137	1.61971	0.0205798	5848	24484	0.0958287	0.846573	17782	21837	orf19.6052 (CNS1)	CNS1	TPR-containing co-chaperone; binds both Hsp82p (Hsp90) and Ssa1p (Hsp70) and stimulates the ATPase activity of SSA1, ts mutants reduce Hsp82p function while over expression suppresses the phenotypes of an HSP82 ts allele and a cpr7 deletion
CPAR2_301770		0.808042	1.39193e-06	36556	62203	1.61883	1.69377e-18	24111	83075	-0.596255	0.241663	22400	18942	-0.0500678	0.932605	11504	13166	orf19.4754 (ZWF1)	ZWF1	Glucose-6-phosphate dehydrogenase (G6PD), catalyzes the first step of the pentose phosphate pathway; involved in adapting to oxidatve stress; homolog of the human G6PD which is deficient in patients with hemolytic anemia
CPAR2_208860		0.0135519	0.999	4210	4163	0.449912	0.250843	2892	4410	1.61811	0.00142075	2465	10215	-0.314674	0.548096	13842	13193	orf19.2778	URB1	Nucleolar protein required for the normal accumulation of 25S and 5.8S rRNAs, associated with the 27SA2 pre-ribosomal particle; proposed to be involved in the biogenesis of the 60S ribosomal subunit
CPAR2_205875		0.114482	0.982201	1019	1075	-0.802417	0.228805	1342	859	-1.61755	0.000157963	1280	558	-0.92251	0.274196	4228	2666	No C.albicans ortholog
CPAR2_202070		0.56781	0.323642	11040	15869	-0.381966	0.102653	16628	14435	-1.61731	0.0108585	22101	9799	-0.0416288	0.943768	15321	16950	orf19.515	YER137C	Putative protein of unknown function
CPAR2_103970		-0.420039	0.813059	151139	110471	-1.49687	1.07671e-06	113904	45261	-1.61715	0.00848828	103010	44379	-0.37005	0.604014	197930	180258	orf19.4490 (RPL17B)	RPL17B	Protein component of the large (60S) ribosomal subunit, nearly identical to Rpl17Ap and has similarity to E. coli L22 and rat L17 ribosomal proteins
CPAR2_603390		-0.196336	0.747075	17155	14562	-0.267677	0.114488	14477	13502	-1.61673	4.60047e-08	12644	5496	-0.0526971	0.889692	7970	8911	orf19.6327 (HET1)
CPAR2_110140		-0.469586	0.374982	12287	8618	-0.879248	8.06359e-07	12312	7566	-1.61512	0.0322269	14226	6394	-0.218342	0.672746	26738	26682	orf19.3297	RSM27	Mitochondrial ribosomal protein of the small subunit
CPAR2_404460		-0.214513	0.82653	7798	6557	0.841719	9.64817e-05	5628	11279	-1.61426	8.81745e-05	4654	2099	0.0744252	0.876985	2744	3362	orf19.7410	CYM1	Lysine-specific metalloprotease of the mitochondrial intermembrane space, member of the pitrilysin family; degrades proteins and presequence peptides cleaved from imported proteins; required for normal mitochondrial morphology
CPAR2_403470		0.471584	0.831125	4617	6203	0.619284	0.0382074	12035	20435	1.61356	0.00167633	11464	45921	0.161889	0.734009	6882	9041	orf19.3369 (MOH1)	MOH1	Protein of unknown function, has homology to kinase Snf7p; not required for growth on nonfermentable carbon sources; essential for survival in stationary phase
CPAR2_501730		-0.00296946	0.99935	1928	1884	-0.230971	0.764186	1097	1041	1.61268	0.0384631	898	3895	0.141078	0.863646	2524	3178	orf19.6298 (SPB4)	SPB4	Putative ATP-dependent RNA helicase, nucleolar protein required for synthesis of 60S ribosomal subunits at a late step in the pathway; sediments with 66S pre-ribosomes in sucrose gradients
CPAR2_207430		0.157546	0.869408	3244	3524	1.41645	1.14868e-14	2151	6455	1.61246	1.1522e-05	1891	7631	-0.00649948	0.990926	3092	3606	No C.albicans ortholog
CPAR2_406990		-0.661822	0.109493	3928	2425	-0.323481	0.288777	3727	3298	-1.6124	0.00110554	3614	1610	-0.0157773	0.970261	3505	4072	orf19.1352 (TIM22)	TIM22	Essential core component of the mitochondrial TIM22 complex involved in insertion of polytopic proteins into the inner membrane; forms the channel through which proteins are imported
CPAR2_202400		0.151863	0.992929	1857	2014	-0.00904864	0.993457	1498	1679	1.61211	0.0362675	1192	5135	-0.161197	0.714061	6208	6534	orf19.475	IPI1	Essential component of the Rix1 complex (with Rix1p and Ipi3p) that is required for processing of ITS2 sequences from 35S pre-rRNA; Rix1 complex associates with Mdn1p in pre-60S ribosomal particles
CPAR2_108920		-0.192453	0.777206	35573	30252	-1.04001	0.0118657	48208	26921	-1.61122	0.0509619	61775	27999	-0.302097	0.634496	64603	61387	orf19.3064 (MRPL27)	MRPL27	Mitochondrial ribosomal protein of the large subunit
CPAR2_800520		0.00979731	0.999	134	131	0.281758	0.723889	250	340	1.61099	0.0144666	189	741	-0.460358	0.578656	286	245	orf19.7512
CPAR2_704040		-0.0195382	0.998689	6265	6034	-0.745731	0.00122556	18529	12501	-1.6101	0.00610466	22664	9579	-0.602745	0.0937161	9146	7125	orf19.1336.2	CMC2	Protein of the mitochondrial intermembrane space with a role in respiratory chain complex assembly or maintenance; contains twin Cx9C motifs that can form coiled coil-helix-coiled-coil helix fold
CPAR2_303840		-0.220316	0.980219	20142	16769	-0.86946	1.48431e-05	24826	15248	-1.61003	0.00700005	33164	14901	-0.441076	0.49947	29303	25421	orf19.1960 (CLN3)	CLN3	G1 cyclin involved in cell cycle progression; activates Cdc28p kinase to promote the G1 to S phase transition; plays a role in regulating transcription of the other G1 cyclins, CLN1 and CLN2; regulated by phosphorylation and proteolysis
CPAR2_701760		-0.377713	0.800795	13975	10517	-0.702926	2.59474e-05	13840	9554	-1.60853	0.0139227	13485	6155	0.256231	0.703835	5562	7530	orf19.6129 (MRPL8)	MRPL8	Mitochondrial ribosomal protein of the large subunit
CPAR2_804910		-0.0528983	0.993547	3573	3373	-0.311242	0.450312	3351	3030	1.60799	6.39007e-07	2760	11275	-0.222497	0.549734	7875	7894	orf19.4835	UTP7	Nucleolar protein, component of the small subunit (SSU) processome containing the U3 snoRNA that is involved in processing of pre-18S rRNA
CPAR2_407930		0.22499	0.410137	11340	12894	0.572491	0.195794	10930	18203	1.6065	0.00562179	8468	34152	0.0804266	0.92464	8676	10607	orf19.5326
CPAR2_407390		0.167187	0.99233	8995	9795	0.494916	0.0643857	8266	13101	1.60185	2.49741e-05	7208	29124	0.0834866	0.841551	6193	7700	orf19.1764
CPAR2_301720		-0.225444	0.99233	22447	18811	-0.246307	0.530965	81689	77875	-1.60156	0.000138527	101839	44417	-0.551894	0.462919	69037	55494	orf19.4751.1
CPAR2_207400		-0.307033	0.888917	2805	2217	0.101549	0.761668	3997	4812	1.60131	0.00506783	2846	10945	0.0349601	0.951787	4089	4925	orf19.5097 (CAT8)	CAT8	Zinc cluster transcriptional activator necessary for derepression of a variety of genes under non-fermentative growth conditions, active after diauxic shift, binds carbon source responsive elements
CPAR2_405310		-0.370709	0.769594	127186	95982	-1.48347	1.33541e-09	114084	45603	-1.60087	0.0803803	106079	46404	-0.563231	0.380807	405790	328619	orf19.5996.1 (RPS19A)	RPS19A	Protein component of the small (40S) ribosomal subunit, required for assembly and maturation of pre-40 S particles; mutations in human RPS19 are associated with Diamond Blackfan anemia; nearly identical to Rps19Bp
CPAR2_210540		-0.185523	0.984943	148850	127434	-1.5999	7.02374e-19	124024	45861	-1.59036	NA	124375	55049	-0.458891	0.341205	648888	557065	orf19.2329.1 (RPS17B)	RPS17B	Ribosomal protein 51 (rp51) of the small (40s) subunit; nearly identical to Rps17Ap and has similarity to rat S17 ribosomal protein
CPAR2_209640		-0.511844	0.0464457	61970	42346	-0.610812	0.0205351	84534	61697	-1.59966	0.000379806	86048	38428	0.0453506	0.895533	61751	73905	orf19.185	MRP51	Mitochondrial ribosomal protein of the small subunit; MRP51 exhibits genetic interactions with mutations in the COX2 and COX3 mRNA 5'-untranslated leader sequences
CPAR2_201640		-0.265859	0.898842	6906	5579	-0.586426	0.18443	8952	6521	-1.59903	1.16383e-06	7722	3352	-0.186136	0.767916	8350	8639	orf19.5014	LCL3	Putative protein of unknown function; mutant has long chronological lifespan; has homology to Staphylococcus aureus nuclease; GFP-fusion protein localizes to mitochondria; is induced in response to the DNA-damaging agent MMS
CPAR2_212190		1.04999	0.000635826	8769	17634	-0.239853	0.436774	5497	5170	1.59815	7.84763e-07	3724	15313	0.11302	0.860788	2199	2771	orf19.5805 (DLD1)
CPAR2_801610		0.095564	0.992929	45218	46837	-0.483308	0.148367	12208	9832	1.59743	0.00600526	9550	39591	-0.171016	0.64349	45267	46738	No C.albicans ortholog
CPAR2_200650		0.108168	0.992929	141	148	-1.59702	0.0465867	339	126	-1.45185	0.0305317	140	67	1.26248	0.000935907	135	377	orf19.7585 (INO1)	INO1	Inositol-3-phosphate synthase, involved in synthesis of inositol phosphates and inositol-containing phospholipids; transcription is coregulated with other phospholipid biosynthetic genes by Ino2p and Ino4p, which bind the UASINO DNA element
CPAR2_208010		-0.130795	0.804138	7573	6734	0.300627	0.11017	5505	7586	1.59662	0.000183867	3996	15743	0.206295	0.608111	5969	7972	orf19.4451 (RIA1)	RIA1	Cytoplasmic GTPase involved in ribosomal biogenesis; with Sdo1p, promotes release of Tif6p from 60S ribosomal subunits in the cytoplasm so that they can assemble with 40S subunits to generate mature ribosomes
CPAR2_806600		-0.0786725	0.99233	26022	23967	-0.38767	0.118945	21164	18050	-1.59596	1.73088e-06	21570	9552	-0.324884	0.53921	44950	42237	orf19.1372
CPAR2_102860		-0.281634	0.990932	48189	38399	-0.305153	0.082915	86846	78469	-1.59454	0.000258695	95374	41686	-0.156392	0.831096	52922	55321	orf19.233.1 (HRT1)	HRT1	RING finger containing subunit of Skp1-Cullin-F-box ubiquitin protein ligases (SCF); required for Gic2p, Far1p, Sic1p and Cln2p degradation; may tether Cdc34p (a ubiquitin conjugating enzyme or E2) and Cdc53p (a cullin) subunits of SCF
CPAR2_207590		0.474613	0.944994	6847	9346	0.168213	0.781812	9035	11361	1.59328	0.0140384	6677	29356	0.263838	0.764268	3908	5412	orf19.4792
CPAR2_100780		-1.5927	0.0290605	29685	9536	-0.919626	1.20121e-05	66378	38901	-1.2009	0.0524666	48601	26953	-0.660492	0.270925	25821	19073	No C.albicans ortholog
CPAR2_501390		-0.369792	0.740622	22138	16735	0.584487	0.018921	23463	39197	1.5926	0.00370778	17903	68683	0.536745	0.00978116	9351	15727	orf19.4718 (TRP5)	TRP5	Tryptophan synthase, catalyzes the last step of tryptophan biosynthesis; regulated by the general control system of amino acid biosynthesis
CPAR2_407160	MET32	1.59224	2.79994e-15	4612	13548	0.375398	0.341652	3340	4859	1.40317	0.0288774	4584	17166	0.200315	0.724834	4485	5889	orf19.1757	MET32	Zinc-finger DNA-binding protein, involved in transcriptional regulation of the methionine biosynthetic genes, similar to Met31p
CPAR2_807170		0.21611	0.715389	1461	1650	1.59152	5.79099e-24	1626	5500	0.814894	0.00350094	1347	3226	-0.227035	0.634496	2037	2043	orf19.7365	FYV10	Subunit of GID complex; involved in proteasome-dependent catabolite inactivation of gluconeogenic enzymes FBPase, PEPCK, and c-MDH; interacts with Rmd5p and contains a degenerate RING finger motif needed for GID complex ubiquitin ligase activity in vivo; contains CTLH domain; plays role in anti-apoptosis; required for survival upon exposure to K1 killer toxin
CPAR2_202180		-0.0484046	0.993547	4623	4366	-0.39917	0.312634	3986	3383	1.59103	0.00393841	3162	12934	0.00568783	0.992305	10270	11980	orf19.500	GCD10	Subunit of tRNA (1-methyladenosine) methyltransferase with Gcd14p, required for the modification of the adenine at position 58 in tRNAs, especially tRNAi-Met; first identified as a negative regulator of GCN4 expression
CPAR2_400230		0.230343	0.932877	965	1098	1.5897	1.62024e-18	1330	4469	0.83791	0.0669618	916	2295	0.200792	0.790995	891	1199	No C.albicans ortholog
CPAR2_801290		-0.109091	0.993547	81	73	-0.604907	0.435085	133	99	-1.58787	0.0294081	98	42	-0.459813	0.634496	462	392	orf19.3738 (PGA22)
CPAR2_702410		-0.419307	0.133109	20461	14879	-0.647109	0.0317521	20532	14496	-1.58661	0.000270978	17182	7706	-0.211385	0.629408	9739	9802	orf19.7082	PET8	S-adenosylmethionine transporter of the mitochondrial inner membrane, member of the mitochondrial carrier family; required for biotin biosynthesis and respiratory growth
CPAR2_400530		-0.0901806	0.993547	111	101	-0.10892	0.915479	155	159	-1.58614	0.00265641	165	74	-0.39451	0.805094	131	121	orf19.4596	TDA11	Putative protein of unknown function; green fluorescent protein (GFP)-fusion protein localizes to the cytoplasm; potential Cdc28p substrate; null mutant is sensitive to expression of the top1-T722A allele
CPAR2_102250		0.10801	0.93737	4651	4883	1.58606	6.13755e-33	5354	18014	0.427095	0.471438	4734	8408	-0.0576449	0.887359	2512	2831	orf19.6973
CPAR2_502360		0.0120475	0.999	2775	2719	-0.119956	0.855204	1494	1523	1.58491	0.00744656	1051	4473	0.544678	0.615938	2157	3632	orf19.4231 (PTH2)
CPAR2_108400		-0.554123	0.575399	15204	10127	-0.0620849	0.913126	15268	16369	1.5845	0.00218926	10206	38913	0.78234	0.0250951	6029	12051	orf19.2970 (LYS2)	LYS2	Alpha aminoadipate reductase, catalyzes the reduction of alpha-aminoadipate to alpha-aminoadipate 6-semialdehyde, which is the fifth step in biosynthesis of lysine; activation requires posttranslational phosphopantetheinylation by Lys5p
CPAR2_209780		-0.74537	0.409963	32034	18697	-1.5403	2.62741e-07	41836	15868	-1.58432	0.0246736	29236	13174	-0.844609	1.90481e-06	28159	18271	orf19.4118 (CNT)
CPAR2_801380		0.272007	0.807252	1771	2087	-0.184804	0.830275	1053	1047	1.58004	0.014934	846	3504	-0.330259	0.527734	3091	2879	orf19.3724	UTP23	Component of the small subunit processome, involved in 40S ribosomal subunit biogenesis; interacts with snR30 and is required for dissociation of snR30 from large pre-ribosomal particles; has homology to PINc domain protein Fcf1p, although the PINc domain of Utp23p is not required for function; essential protein
CPAR2_203330		0.142389	0.984943	4593	4925	1.57978	2.52507e-11	4341	14394	-1.31516	9.20665e-05	3913	2117	0.173976	0.733913	2756	3575	orf19.651 (LYP1)
CPAR2_405240		0.0531213	0.993547	2098	2116	1.57952	5.81477e-16	4257	14268	-0.601234	0.129333	4593	4148	-0.952203	2.11341e-08	7519	4571	orf19.6948 (CCC1)	CCC1	Putative vacuolar Fe2+/Mn2+ transporter; suppresses respiratory deficit of yfh1 mutants, which lack the ortholog of mammalian frataxin, by preventing mitochondrial iron accumulation
CPAR2_504190		-0.0254295	0.998689	9907	9519	-0.31721	0.561451	6251	5661	1.57775	0.00113191	5376	21796	-0.163769	0.66916	29175	30344	orf19.7635 (DRS1)	DRS1	Nucleolar DEAD-box protein required for ribosome assembly and function, including synthesis of 60S ribosomal subunits; constituent of 66S pre-ribosomal particles
CPAR2_407690		-0.201138	0.903101	211661	179545	-0.716942	0.018921	153456	104742	-1.57653	0.000960584	146610	65184	-0.426734	0.54212	246044	215948	orf19.1435 (TEF1)	TEF1	Translational elongation factor EF-1 alpha; also encoded by TEF2; functions in the binding reaction of aminoacyl-tRNA (AA-tRNA) to ribosomes; may also have a role in tRNA re-export from the nucleus
CPAR2_208420		-0.176016	0.99233	525	451	-0.306634	0.445969	500	451	1.57647	0.00262686	319	1222	0.0872875	0.91113	640	807	No C.albicans ortholog
CPAR2_401720		0.0964426	0.992929	465	484	0.216656	0.753063	364	470	1.57641	0.00167172	356	1471	0.348108	0.672041	812	1196	orf19.1417
CPAR2_805730		-0.148755	0.992929	149950	131304	-0.460654	0.0701712	189139	152755	-1.57434	7.92401e-06	203934	91018	-0.148751	0.820397	118018	124844	orf19.2168.3	YOP1	Membrane protein that interacts with Yip1p to mediate membrane traffic; interacts with Sey1p to maintain ER morphology; overexpression leads to cell death and accumulation of internal cell membranes
CPAR2_503140		-0.482195	0.459379	27243	19040	-0.468992	0.0596699	28460	22927	-1.57419	4.58774e-05	24766	10907	-0.0589861	0.863412	14143	15876	orf19.1669 (AFG3)	AFG3	Component, with Yta12p, of the mitochondrial inner membrane m-AAA protease that mediates degradation of misfolded or unassembled proteins and is also required for correct assembly of mitochondrial enzyme complexes
CPAR2_200210		-0.851544	0.152923	9620	5218	-0.57293	0.0887723	12809	9608	1.57365	0.0018917	9013	34053	0.615219	0.0534825	5107	9074	orf19.7638 (PRO1)	PRO1	Gamma-glutamyl kinase, catalyzes the first step in proline biosynthesis
CPAR2_108260		0.195104	0.992929	2722	3064	0.441447	0.390612	2427	3716	1.57115	0.01255	2206	8970	-0.23734	0.624553	28670	28813	orf19.4532	YER156C	Putative protein of unknown function; interacts with Hsp82p and copurifies with Ipl1p; expression is copper responsive and downregulated in strains deleted for MAC1, a copper-responsive transcription factor; similarity to mammalian MYG1
CPAR2_212730		-0.176067	0.910599	51202	44025	-0.182041	0.751729	97870	95718	1.57062	0.00128247	72343	276997	0.536583	0.175137	44028	73321	orf19.4513
CPAR2_704250		0.217491	0.705207	4658	5267	0.472631	0.0773942	4917	7719	1.57051	0.0026829	5891	24217	-0.232856	0.66916	5870	5915	orf19.5159	DUG3	Component of glutamine amidotransferase (GATase II); forms a complex with Dug2p to degrade glutathione (GSH) and other peptides containing a gamma-glu-X bond in an alternative pathway to GSH degradation by gamma-glutamyl transpeptidase (Ecm38p)
CPAR2_701790		-0.0974795	0.964644	11795	10727	-0.603573	0.000505615	14676	10800	-1.57001	2.46139e-07	12206	5547	0.022495	0.955739	4443	5230	orf19.6284	SRP102	Signal recognition particle (SRP) receptor beta subunit; involved in SRP-dependent protein targeting; anchors the alpha subunit, Srp101p to the ER membrane
CPAR2_210680		1.01317	0.271972	5386	10655	1.56967	7.05139e-21	8198	27416	0.946948	0.0100482	9740	25392	-0.279576	0.56421	10392	10116	orf19.5812	ETT1	Nuclear protein that inhibits replication of Brome mosaic virus in S. cerevisiae, which is a model system for studying replication of positive-strand RNA viruses in their natural hosts; deletion increases stop codon readthrough
CPAR2_209550		0.342471	0.538456	2497	3086	0.159099	0.689287	2809	3502	1.56869	0.00817082	2404	10316	0.159448	0.875299	4093	5171	orf19.5204	BOP3	Protein of unknown function, potential Cdc28p substrate; overproduction confers resistance to methylmercury
CPAR2_203720		-0.107357	0.992929	1272	1145	0.216971	0.346824	1602	2087	1.56771	8.8563e-05	1483	5902	0.0255428	0.95447	1948	2319	orf19.4784 (CRP1)
CPAR2_806040		-1.56708	0.049316	67	22	0.636344	0.321758	151	258	-1.2496	0.0122295	132	76	0.51153	0.624553	141	237	orf19.5896	YMR244W	Putative protein of unknown function
CPAR2_400990		0.445416	0.854561	26067	34326	-0.0112759	0.983637	27605	31006	-1.56675	0.012517	39147	18002	-0.129057	0.819581	27739	29731	orf19.4633	YMR226C	NADP(+)-dependent dehydrogenase; acts on serine, L-allo-threonine, and other 3-hydroxy acids; green fluorescent protein fusion protein localizes to the cytoplasm and nucleus; may interact with ribosomes, based on co-purification experiments
CPAR2_801330		-0.166367	0.920051	27044	23395	-0.133216	0.750453	20095	20459	-1.56643	0.00115269	17767	8254	-0.00495116	0.994034	15900	18423	orf19.2615 (MDL1)	MDL1	Mitochondrial inner membrane half-type ATP-binding cassette (ABC) transporter, mediates export of peptides generated upon proteolysis of mitochondrial proteins, plays a role in the regulation of cellular resistance to oxidative stress
CPAR2_109210		0.118489	0.90017	3233	3415	-0.101973	0.875321	4294	4546	1.56624	8.52192e-05	3329	13072	-0.13618	0.736708	4973	5262	orf19.3330 (CRL1)	RHO4	Non-essential small GTPase of the Rho/Rac subfamily of Ras-like proteins, likely to be involved in the establishment of cell polarity
CPAR2_702630		0.120579	0.938532	1165	1233	0.644432	0.0626749	1676	2909	1.56553	0.0025815	1184	4617	0.552532	0.641888	305	501	orf19.6555	HOT13	Zinc-binding mitochondrial intermembrane space (IMS) protein involved in a disulfide relay system for IMS import of cysteine-containing proteins; binds Mia40p and stimulates its Erv1p-dependent oxidation, probably by sequestering zinc
CPAR2_502130		1.56293	0.81699	25713	72920	-1.21998	0.00201493	997	487	-0.149475	0.799335	949	1208	-0.325496	0.644309	2267	2128	No C.albicans ortholog
CPAR2_702560		-0.339505	0.885226	177871	137290	-1.56194	4.98929e-12	110319	41764	-1.43592	0.0560655	96351	47924	-0.150637	0.63349	109334	115067	orf19.6541 (RPL5)	RPL5	Protein component of the large (60S) ribosomal subunit with similarity to E. coli L18 and rat L5 ribosomal proteins; binds 5S rRNA and is required for 60S subunit assembly
CPAR2_802630		0.12855	0.82618	9363	9960	0.704396	0.00272897	6684	12278	1.56103	7.29724e-05	6173	25204	0.122996	0.841407	5612	7078	orf19.166 (ASG1)	ASG1	Zinc cluster protein proposed to function as a transcriptional regulator involved in the stress response; null mutants have a respiratory deficiency, calcofluor white sensitivity and slightly increased cycloheximide resistance
CPAR2_203840		0.121777	0.992929	14245	15007	-0.690374	0.000952587	20275	14218	-1.55923	0.00430476	21431	9683	-0.391459	0.634366	40217	36264	orf19.1738.1	RBL2	Protein involved in microtubule morphogenesis, required for protection from excess free beta-tubulin; proposed to be involved the folding of beta-tubulin; similar to mouse beta-tubulin cofactor A
CPAR2_109130		0.310698	0.938532	6490	7806	-0.204309	0.611967	5177	5063	-1.5581	9.20665e-05	5045	2227	-0.195219	0.661563	7221	7387	orf19.3322 (DUT1)	DUT1	deoxyuridine triphosphate diphosphatase (dUTPase); catalyzes hydrolysis of dUTP to dUMP and PPi, thereby preventing incorporation of uracil into DNA during replication; critical for the maintenance of genetic stability; also has diphosphatase activity on deoxyinosine triphosphate
CPAR2_804670		-0.157352	0.826733	29578	25805	-0.283425	0.293275	30161	27700	-1.55693	2.98883e-10	29677	13511	0.0217429	0.959327	7803	9249	orf19.5103
CPAR2_806720		0.654167	0.692179	3029	4613	-1.55675	3.53189e-11	3459	1302	-0.0717051	0.922879	3267	4336	-0.477534	0.228849	5863	4960	No C.albicans ortholog
CPAR2_202130		0.172303	0.992929	7038	7797	-1.55594	1.25312e-11	20520	7781	-1.12416	0.0288828	16616	10143	0.101181	0.825119	2464	3072	orf19.6992
CPAR2_100570		-0.00726916	0.999	3698	3587	0.74687	0.00184307	3052	5696	1.55558	7.48385e-06	2158	8433	0.158396	0.81089	1460	1936	No C.albicans ortholog
CPAR2_301060		-0.0400567	0.998689	5219	4979	-0.00265448	0.99741	3254	3655	1.55445	0.00301227	2458	9807	0.0226619	0.965553	9763	11428	orf19.7062 (RPA135)	RPA135	RNA polymerase I second largest subunit A135
CPAR2_212670		-0.0463743	0.993547	927	873	-0.235363	0.436814	1194	1137	1.55407	0.00414672	1127	4253	-0.0284579	0.963084	1531	1764	orf19.4438 (RME1)	RME1	Zinc finger protein involved in control of meiosis; prevents meiosis by repressing IME1 expression and promotes mitosis by activating CLN2 expression; directly repressed by a1-alpha2 regulator; mediates cell type control of sporulation
CPAR2_303270		0.111017	0.993547	7062	7370	-0.145335	0.822328	18695	18568	-1.55378	1.31807e-05	17683	8419	-0.738132	0.0138056	12885	8840	orf19.1926 (SEF2)
CPAR2_404350		0.00405266	0.999	19456	18921	-0.637733	1.14834e-05	32799	23639	-1.55318	0.000482831	40012	18460	0.0047275	0.995424	22806	26329	orf19.3594
CPAR2_502110		1.55279	0.000393571	4803	13681	0.160108	0.506602	5981	7480	0.519974	0.191283	6498	12472	0.0714906	0.904385	3049	3809	orf19.993
CPAR2_203130		0.103919	0.992929	1183	1241	-0.185875	0.794391	1116	1101	1.55266	0.000972601	850	3391	-0.0416229	0.937935	2825	3199	orf19.603 (IMP4)	IMP4	Component of the SSU processome, which is required for pre-18S rRNA processing; interacts with Mpp10p; member of a superfamily of proteins that contain a sigma(70)-like motif and associate with RNAs
CPAR2_700720		-0.395113	0.74205	197178	146267	-1.55017	1.42368e-13	178617	68147	-1.54539	0.0472998	166076	75662	-0.563424	0.362719	321132	259139	orf19.5225.2 (RPL27A)	RPL27A	Protein component of the large (60S) ribosomal subunit, nearly identical to Rpl27Bp and has similarity to rat L27 ribosomal protein
CPAR2_602130		-0.582222	0.541841	13058	8528	-0.924773	0.00105692	18573	10918	-1.54994	0.00521092	17364	7868	-0.1725	0.780383	6134	6460	orf19.685 (YHM1)	GGC1	Mitochondrial GTP/GDP transporter, essential for mitochondrial genome maintenance; has a role in mitochondrial iron transport; member of the mitochondrial carrier family
CPAR2_407650		-0.0749215	0.992929	3677	3410	-0.141888	0.817894	2145	2182	1.54925	0.00152036	1739	6886	-0.24889	0.379412	8602	8450	orf19.25	TRM10	tRNA methyltransferase, methylates the N-1 position of guanosine in tRNAs
CPAR2_703090		-0.261515	0.958015	33377	27230	-0.35392	0.0565956	38729	33886	-1.54908	3.68555e-05	33851	15715	0.193354	0.735437	11114	14644	orf19.3700 (TOM70)	TOM70	Component of the TOM (translocase of outer membrane) complex responsible for recognition and initial import steps for all mitochondrially directed proteins; acts as a receptor for incoming precursor proteins
CPAR2_800090		0.55703	0.408646	7885	11340	1.54825	9.88851e-09	8388	27467	-0.256548	0.524969	8882	10176	0.0976114	0.830493	6836	8403	orf19.7523 (MKC1)	SLT2	Serine/threonine MAP kinase; involved in regulating maintenance of cell wall integrity, progression through the cell cycle, and nuclear mRNA retention in heat shock; required for mitophagy and pexophagy; affects recruitment of mitochondria to the phagophore assembly site (PAS); regulated by the PKC1-mediated signaling pathway
CPAR2_101270		0.159279	0.99161	9312	10162	0.0209954	0.975899	7096	8061	1.54811	0.000644307	5385	21564	0.241831	0.64349	7750	10484	orf19.4282 (IFH1)
CPAR2_212080		0.24401	0.992929	14576	16693	0.392485	0.141044	12567	18768	-1.54772	0.0103731	16956	8221	0.150078	0.825119	4322	5473	orf19.1534	ZRT3	Vacuolar membrane zinc transporter, transports zinc from storage in the vacuole to the cytoplasm when needed; transcription is induced under conditions of zinc deficiency
CPAR2_403820		0.525087	0.344881	2462	3442	0.0140155	0.987819	1529	1724	1.54655	0.000258695	809	3278	-0.0992769	0.853652	2130	2323	No C.albicans ortholog
CPAR2_601990		-0.530858	0.42144	9481	6412	-0.629806	1.58511e-05	7482	5413	-1.54543	0.003774	7137	3314	0.131788	0.765098	3037	3887	orf19.5515	CBP3	Mitochondrial protein required for assembly of cytochrome bc1 complex; forms a complex with Cbp6p that binds to mt ribosomes near the polypeptide tunnel exit and promotes efficient translation of the COB mRNA; Cbp3p-Cbp6p complex also interacts with newly synthesized cytochrome b (Cobp) and Cbp4p to promote assembly of Cobp into the cytochrome bc1 complex
CPAR2_106180		-0.0530254	0.993547	2942	2778	-0.110835	0.838275	2341	2444	1.5441	0.00179907	1701	6777	0.291123	0.697801	4877	6779	orf19.3676 (ABP140)	ABP140	AdoMet-dependent tRNA methyltransferase and actin binding protein; C-terminal domain is responsible for 3-methylcytidine modification of residue 32 of the tRNA anticodon loop of tRNA-Thr and tRNA-Ser and contains an S-adenosylmethionine (AdoMet) binding motif; N-terminal actin binding sequence interacts with actin filaments and localizes to actin patches and cables; N- and C-terminal domains are …
CPAR2_401420		-0.427806	0.64857	5072	3685	-0.684656	8.29273e-05	5943	4129	-1.54314	0.00018103	4719	2206	-0.0269458	0.951787	1850	2100	orf19.3521 (ARH2)	ARH1	Oxidoreductase of the mitochondrial inner membrane, involved in cytoplasmic and mitochondrial iron homeostasis and required for activity of Fe-S cluster-containing enzymes; one of the few mitochondrial proteins essential for viability
CPAR2_703430		0.299191	0.0941607	11290	13533	1.54297	4.01541e-23	9279	30407	0.572243	0.0663774	9743	19469	0.242756	0.678087	5890	8003	orf19.6529 (CDC34)	CDC34	Ubiquitin-conjugating enzyme (E2) and catalytic subunit of SCF ubiquitin-protein ligase complex (together with Skp1p, Rbx1p, Cdc53p, and an F-box protein) that regulates cell cycle progression by targeting key substrates for degradation
CPAR2_207080		0.342367	0.264134	38960	48116	1.04408	6.59497e-08	23740	54733	1.54284	3.25785e-05	22234	87022	1.16726	5.55593e-08	12082	31965	orf19.385 (GCV2)	GCV2	P subunit of the mitochondrial glycine decarboxylase complex, required for the catabolism of glycine to 5,10-methylene-THF; expression is regulated by levels of 5,10-methylene-THF in the cytoplasm
CPAR2_213840		0.0796104	0.993547	2652	2744	0.0699408	0.911317	7913	9388	-1.54242	0.00689356	11177	5036	-0.433774	0.593265	6016	5312	orf19.2006.1 (COX17)	COX17	Copper metallochaperone that transfers copper to Sco1p and Cox11p for eventual delivery to cytochrome c oxidase; contains twin cysteine-x9-cysteine motifs
CPAR2_805050		0.00358104	0.999	8587	8377	-0.177448	0.723889	6568	6536	1.54181	0.032617	5922	23560	-0.375117	0.326432	55380	50452	orf19.4896	RPA34	RNA polymerase I subunit A34.5
CPAR2_807810		-0.192298	0.626436	5534	4718	-0.261618	0.48378	7207	6689	1.5417	0.00669939	5440	19945	-0.131943	0.850719	7746	8471	orf19.6180	MCH1	Protein with similarity to mammalian monocarboxylate permeases, which are involved in transport of monocarboxylic acids across the plasma membrane; mutant is not deficient in monocarboxylate transport
CPAR2_401050		-0.0260115	0.998689	6763	6507	-0.182928	0.776765	6234	6166	1.54143	7.24971e-05	5044	19796	-0.434541	0.462919	23013	20185	orf19.4640 (PWP1)	PWP1	Protein with WD-40 repeats involved in rRNA processing; associates with trans-acting ribosome biogenesis factors; similar to beta-transducin superfamily
CPAR2_102070		0.0604399	0.992929	2441	2477	0.0693017	0.821505	5336	6260	1.541	5.06793e-10	4276	16738	-0.0540974	0.949646	4387	4966	orf19.259	RSA1	Protein involved in the assembly of 60S ribosomal subunits; functionally interacts with Dbp6p; functions in a late nucleoplasmic step of the assembly
CPAR2_701820		-0.315668	0.821105	98688	77293	-1.27577	2.21291e-06	74948	34360	-1.54027	0.0760372	74241	34491	-0.468209	0.261789	101084	85715	orf19.6286.2 (RPS27)	RPS27B	Protein component of the small (40S) ribosomal subunit; nearly identical to Rps27Ap and has similarity to rat S27 ribosomal protein
CPAR2_806790		0.185567	0.992929	8118	9054	-0.189695	0.799826	4682	4641	1.53849	0.0105973	3809	15310	-0.083739	0.87495	16997	18534	orf19.7384 (NOG1)	NOG1	Putative GTPase that associates with free 60S ribosomal subunits in the nucleolus and is required for 60S ribosomal subunit biogenesis; constituent of 66S pre-ribosomal particles; member of the ODN family of nucleolar G-proteins
CPAR2_211180		0.227844	0.992929	9079	10254	0.141433	0.813082	11123	14069	-1.53762	0.000673571	14514	6722	-0.124445	0.81089	5857	6244	orf19.837.1 (INO4)	INO4	Transcription factor required for derepression of inositol-choline-regulated genes involved in phospholipid synthesis; forms a complex, with Ino2p, that binds the inositol-choline-responsive element through a basic helix-loop-helix domain
CPAR2_205810		0.102491	0.992929	3766	3952	0.0635595	0.938125	2368	2792	1.53752	0.0187404	2089	8302	-0.21484	0.626574	14574	14790	orf19.6418	YDL063C	Protein required for biogenesis of the large ribosomal subunit; green fluorescent protein (GFP)-fusion protein localizes to the cytoplasm and nucleus
CPAR2_806350		0.0971439	0.99233	9119	9492	-1.03565	1.23306e-09	27256	14974	-1.53714	0.0025815	28084	12808	0.00896025	0.992281	7509	8801	orf19.3605 (PEX17)
CPAR2_102520		-0.620218	0.575399	377	238	-0.800623	0.194263	410	266	-1.53605	0.0180065	623	296	-0.143754	0.825119	1152	1209	No C.albicans ortholog
CPAR2_808030		0.0281175	0.996012	3243	3229	-0.084754	0.888815	3461	3671	1.53367	0.000109949	2738	10962	0.313892	0.673753	4167	5892	orf19.6175	FCF2	Essential nucleolar protein involved in the early steps of 35S rRNA processing; interacts with Faf1p; member of a transcriptionally co-regulated set of genes called the RRB regulon
CPAR2_402980		0.111582	0.992929	3691	3899	0.0802833	0.875321	3351	3973	1.53283	0.00143122	2878	11277	-0.0308887	0.940331	9346	10570	orf19.3778	RSA4	WD-repeat protein involved in ribosome biogenesis; may interact with ribosomes; required for maturation and efficient intra-nuclear transport or pre-60S ribosomal subunits, localizes to the nucleolus
CPAR2_402700		-0.406646	0.888314	283019	206476	-0.306412	0.157019	141807	128525	-1.53081	6.92273e-06	118101	54063	-0.158941	0.802004	99783	103485	orf19.5641 (CAR2)	CAR2	L-ornithine transaminase (OTAse), catalyzes the second step of arginine degradation, expression is dually-regulated by allophanate induction and a specific arginine induction process; not nitrogen catabolite repression sensitive
CPAR2_803720		-0.484319	0.39393	25647	17880	-0.942331	6.87919e-11	28820	16749	-1.53008	0.0135923	26597	12509	0.0221626	0.963942	34028	40661	orf19.7485	MRPL9	Mitochondrial ribosomal protein of the large subunit
CPAR2_209090		0.0161583	0.999	46976	45913	-1.52913	3.87185e-09	10628	4087	0.943726	0.181627	6430	17648	0.773594	0.15709	5180	10047	orf19.681 (HAP43)
CPAR2_205950		0.205946	0.769594	5953	6680	1.5277	7.61398e-07	4765	15303	-0.0223985	0.968456	3928	5106	0.379763	0.634496	2274	3359	orf19.74 (SEC5)	SEC5	Essential 107kDa subunit of the exocyst complex (Sec3p, Sec5p, Sec6p, Sec8p, Sec10p, Sec15p, Exo70p, and Exo84p), which has the essential function of mediating polarized targeting of secretory vesicles to active sites of exocytosis
CPAR2_805890		-0.0171498	0.998689	8693	8344	1.52574	3.11035e-10	3762	12231	0.0097518	0.988516	4595	6133	0.0573119	0.892253	5005	6106	orf19.4066
CPAR2_500060		-0.873535	0.00441277	14504	7727	0.327895	0.536242	23078	31967	1.52545	0.0137268	14638	52426	0.39236	0.371509	9932	15259	orf19.3099 (TRP4)	TRP4	Anthranilate phosphoribosyl transferase of the tryptophan biosynthetic pathway, catalyzes the phosphoribosylation of anthranilate, subject to the general control system of amino acid biosynthesis
CPAR2_801430		-0.12715	0.99233	16686	14820	-1.52431	1.70771e-08	7554	2942	0.3605	0.574923	5004	8893	0.762666	0.176539	6027	11672	orf19.3753 (SEF1)	SEF1	Putative transcription factor, has homolog in Kluyveromyces lactis
CPAR2_202490		0.167174	0.99233	2033	2217	0.989965	0.0251236	1665	3711	1.52326	0.0170459	1529	6148	-0.46343	0.175086	19008	16338	orf19.4355
CPAR2_208700		-0.215791	0.881887	560	470	-0.208944	0.645162	569	554	1.52287	2.04215e-07	491	1905	0.443628	0.618572	604	933	orf19.2789
CPAR2_213130		-0.43251	0.533176	18194	13162	-0.417499	0.0758079	18176	15227	-1.52106	5.00502e-05	15403	7242	0.274663	0.54212	7403	10321	orf19.2057	YTA12	Component, with Afg3p, of the mitochondrial inner membrane m-AAA protease that mediates degradation of misfolded or unassembled proteins and is also required for correct assembly of mitochondrial enzyme complexes
CPAR2_301990		0.101449	0.958464	3727	3890	0.261671	0.315679	3354	4527	1.52044	0.00203789	2606	9753	-0.12127	0.80571	3857	4172	orf19.3841	ATG1	Protein ser/thr kinase required for vesicle formation in autophagy and the cytoplasm-to-vacuole targeting (Cvt) pathway; structurally required for phagophore assembly site formation; during autophagy forms a complex with Atg13p and Atg17p
CPAR2_201010		-0.035011	0.993547	1713	1629	-0.0855938	0.927966	3441	3602	1.52017	7.48385e-06	2027	7971	-1.08018	0.0130979	22335	12568	No C.albicans ortholog
CPAR2_203320		-0.00358788	0.999	17379	16859	0.728507	0.00805652	11727	21696	-1.51826	0.000249936	12800	5945	-0.20979	0.767341	20338	20879	orf19.556
CPAR2_202420		0.502904	0.517356	1454	2015	0.299536	0.402525	1629	2249	1.5177	0.000117317	1134	4515	0.209945	0.738665	2007	2677	orf19.473 (TPO4)	TPO4	Polyamine transport protein, recognizes spermine, putrescine, and spermidine; localizes to the plasma membrane; member of the major facilitator superfamily
CPAR2_300720		-0.546553	0.211112	7766	5191	-0.408451	0.049327	9151	7667	-1.51574	1.1522e-05	8482	3999	0.0338613	0.936682	4813	5742	orf19.2128	YLF2	Protein of unknown function, has weak similarity to E. coli GTP-binding protein gtp1; the authentic, non-tagged protein is detected in highly purified mitochondria in high-throughput studies
CPAR2_807550		-0.123259	0.804378	18709	16734	-0.260359	0.151393	14598	13643	-1.51315	5.84351e-06	13587	6456	0.0276704	0.943884	8180	9724	orf19.1661 (DBP5)	DBP5	Cytoplasmic ATP-dependent RNA helicase of the DEAD-box family; involved in mRNA export from the nucleus; involved in translation termination; ATP/ADP cycling is regulated by Gle1p and Nup159p
CPAR2_807580		0.226441	0.86795	1890	2145	0.6759	0.0037663	1464	2636	1.51179	0.00512988	1467	5611	-0.0474599	0.917171	5375	6067	orf19.5929
CPAR2_805130		0.788449	0.0290605	886	1486	1.51127	1.08165e-05	549	1751	0.83004	0.0933574	428	1059	0.381907	0.620615	266	401	orf19.5266
CPAR2_806650		-0.671998	0.642484	7744	4764	0.047072	0.927966	11982	13841	1.51092	0.0043052	9139	33227	0.799342	0.0278878	2571	5112	orf19.1375 (LEU42)
CPAR2_405630		-0.282962	0.313842	16258	12997	-0.500525	0.0143564	17216	13639	-1.50916	8.94137e-05	16632	7764	-0.26506	0.642236	26707	26417	orf19.5973 (PHB2)	PHB2	Subunit of the prohibitin complex (Phb1p-Phb2p), a 1.2 MDa ring-shaped inner mitochondrial membrane chaperone that stabilizes newly synthesized proteins; determinant of replicative life span; involved in mitochondrial segregation
CPAR2_204240		-0.357042	0.826376	28840	21828	-0.0694243	0.849293	23178	24557	-1.50901	5.00502e-05	22802	10642	-0.274883	0.629408	32174	31353	orf19.544.1 (PRE6)	PRE6	Alpha 4 subunit of the 20S proteasome; may replace alpha 3 subunit (Pre9p) under stress conditions to create a more active proteasomal isoform; GFP-fusion protein relocates from cytosol to the mitochondrial surface upon oxidative stress
CPAR2_701740		-0.0899349	0.993547	70222	63906	-0.466509	0.0216913	83860	68509	-1.50844	0.00059751	99807	47109	0.0280447	0.951787	28069	33183	orf19.6132
CPAR2_501560		0.310657	0.82653	5422	6523	-1.50631	3.20335e-05	4641	1825	-0.970014	0.206582	3617	2579	0.233841	0.821395	7533	10082	orf19.2649 (PCL1)	PCL1	Cyclin, interacts with cyclin-dependent kinase Pho85p; member of the Pcl1,2-like subfamily, involved in the regulation of polarized growth and morphogenesis and progression through the cell cycle; localizes to sites of polarized cell growth
CPAR2_700360		-0.374917	0.260029	41484	31111	-0.834309	0.000659342	45085	28452	-1.50624	0.0142987	49437	23323	-0.745225	0.282768	58649	41983	orf19.7215.3	HSP10	Mitochondrial matrix co-chaperonin that inhibits the ATPase activity of Hsp60p, a mitochondrial chaperonin; involved in protein folding and sorting in the mitochondria; 10 kD heat shock protein with similarity to E. coli groES
CPAR2_800170		-0.0993667	0.992929	4659	4256	-0.100368	0.830591	2774	2911	1.50602	4.97841e-06	2097	8101	0.130378	0.875299	4653	5780	orf19.2847	RPC82	RNA polymerase III subunit C82
CPAR2_406040		0.989995	0.536506	3051	5962	1.43966	1.22356e-22	10717	32606	1.506	0.000353545	27342	105944	0.598114	0.201359	1476	2621	orf19.3131 (OYE32)
CPAR2_701720		-0.0871432	0.992929	11995	10946	-0.55865	0.000235437	17345	13240	-1.50395	9.67589e-05	19132	9047	-0.167277	0.750597	9919	10341	orf19.6135.1 (SMX4)	LSM3	Lsm (Like Sm) protein; part of heteroheptameric complexes (Lsm2p-7p and either Lsm1p or 8p): cytoplasmic Lsm1p complex involved in mRNA decay; nuclear Lsm8p complex part of U6 snRNP and possibly involved in processing tRNA, snoRNA, and rRNA
CPAR2_301390		1.50244	0.271972	780	2142	0.74013	0.639045	1710	3198	1.09224	0.00260272	686	1991	0.0263005	0.955739	2935	3473	orf19.7093 (HGT13)
CPAR2_104660		0.132847	0.99233	2104	2248	-0.3075	0.27117	2682	2425	1.50107	3.0996e-06	1847	7182	0.248454	0.81158	2776	3736	orf19.5498 (EFH1)
CPAR2_104550		-0.378023	0.968946	101373	75465	-1.15636	0.000203072	65621	32230	-1.50077	0.00892791	56997	27315	-0.409056	0.457179	45090	39896	orf19.22
CPAR2_106290		-0.249046	0.983519	22218	18132	-0.553891	0.0702626	32535	24457	-1.49962	1.27094e-05	31065	14408	-0.150062	0.822791	13014	13625	orf19.3687	PFD1	Subunit of heterohexameric prefoldin, which binds cytosolic chaperonin and transfers target proteins to it; involved in the biogenesis of actin and of alpha- and gamma-tubulin
CPAR2_103950		0.0907685	0.985725	23536	24410	-0.456636	0.00348266	21537	17649	-1.49942	0.00130106	22097	10444	-0.395068	0.409369	52048	47040	orf19.4491 (ERG20)	ERG20	Farnesyl pyrophosphate synthetase, has both dimethylallyltranstransferase and geranyltranstransferase activities; catalyzes the formation of C15 farnesyl pyrophosphate units for isoprenoid and sterol biosynthesis
CPAR2_208110		0.0944911	0.993547	7422	7659	-0.407185	0.342725	4411	3677	1.49853	0.0269053	3065	10940	0.931062	0.0103949	1002	2236	orf19.4780
CPAR2_102010		-0.637391	0.575399	387	241	-1.06814	0.00361878	434	232	-1.49819	0.000566166	450	218	0.0957133	0.863646	2638	3233	No C.albicans ortholog
CPAR2_602060		0.0922914	0.921616	2395	2485	0.222502	0.327006	2192	2864	1.49782	9.76696e-05	1378	5329	-0.271386	0.624553	1522	1465	orf19.3405 (ZCF18)
CPAR2_703690		-0.0333492	0.996012	7042	6723	-0.0580673	0.935124	3680	3989	1.49776	0.00446044	3053	11838	-0.22693	0.600511	8114	8113	orf19.1335	MTR4	ATP-dependent 3'-5' RNA helicase of the DExD/H family; involved in nuclear RNA processing and degradation both as a component of the TRAMP complex and in TRAMP-independent processes; contains an arch domain, composed of two coiled-coil arms/stalks and a globular fist/KOW domain, that has RNA binding activity and is required for 5.8S rRNA processing
CPAR2_207990	SAM2	1.00209	2.90001e-09	99177	193634	1.49753	3.3651e-30	66452	210478	-1.18094	0.000627756	68901	40810	0.0311309	0.954542	91087	109522	orf19.657 (SAM2)	SAM2	S-adenosylmethionine synthetase, catalyzes transfer of the adenosyl group of ATP to the sulfur atom of methionine; one of two differentially regulated isozymes (Sam1p and Sam2p)
CPAR2_703360		0.242686	0.988023	86	99	1.49422	0.00427179	115	361	-0.685569	0.275932	113	93	-0.790637	0.234201	218	147	No C.albicans ortholog
CPAR2_702190		-0.44949	0.264134	10781	7689	-0.831356	7.70682e-07	14419	9099	-1.49203	0.00451796	13740	6442	-0.647557	0.429999	16204	12385	orf19.6406	SWS2	Putative mitochondrial ribosomal protein of the small subunit, has similarity to E. coli S13 ribosomal protein; participates in controlling sporulation efficiency
CPAR2_213780		-0.519746	0.120255	140455	95089	-0.664525	0.000291263	84873	59861	-1.49187	3.24467e-06	75579	35261	-0.464034	0.150049	257803	218167	orf19.2013 (KAR2)	KAR2	ATPase involved in protein import into the ER, also acts as a chaperone to mediate protein folding in the ER and may play a role in ER export of soluble proteins; regulates the unfolded protein response via interaction with Ire1p
CPAR2_700340		0.214199	0.972354	2648	2981	0.511046	0.100592	2551	4089	1.49165	1.58188e-05	2184	8314	-0.30804	0.593265	2769	2646	orf19.7214	YBR056W	Putative cytoplasmic protein of unknown function
CPAR2_211380		-0.104905	0.992929	47631	42924	-1.49126	1.36737e-05	34064	13967	-1.37328	NA	49267	26580	0.150443	0.802004	59370	75059	orf19.828	MRPL24	Mitochondrial ribosomal protein of the large subunit; two mitochondrial ribosomal proteins, YmL14 and YmL24, have been assigned to the same gene
CPAR2_703950		0.043252	0.996012	1162	1161	0.701591	0.15447	628	1155	1.49122	6.56942e-06	501	1918	-0.2513	0.696856	1410	1395	orf19.769 (IFE1)	BDH2	Putative medium-chain alcohol dehydrogenase with similarity to BDH1; transcription induced by constitutively active PDR1 and PDR3
CPAR2_210020		-0.373612	0.821105	10385	7838	-0.887742	6.90429e-06	9898	5989	-1.49054	0.00409146	8881	4241	-0.212138	0.690472	9174	9341	orf19.3532 (MRPL10)	MRPL10	Mitochondrial ribosomal protein of the large subunit; appears as two protein spots (YmL10 and YmL18) on two-dimensional SDS gels
CPAR2_802800	MET6	0.968402	0.0013692	52326	99987	1.49004	2.28239e-17	38153	120114	-0.778486	0.0385198	36015	28518	0.540374	0.0617192	21083	35196	orf19.2551 (MET6)	MET6	Cobalamin-independent methionine synthase, involved in methionine biosynthesis and regeneration; requires a minimum of two glutamates on the methyltetrahydrofolate substrate, similar to bacterial metE homologs
CPAR2_210410		1.48999	0.00440089	8530	23268	0.50535	0.132505	5901	9529	1.22765	0.00220356	6018	19872	-0.249456	0.758671	49231	46849	orf19.4445
CPAR2_100980		0.350458	0.187179	1596	1979	1.48961	3.23512e-17	1321	4180	-0.153309	0.753236	1474	1783	0.0656934	0.918513	1013	1243	orf19.3916
CPAR2_302290		0.00815084	0.999	14640	14287	-0.502335	0.00892331	8843	7035	-1.48949	0.000982984	8966	4315	-0.457689	0.307095	29644	25267	orf19.3843	SEC66	Non-essential subunit of Sec63 complex (Sec63p, Sec62p, Sec66p and Sec72p); with Sec61 complex, Kar2p/BiP and Lhs1p forms a channel competent for SRP-dependent and post-translational SRP-independent protein targeting and import into the ER
CPAR2_800900		0.0589971	0.993547	5311	5375	0.0646774	0.870576	6728	7874	-1.48918	0.000114444	6867	3269	-0.396925	0.267043	9372	8392	orf19.3267	SWF1	Palmitoyltransferase that acts on transmembrane proteins, including the SNAREs Snc1p, Syn8p, Tlg1p and likely all SNAREs; contains an Asp-His-His-Cys-cysteine rich (DHHC-CRD) domain; may have a role in vacuole fusion
CPAR2_702980		0.137632	0.927023	2147	2296	1.09763	0.00157262	2893	6932	1.48819	0.003655	1642	6150	0.372229	0.634496	715	1069	orf19.6518
CPAR2_601670		0.572727	0.484279	32138	46731	-0.993522	2.47503e-09	64224	36346	-1.48792	0.000189521	63107	30343	-0.352954	0.5543	18009	16215	orf19.5525	YMR315W	Protein with NADP(H) oxidoreductase activity; transcription is regulated by Stb5p in response to NADPH depletion induced by diamide; promoter contains a putative Stb5p binding site
CPAR2_804350		-0.358647	0.876478	18500	14120	-1.09814	1.51171e-06	23174	12006	-1.48718	6.94173e-05	20494	9846	0.0561476	0.903762	18073	21760	orf19.989	MRPS5	Mitochondrial ribosomal protein of the small subunit
CPAR2_803300		0.0450041	0.993547	2923	2945	0.00641709	0.993457	2075	2340	1.48632	2.63107e-05	1745	6630	-0.298026	0.588141	7728	7389	orf19.2320	RIO1	Essential serine kinase involved in cell cycle progression and processing of the 20S pre-rRNA into mature 18S rRNA
CPAR2_702450		-0.00530998	0.999	9642	9313	-0.451921	0.155544	9811	7984	-1.48586	6.19388e-06	8868	4152	-0.200209	0.687118	2737	2809	orf19.7190 (OGG1)	OGG1	Mitochondrial glycosylase/lyase that specifically excises 7,8-dihydro-8-oxoguanine residues located opposite cytosine or thymine residues in DNA, repairs oxidative damage to mitochondrial DNA, contributes to UVA resistance
CPAR2_502250		-0.15842	0.992929	10603	9266	-1.48578	0.000488682	10384	4111	0.830012	0.464367	8910	22939	-0.145653	0.778753	25943	27146	orf19.1287
CPAR2_703770		-0.481927	0.00520575	18338	12768	0.0211804	0.983637	40354	44797	1.48373	0.0117295	25168	89834	0.806935	0.324019	5069	10569	No C.albicans ortholog
CPAR2_806550		0.0912529	0.951319	3267	3391	0.66745	0.00523556	4780	8482	1.48175	0.0185951	4025	14512	0.192627	0.673103	4296	5634	orf19.3606	SNA4	Protein of unknown function, localized to the vacuolar outer membrane; predicted to be palmitoylated
CPAR2_802340		-0.384198	0.571018	7834	5864	-0.226832	0.602862	11452	10935	-1.48133	0.00464521	9848	4575	0.448224	0.620615	2239	3454	orf19.2415	MSE1	Mitochondrial glutamyl-tRNA synthetase, predicted to be palmitoylated
CPAR2_200550		0.00699456	0.99901	3082	3042	-0.160842	0.840957	2164	2181	1.48121	0.0378559	1772	6879	-0.0970436	0.804658	8436	9165	orf19.7599 (UTP5)	UTP5	Subunit of U3-containing Small Subunit (SSU) processome complex involved in production of 18S rRNA and assembly of small ribosomal subunit
CPAR2_700640		-0.153328	0.921616	2644	2310	-1.48099	2.28362e-11	3959	1594	-1.05303	5.06224e-05	3707	2411	0.0529699	0.937871	2072	2519	No C.albicans ortholog
CPAR2_202530		0.737402	0.323642	5391	8699	1.48033	1.4927e-13	4604	14370	0.520437	0.264196	3974	7761	0.628545	0.185051	1744	3088	orf19.4376
CPAR2_205450		-0.115388	0.992929	302	271	0.0726811	0.914641	245	290	1.48017	0.00897936	204	753	0.268855	0.70592	1397	1921	orf19.2366
CPAR2_701050		-0.0328984	0.992929	8523	8111	-0.238232	0.563463	15210	14497	1.48	0.000378152	12262	44450	0.168997	0.840715	6768	9068	orf19.5239	YNL040W	Putative protein of unknown function with strong similarity to alanyl-tRNA synthases from Eubacteria; green fluorescent protein (GFP)-fusion protein localizes to the cytoplasm; YNL040W is not an essential gene
CPAR2_205190		0.0837879	0.992929	1900	1953	-0.158417	0.629698	2009	2027	1.47983	0.00817904	2144	8113	-0.251864	0.624418	9094	9019	orf19.519	RRN10	Protein involved in promoting high level transcription of rDNA, subunit of UAF (upstream activation factor) for RNA polymerase I
CPAR2_701370		0.0648264	0.993547	25663	26027	-0.230841	0.367828	15526	14734	-1.4793	4.48585e-05	15970	7785	0.0395655	0.933596	2589	3101	orf19.7551 (ALO1)	ALO1	D-Arabinono-1,4-lactone oxidase, catalyzes the final step in biosynthesis of dehydro-D-arabinono-1,4-lactone, which is protective against oxidative stress
CPAR2_806110		-0.309279	0.946281	2390	1889	-0.00097883	0.998394	1579	1766	1.47926	0.000221835	1192	4583	0.0329511	0.948373	3527	4146	orf19.5884	URB2	Nucleolar protein required for normal metabolism of the rRNA primary transcript, proposed to be involved in ribosome biogenesis
CPAR2_213080		-0.0604256	0.992929	13283	12394	-0.76692	1.35691e-07	21187	13997	-1.47836	0.000872991	19720	9309	0.260381	0.634496	6430	8778	orf19.2062 (SOD4)
CPAR2_201090		0.323855	0.980219	46906	56662	-0.934097	0.000133678	36329	21634	-1.47607	0.0307469	44501	21650	-0.364219	0.574784	73253	67201	orf19.6612	CIR1	Mitochondrial protein that interacts with frataxin (Yfh1p); putative ortholog of mammalian electron transfer flavoprotein complex subunit ETF-beta; may have a role in oxidative stress response
CPAR2_406530		-0.0157635	0.998689	17629	16930	-0.0280154	0.952542	29068	31709	-1.47601	1.17246e-05	25648	12263	-0.304753	0.560588	13318	12743	orf19.2269	YNL010W	Putative protein of unknown function with similarity to phosphoserine phosphatases; green fluorescent protein (GFP)-fusion protein localizes to the cytoplasm and nucleus; homozygous diploid mutant shows an increase in glycogen accumulation
CPAR2_202170		-0.0466994	0.996266	6778	6427	-0.421643	0.485957	4249	3568	1.4759	0.0331766	3652	13767	-0.155445	0.697801	19967	20915	orf19.501	NOP2	Probable RNA m(5)C methyltransferase, essential for processing and maturation of 27S pre-rRNA and large ribosomal subunit biogenesis; localized to the nucleolus; constituent of 66S pre-ribosomal particles
CPAR2_603790		-0.0774913	0.993547	209	192	1.47483	7.94074e-06	263	814	1.10369	0.00306593	323	933	-0.0830916	0.946405	149	162	No C.albicans ortholog
CPAR2_601870		-0.0580308	0.992929	2088	1955	0.468963	0.23804	1608	2479	1.4748	0.00333959	1143	4414	0.433798	0.539862	786	1224	orf19.5580 (TEL1)	TEL1	Protein kinase primarily involved in telomere length regulation; contributes to cell cycle checkpoint control in response to DNA damage; functionally redundant with Mec1p; homolog of human ataxia-telangiectasia mutated (ATM) gene, the gene responsible for ataxia telangiectasia (AT) (OMIM 607585)
CPAR2_103710		-0.338604	0.0300005	9691	7467	0.23957	0.645162	7691	9999	1.47443	7.93315e-05	5570	20162	0.639169	0.303237	4386	7749	orf19.1828 (BUD16)	BUD16	Putative pyridoxal kinase, a key enzyme involved in pyridoxal 5'-phosphate synthesis, the active form of vitamin B6; required for genome integrity; involved in bud-site selection; similarity to yeast BUD17 and human pyridoxal kinase (PDXK)
CPAR2_807770		-0.468011	0.0543252	23374	16424	-1.18587	5.12595e-08	22236	11107	-1.47346	0.132643	28005	14020	0.148148	0.825119	44180	55837	orf19.6752	RSM10	Mitochondrial ribosomal protein of the small subunit, has similarity to E. coli S10 ribosomal protein; essential for viability, unlike most other mitoribosomal proteins
CPAR2_110310		-0.386577	0.885493	112578	84225	-1.29437	3.76168e-05	88062	40014	-1.47301	0.0174035	72119	34432	-0.166401	0.766425	124004	129049	orf19.3003.1 (RPL6)	RPL6B	Protein component of the large (60S) ribosomal subunit, has similarity to Rpl6Ap and to rat L6 ribosomal protein; binds to 5.8S rRNA
CPAR2_406240		-0.685949	0.624472	20489	12469	-0.071168	0.856904	24123	25946	1.47262	0.00249323	18376	64878	0.184424	0.682712	19889	26561	orf19.1613 (ILV2)	ILV2	Acetolactate synthase, catalyses the first common step in isoleucine and valine biosynthesis and is the target of several classes of inhibitors, localizes to the mitochondria; expression of the gene is under general amino acid control
CPAR2_213370		0.244032	0.93737	150	173	-0.0389935	0.971607	201	217	1.47177	0.00106606	126	478	0.190097	0.778753	414	546	orf19.2082 (SAP30)
CPAR2_801880		-0.378817	0.878821	101415	76240	-1.28286	2.98378e-09	73952	34115	-1.47144	0.0580212	68502	32974	-0.0206995	0.953105	169108	193869	orf19.4931.1 (RPL14)	RPL14B	Protein component of the large (60S) ribosomal subunit, nearly identical to Rpl14Ap and has similarity to rat L14 ribosomal protein
CPAR2_300300		0.0259417	0.999	5393	5388	0.360229	0.515443	2918	4220	1.46871	0.00430476	2458	9377	-0.102767	0.839002	10416	11166	orf19.7011	RRP12	Protein required for export of the ribosomal subunits; associates with the RNA components of the pre-ribosomes; has a role in nuclear import in association with Pse1p; contains HEAT-repeats
CPAR2_807540		-0.363808	0.693975	15393	11684	-0.51128	0.054337	19677	15425	-1.46753	0.000443922	19983	9646	-0.33895	0.618572	33706	31853	orf19.1662	MRP1	Mitochondrial ribosomal protein of the small subunit; MRP1 exhibits genetic interactions with PET122, encoding a COX3-specific translational activator, and with PET123, encoding a small subunit mitochondrial ribosomal protein
CPAR2_103350		0.0637876	0.993547	5955	6038	-1.46569	1.26963e-14	2826	1146	0.325869	0.668114	2392	4190	0.164264	0.720552	2601	3387	orf19.335
CPAR2_109500		0.503411	0.115509	4305	5931	1.46545	4.4449e-13	3657	11329	1.3774	0.00263534	3485	11966	0.365733	0.198344	1684	2527	orf19.6066	HFD1	Hexadecenal dehydrogenase; involved in the conversion of sphingosine 1-phosphate breakdown product hexadecenal to hexadecenoic acid; located in the mitochondrial outer membrane and also in lipid particles; has similarity to ALDH3A2, a human fatty aldehyde dehydrogenase (FALDH) mutated in Sjogren-Larsson syndrome, a neurocutaneous disorder
CPAR2_302140		0.712429	0.0607833	2556	4067	-0.764916	6.46522e-05	3664	2429	-0.731834	0.0143186	4467	3666	-1.46523	3.22887e-14	38027	15758	orf19.3829 (PHR1)
CPAR2_105160		0.0208945	0.998689	178738	176009	-0.0927693	0.815639	380052	399251	-1.46507	0.00166888	490663	230609	-0.437132	0.604014	92516	81384	orf19.5201.1
CPAR2_109280		-0.144618	0.992929	234567	205787	0.014716	0.972375	362158	411545	-1.4642	0.000417064	460914	222188	-0.0296995	0.960272	125575	142554	orf19.3340 (SOD2)	SOD2	Mitochondrial manganese superoxide dismutase, protects cells against oxygen toxicity; phosphorylated
CPAR2_303360		-0.510249	0.754447	14561	10010	-0.935454	3.66953e-11	14054	8238	-1.464	0.0234275	13152	6529	0.213375	0.700459	12893	17308	orf19.585	MRPL17	Mitochondrial ribosomal protein of the large subunit
CPAR2_500740		0.115154	0.992929	1976	2095	-0.145036	0.725026	1677	1701	1.46195	0.000154135	1357	5071	0.100376	0.88647	3070	3756	orf19.3821
CPAR2_200090		0.099583	0.992929	6436	6692	-0.3885	0.0432684	5412	4619	-1.4617	0.0018724	4605	2221	-0.103648	0.83015	7773	8472	orf19.7658 (RFC4)	RFC4	Subunit of heteropentameric Replication factor C (RF-C), which is a DNA binding protein and ATPase that acts as a clamp loader of the proliferating cell nuclear antigen (PCNA) processivity factor for DNA polymerases delta and epsilon
CPAR2_302730		0.0884644	0.982978	1792	1855	0.662062	0.0442122	1955	3454	1.46068	0.00347795	1471	5313	-0.0920119	0.833515	1630	1782	orf19.6681
CPAR2_802480		0.0234684	0.998689	658	654	0.00686476	0.993833	384	428	1.45933	0.00260068	357	1330	0.0276396	0.956629	1105	1308	orf19.7460	TRM13	2'-O-methyltransferase responsible for modification of tRNA at position 4; C-terminal domain has similarity to Rossmann-fold (RFM) superfamily of RNA methyltransferases
CPAR2_404190		0.14934	0.992929	4394	4743	0.39026	0.480205	4448	6412	1.45929	0.0026854	2667	10344	0.969977	0.419792	1809	4019	orf19.7436 (AAF1)
CPAR2_202000		0.233721	0.888538	4356	5002	0.866302	5.30749e-08	3357	6846	1.45781	0.000733913	2958	11211	-0.244512	0.468684	6551	6425	orf19.2623 (ECM22)
CPAR2_400020		-0.417151	0.754447	23438	17164	0.253768	0.417051	23064	30794	1.4576	0.0115373	17020	59267	0.39633	0.0494092	9590	14621	orf19.4704 (ARO1)	ARO1	Pentafunctional arom protein, catalyzes steps 2 through 6 in the biosynthesis of chorismate, which is a precursor to aromatic amino acids
CPAR2_210080		-0.0464458	0.998689	1642	1562	-0.387469	0.280197	4378	3766	-1.45693	0.0135938	2812	1346	0.232804	0.69509	919	1260	orf19.3526 (ITR1)	ITR2	Myo-inositol transporter with strong similarity to the major myo-inositol transporter Itr1p, member of the sugar transporter superfamily; expressed constitutively
CPAR2_806630		-0.0592358	0.992929	1363	1274	0.419066	0.0532859	2030	3048	1.45637	0.0010865	1726	6103	0.0187603	0.96451	2870	3407	No C.albicans ortholog
CPAR2_601340		0.0917024	0.992929	4392	4574	-0.00282172	0.996587	4189	4685	1.45543	0.000326656	3088	11553	-0.184753	0.634496	5271	5428	orf19.3463	LSG1	Putative GTPase involved in 60S ribosomal subunit biogenesis; required for the release of Nmd3p from 60S subunits in the cytoplasm
CPAR2_106960		0.0203081	0.993547	97859	96654	0.712826	8.2148e-07	59003	108455	-1.45512	0.000201605	61219	30004	-0.102167	0.800465	42262	46232	orf19.1064 (ACS2)	ACS2	Acetyl-coA synthetase isoform which, along with Acs1p, is the nuclear source of acetyl-coA for histone acetylation; mutants affect global transcription; required for growth on glucose; expressed under anaerobic conditions
CPAR2_407020		0.189447	0.992929	453	500	-1.45491	2.30801e-05	639	263	-1.37411	0.00410242	513	264	-0.622011	0.350736	984	763	orf19.4095
CPAR2_213180		0.204237	0.992929	1357	1541	1.05756	1.92856e-07	2036	4789	1.45483	1.75481e-06	1969	7188	-0.0856325	0.836185	3173	3489	orf19.2067	NFU1	Protein involved in iron metabolism in mitochondria; similar to NifU, which is a protein required for the maturation of the Fe/S clusters of nitrogenase in nitrogen-fixing bacteria
CPAR2_204780		-0.0747731	0.993547	4660	4330	-0.0857352	0.892476	3801	4025	1.45479	0.000550111	2907	10826	-0.209268	0.593265	9832	9953	orf19.706 (NMD3)	NMD3	Protein involved in nuclear export of the large ribosomal subunit; acts as a Crm1p-dependent adapter protein for export of nascent ribosomal subunits through the nuclear pore complex
CPAR2_402170		0.163843	0.958717	4654	5069	1.45162	3.83818e-08	3128	9593	0.667688	0.108722	2575	5695	0.337196	0.568974	3864	5588	orf19.5646	YPL034W	Putative protein of unknown function; YPL034W is not essential gene
CPAR2_406550		0.333308	0.789085	5567	6811	0.695258	7.62248e-06	6927	12603	1.45147	0.000408017	7172	26601	0.520509	0.150558	2889	4804	orf19.2262	ZTA1	NADPH-dependent quinone reductase, GFP-tagged protein localizes to the cytoplasm and nucleus; has similarity to E. coli quinone oxidoreductase and to human zeta-crystallin
CPAR2_601880		-0.386742	0.334307	703	524	0.671246	0.00758351	834	1493	1.44849	0.00321098	921	3299	0.285673	0.725111	649	910	orf19.3441 (FRP6)
CPAR2_402880		-0.397878	0.987174	11299	8269	-1.21286	6.02991e-07	908	441	1.44847	0.000145578	1025	3742	0.607348	0.0774243	1974	3483	orf19.5634 (FRP1)
CPAR2_600350		-0.507693	0.0364094	12175	8323	-0.347392	0.321362	17545	15374	-1.44724	0.00130482	19965	9537	0.188674	0.634496	7009	9201	orf19.1083	JLP2	Protein of unknown function, contains sequence that closely resembles a J domain (typified by the E. coli DnaJ protein)
CPAR2_202110		0.134205	0.987174	1827	1949	0.234352	0.621524	1920	2565	1.4457	0.0135923	1629	6022	-0.38743	0.567473	8485	7753	orf19.511	NRK1	Nicotinamide riboside kinase, catalyzes the phosphorylation of nicotinamide riboside and nicotinic acid riboside in salvage pathways for NAD+ biosynthesis
CPAR2_801620		0.528099	0.286598	2880	4037	0.559713	0.0120138	2681	4448	1.44523	8.47525e-08	2038	7421	-0.079272	0.860215	2664	2961	No C.albicans ortholog
CPAR2_807000		-1.38013	2.43252e-36	13766	5145	-1.27687	5.69341e-08	15811	7263	-1.44393	0.00166888	7170	3398	-1.37223	6.7124e-07	5974	2720	No C.albicans ortholog
CPAR2_405940		0.215172	0.99233	6692	7598	-0.310503	0.667831	3302	2998	1.44366	0.0445834	2706	10120	-0.407454	0.517087	14829	13167	orf19.4093 (PES1)	NOP7	Component of several different pre-ribosomal particles; forms a complex with Ytm1p and Erb1p that is required for maturation of the large ribosomal subunit; required for exit from G<sub>0</sub> and the initiation of cell proliferation
CPAR2_210850		0.0383353	0.993547	719	721	-0.156739	0.829575	737	734	1.44337	0.00273973	634	2343	-0.473821	0.386527	3244	2775	orf19.1557	RKM5	Protein lysine methyltransferase; monomethylates Lys-46 of the ribosomal large subunit Rpl1a/Rpl1b; member of the seven beta-strand methyltransferase superfamily; orthologs only found among fungal species
CPAR2_209250		-0.282639	0.709787	26168	20975	-0.497993	0.015024	36536	28960	-1.44293	2.15325e-07	37563	18659	0.097387	0.81158	16771	20785	orf19.3577 (COQ5)	COQ5	2-hexaprenyl-6-methoxy-1,4-benzoquinone methyltransferase, involved in ubiquinone (Coenzyme Q) biosynthesis; localizes to the matrix face of the mitochondrial inner membrane in a large complex with other ubiquinone biosynthetic enzymes
CPAR2_601830		-0.304164	0.928023	39196	30992	-1.33871	4.35408e-05	27181	12050	-1.44175	0.0971041	25687	12493	-0.664148	0.335978	80342	60830	orf19.3504 (RPL23A)	RPL23B	Protein component of the large (60S) ribosomal subunit, identical to Rpl23Ap and has similarity to E. coli L14 and rat L23 ribosomal proteins
CPAR2_502470		0.103784	0.992929	14736	15379	-0.286832	0.309554	22862	21121	-1.44106	0.00023981	28322	14006	0.0366989	0.917171	9120	10864	orf19.4248	YLR118C	Acyl-protein thioesterase responsible for depalmitoylation of Gpa1p; green fluorescent protein (GFP)-fusion protein localizes to both the cytoplasm and nucleus and is induced in response to the DNA-damaging agent MMS
CPAR2_401500		0.476675	0.323642	1589	2159	-0.0167455	0.976419	2655	2931	1.44037	0.000200077	2162	8038	0.590003	0.324019	882	1543	orf19.2691
CPAR2_212740	MET7	-0.00871223	0.999	7028	6809	0.150158	0.584484	5636	7023	1.43968	0.00167463	5077	17890	0.285234	0.519388	7076	10039	orf19.4516	MET7	Folylpolyglutamate synthetase, catalyzes extension of the glutamate chains of the folate coenzymes, required for methionine synthesis and for maintenance of mitochondrial DNA
CPAR2_203040		-0.470547	0.286598	70382	49579	-0.494705	0.0149705	56842	45262	-1.43679	0.000146757	52600	26190	0.0918369	0.789614	25723	31919	orf19.717 (HSP60)	HSP60	Tetradecameric mitochondrial chaperonin required for ATP-dependent folding of precursor polypeptides and complex assembly; prevents aggregation and mediates protein refolding after heat shock; role in mtDNA transmission; phosphorylated
CPAR2_101730		0.00376621	0.999	4021	3934	0.0438348	0.907867	4424	5105	1.43669	7.4048e-05	3125	11496	0.102238	0.866091	2864	3582	orf19.4225 (LEU3)	LEU3	Zinc-knuckle transcription factor, repressor and activator; regulates genes involved in branched chain amino acid biosynthesis and ammonia assimilation; acts as a repressor in leucine-replete conditions and as an activator in the presence of alpha-isopropylmalate, an intermediate in leucine biosynthesis that accumulates during leucine starvation
CPAR2_205420		0.014229	0.994923	1568	1542	0.0813785	0.919161	867	1025	1.4364	0.00891844	622	2371	0.214825	0.836185	1125	1503	orf19.2368	LIN1	Non-essential component of U5 snRNP; nuclear protein; physically interacts with Irr1p of cohesin complex; may link together proteins involved in chromosome segregation, mRNA splicing and DNA replication
CPAR2_106610		-0.260404	0.888314	15755	12852	-0.654817	0.0184566	17996	12751	-1.43493	0.000909356	15536	7688	-0.403866	0.53243	20986	18848	orf19.2953 (TOM20)	TOM20	Component of the TOM (translocase of outer membrane) complex responsible for recognition and initial import steps for all mitochondrially directed proteins; acts as a receptor for incoming precursor proteins
CPAR2_406500		-0.452078	0.742274	16572	11860	-0.905984	0.000261211	16350	9711	-1.43438	0.0134654	14421	7198	0.031931	0.943768	14435	17277	orf19.2275	MNP1	Protein associated with the mitochondrial nucleoid; putative mitochondrial ribosomal protein with similarity to E. coli L7/L12 ribosomal protein; required for normal respiratory growth
CPAR2_107100		0.0448238	0.996878	407293	406870	-0.403529	0.0304296	502853	429408	-1.43424	0.00155535	565136	273538	-0.110077	0.856235	402488	433792	orf19.1051 (HTA2)	HTA1	Histone H2A, core histone protein required for chromatin assembly and chromosome function; one of two nearly identical subtypes (see also HTA2); DNA damage-dependent phosphorylation by Mec1p facilitates DNA repair; acetylated by Nat4p
CPAR2_700930		0.0494559	0.993547	3666	3701	0.429139	0.19497	2830	4240	1.4331	0.00764492	2002	7652	0.276597	0.765295	1404	1934	orf19.4776 (LYS143)	LYS14	Transcriptional activator involved in regulation of genes of the lysine biosynthesis pathway; requires 2-aminoadipate semialdehyde as co-inducer
CPAR2_209260		-0.15862	0.863798	7001	6108	-0.206528	0.452026	6272	6098	1.43303	0.00207169	5807	20409	-0.00602396	0.992281	13930	16301	orf19.825 (GCD7)	GCD7	Beta subunit of the translation initiation factor eIF2B, the guanine-nucleotide exchange factor for eIF2; activity subsequently regulated by phosphorylated eIF2; first identified as a negative regulator of GCN4 expression
CPAR2_203230		-0.333535	0.130822	3412	2639	-0.201889	0.706331	2834	2738	-1.43281	1.8777e-05	2584	1293	-0.419801	0.604649	3264	2942	orf19.1852	AIM19	Putative protein of unknown function; the authentic, non-tagged protein is detected in purified mitochondria in high-throughput studies; null mutant displays reduced respiratory growth
CPAR2_203410		-0.524845	0.441126	8405	5708	-0.685943	0.00484027	7805	5411	-1.43259	0.0129904	7363	3716	-0.203366	0.666319	11445	11739	orf19.639.1	MRPL44	Mitochondrial ribosomal protein of the large subunit
CPAR2_701010		-0.298532	0.789085	8807	6977	-1.0458	1.12732e-06	8492	4617	-1.43166	0.127472	8672	4363	-0.329938	0.479266	15381	14449	orf19.5235	MRPL13	Mitochondrial ribosomal protein of the large subunit, not essential for mitochondrial translation
CPAR2_603350		0.484834	0.220895	15724	21411	-0.754757	0.245047	21976	14692	1.43042	0.00021558	16604	59702	-0.450074	0.398894	18725	16301	orf19.6322 (ARD)
CPAR2_203180		-0.0738143	0.958015	5865	5429	-0.441212	0.16582	6072	4994	-1.43002	1.33805e-08	5351	2667	-0.0674498	0.912067	3817	4326	orf19.1857
CPAR2_102500		-0.042982	0.994923	7457	7009	-0.600042	0.000470702	7351	5456	-1.42797	0.000251231	7489	3757	-0.18737	0.690472	6726	6929	orf19.297 (DTD2)	DTD1	D-Tyr-tRNA(Tyr) deacylase, functions in protein translation, may affect nonsense suppression via alteration of the protein synthesis machinery; ubiquitous among eukaryotes
CPAR2_213240		-0.431041	0.841358	130	94	0.57177	0.356883	108	181	1.42755	0.00944514	114	405	0.699881	0.586115	95	177	No C.albicans ortholog
CPAR2_201660		0.0566646	0.993547	8297	8437	-0.180432	0.737217	6073	6048	1.42581	0.00740385	5235	19157	-0.0620342	0.874312	17789	19742	orf19.6355	RRB1	Essential nuclear protein involved in early steps of ribosome biogenesis; physically interacts with the ribosomal protein Rpl3p
CPAR2_106170		-0.24392	0.863798	8572	7068	0.122982	0.822635	11957	14668	-1.42519	0.00306662	12204	5860	0.15912	0.664528	2567	3350	orf19.3675 (GAL7)	GAL7	Galactose-1-phosphate uridyl transferase, synthesizes glucose-1-phosphate and UDP-galactose from UDP-D-glucose and alpha-D-galactose-1-phosphate in the second step of galactose catabolism
CPAR2_704360		-0.175175	0.992929	162	139	-1.42421	0.00261418	293	124	-0.755853	0.315952	217	174	-0.249647	0.855433	155	151	No C.albicans ortholog
CPAR2_110280		-0.0638259	0.985725	4285	3993	-0.138415	0.620891	5931	6040	-1.42352	0.000164606	7381	3645	-0.0307731	0.963942	5093	5860	orf19.3001 (TEM1)	TEM1	GTP-binding protein of the ras superfamily involved in termination of M-phase; controls actomyosin and septin dynamics during cytokinesis
CPAR2_807910		0.480777	0.436541	701	956	1.17864	2.49905e-08	817	2071	1.42325	0.00683214	705	2488	0.208431	0.748188	833	1102	orf19.5121 (OPT5)
CPAR2_600660		-0.429305	0.840639	7329	5330	-0.522475	0.0604282	16711	12963	1.42305	4.31097e-05	12374	44009	0.0324036	0.957693	9869	11707	orf19.5572
CPAR2_500540		0.429735	0.789085	13717	18066	1.42291	0.000306972	15873	47296	1.39911	0.0109511	9970	33278	0.93675	0.000369453	3155	6937	orf19.1235 (HOM3)	HOM3	Aspartate kinase (L-aspartate 4-P-transferase); cytoplasmic enzyme that catalyzes the first step in the common pathway for methionine and threonine biosynthesis; expression regulated by Gcn4p and the general control of amino acid synthesis
CPAR2_214120		0.0124909	0.998689	1221	1202	0.093789	0.844602	1188	1436	1.4218	0.00105815	1085	3798	-0.130708	0.850413	1625	1767	orf19.1458	TAD2	Subunit of tRNA-specific adenosine-34 deaminase, forms a heterodimer with Tad3p that converts adenosine to inosine at the wobble position of several tRNAs
CPAR2_300330		0.410731	0.0580848	18024	23335	1.42054	4.61482e-14	16020	47704	0.663384	0.183008	13336	28697	-0.0667488	0.876332	17854	19636	orf19.7006	MSC3	Protein of unknown function, green fluorescent protein (GFP)-fusion protein localizes to the cell periphery; msc3 mutants are defective in directing meiotic recombination events to homologous chromatids; potential Cdc28p substrate
CPAR2_406150		-0.409372	0.869408	116108	85561	-1.11683	9.33861e-05	74850	38712	-1.41939	0.040048	66334	32995	-0.138447	0.78415	82303	87676	orf19.1601 (RPL3)	RPL3	Protein component of the large (60S) ribosomal subunit, has similarity to E. coli L3 and rat L3 ribosomal proteins; involved in the replication and maintenance of killer double stranded RNA virus
CPAR2_210710	BNA3	1.41859	1.75142e-25	7886	20561	1.38165	8.86808e-10	7039	20522	0.507172	0.13197	7087	13729	0.0617201	0.883583	3824	4696	orf19.5809	BNA3	Kynurenine aminotransferase, catalyzes formation of kynurenic acid from kynurenine; potential Cdc28p substrate
CPAR2_802790		0.187937	0.794062	21794	24144	0.0234285	0.943681	26385	30019	-1.41656	2.484e-05	20688	10134	-0.493925	0.0698788	17310	14531	orf19.2555 (URA5)	URA5	Major orotate phosphoribosyltransferase (OPRTase) isozyme that catalyzes the fifth enzymatic step in de novo biosynthesis of pyrimidines, converting orotate into orotidine-5'-phosphate; minor OPRTase encoded by URA10
CPAR2_213040		-0.444733	0.64139	13513	9703	-0.375527	0.0867296	16725	14393	-1.41649	7.48385e-06	15978	7968	-0.0838083	0.87495	10610	11772	orf19.2039 (MSF1)	MSF1	Mitochondrial phenylalanyl-tRNA synthetase, active as a monomer, unlike the cytoplasmic subunit which is active as a dimer complexed to a beta subunit dimer; similar to the alpha subunit of E. coli phenylalanyl-tRNA synthetase
CPAR2_704110		-0.245332	0.668789	96559	79118	-0.335269	0.0758836	55006	48740	-1.41605	1.05567e-06	44549	22259	-0.209301	0.588141	45625	45755	orf19.5130 (PDI1)	PDI1	Protein disulfide isomerase; multifunctional protein resident in the endoplasmic reticulum lumen, essential for the formation of disulfide bonds in secretory and cell-surface proteins, unscrambles non-native disulfide bonds; forms a complex with Mnl1p that has exomannosidase activity, processing unfolded protein-bound Man8GlcNAc2 oligosaccharides to Man7GlcNAc2 which promotes degradation in the u…
CPAR2_210770		-0.472841	0.650141	4392	3094	-1.0049	1.8663e-08	4639	2605	-1.41567	0.0797823	5460	2782	-0.415561	0.346796	8701	7667	orf19.1545	MRPS8	Mitochondrial ribosomal protein of the small subunit
CPAR2_803580		-0.0559673	0.994923	6888	6493	-0.0566551	0.938041	3127	3378	1.41387	0.0159605	2869	10390	0.0729053	0.860788	15161	18453	orf19.1839 (RPA190)	RPA190	RNA polymerase I largest subunit A190
CPAR2_700510		-0.0628132	0.992929	19732	18415	-0.973978	0.00015276	15649	8913	-1.41358	0.00138717	13484	6902	-0.22097	0.593265	17327	17307	orf19.7238 (NPL3)	NPL3	RNA-binding protein that promotes elongation, regulates termination, and carries poly(A) mRNA from nucleus to cytoplasm; has a role in repressing translation initiation by binding eIF4G; required for pre-mRNA splicing; dissociation from mRNAs promoted by Mtr10p; phosphorylated by Sky1p in the cytoplasm
CPAR2_208740		0.0992576	0.993547	408820	423562	-0.0785671	0.847322	251523	270056	-1.41291	0.00456696	315713	158875	-0.118511	0.850413	194567	208524	orf19.2785 (ATP7)	ATP7	Subunit d of the stator stalk of mitochondrial F1F0 ATP synthase, which is a large, evolutionarily conserved enzyme complex required for ATP synthesis
CPAR2_406080		-0.00430661	0.999	31704	30598	-0.666656	0.0409929	40306	29141	-1.41008	0.0389818	42854	21061	-0.163453	0.811086	40361	42095	orf19.1394	YCR090C	Putative protein of unknown function; green fluorescent protein (GFP)-fusion protein localizes to the cytoplasm and nucleus; YCR090C is not an essential gene
CPAR2_402180		0.00712153	0.999	33589	32762	-0.604529	0.00224125	15896	11791	-1.40952	0.0256194	16201	8263	-0.285881	0.386527	66201	63363	orf19.5647 (SUB2)	SUB2	Component of the TREX complex required for nuclear mRNA export; member of the DEAD-box RNA helicase superfamily and is involved in early and late steps of spliceosome assembly; homolog of the human splicing factor hUAP56
CPAR2_603100		0.00948102	0.999	6316	6230	-1.406	3.30883e-09	15113	6442	0.526637	0.384024	16798	34617	0.290143	0.748701	2241	3159	orf19.3643
CPAR2_503960		0.0315651	0.993547	1015	1011	0.100446	0.82691	1052	1250	1.4056	9.41723e-05	740	2614	0.539674	0.489091	943	1551	orf19.5432 (TPT1)	TPT1	tRNA 2'-phosphotransferase, catalyzes the final step in yeast tRNA splicing: the transfer of the 2'-PO(4) from the splice junction to NAD(+) to form ADP-ribose 1''-2''cyclic phosphate and nicotinamide
CPAR2_800060		-0.372671	0.680352	5633	4227	-0.107274	0.856652	4971	5178	-1.40407	0.00233085	4980	2468	-0.379779	0.621562	3709	3382	No C.albicans ortholog
CPAR2_602420		0.434818	0.77266	8705	11504	0.129184	0.837099	4542	5542	1.40194	0.00336526	3762	14091	0.233203	0.747676	1751	2355	orf19.3439
CPAR2_300600		-0.317869	0.930863	794	622	0.251428	0.74117	1203	1621	-0.950266	0.144094	1331	911	-1.40092	9.50472e-07	717	318	No C.albicans ortholog
CPAR2_806330		-0.183671	0.992929	30871	26368	-0.284492	0.295272	55244	50148	-1.40083	0.000192137	54866	27329	-0.4885	0.457179	48848	40607	orf19.1360.1
CPAR2_214070		-0.150476	0.992929	31637	27655	-0.376207	0.0763134	42550	36985	-1.39697	0.001622	52361	26363	-0.288084	0.685045	23178	22262	orf19.1448.1	DYN2	Cytoplasmic light chain dynein, microtubule motor protein; proposed to be involved in the assembly of the nuclear pore complex
CPAR2_701300		-0.242819	0.800795	7323	6013	-0.504791	0.0418921	7090	5572	-1.39556	2.12035e-05	5819	2916	-0.170228	0.825119	1458	1538	No C.albicans ortholog
CPAR2_805320		-0.332159	0.115509	5270	4075	-0.378965	0.137163	5888	5068	-1.39533	2.16579e-05	5383	2773	0.030797	0.935616	3187	3784	orf19.6533 (MSK1)	MSK1	Mitochondrial lysine-tRNA synthetase, required for import of both aminoacylated and deacylated forms of tRNA(Lys) into mitochondria and for aminoacylation of mitochondrially encoded tRNA(Lys)
CPAR2_100510		-1.18235	0.0937419	172	74	-0.918542	0.0894137	194	115	1.39414	0.00848024	170	612	0.0886452	0.867819	1167	1438	orf19.1976 (TRX2)
CPAR2_804740		0.429117	0.00517765	170894	224055	1.1874	3.13092e-15	116174	296690	-1.39406	2.88641e-09	111369	57017	0.195199	0.634496	25238	33586	orf19.5112 (TKL1)	TKL1	Transketolase, similar to Tkl2p; catalyzes conversion of xylulose-5-phosphate and ribose-5-phosphate to sedoheptulose-7-phosphate and glyceraldehyde-3-phosphate in the pentose phosphate pathway; needed for synthesis of aromatic amino acids
CPAR2_601150		-0.00967264	0.999	726	705	-0.323058	0.473205	674	601	1.39329	0.00306798	526	1940	-0.749347	0.154018	1700	1181	No C.albicans ortholog
CPAR2_802920		-0.324682	0.754758	8194	6391	-0.700317	2.58291e-06	6715	4638	-1.39318	0.0316381	6141	3218	0.12724	0.795793	4496	5665	orf19.2520	MRPS28	Mitochondrial ribosomal protein of the small subunit
CPAR2_206380		-0.0200683	0.999	7253	7003	-0.251916	0.608609	3855	3654	1.39311	0.00872482	3056	10946	-0.192479	0.739306	17933	18373	orf19.1578	RRP5	RNA binding protein with preference for single stranded tracts of U's involved in synthesis of both 18S and 5.8S rRNAs; component of both the ribosomal small subunit (SSU) processosome and the 90S preribosome
CPAR2_404670		0.467959	0.694609	12738	17074	0.0101492	0.983325	6625	7523	-1.39286	0.0121048	6207	3182	-0.172437	0.604324	13080	13585	orf19.201
CPAR2_802980		0.432258	0.475523	682	895	1.0138	0.000914597	482	1104	1.39192	0.000153143	410	1454	0.915595	0.664528	70	149	No C.albicans ortholog
CPAR2_807360		-0.0232225	0.994923	7239	6950	0.375042	0.162945	7796	11310	1.39011	8.38498e-06	6265	22158	0.186912	0.537998	8564	11350	orf19.6968	YDL073W	Putative protein of unknown function; YDL073W is not an essential gene
CPAR2_503410		0.29463	0.0847127	4800	5735	1.39008	4.65471e-11	4207	12380	1.16264	4.02939e-05	3433	10428	0.436482	0.604649	3520	5378	orf19.5416 (ESA1)	ESA1	Catalytic subunit of the histone acetyltransferase complex (NuA4) that acetylates four conserved internal lysines of histone H4 N-terminal tail; required for cell cycle progression and transcriptional silencing at the rDNA locus
CPAR2_403890		-0.122908	0.992929	880	788	0.393843	0.24198	1061	1550	1.38871	1.15399e-05	998	3440	-0.00189113	0.997466	1354	1572	No C.albicans ortholog
CPAR2_602650		0.331069	0.341216	9059	11120	1.38836	5.25137e-18	9759	28417	-0.329116	0.274061	9876	10486	0.0442832	0.925736	3202	3854	orf19.3445 (HOC1)	HOC1	Alpha-1,6-mannosyltransferase involved in cell wall mannan biosynthesis; subunit of a Golgi-localized complex that also contains Anp1p, Mnn9p, Mnn11p, and Mnn10p; identified as a suppressor of a cell lysis sensitive pkc1-371 allele
CPAR2_502040		-0.117301	0.992929	10331	9247	-0.691524	1.39277e-06	8684	6036	-1.38755	0.00630479	9674	4975	-0.175185	0.6807	15093	15568	orf19.2639.1	LSM7	Lsm (Like Sm) protein; part of heteroheptameric complexes (Lsm2p-7p and either Lsm1p or 8p): cytoplasmic Lsm1p complex involved in mRNA decay; nuclear Lsm8p complex part of U6 snRNP and possibly involved in processing tRNA, snoRNA, and rRNA
CPAR2_213300		-0.0354857	0.996266	1186	1123	-0.491109	0.0669417	1110	889	-1.38692	0.000107002	1212	616	0.0826794	0.88647	1052	1295	orf19.2079 (PHHB)	YHL018W	Putative protein of unknown function; green fluorescent protein (GFP)-fusion protein localizes to mitochondria and is induced in response to the DNA-damaging agent MMS
CPAR2_400050		0.367763	0.737113	1956	2453	0.342976	0.206274	1565	2212	1.3868	1.37294e-06	1379	4836	0.285387	0.604649	820	1158	orf19.4680
CPAR2_801580		0.0691963	0.992929	1153	1181	0.229669	0.296842	2200	2888	1.38543	1.6028e-06	2258	7916	-0.0496266	0.904322	2248	2542	orf19.4757 (NAR1)	NAR1	Component of the cytosolic iron-sulfur (FeS) protein assembly machinery, required for maturation of cytosolic and nuclear FeS proteins and for normal resistance to oxidative stress; homologous to human Narf
CPAR2_801120		0.632328	0.46839	6457	9780	0.703983	0.000966496	11576	21303	1.38537	0.0289178	14448	50651	-0.325071	0.394824	39061	36523	orf19.2825	DRE2	Conserved component of an early step in the cytosolic Fe-S protein assembly (CIA) machinery; contains an Fe-S cluster that receives electrons from NADPH via the action of Tah18p; ortholog of human Ciapin1
CPAR2_109350		-0.154059	0.971636	24762	21653	-1.08573	2.22821e-05	35775	19178	-1.38508	0.145156	44636	23490	-0.0646225	0.879179	80229	88763	orf19.3348	MRPL23	Mitochondrial ribosomal protein of the large subunit
CPAR2_405920		-0.276674	0.849567	15407	12370	-0.375023	0.110409	26158	22382	-1.38392	1.14404e-05	26695	13635	-0.29716	0.69979	17754	16927	orf19.4090.1	VMA21	Integral membrane protein that is required for vacuolar H+-ATPase (V-ATPase) function, although not an actual component of the V-ATPase complex; functions in the assembly of the V-ATPase; localized to the yeast endoplasmic reticulum (ER)
CPAR2_204490		0.409596	0.0711461	26953	34904	1.29011	2.07712e-08	28603	78601	-1.38285	1.83673e-07	32178	16566	-0.181295	0.746725	9809	10217	orf19.3518	ODC1	Mitochondrial inner membrane transporter, exports 2-oxoadipate and 2-oxoglutarate from the mitochondrial matrix to the cytosol for lysine and glutamate biosynthesis and lysine catabolism; suppresses, in multicopy, an fmc1 null mutation
CPAR2_803890		0.432235	0.464294	17564	22997	0.705295	2.92881e-07	19157	35015	1.29922	0.00115509	13832	44388	1.38049	4.88862e-10	2093	6335	orf19.4833 (MLS1)	MLS1	Malate synthase, enzyme of the glyoxylate cycle, involved in utilization of non-fermentable carbon sources; expression is subject to carbon catabolite repression; localizes in peroxisomes during growth in oleic acid medium
CPAR2_201540		0.159176	0.992929	941	1028	1.38046	4.39064e-12	3167	9258	-0.409836	0.451854	2424	2400	-0.0853717	0.874312	1281	1402	orf19.5005 (OSM2)	OSM1	Fumarate reductase, catalyzes the reduction of fumarate to succinate, required for the reoxidation of intracellular NADH under anaerobic conditions; mutations cause osmotic sensitivity
CPAR2_700440		0.360717	0.98911	451	560	1.38031	2.30773e-07	586	1699	-0.299193	0.586428	549	603	-0.191168	0.836185	431	454	No C.albicans ortholog
CPAR2_704130		-0.292598	0.469415	3745	2983	0.759786	0.000118706	2932	5563	1.38015	0.00184896	2308	7854	0.225911	0.661227	1521	2068	orf19.5133 (ZCF29)
CPAR2_101970		-0.0369914	0.993547	11526	10919	-0.710588	0.00229696	16677	11534	-1.37987	0.00666452	18614	9724	0.190012	0.683062	15784	20796	orf19.158	APD1	Protein of unknown function, required for normal localization of actin patches and for normal tolerance of sodium ions and hydrogen peroxide; localizes to both cytoplasm and nucleus
CPAR2_101170		1.37954	0.667197	475	1223	1.28827	4.63554e-08	8970	24493	0.295947	0.641324	9297	14770	1.09283	0.379698	73	184	orf19.3954.1
CPAR2_405850		0.354268	0.150133	3175	3947	0.438907	0.106743	1480	2257	1.37906	0.000958976	1260	4548	0.0353452	0.950661	2287	2713	orf19.1748
CPAR2_500660		-0.0987193	0.98911	1003	912	0.288998	0.574458	1127	1520	1.37887	0.00125135	754	2676	0.57289	0.634496	934	1545	No C.albicans ortholog
CPAR2_400520		0.18104	0.98911	33985	37328	0.0675235	0.83665	35882	42319	-1.37834	0.00200363	38744	19884	0.0977293	0.857556	23884	29365	orf19.4597	CAP2	Beta subunit of the capping protein (CP) heterodimer (Cap1p and Cap2p) which binds to the barbed ends of actin filaments preventing further polymerization; localized predominantly to cortical actin patches
CPAR2_601570		-0.367966	0.888314	21244	16108	0.329555	0.252116	16013	22545	1.37723	0.00229083	12386	41706	0.465864	0.378487	5394	8578	orf19.2138 (ILS1)	ILS1	Cytoplasmic isoleucine-tRNA synthetase, target of the G1-specific inhibitor reveromycin A
CPAR2_107280		0.0664359	0.992929	8884	9052	-1.37718	5.8839e-16	5220	2242	0.404214	0.497303	4940	9042	0.156959	0.765006	3805	4904	orf19.2454 (PHO87)	PHO87	Low-affinity inorganic phosphate (Pi) transporter, involved in activation of PHO pathway; expression is independent of Pi concentration and Pho4p activity; contains 12 membrane-spanning segments
CPAR2_300360		-0.282998	0.548858	38084	30533	-0.297319	0.62454	133271	117652	-1.37671	0.00470508	108013	53821	-0.314816	0.570173	46427	43987	orf19.6898.1
CPAR2_500800		0.0799235	0.993547	3972	4115	0.0219007	0.982257	4650	5326	1.37605	0.00310899	4202	14815	-0.332379	0.593265	14328	13440	orf19.1791	MAK11	Protein involved in an early, nucleolar step of 60S ribosomal subunit biogenesis; essential for cell growth and replication of killer M1 dsRNA virus; contains four beta-transducin repeats
CPAR2_809050		0.127321	0.869408	2060	2190	0.556018	0.124316	1290	2131	1.37448	0.000676883	1219	4437	0.435058	0.201359	1032	1613	orf19.6760 (MDS3)	MDS3	Putative component of the TOR regulatory pathway; negative regulator of early meiotic gene expression; required, with Pmd1p, for growth under alkaline conditions; has an N-terminal kelch-like domain
CPAR2_700390		0.279442	0.820855	2025	2396	0.0956803	0.811087	3169	3821	1.37344	1.68801e-05	3128	11086	-0.11276	0.844306	1305	1398	orf19.7257	MLH3	Protein involved in DNA mismatch repair and crossing-over during meiotic recombination; forms a complex with Mlh1p; mammalian homolog is implicated mammalian microsatellite instability
CPAR2_703940		0.489003	0.830959	22630	30745	1.03394	1.64956e-07	20886	47803	1.37328	0.000920119	20484	70962	0.413195	0.48175	2776	4359	orf19.7196	PRB1	Vacuolar proteinase B (yscB), a serine protease of the subtilisin family; involved in protein degradation in the vacuole and required for full protein degradation during sporulation; activity inhibited by Pbi2p
CPAR2_600310		-0.0908719	0.992929	22364	20526	0.118139	0.794461	69811	86073	-1.3722	0.00395537	85933	44302	-0.348047	0.620615	67999	62185	orf19.5547
CPAR2_700840		-0.119947	0.993547	157	140	1.02988	0.00437741	282	642	1.37212	0.00600526	223	806	0.445656	0.618572	411	631	orf19.4872
CPAR2_407870		0.942176	0.493576	1324	2459	0.999785	0.076034	2663	5902	-1.37194	0.00879241	1974	1025	-0.594588	0.479266	1909	1506	No C.albicans ortholog
CPAR2_700180		-0.841708	0.0627451	9190	5009	0.347418	0.315679	8992	12787	-1.37039	2.56884e-06	5664	2968	-0.900473	1.90481e-06	3099	1938	orf19.7263	YFR006W	Putative X-Pro aminopeptidase; green fluorescent protein (GFP)-fusion protein localizes to the cytoplasm; YFR006W is not an essential gene
CPAR2_110240		-0.058981	0.992929	6416	6002	0.253209	0.249103	6942	9257	1.36919	0.0010315	5927	19904	0.103718	0.817016	6668	8339	orf19.2996	ECM30	Putative protein of unknown function; may play a role in cell wall biosynthesis, mutants have abormal relative levels of mannose and glucose and have Gap1p sorting and transport defects; (GFP)-fusion protein localizes to the cytoplasm
CPAR2_806800		-0.219226	0.797945	18434	15385	-0.117933	0.702539	13476	13920	-1.36676	6.46528e-05	12751	6622	-0.10623	0.818825	9907	10741	No C.albicans ortholog
CPAR2_203830		0.0928992	0.916376	66703	69204	-0.342434	0.227566	62603	55554	-1.36671	0.000107501	62634	31849	-0.365624	0.633691	36665	33788	orf19.1738 (UGP1)	UGP1	UDP-glucose pyrophosphorylase (UGPase), catalyses the reversible formation of UDP-Glc from glucose 1-phosphate and UTP, involved in a wide variety of metabolic pathways, expression modulated by Pho85p through Pho4p
CPAR2_102680		0.0134126	0.998689	4113	4040	0.0730797	0.831607	6380	7495	1.3665	3.82712e-05	4416	15488	0.0597826	0.940331	8434	10352	orf19.329	MSL5	Component of the commitment complex, which defines the first step in the splicing pathway; essential protein that interacts with Mud2p and Prp40p, forming a bridge between the intron ends; also involved in nuclear retention of pre-mRNA
CPAR2_201740		-0.124208	0.992929	420	376	-0.168692	0.782396	555	545	1.36639	0.00540573	592	2090	-0.109399	0.820034	3312	3586	orf19.69
CPAR2_207480		0.0866783	0.993547	15941	16363	-0.000666168	0.998394	20118	22871	-1.36483	0.0207885	27499	14450	-0.195116	0.720562	20368	20913	orf19.5250
CPAR2_206060		0.0310926	0.998689	1042	1041	-0.0887306	0.881922	812	854	1.36415	0.020195	468	1656	0.132251	0.899867	899	1112	orf19.4659	PRP21	Subunit of the SF3a splicing factor complex, required for spliceosome assembly
CPAR2_703230		-0.218705	0.793166	2663	2228	-0.163384	0.596205	2405	2394	1.36393	0.0465511	2350	7634	-0.0325828	0.956629	856	960	orf19.7043	YLR050C	Putative protein of unknown function; green fluorescent protein (GFP)-fusion protein localizes to the endoplasmic reticulum; YLR050C is not an essential gene
CPAR2_200270		-0.460398	0.768795	13100	9321	-0.616028	9.29818e-05	13481	9836	-1.36329	0.00273807	11627	6112	-0.122274	0.761637	12738	13573	orf19.7675	MRPL25	Mitochondrial ribosomal protein of the large subunit; mutation confers increased replicative lifespan
CPAR2_500710		-0.380559	0.152923	1852	1384	-0.424538	0.214079	2245	1865	-1.3624	0.00101126	2115	1072	-0.108612	0.86122	2064	2269	orf19.3825 (RCE1)	RCE1	Type II CAAX prenyl protease involved in the proteolysis and maturation of Ras and the a-factor mating pheromone
CPAR2_202600		0.233055	0.82653	153322	174905	-0.166682	0.653649	97605	97129	-1.36113	2.20193e-05	97546	50643	-0.345035	0.601496	113449	106971	orf19.4371 (TAL1)	TAL1	Transaldolase, enzyme in the non-oxidative pentose phosphate pathway; converts sedoheptulose 7-phosphate and glyceraldehyde 3-phosphate to erythrose 4-phosphate and fructose 6-phosphate
CPAR2_203440		0.98012	0.723009	379	721	0.900179	0.577565	1177	2447	-0.399693	0.572797	342	347	1.36054	0.01033	164	503	No C.albicans ortholog
CPAR2_109590		-0.189778	0.762422	10553	9015	1.35843	8.13019e-08	4695	13490	0.418706	0.332631	3551	6388	0.0765635	0.862458	5479	6741	orf19.6092 (KEL1)	KEL1	Protein required for proper cell fusion and cell morphology; functions in a complex with Kel2p to negatively regulate mitotic exit, interacts with Tem1p and Lte1p; localizes to regions of polarized growth; potential Cdc28p substrate
CPAR2_400250		0.197871	0.958015	7555	8463	0.588531	0.133929	7988	13522	1.35812	0.00186823	4754	16902	0.118076	0.822589	12790	16083	orf19.2724
CPAR2_400320		0.00958812	0.999	1871	1839	0.261531	0.545592	1307	1760	1.35774	0.002701	1226	4311	-0.182381	0.675857	3430	3504	orf19.2715 (RPC53)	RPC53	RNA polymerase III subunit C53
CPAR2_802930		-0.385892	0.759045	26723	19997	-0.834626	5.01494e-07	28371	17937	-1.3558	5.84351e-06	27193	14137	-0.145214	0.737247	24295	25813	orf19.2524 (MGE1)	MGE1	Mitochondrial matrix cochaperone, acts as a nucleotide release factor for Ssc1p in protein translocation and folding; also acts as cochaperone for Ssq1p in folding of Fe-S cluster proteins; homolog of E. coli GrpE
CPAR2_209200		-0.269439	0.944994	10790	8678	-0.54907	0.00154038	11127	8475	-1.3553	0.00029582	11641	6052	0.0156438	0.975078	7557	8833	orf19.2305	GIM4	Subunit of the heterohexameric cochaperone prefoldin complex which binds specifically to cytosolic chaperonin and transfers target proteins to it
CPAR2_201510		0.180845	0.984943	8941	9908	0.273426	0.230349	8344	11368	1.35471	7.84763e-07	7974	27834	0.147556	0.816844	5272	6678	orf19.5001 (CUP2)	HAA1	Transcriptional activator involved in the transcription of TPO2, YRO2, and other genes putatively encoding membrane stress proteins; involved in adaptation to weak acid stress
CPAR2_502810		0.385424	0.992929	3471	4492	-1.35423	1.54763e-05	26176	11393	-0.874582	0.0280485	40630	29482	0.11855	0.799683	1550	1958	orf19.2496 (ATO2)
CPAR2_207820		-0.256966	0.850281	4598	3759	-0.0985317	0.770201	2954	3091	1.35407	1.14706e-05	2540	8792	0.0228116	0.952211	6864	8157	orf19.674	CWC2	Member of the NineTeen Complex (NTC) that contains Prp19p and stabilizes U6 snRNA in catalytic forms of the spliceosome containing U2, U5, and U6 snRNAs; binds directly to U6 snRNA; similar to S. pombe Cwf2
CPAR2_204190		-0.462399	0.789085	12162	8639	-0.607002	0.00015276	9417	6925	-1.35407	0.0113701	9196	4893	0.0826083	0.875299	9053	11004	orf19.549	MRPL32	Mitochondrial ribosomal protein of the large subunit
CPAR2_204550		0.212045	0.956047	576	648	1.35352	2.33367e-08	604	1742	0.229892	0.664412	622	984	-0.225414	0.672746	660	659	orf19.5848
CPAR2_201580		-0.129711	0.992929	13138	11617	-0.714672	6.38728e-06	14981	10280	-1.35304	0.00206322	17252	8920	-0.22576	0.72459	14417	14456	orf19.5008.1 (DAD1)	DAD1	Essential subunit of the Dam1 complex (aka DASH complex), couples kinetochores to the force produced by MT depolymerization thereby aiding in chromosome segregation; is transferred to the kinetochore prior to mitosis
CPAR2_804340		0.0564831	0.992929	4609	4671	0.726943	0.00815275	7315	13516	1.35293	0.0186566	6797	21957	0.0703338	0.918513	4801	5988	orf19.988	YGR149W	Putative protein of unknown function; predicted to be an integal membrane protein
CPAR2_100850		0.421701	0.910599	96	125	1.35234	0.0123276	176	511	0.577999	0.271001	119	239	-1.08547	0.523655	219	123	orf19.3932
CPAR2_406490		-0.164104	0.99233	8049	6963	-1.34952	1.37073e-07	6035	2682	-1.09351	0.226574	6088	3979	-0.210765	0.634496	10183	10234	orf19.2276	RPB9	RNA polymerase II subunit B12.6; contacts DNA; mutations affect transcription start site selection and fidelity of transcription
CPAR2_404840		-0.0509652	0.994923	445427	416206	-1.1589	3.85275e-05	490776	250026	-1.34934	0.0240728	659402	354242	-0.575824	0.193408	400805	312245	orf19.7417 (TSA1)	TSA1	Thioredoxin peroxidase, acts as both a ribosome-associated and free cytoplasmic antioxidant; self-associates to form a high-molecular weight chaperone complex under oxidative stress; deletion results in mutator phenotype
CPAR2_212800		0.0955581	0.992929	1389	1451	0.266609	0.372842	1070	1447	1.34907	0.0029488	1039	3674	0.0841016	0.88726	2303	2815	orf19.1590
CPAR2_212380		-0.451546	0.754335	22474	15949	-0.749542	0.000295193	46263	30932	-1.34789	0.00430476	52387	26493	-0.411407	0.588141	28531	25122	orf19.5825.1	YOS1	Integral membrane protein required for ER to Golgi transport; localized to the Golgi, the ER, and COPII vesicles; interacts with Yip1p and Yif1p
CPAR2_404610		0.00474965	0.99901	4816	4683	-0.506929	0.0051619	4347	3420	-1.34619	2.86974e-05	4319	2282	0.187997	0.672746	2416	3189	orf19.7425	UNG1	Uracil-DNA glycosylase, required for repair of uracil in DNA formed by spontaneous cytosine deamination, not required for strand-specific mismatch repair, cell-cycle regulated, expressed in late G1, localizes to mitochondria and nucleus
CPAR2_804230		0.193725	0.983519	191	213	0.472035	0.433914	226	356	1.34371	0.00788007	190	642	0.657557	0.459718	377	665	orf19.984 (PHO8)
CPAR2_206090		-0.108283	0.958368	8411	7602	-0.995	5.09388e-09	9500	5366	-1.34314	9.23746e-05	9170	4948	0.208802	0.682159	4179	5581	orf19.1843 (ALG6)	ALG6	Alpha 1,3 glucosyltransferase, involved in transfer of oligosaccharides from dolichyl pyrophosphate to asparagine residues of proteins during N-linked protein glycosylation; mutations in human ortholog are associated with disease
CPAR2_406710		-0.0362277	0.992929	6862	6520	1.34245	1.82245e-11	7949	22628	0.970229	0.200885	6576	16311	0.0338589	0.941739	5710	6808	orf19.2248 (ARE2)	ARE2	Acyl-CoA:sterol acyltransferase, isozyme of Are1p; endoplasmic reticulum enzyme that contributes the major sterol esterification activity in the presence of oxygen
CPAR2_300910		-0.0583516	0.992929	6351	5929	-0.230699	0.344872	5084	4865	-1.34228	8.0625e-06	4672	2447	0.112539	0.801391	3764	4731	orf19.7035 (RFC2)	RFC2	Subunit of heteropentameric Replication factor C (RF-C), which is a DNA binding protein and ATPase that acts as a clamp loader of the proliferating cell nuclear antigen (PCNA) processivity factor for DNA polymerases delta and epsilon
CPAR2_801040		-0.0401184	0.998689	414	389	1.3422	0.000500833	248	704	1.18785	0.0220278	302	936	-0.0227134	0.975693	439	509	orf19.164	LPX1	Oleic acid-inducible, peroxisomal matrix localized lipase; transcriptionally activated by Yrm1p along with genes involved in multidrug resistance; peroxisomal import is dependent on the PTS1 receptor, Pex5p and on self-interaction
CPAR2_204880		0.282467	0.849567	105012	124751	-0.291541	0.206247	117507	107401	-1.34119	0.00291837	111238	59070	0.186534	0.634366	28930	37974	orf19.3888 (PGI1)	PGI1	Glycolytic enzyme phosphoglucose isomerase, catalyzes the interconversion of glucose-6-phosphate and fructose-6-phosphate; required for cell cycle progression and completion of the gluconeogenic events of sporulation
CPAR2_300580		1.00438	0.168935	1097	2151	0.228704	0.718331	3430	4370	-0.0295658	0.968456	3579	4672	1.33895	7.50377e-06	799	2378	No C.albicans ortholog
CPAR2_803740		-0.147512	0.992929	80	70	1.33817	0.0189962	114	324	-0.519306	0.565041	142	136	0.297176	0.664528	378	541	orf19.7482
CPAR2_502700		0.414252	0.89042	2512	3278	0.203911	0.676169	1193	1538	1.33803	0.0138238	704	2505	0.716954	0.620615	968	1764	orf19.4000 (GRF10)	PHO2	Homeobox transcription factor; regulatory targets include genes involved in phosphate metabolism; binds cooperatively with Pho4p to the PHO5 promoter; phosphorylation of Pho2p facilitates interaction with Pho4p
CPAR2_301500		-0.412723	0.0013692	17795	13022	-0.406715	0.0101499	18323	15464	-1.33715	6.46347e-06	17316	9393	-0.842539	0.0138056	10407	6751	orf19.7068 (MAC1)	MAC1	Copper-sensing transcription factor involved in regulation of genes required for high affinity copper transport
CPAR2_300340		0.185582	0.973098	9906	10924	1.33619	3.39242e-14	7028	19759	-0.518146	0.174941	6628	6296	0.292231	0.455561	7787	11103	orf19.7009
CPAR2_109370		-0.392044	0.720714	12432	9255	-0.874389	1.90639e-09	11518	7047	-1.33575	0.0200363	10292	5538	0.00155827	0.997466	12772	14928	orf19.3350 (MRP20)	MRP20	Mitochondrial ribosomal protein of the large subunit
CPAR2_602930		0.30211	0.992929	54	65	-0.242422	0.804465	239	226	-1.33539	0.00435067	358	198	-0.329662	0.843642	137	126	orf19.3655
CPAR2_214010		0.23115	0.33592	7231	8271	0.651531	0.00157546	5712	10075	1.335	4.20169e-08	4474	15302	0.217413	0.646037	8257	11099	orf19.1995
CPAR2_211810		0.420225	0.716483	138946	181874	-0.764581	0.00738205	207681	136859	-1.33383	0.000167069	184385	95469	-0.088522	0.882837	43343	48031	orf19.903 (GPM1)	GPM1	Tetrameric phosphoglycerate mutase, mediates the conversion of 3-phosphoglycerate to 2-phosphoglycerate during glycolysis and the reverse reaction during gluconeogenesis
CPAR2_808690		-0.234533	0.498007	37347	30869	-0.180119	0.531731	18780	18393	-1.33045	3.42859e-06	15211	8167	-0.218134	0.586715	39628	39506	orf19.6812 (PMT2)	PMT2	Protein O-mannosyltransferase, transfers mannose residues from dolichyl phosphate-D-mannose to protein Ser/Thr residues; involved in ER quality control; acts in a complex with Pmt1p, can instead interact with Pmt5; target for new antifungal
CPAR2_805960		-0.271803	0.923673	166217	134439	-1.07585	4.63137e-06	111596	59248	-1.33013	0.013671	107885	56972	-0.486617	0.367682	208859	176238	orf19.5904 (RPL19A)	RPL19A	Protein component of the large (60S) ribosomal subunit, nearly identical to Rpl19Bp and has similarity to rat L19 ribosomal protein; rpl19a and rpl19b single null mutations result in slow growth, while the double null mutation is lethal
CPAR2_213980		-0.148391	0.565538	11660	10241	-0.0478749	0.900969	11873	12846	-1.32859	1.16008e-05	11935	6285	-0.228773	0.616635	10628	10670	orf19.1991	PTM1	Protein of unknown function, copurifies with late Golgi vesicles containing the v-SNARE Tlg2p
CPAR2_200160		-0.299358	0.0960595	2727	2158	0.0337886	0.937096	3885	4477	1.32708	0.0308332	3472	10984	-0.163145	0.825119	7879	8414	orf19.7646	PIH1	Component of the conserved R2TP complex (Rvb1-Rvb2-Tah1-Pih1); R2TP complex interacts with Hsp90 (Hsp82p and Hsc82p) to mediate assembly large protein complexes such as box C/D snoRNPs and RNA polymerase II
CPAR2_403720		-0.358964	0.323642	10409	7915	-0.521556	0.0606798	10742	8322	-1.32694	0.000328022	10144	5501	0.190705	0.578571	9440	12520	orf19.1303	MRF1	Mitochondrial translation release factor, involved in stop codon recognition and hydrolysis of the peptidyl-tRNA bond during mitochondrial translation; lack of MRF1 causes mitochondrial genome instability
CPAR2_211140		-0.193348	0.928023	1568	1332	-0.40404	0.308976	1489	1240	1.32642	0.0208914	1064	3647	0.101266	0.917171	4395	5611	orf19.2018	JJJ3	Protein of unknown function, contains a CSL Zn finger and a DnaJ-domain; involved in diphthamide biosynthesis; ortholog human Dph4
CPAR2_301560		-0.388745	0.460561	10906	8133	-0.545913	0.0217047	10488	8065	-1.32621	0.0120859	11344	6046	-0.30328	0.620615	22070	21322	orf19.6531.1 (TOM71)	TOM7	Component of the TOM (translocase of outer membrane) complex responsible for recognition and initial import steps for all mitochondrially directed proteins; promotes assembly and stability of the TOM complex
CPAR2_101710		-0.215173	0.597502	2202	1848	0.000322284	0.998555	2207	2479	1.32572	0.00301227	1854	6033	-0.100672	0.849739	1841	2013	orf19.4222 (SST2)	SST2	GTPase-activating protein for Gpa1p, regulates desensitization to alpha factor pheromone; also required to prevent receptor-independent signaling of the mating pathway; member of the RGS (regulator of G-protein signaling) family
CPAR2_808380		-0.435614	0.0122022	6372	4582	-0.181555	0.442401	8379	8244	-1.32571	4.66896e-05	6799	3632	0.281425	0.562545	1913	2695	orf19.5862 (AFP99)
CPAR2_201700		-0.047046	0.993547	4258	3996	-0.478836	0.0220709	4305	3489	-1.32546	0.00923625	4582	2436	-0.40606	0.412908	6635	5880	orf19.6359	SOM1	Subunit of the mitochondrial inner membrane peptidase, which is required for maturation of mitochondrial proteins of the intermembrane space; Som1p facilitates cleavage of a subset of substrates; contains twin cysteine-x9-cysteine motifs
CPAR2_700480		-0.194096	0.99233	7361	6294	-0.261681	0.462298	7308	6706	-1.32525	0.00852157	5594	3055	-0.295847	0.548234	3561	3430	orf19.7243	DCD1	Deoxycytidine monophosphate (dCMP) deaminase; involved in dUMP and dTMP biosynthesis; expression is NOT cell cycle regulated
CPAR2_500980		0.349092	0.846877	4439	5484	0.0443216	0.895182	2565	2982	-1.32505	0.000509218	2338	1226	0.103469	0.839002	3013	3742	orf19.2885 (PRI2)	PRI2	Subunit of DNA primase, which is required for DNA synthesis and double-strand break repair
CPAR2_302430		-0.0974452	0.981379	4496	4097	-0.37475	0.260975	4017	3454	1.32466	0.00233085	2818	9732	0.157565	0.843642	5523	7015	orf19.3798	TRM8	Noncatalytic subunit of a tRNA methyltransferase complex; Trm8p and Trm82p comprise an enzyme that catalyzes a methyl-transfer from S-adenosyl-l-methionine to the N(7) atom of guanine at position 46 in tRNA; Trm8 lacks catalytic activity if not bound to Trm82p
CPAR2_407330		0.0722139	0.993547	20079	20634	-0.319279	0.236661	73078	66222	-1.32354	0.0322981	96442	51968	-0.375719	0.45033	88553	79429	orf19.1367.1
CPAR2_101060		0.0771626	0.993547	7517	7771	-0.268634	0.482694	5454	5087	1.32328	0.0243005	4592	16471	-0.146214	0.801556	4470	4719	orf19.3969 (SFL2)	MGA1	Protein similar to heat shock transcription factor; multicopy suppressor of pseudohyphal growth defects of ammonium permease mutants
CPAR2_701290		-0.379441	0.972354	10519	7945	-0.763143	0.00190172	33402	21965	-1.32307	0.0352236	31049	15548	-0.144482	0.78367	3538	3771	orf19.7325 (SCO1)	SCO1	Copper-binding protein of the mitochondrial inner membrane, required for cytochrome c oxidase activity and respiration; may function to deliver copper to cytochrome c oxidase; has similarity to thioredoxins
CPAR2_205070		-0.144247	0.992929	11689	10325	0.182754	0.63015	9713	12335	1.32299	0.000850396	6726	23390	-0.08381	0.912067	12444	13413	orf19.3854	SAT4	Ser/Thr protein kinase involved in salt tolerance; funtions in regulation of Trk1p-Trk2p potassium transporter; partially redundant with Hal5p; has similarity to Npr1p
CPAR2_502870		0.265319	0.789085	2595	3030	0.788548	0.0124798	3195	6196	1.32238	0.0255771	2875	9290	-0.403244	0.601496	2583	2329	orf19.2515
CPAR2_209970		-0.0267925	0.993547	1401	1338	-0.0536338	0.936212	1939	2103	1.32199	0.0113526	2107	7206	-0.672968	0.24787	5475	4087	orf19.5205
CPAR2_110030		0.0747601	0.969646	4240	4346	-0.203744	0.441903	3684	3599	-1.32065	2.07112e-05	3353	1783	-0.362605	0.322747	3337	3041	orf19.6013	TRI1	Non-essential sumoylated protein of unknown function with similarity to components of human SWI/SNF complex including SMRD3; green fluorescent protein (GFP)-fusion protein localizes to the cytoplasm, nucleus and nucleolus
CPAR2_402920		0.0929223	0.993547	3071	3168	-1.32061	3.54741e-09	1870	844	-1.02066	0.0537677	2006	1340	-0.132455	0.822791	2908	3103	orf19.5636 (RBT5)
CPAR2_300940		-0.299771	0.408646	6147	4861	-0.251177	0.27117	6676	6257	-1.32057	3.02095e-05	5911	3197	-0.182446	0.629408	6596	6748	orf19.6461	COX20	Mitochondrial inner membrane protein, required for proteolytic processing of Cox2p and its assembly into cytochrome c oxidase
CPAR2_103180		0.16564	0.992929	65381	71895	-0.250545	0.297835	161901	151939	-1.32044	0.0224507	158006	85194	-0.280403	0.308145	238630	227377	orf19.913.2	QCR6	Subunit 6 of the ubiquinol cytochrome-c reductase complex, which is a component of the mitochondrial inner membrane electron transport chain; highly acidic protein; required for maturation of cytochrome c1
CPAR2_200930		-0.0666448	0.993547	1945	1816	0.230092	0.527278	2228	2944	1.31911	0.0337379	2446	8938	0.536493	0.604649	1621	2704	orf19.7561 (DEF1)
CPAR2_211640		-0.535439	0.127015	7112	4788	0.341985	0.141233	13975	20039	1.31831	0.00230601	13710	44414	0.00109422	0.998148	11220	13473	orf19.5785
CPAR2_500950		0.26823	0.778804	27937	32642	0.100476	0.811087	27925	33654	-1.3179	0.00220502	29015	15553	-0.171689	0.689102	30001	31333	orf19.1801 (CBR1)	CBR1	Microsomal cytochrome b reductase, not essential for viability; also detected in mitochondria; mutation in conserved NADH binding domain of the human ortholog results in type I methemoglobinemia
CPAR2_205560		0.0232631	0.993547	2478	2449	1.31762	1.21241e-07	2282	6350	0.582868	0.161584	2085	4082	-0.654194	0.478318	7063	5451	No C.albicans ortholog
CPAR2_601460		-0.382441	0.769369	24617	18462	-0.670528	1.22427e-06	18042	12688	-1.31731	0.00341188	16420	8967	0.0784613	0.870208	7413	9080	orf19.3480	RSM23	Mitochondrial ribosomal protein of the small subunit, has similarity to mammalian apoptosis mediator proteins; null mutation prevents induction of apoptosis by overproduction of metacaspase Mca1p
CPAR2_801670		-0.386833	0.961296	4755	3574	-0.761156	3.3294e-05	6928	4548	-1.31698	0.0261689	6591	3666	-0.0863605	0.892199	5180	5719	orf19.4929	PET309	Specific translational activator for the COX1 mRNA, also influences stability of intron-containing COX1 primary transcripts; localizes to the mitochondrial inner membrane; contains seven pentatricopeptide repeats (PPRs)
CPAR2_500900		-0.519242	0.60577	163	111	1.0702	0.0214184	230	549	1.31688	0.0487746	269	901	0.0602988	0.915002	941	1142	orf19.3109
CPAR2_601780		0.150824	0.930863	3087	3333	1.31675	3.46257e-08	2887	8091	0.401993	0.495284	2691	4779	0.0374949	0.952211	713	848	orf19.692
CPAR2_203160		-0.323199	0.992929	6769	5330	-1.3163	0.0132665	4747	2149	0.74633	0.291233	3221	7262	0.16485	0.783553	11424	14760	orf19.2360 (URA2)	URA2	Bifunctional carbamoylphosphate synthetase (CPSase)-aspartate transcarbamylase (ATCase), catalyzes the first two enzymatic steps in the de novo biosynthesis of pyrimidines; both activities are subject to feedback inhibition by UTP
CPAR2_106830		-0.342172	0.907868	27042	20667	-1.11848	7.59316e-07	24978	12831	-1.31616	0.000164606	21522	11337	-0.333034	0.578571	17090	16089	orf19.4544
CPAR2_603060		0.33392	0.862907	3853	4715	-1.31498	4.97694e-09	3350	1507	-0.53275	0.420495	2565	2500	0.061478	0.910359	1349	1642	orf19.95	PRM5	Pheromone-regulated protein, predicted to have 1 transmembrane segment; induced during cell integrity signaling
CPAR2_201390		0.132917	0.984943	2513	2687	-0.0943523	0.853754	2670	2811	1.31338	0.000548676	2374	8089	-0.0616549	0.928887	4636	5078	orf19.6347	CDC40	Pre-mRNA splicing factor, important for catalytic step II of pre-mRNA splicing and plays a role in cell cycle progression; required for DNA synthesis during mitosis and meiosis; has WD repeats
CPAR2_106030		-0.345163	0.720714	7373	5666	-0.611137	0.00110116	10458	7659	-1.31154	9.84003e-05	9424	5035	0.0987444	0.787071	5380	6684	orf19.2984 (MST1)	MST1	Mitochondrial threonyl-tRNA synthetase; aminoacylates both the canonical threonine tRNA tT(UGU)Q1 and the unusual threonine tRNA tT(XXX)Q2 in vitro
CPAR2_303870		-0.520157	0.45955	11495	7836	-0.810836	9.87393e-07	10747	6838	-1.30985	0.0350129	9369	5212	-0.0597597	0.892253	9323	10463	orf19.1956	MSC6	Protein of unknown function; mutant is defective in directing meiotic recombination events to homologous chromatids; the authentic, non-tagged protein is detected in highly purified mitochondria in high-throughput studies
CPAR2_602830		-0.359078	0.90324	9663	7296	-0.761165	0.000180906	16790	11054	-1.30974	4.37858e-05	18067	9618	0.260588	0.515941	1871	2599	orf19.4195
CPAR2_102000		0.103256	0.992929	8999	9441	-0.0163753	0.971607	10806	11965	1.30954	0.0411564	8836	28155	0.537702	0.469461	6504	10962	orf19.255 (ZCF1)
CPAR2_203700		-0.453764	0.855882	1948	1379	-0.725977	0.00011245	2143	1449	-1.30896	0.000130958	2168	1174	-0.125198	0.86122	2821	3013	orf19.1162.1	YJR112W-A	Putative protein of unknown function; identified based on homology to <i>Ashbya gossypii</i>
CPAR2_501290		1.08523	0.396511	5331	11089	1.24984	0.00194947	3542	9369	1.30834	0.13882	1659	6013	0.570966	0.629408	1543	2594	orf19.3127 (CZF1)
CPAR2_802100		-0.0478019	0.993547	1258	1185	-0.265353	0.708083	1239	1151	1.30831	0.0305616	1032	3494	-0.124444	0.825119	3201	3432	orf19.4399	NCS2	Protein required for thiolation of the uridine at the wobble position of Lys(UUU) and Glu(UUC) tRNAs; has a role in urmylation and in invasive and pseudohyphal growth; inhibits replication of Brome mosaic virus in S. cerevisiae
CPAR2_802140		-0.0406758	0.993547	705	670	-0.168978	0.72802	582	585	1.30783	0.00801558	469	1566	0.0484493	0.926125	777	931	orf19.2384	MTG1	Putative GTPase peripheral to the mitochondrial inner membrane, essential for respiratory competence, likely functions in assembly of the large ribosomal subunit, has homologs in plants and animals
CPAR2_105220		-0.0633398	0.993547	5216	4841	-0.47413	0.0359357	8546	6847	-1.30726	0.00793143	9612	5020	-0.330959	0.634496	6877	6439	orf19.6849 (ELC1)	ELC1	Elongin C, conserved among eukaryotes; forms a complex with Cul3p that polyubiquitylates monoubiquitylated RNA polymerase II to trigger its proteolysis; plays a role in global genomic repair
CPAR2_206940		-0.707866	0.420594	4880	2926	-0.568004	0.00605768	5000	3767	-1.30713	0.00296551	4404	2408	-0.157695	0.69845	4410	4640	orf19.6231 (MRPL19)	MRPL19	Mitochondrial ribosomal protein of the large subunit
CPAR2_405800		-0.0774279	0.992929	1207	1116	0.492327	0.212435	841	1323	1.30692	1.92303e-06	642	2147	0.201558	0.68252	1902	2525	orf19.7389 (REV3)	REV3	Catalytic subunit of DNA polymerase zeta, involved in translesion synthesis during post-replication repair; required for mutagenesis induced by DNA damage; involved in double-strand break repair
CPAR2_701890		0.458668	0.985582	912	1209	-0.0820636	0.849293	719	757	-1.30689	0.00232959	656	356	0.390593	0.672746	367	546	No C.albicans ortholog
CPAR2_203360		0.0699623	0.992929	24240	24714	0.566715	0.0317345	22462	36976	-1.30647	2.06745e-06	21080	11460	0.0120524	0.970261	11771	13836	orf19.645.1 (VMA13)	VMA13	Subunit H of the eight-subunit V1 peripheral membrane domain of the vacuolar H+-ATPase (V-ATPase), an electrogenic proton pump found throughout the endomembrane system; serves as an activator or a structural stabilizer of the V-ATPase
CPAR2_602430		-0.377013	0.115484	15556	11640	-0.761653	0.000130635	8043	5302	-1.30553	0.0152646	6409	3482	-0.116713	0.825119	8718	9247	orf19.3438	SCJ1	One of several homologs of bacterial chaperone DnaJ, located in the ER lumen where it cooperates with Kar2p to mediate maturation of proteins
CPAR2_808130		-0.0178004	0.994923	5415	5215	0.0816836	0.829679	5107	6068	1.30551	0.000445329	4275	13908	0.0424511	0.934806	8657	10239	orf19.6716 (ABD1)	ABD1	Methyltransferase, catalyzes the transfer of a methyl group from S-adenosylmethionine to the GpppN terminus of capped mRNA
CPAR2_703320		-1.22468	8.82285e-05	5884	2451	0.137886	0.788222	7027	8603	1.30524	0.00315614	4712	15154	0.395553	0.558966	3386	5278	orf19.6570 (NUP)
CPAR2_201820		-0.0425198	0.993547	45057	42495	-1.30446	0.00135306	42445	19807	-1.13609	0.385782	67711	43662	0.0635329	0.908454	92656	110856	orf19.3755	MRPL15	Mitochondrial ribosomal protein of the large subunit
CPAR2_106740		0.0987254	0.944994	4484	4681	0.475617	0.00310183	4357	6802	1.30423	0.000368187	3580	11958	0.188813	0.718287	3175	4153	orf19.4534	UBX7	UBX (ubiquitin regulatory X) domain-containing protein that interacts with Cdc48p
CPAR2_304090		0.144801	0.99161	4402	4746	0.0174083	0.971666	5150	5832	-1.3033	0.0375596	4910	2728	-0.113357	0.820397	6425	6979	orf19.947 (MRP17)	MRP17	Mitochondrial ribosomal protein of the small subunit; MRP17 exhibits genetic interactions with PET122, encoding a COX3-specific translational activator
CPAR2_808590		0.104909	0.878914	4501	4716	1.30115	1.45676e-12	4902	13491	-0.337229	0.335748	3789	4032	0.0690891	0.841551	3065	3741	orf19.6821	APC2	Subunit of the Anaphase-Promoting Complex/Cyclosome (APC/C), which is a ubiquitin-protein ligase required for degradation of anaphase inhibitors, including mitotic cyclins, during the metaphase/anaphase transition; component of the catalytic core of the APC/C; has similarity to cullin Cdc53p
CPAR2_504180		-0.00849002	0.999	4088	3958	-0.609772	0.00993601	5018	3647	-1.30084	0.040048	4543	2584	0.107009	0.877251	4637	5729	orf19.3631 (STN1)	STN1	Telomere end-binding and capping protein, plays a key role with Pol12p in linking telomerase action with completion of lagging strand synthesis, and in a regulatory step required for telomere capping
CPAR2_502100		0.158311	0.992929	4436	4868	-1.30069	0.000106198	8462	3770	-1.02114	0.0334607	5406	3530	-0.163969	0.749126	3446	3630	orf19.6656 (DUR3)
CPAR2_209820		0.192011	0.910599	2469	2752	0.649805	0.0415551	2301	4042	1.30064	0.00251425	2150	7413	-0.142517	0.73282	3306	3513	orf19.4122	TES1	Peroxisomal acyl-CoA thioesterase likely to be involved in fatty acid oxidation rather than fatty acid synthesis; conserved protein also found in human peroxisomes; TES1 mRNA levels increase during growth on fatty acids
CPAR2_302340		0.111461	0.992929	787	830	0.366149	0.518449	780	1123	1.30038	0.0104509	656	2220	-0.0387908	0.946405	1640	1877	orf19.1411
CPAR2_503680		-0.116921	0.992929	6478	5850	0.0757846	0.865796	5816	6841	1.30036	9.23827e-05	4817	15916	-0.0968618	0.816333	12358	13439	orf19.1687	PRP43	RNA helicase in the DEAH-box family, functions in both RNA polymerase I and polymerase II transcript metabolism, involved in release of the lariat-intron from the spliceosome
CPAR2_301550		-0.0809984	0.992929	2373	2190	0.00755766	0.993422	1704	1925	1.29919	0.0339358	1658	5625	0.0934367	0.854275	4092	5056	orf19.6532	FLX1	Protein required for transport of flavin adenine dinucleotide (FAD), a synthesis product of riboflavin, across the mitochondrial membrane
CPAR2_801810		0.0916299	0.992929	16062	16608	0.476051	0.0189899	19956	31286	-1.29749	0.000150569	25421	13876	-0.375929	0.5543	17028	15542	orf19.4939	MON2	Peripheral membrane protein with a role in endocytosis and vacuole integrity, interacts with Arl1p and localizes to the endosome; member of the Sec7p family of proteins
CPAR2_800180		0.184222	0.789085	123792	136810	-0.371034	0.117217	211873	184074	-1.29661	0.00329531	223849	121995	-0.11076	0.855875	146030	157320	orf19.2846
CPAR2_801740		-0.108014	0.99233	1288	1166	-0.0796924	0.894874	831	882	1.29597	0.0010315	615	2077	0.501359	0.680633	754	1187	orf19.4948	REX3	RNA exonuclease; required for maturation of the RNA component of RNase MRP; functions redundantly with Rnh70p and Rex2p in processing of U5 snRNA and RNase P RNA; member of RNase D family of exonucleases
CPAR2_502480		0.0345096	0.998598	13032	12930	-0.765566	0.00758351	16841	11317	-1.29518	0.0486683	22715	12769	0.0873668	0.858426	20398	24987	orf19.4250
CPAR2_210880		0.606542	0.366979	1095	1620	1.29396	3.56184e-06	1703	4692	0.37247	0.416416	1607	2818	0.383946	0.496327	1102	1681	orf19.1562
CPAR2_701470		-0.370192	0.251334	22948	17253	-0.9137	0.000535735	23090	13767	-1.29182	5.41316e-06	24282	13450	-0.316012	0.350736	18479	17142	orf19.7304
CPAR2_203890		0.0432562	0.992929	1825	1829	0.395079	0.112359	2666	3930	1.29175	0.00946079	2311	7411	0.10287	0.836185	2097	2593	orf19.1427	THI73	Putative plasma membrane permease proposed to be involved in carboxylic acid uptake and repressed by thiamine; substrate of Dbf2p/Mob1p kinase; transcription is altered if mitochondrial dysfunction occurs
CPAR2_109470		0.156426	0.897972	820	890	0.627478	0.116456	627	1092	1.28926	0.00170803	528	1751	-0.325583	0.598074	982	915	No C.albicans ortholog
CPAR2_600400		0.178573	0.936804	18210	20098	0.426244	0.0660346	26870	40201	0.414954	0.407845	24341	42294	1.2892	3.19072e-06	3293	9509	orf19.1078 (HBR2)	AGX1	Alanine:glyoxylate aminotransferase (AGT), catalyzes the synthesis of glycine from glyoxylate, which is one of three pathways for glycine biosynthesis in yeast; has similarity to mammalian and plant alanine:glyoxylate aminotransferases
CPAR2_807440		-0.104906	0.99233	1258	1141	0.116174	0.820542	793	963	1.2892	0.00273807	630	2110	0.235026	0.668873	1226	1664	orf19.5942	ITT1	Protein that modulates the efficiency of translation termination, interacts with translation release factors eRF1 (Sup45p) and eRF3 (Sup35p) in vitro, contains a zinc finger domain characteristic of the TRIAD class of proteins
CPAR2_204910		-0.0243305	0.999	5254	4992	-0.857203	0.000187373	5156	3228	-1.28865	0.0283118	6395	3537	-0.0187209	0.96451	6486	7405	orf19.3871	DAD3	Essential subunit of the Dam1 complex (aka DASH complex), couples kinetochores to the force produced by MT depolymerization thereby aiding in chromosome segregation; is transferred to the kinetochore prior to mitosis
CPAR2_205570		0.0200974	0.993547	3034	2992	1.28622	1.87082e-15	2394	6520	0.789171	0.0177932	2016	4632	-0.0437491	0.940331	4373	4978	orf19.6443
CPAR2_402870		0.175747	0.992929	162	178	-0.238609	0.820147	329	314	1.28439	0.002744	164	532	-0.0805457	0.916126	477	528	orf19.5672 (MEP2)	MEP2	Ammonium permease involved in regulation of pseudohyphal growth; belongs to a ubiquitous family of cytoplasmic membrane proteins that transport only ammonium (NH4+); expression is under the nitrogen catabolite repression regulation
CPAR2_403590		-0.0441999	0.992929	41257	38964	-0.0797638	0.813001	39167	41370	-1.28329	0.00097057	32497	18234	0.223824	0.765875	24181	31907	No C.albicans ortholog
CPAR2_106130		0.0127483	0.999	9541	9401	0.372849	0.263559	13518	19693	-1.28318	0.0485497	14568	7675	0.0806016	0.88647	2046	2529	orf19.3670 (GAL1)	GAL1	Galactokinase, phosphorylates alpha-D-galactose to alpha-D-galactose-1-phosphate in the first step of galactose catabolism; expression regulated by Gal4p
CPAR2_400680		0.111666	0.99233	651	684	0.141615	0.743206	641	795	1.28281	0.000492576	468	1525	-0.0403184	0.944045	736	838	orf19.4584 (PHO114)
CPAR2_204110		0.353412	0.916376	12233	15097	-0.440985	0.192346	21074	17681	-1.28272	0.0499693	30725	17377	0.0348641	0.942357	17262	20518	orf19.6313.2 (MVB12)
CPAR2_503710		0.0175065	0.994923	63314	62275	-0.436236	0.168482	149403	122738	-1.28091	0.00505327	173951	95184	-0.139525	0.851979	77365	82253	orf19.1702 (ARF3)
CPAR2_210000		0.249272	0.621724	1799	2084	-0.0457299	0.937287	1184	1283	1.28002	0.0174472	920	3065	-0.0299567	0.956629	2965	3363	orf19.3530 (CKA2)	CKA2	Alpha' catalytic subunit of casein kinase 2 (CK2), a Ser/Thr protein kinase with roles in cell growth and proliferation; CK2, comprised of CKA1, CKA2, CKB1 and CKB2, has many substrates including transcription factors and all RNA polymerase
CPAR2_402620		0.0943012	0.992929	12507	12960	0.25736	0.338899	8015	10724	-1.2779	0.00304737	7617	4115	-0.123564	0.81089	6928	7488	orf19.4624 (HRT2)	YMR027W	Putative protein of unknown function; green fluorescent protein (GFP)-fusion protein localizes to the nucleus and cytoplasm; YMR027W is not an essential gene
CPAR2_109390		0.207226	0.893227	1317	1480	0.954465	0.000763777	1150	2518	1.2757	3.45264e-07	1348	4432	-0.263023	0.659059	1684	1648	orf19.3352
CPAR2_100230		-0.290422	0.707628	9341	7420	-0.723691	2.73664e-06	9905	6726	-1.27567	0.033447	10575	5872	-0.423951	0.494911	8492	7482	orf19.4023 (MRP2)	MRP2	Mitochondrial ribosomal protein of the small subunit
CPAR2_702520		0.290179	0.992929	284	335	1.27487	0.000219701	264	717	-0.491118	0.527845	483	475	0.265772	0.683062	358	499	No C.albicans ortholog
CPAR2_504200		-0.300048	0.852531	10500	8292	-0.47379	0.0566472	17235	13815	-1.27394	0.00128184	19110	10697	-0.465686	0.548234	14906	12608	orf19.7128 (SYS1)	SYS1	Integral membrane protein of the Golgi required for targeting of the Arf-like GTPase Arl3p to the Golgi; multicopy suppressor of ypt6 null mutation
CPAR2_804090		-0.0816783	0.972354	11511	10583	-0.0741471	0.828488	9487	10082	-1.27378	2.98794e-05	8388	4634	-0.127831	0.741551	8728	9294	orf19.992 (LKH1)	LAP2	Leucyl aminopeptidase yscIV (leukotriene A4 hydrolase) with epoxide hydrolase activity, metalloenzyme containing one zinc atom; green fluorescent protein (GFP)-fusion protein localizes to the cytoplasm and nucleus
CPAR2_103610		0.0557243	0.992929	3905	3947	0.613066	0.016693	3610	6130	1.27332	3.49754e-05	2810	9243	0.0666823	0.898481	3981	4791	orf19.2204	YPL264C	Putative membrane protein of unknown function; physically interacts with Hsp82p; YPL264C is not an essential gene
CPAR2_400070		0.269688	0.255571	11500	13517	1.27319	7.18199e-23	10222	27725	0.0139764	0.971781	9286	12472	0.0188425	0.958486	9245	10850	orf19.2727 (GRX3)	GRX3	Hydroperoxide and superoxide-radical responsive glutathione-dependent oxidoreductase; monothiol glutaredoxin subfamily member along with Grx4p and Grx5p; protects cells from oxidative damage; evidence exists indicating that the translation start site is not Met1 as currently annotated, but rather Met36
CPAR2_404500		-0.125794	0.971185	769	686	-0.335676	0.467633	889	792	-1.27254	0.00521092	883	479	-0.430984	0.642236	1124	992	No C.albicans ortholog
CPAR2_500750		0.255142	0.897972	575	670	-0.069371	0.887713	795	850	1.27117	0.00129119	686	2204	0.0486647	0.948304	1083	1309	orf19.2899
CPAR2_603670		-0.41228	0.468449	17720	12986	-0.606276	0.000207427	16602	12132	-1.26881	0.0125746	15200	8511	-0.134635	0.767095	10531	11239	orf19.4204	PET123	Mitochondrial ribosomal protein of the small subunit; PET123 exhibits genetic interactions with PET122, which encodes a COX3 mRNA-specific translational activator
CPAR2_405220		0.236043	0.988667	3440	3924	-0.283557	0.456082	2555	2385	-1.26704	0.00726645	2956	1637	-0.371845	0.505611	4351	3984	orf19.4080	RNH202	Ribonuclease H2 subunit, required for RNase H2 activity; related to human AGS2 that causes Aicardi-Goutieres syndrome
CPAR2_806200		0.632494	2.34094e-10	77994	117800	1.26679	1.57008e-21	70582	190901	-1.09835	1.33828e-05	72573	45606	-0.072355	0.865264	46429	51494	orf19.3590 (IPP1)	IPP1	Cytoplasmic inorganic pyrophosphatase (PPase), homodimer that catalyzes the rapid exchange of oxygens from Pi with water, highly expressed and essential for viability, active-site residues show identity to those from E. coli PPase
CPAR2_703200		1.23704	0.501667	2819	6406	1.26603	2.68607e-05	810	2204	-0.0596268	0.92781	749	959	0.145363	0.836185	458	598	orf19.2133 (LIP4)
CPAR2_808320		0.0515227	0.999	3487	3480	1.26569	8.73037e-09	1030	2750	-0.624072	0.207458	707	603	0.252526	0.712317	770	1076	No C.albicans ortholog
CPAR2_212660		0.0807942	0.99233	1233	1269	0.399419	0.125383	903	1338	1.26426	0.000250775	797	2546	1.05405	0.310759	617	1432	No C.albicans ortholog
CPAR2_601430		0.247245	0.799589	5607	6462	0.280571	0.25224	4242	5755	1.26406	0.00153843	3789	12611	0.279711	0.751329	2916	4140	orf19.3476	HRR25	Protein kinase involved in regulating diverse events including vesicular trafficking, DNA repair, and chromosome segregation; binds the CTD of RNA pol II; homolog of mammalian casein kinase 1delta (CK1delta)
CPAR2_800880		-0.0147668	0.998689	15572	14970	0.0277513	0.945636	15052	17122	-1.26294	0.00151575	15359	8458	-0.0228583	0.961386	10206	11790	orf19.3251 (ARC19)	ARC19	Subunit of the ARP2/3 complex, which is required for the motility and integrity of cortical actin patches
CPAR2_205670		-0.475374	0.800795	174796	123035	-1.26258	0.000210096	136363	63486	-1.0646	0.124029	110819	70526	-0.0639055	0.875299	193505	216256	orf19.6367 (SSB1)	SSB2	Cytoplasmic ATPase that is a ribosome-associated molecular chaperone, functions with J-protein partner Zuo1p; may be involved in the folding of newly-synthesized polypeptide chains; member of the HSP70 family; homolog of SSB1
CPAR2_804860		-0.702131	0.000889764	8461	5074	-0.54686	0.0545651	15624	11941	-1.26213	0.00629405	14287	7716	0.270017	0.620615	3783	5242	orf19.4841 (SHY1)	SHY1	Mitochondrial inner membrane protein required for assembly of cytochrome c oxidase (complex IV); associates with complex IV assembly intermediates and complex III/complex IV supercomplexes; similar to human SURF1 involved in Leigh Syndrome
CPAR2_211420		0.258138	0.468449	22274	25980	0.807481	0.000103132	18189	35765	1.26116	0.0290083	16497	54221	0.650152	0.418718	6536	11594	orf19.868 (ADAEC)
CPAR2_503630		0.228188	0.771658	542	618	-0.435202	0.183771	921	760	-1.26115	0.00840278	837	450	0.043461	0.953105	327	393	orf19.1686	MPA43	Putative protein of unknown function; the authentic, non-tagged protein is detected in highly purified mitochondria in high-throughput studies
CPAR2_407710		-0.173439	0.992929	11746	10140	-0.658971	0.00580891	22641	15983	-1.26073	0.000814678	19789	11022	-0.789113	0.229049	22074	15068	No C.albicans ortholog
CPAR2_802360		-0.300336	0.889943	8756	6904	-0.219874	0.467633	10565	10233	-1.26021	0.000326701	11850	6627	-0.120491	0.844306	6998	7434	orf19.2412	VPS55	Late endosomal protein involved in late endosome to vacuole trafficking; functional homolog of human obesity receptor gene-related protein (OB-RGRP)
CPAR2_803880		-0.227815	0.651951	43511	36174	-0.159583	0.547835	41443	41244	-1.26009	2.77511e-05	40903	22895	-0.351381	0.314731	59507	54740	orf19.4831 (MTS1)
CPAR2_205290		-0.748295	0.515494	753	439	-0.501975	0.822182	8010	6262	1.25887	0.00103542	1448	4631	-0.58906	0.148283	6161	4772	orf19.535 (RBR1)
CPAR2_405080		-0.452849	0.826733	6082	4354	-0.483458	0.0313046	6115	4898	-1.2553	0.0111125	5703	3225	0.00240926	0.997334	6227	7239	orf19.1626	DYS1	Deoxyhypusine synthase, catalyzes formation of deoxyhypusine, the first step in hypusine biosynthesis; triggers posttranslational hypusination of translation elongation factor eIF-5A and regulates its intracellular levels; tetrameric
CPAR2_801250		-0.274524	0.772079	3929	3150	0.637216	0.0156481	3622	6316	1.25281	0.000590576	2301	7371	0.332211	0.48175	5746	8534	orf19.3733 (IDP2)	IDP2	Cytosolic NADP-specific isocitrate dehydrogenase, catalyzes oxidation of isocitrate to alpha-ketoglutarate; levels are elevated during growth on non-fermentable carbon sources and reduced during growth on glucose
CPAR2_400290		0.0306402	0.993547	3370	3352	0.0759855	0.881265	3948	4697	1.25259	0.000425987	3866	12184	-0.616776	0.455561	15711	12363	orf19.2721	CDC123	Protein involved in nutritional control of the cell cycle; regulates abundance of the translation initiation factor eIF2; ortholog of human D123 protein
CPAR2_206220		-0.132089	0.854031	162247	144133	-0.824775	1.0777e-09	159528	101122	-1.25245	0.0116574	149828	83181	-0.304323	0.51688	336081	319979	orf19.1154 (EGD1)	EGD1	Subunit beta1 of the nascent polypeptide-associated complex (NAC) involved in protein targeting, associated with cytoplasmic ribosomes; enhances DNA binding of the Gal4p activator; homolog of human BTF3b
CPAR2_105300		0.113823	0.777987	32006	33716	-0.076526	0.82681	22419	23741	-1.25196	0.00205512	20781	11588	0.165647	0.68252	9143	11899	orf19.5197 (APE2)	APE2	Aminopeptidase yscII; may have a role in obtaining leucine from dipeptide substrates; sequence coordinates have changed since RT-PCR analysis showed that the adjacent ORF YKL158W comprises the 5' exon of APE2/YKL157W
CPAR2_404230		0.457595	0.0710386	1002	1342	1.25091	1.20485e-09	1412	3742	0.0198565	0.970807	1216	1640	0.00669752	0.992281	1227	1440	orf19.7440 (HST6)	STE6	Plasma membrane ATP-binding cassette (ABC) transporter required for the export of a-factor, catalyzes ATP hydrolysis coupled to a-factor transport; contains 12 transmembrane domains and two ATP binding domains; expressed only in MATa cells
CPAR2_502440		0.203271	0.513236	1997	2237	0.133892	0.71762	1693	2070	1.24969	0.0274596	1892	6167	-0.24855	0.655507	4890	4839	orf19.3990	RPC17	RNA polymerase III subunit C17; physically interacts with C31, C11, and TFIIIB70; may be involved in the recruitment of pol III by the preinitiation complex
CPAR2_704100		0.0953899	0.992929	3283	3408	-0.300518	0.231508	4721	4258	-1.24839	9.20665e-05	4521	2545	-0.173193	0.765875	1596	1679	orf19.5129
CPAR2_109830		0.237377	0.518645	5408	6214	0.0420874	0.928207	5644	6480	1.24753	0.0190821	4876	16055	0.188472	0.825119	8747	11308	orf19.3304	RRP40	Exosome non-catalytic core component; involved in 3'-5' RNA processing and degradation in both the nucleus and the cytoplasm; predicted to contain both S1 and KH RNA binding domains; has similarity to human hRrp40p (EXOSC3)
CPAR2_701340		-0.0840271	0.993547	12166	11227	-0.0353266	0.95523	5401	5891	1.24632	0.00606272	4339	14051	-0.178626	0.705535	8206	8442	orf19.7332 (ELF1)	NEW1	ATP binding cassette protein that cosediments with polysomes and is required for biogenesis of the small ribosomal subunit; Asn/Gln-rich rich region supports [NU+] prion formation and susceptibility to [PSI+] prion induction
CPAR2_404380		-0.0585028	0.99366	9411	8860	-0.548563	0.000123761	12420	9479	-1.24616	0.0032924	10520	5991	0.0527491	0.882185	4675	5652	orf19.354	ICP55	Mitochondrial aminopeptidase; cleaves the N termini of at least 38 imported proteins after cleavage by the mitochondrial processing peptidase (MPP), thereby increasing their stability; member of the aminopeptidase P family
CPAR2_206110		-0.293627	0.466292	8912	7078	-0.20413	0.395801	9884	9652	-1.24539	1.27094e-05	11469	6500	-0.105677	0.779255	12032	12919	orf19.7443
CPAR2_503950		-0.061638	0.992929	1002	934	0.17389	0.785959	1211	1518	1.2451	0.000864239	950	2951	-0.136626	0.825119	1903	2034	No C.albicans ortholog
CPAR2_107870		-0.13447	0.99233	1632	1452	0.21148	0.742966	1478	1918	1.2448	0.00152609	1395	4397	-0.257536	0.65869	4449	4394	orf19.443	RPC25	RNA polymerase III subunit C25, required for transcription initiation; forms a heterodimer with Rpc17p; paralog of Rpb7p
CPAR2_209280		0.452045	0.405803	274	365	0.604075	0.24198	314	541	1.24441	0.00885948	343	1062	-0.176635	0.851979	600	640	orf19.822
CPAR2_303100		-0.128284	0.992929	88726	78826	0.0136484	0.975541	47738	54259	-1.24336	0.00500331	42949	23527	-0.239918	0.688792	38371	38035	No C.albicans ortholog
CPAR2_502270		0.300922	0.287913	2041	2449	1.17331	8.71271e-06	2425	6137	1.24335	0.00359115	1998	6450	-0.16446	0.695148	5592	5881	orf19.6879	SEN34	Subunit of the tRNA splicing endonuclease, which is composed of Sen2p, Sen15p, Sen34p, and Sen54p; Sen34p contains the active site for tRNA 3' splice site cleavage and has similarity to Sen2p and to Archaeal tRNA splicing endonuclease
CPAR2_400670		-0.2003	0.957956	8795	7443	-0.102613	0.791833	15234	15739	-1.24272	0.000406548	16114	9052	-0.0822522	0.904385	6829	7432	orf19.4580
CPAR2_110110		-0.102273	0.992929	52079	46966	-0.021213	0.96769	48514	54333	1.24211	0.0267395	56872	178375	0.00634668	0.992334	83758	98547	orf19.3294 (MBF1)	MBF1	Transcriptional coactivator that bridges the DNA-binding region of Gcn4p and TATA-binding protein Spt15p; suppressor of frameshift mutations
CPAR2_206550		0.055134	0.993547	8269	8339	-0.0499086	0.870235	6309	6841	-1.24083	0.00147099	5437	3021	0.148144	0.720788	4026	5155	orf19.3549 (CDC21)	CDC21	Thymidylate synthase, required for de novo biosynthesis of pyrimidine deoxyribonucleotides; expression is induced at G1/S
CPAR2_210870		0.184028	0.639894	19731	21795	-0.429588	0.00901932	16032	13353	-1.24	0.0144828	15437	8730	-0.168939	0.693037	16145	16873	orf19.1560 (POB3)	POB3	Subunit of the heterodimeric FACT complex (Spt16p-Pob3p), which associates with chromatin via interaction with Nhp6Ap and Nhp6Bp, and reorganizes nucleosomes to facilitate access to DNA by RNA and DNA polymerases
CPAR2_807010		-0.498655	0.00380754	4745	3266	-0.63244	0.0178079	4622	3337	-1.23986	0.000307688	4357	2435	-0.327288	0.560588	1284	1212	No C.albicans ortholog
CPAR2_300730		-0.751046	0.000588046	1685	974	-1.23939	2.65331e-07	1756	827	0.442981	0.287984	1183	2121	-0.308842	0.595215	1079	1027	orf19.6577 (FLU1)	TPO1	Polyamine transporter that recognizes spermine, putrescine, and spermidine; catalyzes uptake of polyamines at alkaline pH and excretion at acidic pH; phosphorylation enhances activity and sorting to the plasma membrane
CPAR2_801735		0.400826	0.881887	1109	1434	-0.362952	0.647256	1191	1046	-1.23895	0.00270318	1167	654	-0.161285	0.853652	3033	3116	orf19.4949
CPAR2_802250		0.28697	0.936804	19899	23714	-0.405352	0.0129014	55692	46893	1.23861	0.00247382	66508	207571	0.862654	0.0213265	13652	29414	orf19.2396 (IFR2)
CPAR2_403690		0.209912	0.741419	3431	3863	-0.0711156	0.885456	2932	3152	1.23778	0.0321709	2623	8425	-0.308535	0.526212	13407	12796	orf19.1304	RRP4	Exosome non-catalytic core component; involved in 3'-5' RNA processing and degradation in both the nucleus and the cytoplasm; predicted to contain RNA binding domains; has similarity to human hRrp4p (EXOSC2)
CPAR2_103330		0.148993	0.992929	1366	1485	-0.105682	0.881785	1389	1446	1.23521	0.00912791	1021	3338	0.852375	0.263344	831	1717	No C.albicans ortholog
CPAR2_103010		0.128795	0.992929	5014	5361	-0.135556	0.816117	4658	4775	1.23471	6.26761e-05	4105	12940	-0.434242	0.527734	13204	11555	orf19.1609	KRI1	Essential nucleolar protein required for 40S ribosome biogenesis; associate with snR30; physically and functionally interacts with Krr1p
CPAR2_807260		-0.510765	1.27436e-05	9330	6375	-1.23405	1.31753e-05	9638	4559	-0.715097	0.0793341	5718	4653	0.0742848	0.892199	2142	2641	orf19.7371 (ZCF35)
CPAR2_403770		0.172042	0.992929	7997	8713	-0.136148	0.755689	6718	6893	-1.23379	0.0108192	8023	4591	-0.0283741	0.964488	6002	6757	orf19.5043
CPAR2_703840		-0.286409	0.311788	6564	5247	-0.327748	0.123237	7109	6315	-1.23264	4.30103e-06	6891	3935	-0.0253566	0.962041	2696	3113	orf19.6698	SLM5	Mitochondrial asparaginyl-tRNA synthetase
CPAR2_206270		0.0104303	0.996266	33862	33201	0.0839016	0.764043	23104	27491	-1.23219	0.000164606	21668	12239	0.227203	0.634496	5664	7605	orf19.3278 (GSY1)	GSY1	Glycogen synthase with similarity to Gsy2p, the more highly expressed yeast homolog; expression induced by glucose limitation, nitrogen starvation, environmental stress, and entry into stationary phase
CPAR2_602660		0.0978473	0.992929	3723	3866	1.23091	4.91289e-09	2607	6884	0.0164859	0.976304	2932	3891	-0.137434	0.802004	2768	2982	orf19.3446	MOG1	Conserved nuclear protein that interacts with GTP-Gsp1p, which is a Ran homolog of the Ras GTPase family, and stimulates nucleotide release, involved in nuclear protein import, nucleotide release is inhibited by Yrb1p
CPAR2_407620		-0.130274	0.990848	2963	2631	0.273529	0.323081	2309	3138	1.23087	5.98477e-06	2183	7001	0.153956	0.825119	2744	3560	orf19.1735	CWC27	Component of a complex containing Cef1p, putatively involved in pre-mRNA splicing; has similarity to S. pombe Cwf27p
CPAR2_203920		-0.281536	0.788226	4519	3630	0.900088	1.52026e-05	5473	11386	-1.23071	0.00238413	4992	2900	0.158476	0.68252	1815	2364	orf19.1804	YDL119C	Putative mitochondrial transport protein; GFP-fusion protein is induced in response to the DNA-damaging agent MMS; the authentic, non-tagged protein is detected in purified mitochondria
CPAR2_209370		-0.395169	0.680545	831	614	-1.00774	0.000399088	1104	619	-1.22979	9.41723e-05	1141	658	-0.39547	0.588141	6014	5301	orf19.2310	RRT5	Putative protein of unknown function; non-essential gene identified in a screen for mutants with increased levels of rDNA transcription; expressed at high levels during sporulation
CPAR2_802560		0.347978	0.322696	4026	4984	1.22944	9.44635e-10	3207	8426	-0.578658	0.0861383	2987	2666	-0.101857	0.836005	2063	2246	orf19.2863
CPAR2_702070		-0.467161	0.0502556	2397	1690	-0.360541	0.175236	3601	3143	-1.22931	7.22438e-05	3492	2011	-0.106542	0.850719	1038	1127	orf19.612	AIM32	Putative protein of unknown function; null mutant is viable and displays elevated frequency of mitochondrial genome loss
CPAR2_601190		-0.0984807	0.992929	7657	6934	0.120458	0.787411	10996	13258	-1.22887	0.0100482	8388	4782	0.404691	0.424914	1595	2440	No C.albicans ortholog
CPAR2_701040		-0.100776	0.985725	7157	6496	0.576018	0.00206404	5116	8554	1.22874	0.0116025	4257	12975	0.327056	0.555494	2379	3510	orf19.5238
CPAR2_104490		-0.0356344	0.993547	2860	2721	-0.0601456	0.908682	3487	3749	1.22825	0.00072433	3107	9806	-0.0138681	0.967269	6809	7883	orf19.81	RRP46	Exosome non-catalytic core component; involved in 3'-5' RNA processing and degradation in both the nucleus and the cytoplasm; has similarity to E. coli RNase PH and to human hRrp46p (EXOSC5)
CPAR2_501920		0.162986	0.855172	2503	2726	0.0527671	0.899553	1128	1307	1.2281	0.000240906	865	2795	0.249127	0.749126	1243	1683	orf19.1942 (SGE1)
CPAR2_100270		-0.000160389	0.999931	376	367	-0.138376	0.829164	427	437	1.22734	0.000212161	451	1395	-0.555564	0.588141	451	370	orf19.4017
CPAR2_700450		0.706249	0.000381036	16628	26397	0.0904393	0.854396	15571	18610	1.22728	0.000440988	13635	44068	-0.23103	0.787048	10351	10023	orf19.7247 (RIM101)	RIM101	Transcriptional repressor involved in response to pH and in cell wall construction; required for alkaline pH-stimulated haploid invasive growth and sporulation; activated by proteolytic processing; similar to A. nidulans PacC
CPAR2_806510		0.0960124	0.992929	37863	39496	-0.062266	0.897961	126504	136971	-1.2268	0.0162387	161701	91743	-0.468501	0.419295	123468	104756	orf19.216.1
CPAR2_602370		-0.248392	0.155002	2487	2038	0.374928	0.0769993	4106	5958	1.22632	2.98794e-05	3765	11737	0.0977472	0.825119	2753	3435	orf19.3407	RAD18	E3 ubiquitin ligase; forms heterodimer with Rad6p to monoubiquitinate PCNA-K164; heterodimer binds single-stranded DNA and has single-stranded DNA dependent ATPase activity; required for postreplication repair
CPAR2_805500		0.172542	0.652629	14532	15938	0.614895	0.00148093	10211	17486	1.22596	7.38131e-07	8607	27343	0.119117	0.81089	13273	16646	orf19.7081 (SPL1)	NFS1	Cysteine desulfurase involved in iron-sulfur cluster (Fe/S) biogenesis and in thio-modification of mitochondrial and cytoplasmic tRNAs; essential protein located predominantly in mitochondria
CPAR2_109790		0.0663984	0.992929	1968	2009	-0.190204	0.709283	1649	1621	1.22584	0.019827	1704	5577	-0.214176	0.667603	3274	3315	orf19.3305 (ZCF17)
CPAR2_211740		0.121967	0.992929	19793	21101	0.08456	0.795561	20852	24889	1.22456	0.0222343	13751	44580	0.549868	0.119364	5602	9454	orf19.909 (STP4)	STP3	Zinc-finger protein of unknown function, possibly involved in pre-tRNA splicing and in uptake of branched-chain amino acids
CPAR2_704150		-0.108055	0.992929	19130	17302	-0.0572888	0.893772	26105	27936	-1.22431	0.0384282	22590	12345	0.0937939	0.844306	2716	3383	orf19.5136	YGR017W	Putative protein of unknown function; green fluorescent protein (GFP)-fusion protein localizes to both the nucleus and the cytoplasm
CPAR2_603120		-0.421127	0.255571	3649	2658	-0.161292	0.652897	5446	5454	-1.22369	0.00114959	4730	2791	0.295159	0.64349	1240	1743	orf19.91	YGR053C	Putative protein of unknown function
CPAR2_800230		0.111718	0.992929	3671	3870	-0.164888	0.664386	6880	6844	-1.22315	0.00936414	5622	3285	0.455362	0.604649	705	1104	No C.albicans ortholog
CPAR2_213620		-0.242646	0.682272	10587	8723	-0.325037	0.200356	10246	9087	-1.22232	3.01324e-06	8470	4886	-0.165005	0.69509	6442	6740	orf19.2116 (NAT2)	NAT2	Protein with an apparent role in acetylation of N-terminal methionine residues
CPAR2_212980		0.0775568	0.992929	4746	4895	0.527878	0.0143564	4034	6509	1.22215	0.000288125	3032	9627	0.0809417	0.860215	4808	5862	orf19.2045	DGK1	Diacylglycerol kinase, localized to the endoplasmic reticulum (ER); overproduction induces enlargement of ER-like membrane structures and suppresses a temperature-sensitive sly1 mutation; contains a CTP transferase domain
CPAR2_202330		-0.333456	0.575399	10400	8054	-0.727013	6.56975e-07	7902	5371	-1.22091	0.0284582	7629	4454	-0.0208909	0.956629	8180	9310	orf19.484 (MRPL40)	MRPL40	Mitochondrial ribosomal protein of the large subunit
CPAR2_101300		0.205333	0.839183	3325	3730	1.22058	2.70156e-07	3646	9568	0.450523	0.388751	3948	7047	-0.00732321	0.992281	1222	1421	orf19.4286
CPAR2_406640		-0.329637	0.842898	13308	10348	-0.881455	9.6642e-08	12976	7897	-1.21795	0.0424375	11582	6687	0.00104169	0.997466	14689	17076	orf19.2259	MRPL50	Mitochondrial ribosomal protein of the large subunit, not essential for mitochondrial translation
CPAR2_103230		0.039711	0.992929	17208	17190	-0.146328	0.612893	15095	15274	-1.21696	2.95271e-05	14098	8030	-0.136152	0.801556	22664	23989	orf19.316 (SEC13)	SEC13	Structural component of three distinct complexes; subunit of the Nup84 nuclear pore sub-complex (NPC), the COPII vesicle coat, and the Seh1-associated (SEA) complex; the COPII vesicle coat is required for vesicle formation in ER to Golgi transport; the Nup84 subcomplex contributes to nucleocytoplasmic transport, NPC biogenesis and processes that may require localization of genes or chromosomes at…
CPAR2_108060		0.0700728	0.993547	175	179	0.767623	0.279509	119	229	1.21508	0.0129191	100	322	-0.240628	0.81089	170	167	orf19.4063 (GPT1)
CPAR2_800240		0.415055	0.881887	249	324	-1.21372	9.73758e-05	527	253	0.45406	0.533569	434	766	0.0714093	0.928276	502	605	orf19.3746 (IFC1)
CPAR2_400620		-0.182769	0.597502	24315	20857	0.0379767	0.926746	19165	21849	-1.213	4.97806e-05	16747	9692	-0.160523	0.825119	25472	25898	orf19.4579	ERV29	Protein localized to COPII-coated vesicles, involved in vesicle formation and incorporation of specific secretory cargo
CPAR2_501590		0.247121	0.882291	8352	9618	-0.166031	0.54381	7700	7764	1.21291	0.0288762	8090	23967	-0.236955	0.672746	13136	13101	orf19.4136 (YBL053)	TOF1	Subunit of a replication-pausing checkpoint complex (Tof1p-Mrc1p-Csm3p) that acts at the stalled replication fork to promote sister chromatid cohesion after DNA damage, facilitating gap repair of damaged DNA; interacts with the MCM helicase
CPAR2_100920		0.144971	0.992929	4558	4937	-1.21276	1.52285e-08	6832	3282	-0.803066	0.0723912	5275	4006	-0.0331607	0.95458	1364	1565	orf19.3921	FSH3	Putative serine hydrolase; likely target of Cyc8p-Tup1p-Rfx1p transcriptional regulation; sequence is similar to S. cerevisiae Fsh1p and Fsh2p and the human candidate tumor suppressor OVCA2
CPAR2_207920		-0.146371	0.985725	6008	5269	-0.478477	0.0767779	4457	3564	-1.21009	0.0118618	4611	2692	-0.170153	0.693289	7159	7495	orf19.666	LCD1	Essential protein required for the DNA integrity checkpoint pathways; interacts physically with Mec1p; putative homolog of S. pombe Rad26 and human ATRIP
CPAR2_801110		0.469966	0.754758	665	896	0.0681469	0.894874	745	874	1.20842	0.0128697	600	1827	0.0471767	0.930466	881	1056	No C.albicans ortholog
CPAR2_700660		-0.490862	0.836714	135373	94382	-1.19721	0.000301153	105852	51747	-1.20811	0.11258	94273	54152	-0.319295	0.64349	114331	108155	orf19.7217 (RPL4B)	RPL4B	Protein component of the large (60S) ribosomal subunit, nearly identical to Rpl4Ap and has similarity to E. coli L4 and rat L4 ribosomal proteins
CPAR2_104760		-0.100186	0.992929	16780	15199	-0.56973	0.00760163	20973	15992	-1.20772	0.00299834	23104	13535	-0.110454	0.836185	16858	17955	orf19.5486.1 (SMD2)	SMD2	Core Sm protein Sm D2; part of heteroheptameric complex (with Smb1p, Smd1p, Smd3p, Sme1p, Smx3p, and Smx2p) that is part of the spliceosomal U1, U2, U4, and U5 snRNPs; homolog of human Sm D2
CPAR2_601140		-0.444323	0.645965	3433	2466	-0.581808	0.00692248	6224	4670	-1.20681	0.0047341	6860	3882	-0.196791	0.728436	1777	1826	orf19.5607
CPAR2_502240		0.135439	0.932877	7630	8150	-0.286327	0.326675	7724	7093	-1.20668	0.0103941	7326	4239	-0.130027	0.780195	7937	8485	orf19.3211 (RCF3)	RFC3	Subunit of heteropentameric Replication factor C (RF-C), which is a DNA binding protein and ATPase that acts as a clamp loader of the proliferating cell nuclear antigen (PCNA) processivity factor for DNA polymerases delta and epsilon
CPAR2_700470		-0.102998	0.992929	6400	5785	0.110008	0.758201	6328	7616	-1.2052	0.00186527	5581	3213	-0.0346912	0.951968	1738	2010	orf19.7244	FMP41	Putative protein of unknown function; GFP-fusion protein is induced in response to the DNA-damaging agent MMS; the authentic, non-tagged protein is detected in highly purified mitochondria in high-throughput studies
CPAR2_503820		0.0127486	0.999	2409	2377	-0.582344	0.00222186	4837	3632	-1.20482	0.0116025	5323	2978	-0.21769	0.634496	3289	3304	orf19.5394.1	PET191	Protein required for assembly of cytochrome c oxidase; exists as an oligomer that is integral to the mitochondrial inner membrane and faces the intermembrane space; contains a twin Cx9C motif
CPAR2_106620		-0.362863	0.864486	5862	4462	-1.20418	6.52931e-07	9512	4556	-0.74651	0.0384741	5530	4407	-0.322129	0.329707	2909	2705	orf19.2952 (EXG2)	EXG2	Exo-1,3-beta-glucanase, involved in cell wall beta-glucan assembly; may be anchored to the plasma membrane via a glycosylphosphatidylinositol (GPI) anchor
CPAR2_404780		0.671683	0.255571	4900	7624	0.33953	0.240551	4663	6610	1.2041	0.00273807	3553	11532	0.414684	0.621562	10657	16107	No C.albicans ortholog
CPAR2_806270		0.521895	0.074282	449	628	-0.481641	0.322976	707	560	-1.20357	0.0280485	462	270	0.657505	0.724502	89	160	orf19.1406	REV7	Accessory subunit of DNA polymerase zeta, involved in translesion synthesis during post-replication repair; required for mutagenesis induced by DNA damage; involved in double-strand break repair
CPAR2_700100		0.198697	0.885609	5714	6400	1.20302	1.25253e-10	11934	31000	0.331598	0.654401	11899	19494	0.492256	0.462919	1782	2841	orf19.2157 (DAC1)
CPAR2_807120		0.303985	0.946281	167	201	1.20292	0.03646	184	470	0.787232	0.145989	202	490	-0.0969306	0.946077	179	189	No C.albicans ortholog
CPAR2_500760		0.0680011	0.992929	1290	1321	1.2029	5.62098e-10	1397	3603	0.749415	0.0427936	1152	2688	-0.0338577	0.943915	1603	1825	orf19.2898	BOR1	Boron efflux transporter of the plasma membrane; binds HCO3-, I-, Br-, NO3- and Cl-; has similarity to the characterized boron efflux transporter A. thaliana BOR1
CPAR2_704340		-0.0226428	0.998689	1128	1085	0.386198	0.150495	1299	1892	1.2027	0.00160492	1035	3248	-0.0260482	0.965115	793	907	No C.albicans ortholog
CPAR2_103410		-0.298189	0.952522	36321	28587	-0.617357	0.00521945	48224	35155	-1.20258	0.00354667	51436	29822	-0.339007	0.624553	49140	45450	orf19.337	VTI1	Protein involved in cis-Golgi membrane traffic; v-SNARE that interacts with two t-SNARES, Sed5p and Pep12p; required for multiple vacuolar sorting pathways
CPAR2_102810		-0.0864628	0.992929	14616	13382	-0.316245	0.153163	23705	21291	-1.20178	0.0466362	26971	15847	-0.351779	0.603751	29974	27862	orf19.240	PAM17	Constituent of the Translocase of the Inner Mitochondrial membrane (TIM23 complex); proposed alternatively to be a component of the import motor (PAM complex) or to interact with and modulate the core TIM23 complex
CPAR2_104780		-0.435554	0.660634	7437	5342	-0.61666	0.206069	12097	8632	-1.20162	1.58664e-05	9649	5610	0.167052	0.741214	3827	4921	orf19.5485 (MEC3)	MEC3	DNA damage and meiotic pachytene checkpoint protein; subunit of a heterotrimeric complex (Rad17p-Mec3p-Ddc1p) that forms a sliding clamp, loaded onto partial duplex DNA by a clamp loader complex; homolog of human and S. pombe Hus1
CPAR2_500160		0.302776	0.888314	9830	11756	-0.203459	0.452927	8040	7834	-1.2015	6.40183e-05	7679	4504	0.253077	0.664528	6604	9035	orf19.3093 (MSH2)	MSH2	Protein that forms heterodimers with Msh3p and Msh6p that bind to DNA mismatches to initiate the mismatch repair process; contains a Walker ATP-binding motif required for repair activity; Msh2p-Msh6p binds to and hydrolyzes ATP
CPAR2_403070		-0.512572	0.297745	4246	2905	-1.05812	4.51838e-07	3371	1816	-1.20148	0.136461	3276	1950	-0.513674	0.263344	10538	8750	orf19.3777	IMG2	Mitochondrial ribosomal protein of the large subunit
CPAR2_809060		0.539756	0.973098	102	143	1.19919	0.0156647	148	387	-0.164229	0.840371	483	607	0.224374	0.800808	294	402	No C.albicans ortholog
CPAR2_808580		-0.107185	0.99233	3955	3583	1.19798	1.14868e-14	4177	10749	-0.198829	0.620017	3906	4647	0.159699	0.79301	3883	5011	orf19.6822	DCN1	Scaffold-type E3 ligase required for cullin neddylation and ubiquitin ligase activation; contains a ubiquitin-binding domain (UBA) for ubiquitin and Nedd8 (Rub1p) interaction and a PONY domain involved in cullin binding and neddylation
CPAR2_600330		-0.20703	0.775773	30033	25318	-0.148383	0.601967	37047	37234	-1.19795	0.0116194	33076	18871	0.0611224	0.879388	22861	27718	orf19.1085	UBC1	Ubiquitin-conjugating enzyme that mediates selective degradation of short-lived and abnormal proteins; plays a role in vesicle biogenesis and ER-associated protein degradation (ERAD); component of the cellular stress response
CPAR2_406030		0.937642	0.182564	2402	4456	0.755619	2.31781e-05	1881	3568	1.19739	0.0389836	1577	4710	-0.261666	0.683007	2916	2863	orf19.1389	SGN1	Cytoplasmic RNA-binding protein, contains an RNA recognition motif (RRM); may have a role in mRNA translation, as suggested by genetic interactions with genes encoding proteins involved in translational initiation
CPAR2_109620		-0.689733	0.260029	6402	3875	-1.1961	6.87498e-10	4935	2409	-0.978794	0.160275	4318	2862	0.220168	0.604649	4218	5699	orf19.6086 (LEU4)	LEU4	Alpha-isopropylmalate synthase (2-isopropylmalate synthase); the main isozyme responsible for the first step in the leucine biosynthesis pathway
CPAR2_602750		0.294835	0.660634	7831	9329	1.19594	2.4665e-16	8678	22291	-0.0279942	0.94602	8568	11263	0.0800116	0.86122	3072	3805	orf19.137	CST26	Protein required for incorporation of stearic acid into phosphatidylinositol; affects chromosome stability when overexpressed
CPAR2_404520		0.208847	0.981379	13712	15373	-0.0373174	0.938041	18668	20558	-1.19487	0.00414913	19670	11590	-0.207251	0.672746	17797	17990	orf19.351	YPR153W	Putative protein of unknown function
CPAR2_800120		-0.129834	0.940126	581	517	0.338981	0.273139	595	847	1.19377	0.00368731	472	1440	0.278537	0.741214	512	711	No C.albicans ortholog
CPAR2_803280		-0.0327552	0.992929	1244	1184	0.383176	0.119536	1268	1863	1.19276	0.0136331	813	2451	-0.0607848	0.917171	774	870	No C.albicans ortholog
CPAR2_800510		0.222577	0.826376	743	843	0.99717	0.0710918	964	2178	1.19242	0.00903501	605	1887	0.29173	0.659059	1253	1812	orf19.7513 (ALK2)
CPAR2_502980		-0.584117	0.0020023	11295	7337	-0.797396	0.000461783	8410	5433	-1.19169	0.00262081	5867	3429	-0.521536	0.170494	13029	10744	orf19.5379 (ERG4)	ERG4	C-24(28) sterol reductase, catalyzes the final step in ergosterol biosynthesis; mutants are viable, but lack ergosterol
CPAR2_210400		0.402798	0.0992424	1950	2510	-0.179757	0.606634	2182	2163	1.19081	0.000257791	1780	5610	-0.475704	0.177146	9380	7895	orf19.1476	IME4	Probable mRNA N6-adenosine methyltransferase required for entry into meiosis; transcribed in diploid cells; haploids repress IME4 transcription via production of antisense IME4 transcripts; antisense transcription is repressed in diploids
CPAR2_205720		0.247463	0.945965	3047	3535	1.19076	4.63906e-08	4740	12088	0.0347442	0.971019	4818	6152	0.106588	0.799683	2376	2964	orf19.6422 (SSY5)	SSY5	Serine protease of SPS plasma membrane amino acid sensor system (Ssy1p-Ptr3p-Ssy5p); contains an inhibitory domain that dissociates in response to extracellular amino acids, freeing a catalytic domain to activate transcription factor Stp1p
CPAR2_202720		0.104962	0.988692	1608	1683	0.0677063	0.876913	1572	1831	1.19073	0.0356388	1346	4304	0.152524	0.822106	2779	3599	orf19.4962	RMP1	Subunit of RNase MRP, which processes pre-rRNA and has a role in cell cycle-regulated degradation of daughter cell-specific mRNAs; unlike most subunits, not shared between RNase MRP and nuclear RNase P
CPAR2_602530		-0.257022	0.958464	148929	121762	-0.786869	0.000442346	155487	101124	-1.1906	0.0448831	150464	88181	-0.2592	0.620615	246166	240694	orf19.3426 (ANB1)	HYP2	Translation elongation factor eIF-5A that may function in translation initiation; similar to and functionally redundant with Anb1p; structural homolog of bacterial EF-P; undergoes an essential hypusination modification
CPAR2_601350		-0.125375	0.992929	42409	37762	-0.18638	0.48439	40123	39361	-1.1905	0.000393023	41581	24041	-0.424754	0.411305	32099	28026	orf19.3462 (SAR1)	SAR1	GTPase, GTP-binding protein of the ARF family, component of COPII coat of vesicles; required for transport vesicle formation during ER to Golgi protein transport
CPAR2_500480		0.00107906	0.99935	4961	4843	0.918866	6.14809e-05	4452	9433	1.19029	0.00107016	3460	10606	0.131453	0.785845	4272	5376	orf19.1240	YPR117W	Putative protein of unknown function
CPAR2_808730		0.84275	0.0369548	6394	11135	0.473001	0.093065	2633	4085	1.19022	0.00260153	2477	7888	0.370487	0.54212	2645	3954	orf19.6805	YDR089W	Protein of unknown function; deletion confers resistance to nickel; contains an SPX domain, which is found in proteins involved in phosphate homeostasis
CPAR2_212610		0.0425145	0.994923	15942	15902	-0.277513	0.437051	31193	29262	-1.18969	0.0246466	39384	22768	-0.103309	0.866291	23490	25560	orf19.2343.1	VMA9	Vacuolar H+ ATPase subunit e of the V-ATPase V0 subcomplex; essential for vacuolar acidification; interacts with the V-ATPase assembly factor Vma21p in the ER; involved in V0 biogenesis
CPAR2_702200		-0.337723	0.0108244	11811	9093	0.0358335	0.940201	16167	18762	1.18911	0.0334433	14424	41681	0.105628	0.88004	5816	7365	orf19.6407	REH1	Cytoplasmic 60S subunit biogenesis factor, associates with pre-60S particles; similar to Rei1p and shares partially redundant function in cytoplasmic 60S subunit maturation; contains dispersed C2H2 zinc finger domains
CPAR2_503260		0.148538	0.982201	2426	2620	0.312986	0.126593	3330	4622	1.18864	0.00341385	2670	8096	0.173335	0.680463	2092	2744	No C.albicans ortholog
CPAR2_302610		-0.053156	0.993547	636	595	0.441249	0.0972219	626	950	1.18795	0.0025815	589	1806	0.351052	0.593265	421	622	orf19.1943
CPAR2_211560		0.357915	0.633518	21193	26374	0.568519	0.00351006	19284	32214	1.1845	0.000316144	19848	60994	0.304008	0.392339	5302	7610	orf19.882 (HSP78)	HSP78	Oligomeric mitochondrial matrix chaperone that cooperates with Ssc1p in mitochondrial thermotolerance after heat shock; able to prevent the aggregation of misfolded proteins as well as resolubilize protein aggregates
CPAR2_205490		0.0457763	0.994923	1578	1579	-0.143466	0.719363	1573	1606	-1.18427	0.0025808	1579	921	-0.13586	0.853652	1383	1483	orf19.1841
CPAR2_402950		0.0338746	0.993547	91678	91263	-0.0863826	0.825682	69043	73186	-1.18403	0.0157436	76837	45784	-0.473427	0.474415	77129	66534	orf19.5294 (PDB1)	PDB1	E1 beta subunit of the pyruvate dehydrogenase (PDH) complex, which is an evolutionarily-conserved multi-protein complex found in mitochondria
CPAR2_808640		-0.551284	0.00240712	8468	5633	-0.426347	0.0978126	8128	6715	-1.18381	0.00066658	5473	3227	-0.0609806	0.905844	2772	3069	No C.albicans ortholog
CPAR2_107220		-0.324062	0.82653	6318	4931	-0.303831	0.198871	5348	4853	-1.18279	0.000179426	5539	3279	0.130265	0.825119	2806	3558	orf19.4478	MSD1	Mitochondrial aspartyl-tRNA synthetase, required for acylation of aspartyl-tRNA; yeast and bacterial aspartyl-, asparaginyl-, and lysyl-tRNA synthetases contain regions with high sequence similarity, suggesting a common ancestral gene
CPAR2_300750		-0.321388	0.308541	1121	874	0.0391166	0.941634	1173	1349	1.18246	9.16118e-05	862	2617	0.327488	0.642236	658	941	No C.albicans ortholog
CPAR2_406060		-0.0144948	0.996266	9080	8740	-0.18764	0.536242	7911	7723	-1.18096	3.90741e-06	6578	3941	0.206456	0.708441	3305	4374	orf19.1392	EPS1	ER protein with chaperone and co-chaperone activity, involved in retention of resident ER proteins; has a role in recognizing proteins targeted for ER-associated degradation (ERAD), member of the protein disulfide isomerase family
CPAR2_300380		-0.0411741	0.993547	6449	6125	-0.186654	0.499976	9634	9457	1.18005	7.13931e-05	7941	23780	0.038902	0.916126	10129	12046	orf19.6903	RPC37	RNA polymerase III subunit C37
CPAR2_107210		-0.0382381	0.993547	4334	4124	-0.532669	0.215814	2755	2153	1.1796	0.0386522	2439	7578	-0.0420478	0.938244	7546	8452	orf19.4479	NOP9	Essential subunit of U3-containing 90S preribosome involved in production of 18S rRNA and assembly of small ribosomal subunit; also part of pre-40S ribosome and required for its export into cytoplasm; binds RNA and contains pumilio domain
CPAR2_804510		-0.0378329	0.994923	7917	7473	-0.719926	0.000352162	7919	5387	-1.17959	4.36546e-06	6721	3968	-0.266536	0.604649	8543	8385	orf19.1137	CDC8	Thymidylate and uridylate kinase, functions in de novo biosynthesis of pyrimidine deoxyribonucleotides; converts dTMP to dTDP and dUMP to dUTP; essential for mitotic and meiotic DNA replication; homologous to S. pombe Tmp1p
CPAR2_101540		0.0414652	0.993547	606	608	0.378069	0.283719	710	1024	1.17815	0.0105962	723	2229	-0.098415	0.872161	779	860	No C.albicans ortholog
CPAR2_104980		0.177955	0.987174	9400	10399	0.223663	0.466866	12198	16030	-1.17769	0.000578416	11075	6467	-0.117699	0.835482	10452	11305	orf19.2202
CPAR2_108650		-0.460443	0.517356	15621	11091	-0.737433	0.000235437	14127	9480	-1.17589	0.00256232	12810	7663	0.0749577	0.860215	10715	13111	orf19.3022	RSM24	Mitochondrial ribosomal protein of the small subunit
CPAR2_211300		-0.309655	0.910599	6568	5137	-0.774888	2.95236e-07	7020	4574	-1.17563	0.00192413	6638	3906	-0.369742	0.604649	12455	11378	orf19.836.1	SMX2	Core Sm protein Sm G; part of heteroheptameric complex (with Smb1p, Smd1p, Smd2p, Smd3p, Sme1p, and Smx3p) that is part of the spliceosomal U1, U2, U4, and U5 snRNPs; homolog of human Sm G
CPAR2_807340		-0.200627	0.639132	13345	11291	-0.415147	0.128924	11205	9429	-1.17559	7.47108e-06	10876	6578	0.172547	0.747676	6419	8396	orf19.6966	CKI1	Choline kinase, catalyzing the first step in phosphatidylcholine synthesis via the CDP-choline (Kennedy pathway); exhibits some ethanolamine kinase activity contributing to phosphatidylethanolamine synthesis via the CDP-ethanolamine pathway
CPAR2_603610		-0.17465	0.99233	10978	9504	-0.0802901	0.830074	13443	14187	-1.17508	0.000180294	15113	9170	0.0546679	0.904322	4546	5459	orf19.4210	CLD1	Mitochondrial cardiolipin-specific phospholipase; functions upstream of Taz1p to generate monolyso-cardiolipin; transcription increases upon genotoxic stress; involved in restricting Ty1 transposition; has homology to mammalian CGI-58
CPAR2_211080		-0.0969417	0.993547	25044	22952	-0.306949	0.0409417	37318	33836	1.17492	0.026452	26856	77802	0.608682	0.0967706	9074	16050	orf19.797 (BAT21)	BAT2	Cytosolic branched-chain amino acid (BCAA) aminotransferase, preferentially involved in BCAA catabolism; homolog of murine ECA39; highly expressed during stationary phase and repressed during logarithmic phase
CPAR2_303680		-0.265263	0.921762	6791	5525	-0.528027	0.00232922	8513	6610	-1.17473	0.000438247	7481	4435	-0.0795948	0.860215	4404	4898	orf19.6295 (MAS2)	MAS2	Larger subunit of the mitochondrial processing protease (MPP), essential processing enzyme that cleaves the N-terminal targeting sequences from mitochondrially imported proteins
CPAR2_405480		0.305814	0.371258	4962	5969	1.1742	1.88299e-07	5381	13575	0.492849	0.166693	5004	9439	-0.153426	0.773533	5526	5763	orf19.5974 (ATG9)	ATG9	Transmembrane protein involved in forming Cvt and autophagic vesicles; cycles between the phagophore assembly site (PAS) and other cytosolic punctate structures, not found in autophagosomes; may be involved in membrane delivery to the PAS
CPAR2_703420		0.108714	0.992929	4371	4562	1.17317	7.35028e-06	2211	5592	0.977526	0.0077317	1880	5048	0.157893	0.77032	1250	1614	orf19.6530
CPAR2_401290		0.00152964	0.99935	3082	3007	0.200422	0.754487	1306	1682	1.17195	0.0246507	1047	3369	0.326085	0.593265	2083	3019	orf19.4590 (RFX2)
CPAR2_100050		-0.241093	0.81699	39865	32879	-0.39179	0.0230227	33392	28475	-1.17174	0.00179907	31995	18884	-0.069582	0.845933	19369	21447	orf19.4051 (HTS1)	HTS1	Cytoplasmic and mitochondrial histidine tRNA synthetase; efficient mitochondrial localization requires both a presequence and an amino-terminal sequence; mutations in human ortholog HARS2 are associated with Perrault syndrome
CPAR2_101510		0.588141	2.21855e-07	2160	3160	0.262131	0.309554	1778	2376	1.16998	0.0205293	1805	5662	-0.580334	0.00699827	2717	2125	orf19.3984	YGR237C	Putative protein of unknown function; green fluorescent protein (GFP)-fusion protein localizes to the cytoplasm
CPAR2_205310		-0.465383	0.813059	20426	14308	-1.16915	8.00953e-13	17429	8698	-1.01001	0.220095	17959	12132	-0.400336	0.486854	84813	74136	orf19.6630	LCL2	Putative protein of unknown function; mutant is deficient in amounts of cell wall mannosylphosphate and has long chronological lifespan; genetic interactions suggest a role in ER-associated protein degradation (ERAD)
CPAR2_501600		0.0574087	0.992929	5561	5641	-0.418142	0.0216992	5962	4987	-1.16895	4.56288e-05	5109	3119	0.0115497	0.982994	1954	2291	orf19.4142	AVT2	Putative transporter, member of a family of seven S. cerevisiae genes (AVT1-7) related to vesicular GABA-glycine transporters
CPAR2_211900		-0.333031	0.938793	5851	4547	-0.995986	0.000982346	8756	4871	-1.1683	0.0499385	6769	3803	-0.131689	0.820397	3780	4081	orf19.889 (THI20)	THI20	Trifunctional enzyme of thiamine biosynthesis, degradation and salvage; has hydroxymethylpyrimidine (HMP) kinase, HMP-phosphate (HMP-P) kinase and thiaminase activities; member of a gene family with THI21 and THI22; HMP and HMP-P kinase activity redundant with Thi21p
CPAR2_101740		-0.0191205	0.998689	17657	16906	-0.00626398	0.988589	15676	17489	-1.16814	2.07442e-05	15153	9110	-0.048404	0.923714	3034	3398	orf19.6658
CPAR2_206670		0.0535548	0.992929	7669	7729	-0.492441	0.028734	7832	6268	-1.16797	0.0330756	8490	5136	-0.183086	0.693037	10484	10797	orf19.4442 (ALG9)	ALG9	Mannosyltransferase, involved in N-linked glycosylation; catalyzes both the transfer of seventh mannose residue on B-arm and ninth mannose residue on the C-arm from Dol-P-Man to lipid-linked oligosaccharides; mutation of the human ortholog causes type 1 congenital disorders of glycosylation
CPAR2_104700		0.11526	0.93737	2191	2311	1.16717	1.5641e-10	2070	5228	0.89214	0.00126836	2011	5050	0.278177	0.708008	1229	1731	orf19.5492	YHC1	Component of the U1 snRNP complex required for pre-mRNA splicing; putative ortholog of human U1C protein, which is involved in formation of a complex between U1 snRNP and the pre-mRNA 5' splice site
CPAR2_300020		-0.0713127	0.992929	300	278	1.12067	0.000537032	343	839	1.16662	0.0398575	416	1235	-0.0418262	0.949646	455	518	No C.albicans ortholog
CPAR2_211460		-0.517415	0.783801	14238	9744	-0.533664	0.0112791	13441	10400	-1.16516	0.0240728	12487	7536	-0.0226551	0.955739	11736	13536	orf19.863	MRPL35	Mitochondrial ribosomal protein of the large subunit
CPAR2_205660		0.0343685	0.993547	3422	3416	-0.0419044	0.942289	3100	3418	1.16514	0.0292702	3071	9271	-0.768489	0.257544	23380	16500	orf19.6369 (RIO2)	RIO2	Essential serine kinase involved in the processing of the 20S pre-rRNA into mature 18S rRNA; has similarity to Rio1p
CPAR2_701190		-0.0585538	0.993303	2536	2365	-0.30906	0.435354	3051	2814	1.16513	0.00507169	3068	9047	0.0509325	0.935207	1176	1429	orf19.7547	PIB1	RING-type ubiquitin ligase of the endosomal and vacuolar membranes, binds phosphatidylinositol(3)-phosphate; contains a FYVE finger domain
CPAR2_405760		0.312976	0.884303	4292	5213	0.341693	0.19351	3712	5275	1.16499	0.000590739	3271	10184	0.0288809	0.958595	5069	5962	orf19.6984
CPAR2_803840		0.0380096	0.99798	25799	25926	0.344071	0.174338	82327	117652	1.16497	0.000530574	93245	283414	0.118998	0.843642	33779	41774	No C.albicans ortholog
CPAR2_805000		-0.549974	0.77329	1994	1334	-1.16474	6.01094e-07	3672	1826	0.200794	0.733673	3226	5092	0.0727708	0.920951	3254	3953	orf19.4884 (WOR1)	MIT1	Transcriptional regulator of pseudohyphal growth; protein with sequence similarity to S. pombe gti1+ (gluconate transport inducer 1) and C. albicans Wor1
CPAR2_700760		-0.130054	0.992929	4615	4120	0.0861589	0.815618	2512	2989	1.16438	3.27923e-05	1875	5602	-0.194978	0.700872	2052	2098	orf19.5229	DIS3	Exosome core complex catalytic subunit; possesses both endonuclease and 3'-5' exonuclease activity; involved in 3'-5' RNA processing and degradation in both the nucleus and the cytoplasm; has similarity to E. coli RNase R and to human DIS3
CPAR2_803270		0.149489	0.968946	5137	5555	0.128079	0.817894	2717	3365	1.16412	0.0365643	2673	8258	-0.0719486	0.857092	8655	9537	orf19.2319	ESF1	Nucleolar protein involved in pre-rRNA processing; depletion causes severely decreased 18S rRNA levels
CPAR2_107260		0.0447322	0.992929	4103	4112	-0.315688	0.136429	3322	3009	1.16387	0.0392805	3255	9764	-0.100936	0.754237	13242	14368	orf19.1029	RPP1	Subunit of both RNase MRP and nuclear RNase P; RNase MRP cleaves pre-rRNA, while nuclear RNase P cleaves tRNA precursors to generate mature 5' ends and facilitates turnover of nuclear RNAs
CPAR2_206280		0.286621	0.0543053	4231	5025	1.1628	1.16895e-14	4661	11670	0.368544	0.2137	4199	7327	-0.29393	0.604324	6664	6440	orf19.3282 (BMT3)
CPAR2_800330		0.145979	0.992929	96	103	0.93717	0.229621	149	321	1.16252	0.0232208	115	345	-0.313078	0.682159	355	339	orf19.5879
CPAR2_100880		0.110437	0.959372	6488	6809	0.333811	0.173124	6442	9147	1.16233	0.000621162	6613	20302	-0.107949	0.754237	7525	8113	orf19.3928
CPAR2_212810		0.0558362	0.992929	50402	50959	0.301541	0.129876	42666	58627	-1.16219	6.29897e-05	37090	22102	0.0394264	0.921108	24662	29616	orf19.1591 (ERG10)	ERG10	Acetyl-CoA C-acetyltransferase (acetoacetyl-CoA thiolase), cytosolic enzyme that transfers an acetyl group from one acetyl-CoA molecule to another, forming acetoacetyl-CoA; involved in the first step in mevalonate biosynthesis
CPAR2_800130		-0.0751847	0.992929	1770	1639	1.16184	3.51104e-08	2475	6179	0.494395	0.0855817	2189	4134	-0.174244	0.722931	1938	2026	orf19.2851
CPAR2_106550		-0.0308882	0.993547	22493	21480	0.0595176	0.84826	18781	21987	1.16112	0.000799675	16270	47652	0.168925	0.616163	18631	24446	orf19.2960 (FRS2)	FRS2	Alpha subunit of cytoplasmic phenylalanyl-tRNA synthetase, forms a tetramer with Frs1p to form active enzyme; evolutionarily distant from mitochondrial phenylalanyl-tRNA synthetase based on protein sequence, but substrate binding is similar
CPAR2_212890		0.0217219	0.996266	7304	7199	-0.363572	0.160175	7037	6147	-1.16106	0.000201605	6420	3793	-0.398198	0.593265	10783	9806	orf19.2029 (RFC5)	RFC5	Subunit of heteropentameric Replication factor C (RF-C), which is a DNA binding protein and ATPase that acts as a clamp loader of the proliferating cell nuclear antigen (PCNA) processivity factor for DNA polymerases delta and epsilon
CPAR2_500530		-0.134714	0.747075	22902	20292	0.144068	0.594853	25900	32115	1.16077	0.0416955	23650	67565	0.0253835	0.966843	26743	32235	orf19.1236	GVP36	BAR domain-containing protein that localizes to both early and late Golgi vesicles; required for adaptation to varying nutrient concentrations, fluid-phase endocytosis, polarization of the actin cytoskeleton, and vacuole biogenesis
CPAR2_104630		0.156669	0.894045	564	612	0.604873	0.0308024	630	1072	1.16042	4.02462e-05	787	2382	-0.482986	0.192092	1677	1413	orf19.5499
CPAR2_807420		-0.216263	0.948941	116550	97977	-0.554648	0.0322253	105772	80799	-1.15998	0.0185114	103497	61967	0.063622	0.881027	121408	146756	orf19.5943.1	STM1	Protein required for optimal translation under nutrient stress; perturbs association of Yef3p with ribosomes; involved in TOR signaling; binds G4 quadruplex and purine motif triplex nucleic acid; helps maintain telomere structure
CPAR2_800030		0.167559	0.894045	19000	20735	-0.107272	0.804465	36644	38713	1.15946	0.0410803	39146	114106	0.180124	0.672746	28249	37311	orf19.7519
CPAR2_500280		0.519041	0.68232	21458	29835	-1.15939	0.000308688	20753	10331	-1.13245	0.0640535	17893	11849	0.010539	0.994623	4158	4766	orf19.1797
CPAR2_105790		0.00228343	0.999549	108767	105548	0.044597	0.910022	154150	177883	-1.15839	0.016966	194704	116410	-0.235907	0.749126	60620	60461	orf19.6059 (TTR1)	GRX2	Cytoplasmic glutaredoxin, thioltransferase, glutathione-dependent disulfide oxidoreductase involved in maintaining redox state of target proteins, also exhibits glutathione peroxidase activity, expression induced in response to stress
CPAR2_101530		0.0398782	0.993547	2805	2813	-0.071804	0.890873	1909	2029	1.15816	0.0384133	1334	4249	0.257452	0.793473	740	1000	orf19.3986 (PPR1)	PPR1	Zinc finger transcription factor containing a Zn(2)-Cys(6) binuclear cluster domain, positively regulates transcription of URA1, URA3, URA4, and URA10, which are involved in de novo pyrimidine biosynthesis, in response to pyrimidine starvation; activity may be modulated by interaction with Tup1p
CPAR2_104110		-0.158352	0.992929	22568	19588	-0.608476	0.0010704	28339	21008	-1.15786	0.00629405	32480	19376	-0.00316653	0.997466	22676	25795	orf19.3582	SEE1	Probable lysine methyltransferase involved in the dimethylation of eEF1A (Tef1p/Tef2p); sequence similarity to S-adenosylmethionine-dependent methyltransferases of the seven beta-strand family; role in vesicular transport
CPAR2_302130		0.301516	0.75492	185	222	0.113943	0.852703	397	484	1.15753	0.00240428	359	1060	-0.273451	0.708413	758	739	No C.albicans ortholog
CPAR2_104420		0.126289	0.928023	15586	16539	-0.163301	0.788683	13229	13213	-1.15631	0.0137268	12001	7196	0.160099	0.81089	6382	8151	orf19.2238 (LTE1)	LTE1	Protein similar to GDP/GTP exchange factors but without detectable GEF activity; required for asymmetric localization of Bfa1p at daughter-directed spindle pole bodies and for mitotic exit at low temperatures
CPAR2_204140		0.0740029	0.992929	616	632	-0.791631	0.0738527	593	379	-1.15614	0.00671216	455	285	-0.0143854	0.986464	425	484	orf19.5287
CPAR2_104130		0.0984082	0.993547	447032	462685	-0.237461	0.457222	329471	317269	-1.1559	0.0404648	393353	238481	0.132759	0.767685	291728	369314	orf19.3579 (ATP4)	ATP4	Subunit b of the stator stalk of mitochondrial F1F0 ATP synthase, which is a large, evolutionarily conserved enzyme complex required for ATP synthesis; contributes to the oligomerization of the complex; phosphorylated
CPAR2_108915		0.499704	0.368371	1252	1719	1.15526	3.93803e-08	566	1411	0.346358	0.495833	702	1225	-0.489383	0.330121	3383	2862	orf19.3064.1
CPAR2_601560		-0.0429098	0.998689	2970	2831	0.0219698	0.971607	2637	2996	1.15522	6.21165e-06	1949	5850	0.0754245	0.904385	2178	2664	orf19.2143	RTT10	WD40 domain-containing protein involved in endosomal recycling; forms a complex with Rrt2p that functions in the retromer-mediated pathway for recycling internalized cell-surface proteins; has a role in regulation of Ty1 transposition; human ortholog is WDR6
CPAR2_105050		-0.426965	0.474885	109116	79259	-0.433713	0.0582477	99911	82938	-1.15513	0.00010687	95863	57081	-0.0771173	0.836185	56987	63116	orf19.1896 (SSC1)	SSC1	Hsp70 family ATPase, constituent of the import motor component of the Translocase of the Inner Mitochondrial membrane (TIM23 complex); involved in protein translocation and folding; subunit of SceI endonuclease
CPAR2_204930		-0.0381427	0.993547	31396	29682	-0.0579525	0.866066	26234	28088	-1.15421	1.19585e-05	23571	14166	0.158681	0.734682	14663	18874	orf19.3873 (ARC40)	ARC40	Subunit of the ARP2/3 complex, which is required for the motility and integrity of cortical actin patches
CPAR2_106750		-0.0443274	0.992929	2755	2602	0.347553	0.0778525	2394	3406	1.1534	0.000154693	2008	6063	-0.0482637	0.917649	2534	2868	orf19.4535 (PTR3)	PTR3	Component of the SPS plasma membrane amino acid sensor system (Ssy1p-Ptr3p-Ssy5p), which senses external amino acid concentration and transmits intracellular signals that result in regulation of expression of amino acid permease genes
CPAR2_211000		-0.0716323	0.992929	43854	40534	0.0272165	0.927966	78406	89769	-1.15319	0.0063115	94456	55483	-0.152242	0.800808	32315	33831	orf19.806 (VMA7)	VMA7	Subunit F of the eight-subunit V1 peripheral membrane domain of vacuolar H+-ATPase (V-ATPase), an electrogenic proton pump found throughout the endomembrane system; required for the V1 domain to assemble onto the vacuolar membrane
CPAR2_104520		0.684334	0.162204	413	645	0.72789	0.0249606	482	900	1.15287	0.00145954	404	1230	-0.204495	0.709305	2352	2414	No C.albicans ortholog
CPAR2_800530		-0.546562	0.353766	66898	44687	1.15257	0.00346894	100178	247687	-0.849749	0.355319	91812	63207	0.658612	0.03581	12792	23527	orf19.7514 (PCK1)	PCK1	Phosphoenolpyruvate carboxykinase, key enzyme in gluconeogenesis, catalyzes early reaction in carbohydrate biosynthesis, glucose represses transcription and accelerates mRNA degradation, regulated by Mcm1p and Cat8p, located in the cytosol
CPAR2_205910		-0.0450706	0.993547	10955	10299	-0.274734	0.147723	6562	6076	-1.15225	0.0402807	7322	4487	-0.192169	0.593265	8850	9045	orf19.731 (EMP46)	EMP46	Integral membrane component of endoplasmic reticulum-derived COPII-coated vesicles, which function in ER to Golgi transport
CPAR2_404630		0.27911	0.899015	1518	1801	1.06876	1.14953e-05	1534	3596	1.15212	0.0693383	1454	4488	0.0751241	0.882185	2239	2749	orf19.7427	YML018C	Putative protein of unknown function; green fluorescent protein (GFP)-fusion protein localizes to the membrane of the vacuole; physical interaction with Atg27p suggests a possible role in autophagy; YML018C is not an essential gene
CPAR2_503550		0.252822	0.826733	29517	34188	-0.0582053	0.925007	21427	22741	-1.15165	3.50179e-06	19209	11599	0.0579756	0.88647	15684	18879	orf19.6938 (MEU1)	MEU1	Methylthioadenosine phosphorylase (MTAP), catalyzes the initial step in the methionine salvage pathway; affects polyamine biosynthesis through regulation of ornithine decarboxylase (Spe1p) activity; regulates ADH2 gene expression
CPAR2_501010		0.244313	0.958015	135	156	0.244036	0.78127	157	209	1.15159	0.0132178	140	418	0.463659	0.67086	101	160	orf19.2882 (XUT1)
CPAR2_101910		0.268231	0.958015	4508	5261	0.727341	3.52675e-06	3980	7365	1.14835	0.000780098	3844	11578	-0.064307	0.892199	5091	5728	orf19.1719 (SGA1)	SGA1	Intracellular sporulation-specific glucoamylase involved in glycogen degradation; induced during starvation of a/a diploids late in sporulation, but dispensable for sporulation
CPAR2_209680		0.321672	0.961296	562	680	-0.0257436	0.971735	542	601	1.14775	0.0127994	492	1519	-0.028496	0.960272	777	894	orf19.6956 (DAL9)
CPAR2_407040		-0.519284	0.323642	9491	6468	-0.403527	0.109055	12114	10228	-1.14703	0.00106703	10379	6178	-0.0103299	0.976931	5951	6855	orf19.4096	TAZ1	Lyso-phosphatidylcholine acyltransferase, required for normal phospholipid content of mitochondrial membranes; may remodel acyl groups of cardiolipin in the inner membrane; human ortholog tafazzin is implicated in Barth syndrome
CPAR2_500420		0.0144052	0.998689	5581	5502	-0.200567	0.645162	4643	4545	1.14655	0.0172021	3884	11926	0.103734	0.88726	10606	13008	orf19.1250	FAF1	Protein required for pre-rRNA processing and 40S ribosomal subunit assembly
CPAR2_700870		0.27155	0.921616	43551	50933	-0.499498	0.122049	55299	43847	-1.14477	0.000920593	38332	22770	-0.0932241	0.799008	40623	44379	orf19.4765 (PGA6)
CPAR2_803950		0.149166	0.968946	5815	6263	-0.319565	0.223735	4313	3855	-1.14464	0.00270156	3972	2464	0.226205	0.773533	2651	3518	orf19.4725 (SWI6)	SWI6	Transcription cofactor; forms complexes with Swi4p and Mbp1p to regulate transcription at the G1/S transition; involved in meiotic gene expression; also binds Stb1p to regulate transcription at START; cell wall stress induces phosphorylation by Mpk1p, which regulates Swi6p localization; required for the unfolded protein response, independently of its known transcriptional coactivators
CPAR2_600230		-0.138987	0.930863	730	646	0.199319	0.596205	786	1002	1.14424	0.000647783	625	1871	0.179061	0.81089	912	1185	orf19.5596	ASA1	Subunit of the ASTRA complex, involved in chromatin remodeling; telomere length regulator involved in the stability or biogenesis of PIKKs such as TORC1
CPAR2_803150		0.0959368	0.992929	253031	261943	-0.187735	0.543147	189718	185211	-1.14416	0.00681985	194619	116736	-0.116453	0.81089	241243	262071	orf19.3223 (ATP3)	ATP3	Gamma subunit of the F1 sector of mitochondrial F1F0 ATP synthase, which is a large, evolutionarily conserved enzyme complex required for ATP synthesis
CPAR2_807210		0.0027187	0.999	3762	3677	-0.0122771	0.983991	3031	3392	1.14296	0.00224944	2367	7124	0.075361	0.908304	5962	7245	orf19.7361	SEN54	Subunit of the tRNA splicing endonuclease, which is composed of Sen2p, Sen15p, Sen34p, and Sen54p
CPAR2_101560		-0.25014	0.643674	7583	6218	-0.194118	0.369215	8804	8581	-1.14258	0.000621696	8381	5048	-0.0476721	0.904806	4827	5423	orf19.3166	DOP1	Golgi-localized, leucine-zipper domain containing protein; involved in endosome to Golgi transport, organization of the ER, establishing cell polarity, and morphogenesis; detected in highly purified mitochondria in high-throughput studies
CPAR2_804300		-0.0221869	0.993547	29669	28462	0.420884	0.199626	15639	23387	-1.14244	0.015398	12070	7615	0.0326885	0.967269	16312	18876	orf19.4732 (SEC24)	SEC24	Component of the Sec23p-Sec24p heterodimer of the COPII vesicle coat, required for cargo selection during vesicle formation in ER to Golgi transport; homologous to Sfb2p and Sfb3p
CPAR2_107690		0.0575998	0.992929	2991	3028	0.210576	0.423429	2552	3299	1.14218	0.00865146	2167	6448	0.00581881	0.993314	1644	1929	orf19.419
CPAR2_403140		-0.0423513	0.992929	8758	8280	0.050907	0.93886	4596	5368	1.14004	0.022407	4296	12910	-0.0944044	0.772993	14719	15984	orf19.2631	IKI3	Subunit of Elongator complex, which is required for modification of wobble nucleosides in tRNA; maintains structural integrity of Elongator; homolog of human IKAP, mutations in which cause familial dysautonomia (FD)
CPAR2_403980		0.0256557	0.996334	30621	30208	-0.394621	0.121673	31182	26765	-1.13875	0.0499605	35466	21696	-0.403058	0.419295	93497	83368	orf19.4879.2 (NTF2)	NTF2	Nuclear envelope protein, interacts with GDP-bound Gsp1p and with proteins of the nuclear pore to transport Gsp1p into the nucleus where it is an essential player in nucleocytoplasmic transport
CPAR2_203570		-0.337293	0.374982	33692	25997	-0.327468	0.0884422	18579	16587	-1.13772	0.00529552	15102	9305	0.0407691	0.936678	20670	24452	orf19.5281	SCP160	Essential RNA-binding G protein effector of mating response pathway, mainly associated with nuclear envelope and ER, interacts in mRNA-dependent manner with translating ribosomes via multiple KH domains, similar to vertebrate vigilins
CPAR2_803790		0.135605	0.875545	4066	4353	1.13736	3.24715e-13	2813	6907	0.796852	0.00909021	2550	6019	0.188204	0.758671	4060	5305	orf19.7475 (PHO81)	PHO81	Cyclin-dependent kinase (CDK) inhibitor, regulates Pho80p-Pho85p and Pcl7p-Pho85p cyclin-CDK complexes in response to phosphate levels; inhibitory activity for Pho80p-Pho85p requires myo-D-inositol heptakisphosphate (IP7) generated by Vip1p
CPAR2_404810		0.111766	0.988023	17320	18185	-0.0852299	0.817894	16240	17111	-1.1373	0.00186816	16830	10169	-0.315479	0.624553	28854	27681	orf19.7421 (CYP5)	CPR5	Peptidyl-prolyl cis-trans isomerase (cyclophilin) of the endoplasmic reticulum, catalyzes the cis-trans isomerization of peptide bonds N-terminal to proline residues; transcriptionally induced in response to unfolded proteins in the ER
CPAR2_100560		-0.713412	0.00383129	9812	5835	-1.13544	5.37654e-05	6031	3068	0.702361	0.249838	4366	9031	-0.0438563	0.923714	3262	3721	orf19.4304 (GAP1)
CPAR2_702910		0.0876795	0.992929	1693	1755	0.488974	0.024946	1273	1998	1.1348	6.15445e-05	1098	3254	-0.0165488	0.973769	926	1059	orf19.7159	YMR185W	Putative protein of unknown function; conflicting evidence on whether null mutant is viable with elongated buds, or inviable
CPAR2_704320		-0.159295	0.992929	148	128	-0.23484	0.762679	252	240	-1.13464	0.0221256	312	191	-0.531891	0.672746	184	149	No C.albicans ortholog
CPAR2_102910		-0.308117	0.827986	4402	3476	-0.578058	0.00700515	5891	4382	-1.13443	0.0113136	5352	3342	0.0468061	0.912485	4077	4903	orf19.230	PET111	Mitochondrial translational activator specific for the COX2 mRNA; located in the mitochondrial inner membrane
CPAR2_808350		0.182952	0.992929	87	96	-0.335182	0.712327	256	227	1.13212	0.0492481	198	575	0.277043	0.82345	2594	3620	orf19.6487
CPAR2_601580		-0.14318	0.992929	3348	2960	-0.311259	0.376873	2434	2190	1.13181	0.00143208	1745	5147	0.492546	0.64664	1066	1680	orf19.2137
CPAR2_202450		0.213776	0.992929	2085	2385	-1.13155	0.00419308	2467	1259	-0.360172	0.707721	2984	3399	0.266842	0.799683	293	403	orf19.467
CPAR2_106350		0.145289	0.992929	9103	9763	-0.58084	0.0304747	7454	5593	-1.13121	9.81951e-05	6814	4262	0.123402	0.820397	5789	7331	orf19.3694
CPAR2_204520		-0.421016	0.533555	3807	2779	-0.170148	0.617583	3625	3594	-1.13092	0.0100482	3108	1922	0.0246247	0.965846	1896	2248	orf19.5845 (RNR3)
CPAR2_301000		-0.0270785	0.99798	435	414	1.13041	3.82909e-07	1301	3204	0.725051	0.249377	1551	3323	-0.144728	0.83276	1341	1437	No C.albicans ortholog
CPAR2_703590		0.110027	0.992929	1061	1108	0.475532	0.108306	1209	1868	1.13015	0.0374768	1021	2899	0.747731	0.154385	205	398	No C.albicans ortholog
CPAR2_303280		0.130309	0.972354	2251	2401	-0.110112	0.783179	3184	3311	1.1301	0.000450983	2456	7183	-0.116144	0.855875	3123	3344	orf19.1927 (SNM1)	SNM1	Subunit of RNase MRP, which cleaves pre-rRNA and has a role in cell cycle-regulated degradation of daughter cell-specific mRNAs; binds to the NME1 RNA subunit of RNase MRP
CPAR2_100970		0.415971	0.33211	11680	15142	1.12994	4.40353e-08	15099	37276	0.455677	0.510416	16572	29194	0.0943229	0.904322	2404	3066	orf19.3922	SDT1	Pyrimidine nucleotidase; overexpression suppresses the 6-AU sensitivity of transcription elongation factor S-II, as well as resistance to other pyrimidine derivatives
CPAR2_213440		0.250148	0.774826	4747	5485	1.12845	5.44593e-07	4379	10686	-0.0530391	0.920759	3914	5094	0.021943	0.963942	4082	4788	orf19.2097	RAD5	DNA helicase proposed to promote replication fork regression during postreplication repair by template switching; RING finger containing ubiquitin ligase; stimulates the synthesis of free and PCNA-bound polyubiquitin chains by Ubc13p-Mms2p
CPAR2_204540		-0.0894471	0.992929	5348	4914	-0.0192103	0.965109	4515	4990	1.12824	0.000683415	3584	10538	-0.218897	0.588141	9401	9494	orf19.5847	RET1	Second-largest subunit of RNA polymerase III, which is responsible for the transcription of tRNA and 5S RNA genes, and other low molecular weight RNAs
CPAR2_700410		-0.482745	0.00743131	7573	5272	-1.12815	1.21653e-06	7966	4039	-0.772721	0.038861	6342	5047	0.189816	0.838004	3269	4264	orf19.7254	AEP3	Protein that may facilitate use of unformylated tRNA-Met in mitochondrial translation initiation; localized to the matrix face of the mitochondrial inner membrane; stabilizes the bicistronic AAP1-ATP6 mRNA
CPAR2_213720		-0.0827862	0.99233	18951	17411	-0.123005	0.668451	22015	22568	-1.12786	0.00066892	19745	11917	-0.0281869	0.9534	4987	5721	orf19.1917
CPAR2_403560		-0.143899	0.841358	1232	1085	-0.0318697	0.961464	1250	1372	1.12674	0.000269793	1161	3427	-0.140063	0.838029	1984	2061	orf19.1318
CPAR2_100590		0.169203	0.944994	4761	5228	0.430925	0.113423	5410	8125	-1.1265	0.000290154	4946	3030	-0.0694525	0.875299	2174	2433	orf19.4306	MDE1	5'-methylthioribulose-1-phosphate dehydratase; acts in the methionine salvage pathway; potential Smt3p sumoylation substrate; expression downregulated by caspofungin and deletion mutant is caspofungin resistant
CPAR2_210960		0.935698	0.761269	29057	53594	1.0938	5.48245e-05	17039	41335	-1.12625	0.160376	33587	21596	-0.0103629	0.975693	9789	11324	orf19.539 (LAP3)	LAP3	Cysteine aminopeptidase with homocysteine-thiolactonase activity; protects cells against homocysteine toxicity; has bleomycin hydrolase activity in vitro; transcription is regulated by galactose via Gal4p; orthologous to human BLMH
CPAR2_500850		0.214391	0.227218	22503	25441	0.126539	0.695412	20332	24783	-1.12603	0.00640799	16441	9917	-0.0459266	0.917171	4879	5533	orf19.1290 (XKS1)	XKS1	Xylulokinase, converts D-xylulose and ATP to xylulose 5-phosphate and ADP; rate limiting step in fermentation of xylulose; required for xylose fermentation by recombinant S. cerevisiae strains
CPAR2_603530		-0.375625	0.772921	15668	11812	-1.12594	8.80743e-06	41010	20749	-0.51931	0.265228	25097	22738	0.0581951	0.917171	4518	5534	orf19.1193 (GNP1)	AGP1	Low-affinity amino acid permease with broad substrate range, involved in uptake of asparagine, glutamine, and other amino acids; expression is regulated by the SPS plasma membrane amino acid sensor system (Ssy1p-Ptr3p-Ssy5p)
CPAR2_702510		0.419671	0.769594	10041	13003	0.0201684	0.953783	8502	9658	1.12506	0.0150671	8392	24982	-0.170288	0.752335	16303	17136	orf19.6548 (ISU1)	ISU1	Conserved protein of the mitochondrial matrix, performs a scaffolding function during assembly of iron-sulfur clusters, interacts physically and functionally with yeast frataxin (Yfh1p); isu1 isu2 double mutant is inviable
CPAR2_802430		-0.123131	0.988023	5063	4535	-0.142181	0.660269	2963	3009	1.1247	0.0055338	2294	6674	0.204139	0.741214	4430	5828	orf19.3744	CEX1	Cytoplasmic component of the nuclear aminoacylation-dependent tRNA export pathway; interacts with nuclear pore component Nup116p; copurifies with tRNA export receptors Los1p and Msn5p, as well as eIF-1a and the RAN GTPase Gsp1p
CPAR2_803700		0.275051	0.807252	3107	3654	-1.12403	0.0292335	1849	969	0.451932	0.841343	2343	4570	-0.154493	0.825119	11807	12051	orf19.7488	IMP3	Component of the SSU processome, which is required for pre-18S rRNA processing, essential protein that interacts with Mpp10p and mediates interactions of Imp4p and Mpp10p with U3 snoRNA
CPAR2_404830		-0.487195	0.816474	38378	26474	-0.585418	0.0225555	35636	26737	-1.12363	0.0376731	42339	26871	-0.373739	0.53243	21162	18571	orf19.7419 (HNT2)	HNT2	Dinucleoside triphosphate hydrolase; has similarity to the tumor suppressor FHIT and belongs to the histidine triad (HIT) superfamily of nucleotide-binding proteins
CPAR2_201880		0.315874	0.849567	7700	9305	-0.0120021	0.983637	5330	5950	-1.12291	0.00905596	4734	2858	-0.058898	0.882185	6219	7025	orf19.3761 (CDC54)	MCM4	Essential helicase component of heterohexameric MCM2-7 complexes which bind pre-replication complexes on DNA and melt DNA prior to replication; forms an Mcm4p-6p-7p subcomplex; shows nuclear accumulation in G1; homolog of S. pombe Cdc21p
CPAR2_803620		-0.0719619	0.993547	23955	22061	-0.404418	0.0917463	35617	30145	-1.12242	0.00331693	39996	24911	0.00065523	0.997963	13371	15408	orf19.4825	FMC1	Mitochondrial matrix protein, required for assembly or stability at high temperature of the F1 sector of mitochondrial F1F0 ATP synthase; null mutant temperature sensitive growth on glycerol is suppressed by multicopy expression of Odc1p
CPAR2_600710		0.494746	0.357872	202	277	0.221783	0.806457	200	260	1.12106	0.0162572	111	324	0.0933523	0.946375	124	159	No C.albicans ortholog
CPAR2_300770		-0.223476	0.99233	23978	19866	-1.12102	0.0101802	8936	4506	0.985492	0.14354	6541	16813	1.1115	0.0472928	936	2434	orf19.7148 (TPO2)
CPAR2_400010		-0.0817645	0.992929	3682	3397	0.111817	0.785698	2786	3365	1.12007	0.00242567	2078	6188	0.257412	0.672746	3580	4879	orf19.4705	CCA1	ATP (CTP):tRNA-specific tRNA nucleotidyltransferase; different forms targeted to the nucleus, cytosol, and mitochondrion are generated via the use of multiple transcriptional and translational start sites
CPAR2_503440		0.121095	0.992929	341846	359702	-0.271934	0.315272	327114	300883	-1.11984	0.0339445	340858	210308	-0.141066	0.765098	365847	389610	orf19.5419 (ATP5)	ATP5	Subunit 5 of the stator stalk of mitochondrial F1F0 ATP synthase, which is an evolutionarily conserved enzyme complex required for ATP synthesis; homologous to bovine subunit OSCP (oligomycin sensitivity-conferring protein); phosphorylated
CPAR2_701780		0.214349	0.930863	645	727	-0.382032	0.294622	647	556	-1.11888	0.0290546	694	439	-0.192126	0.804604	316	324	orf19.596.2	DAD4	Essential subunit of the Dam1 complex (aka DASH complex), couples kinetochores to the force produced by MT depolymerization thereby aiding in chromosome segregation; is transferred to the kinetochore prior to mitosis
CPAR2_501000		0.0455379	0.992929	12786	12844	0.15638	0.737217	20988	25960	-1.11881	0.000641984	17331	11027	-0.276147	0.453108	9782	9369	orf19.2883 (CSO99)
CPAR2_602760		0.152808	0.74331	1920	2079	0.605856	0.000253561	2511	4287	1.11876	0.00465324	2382	7009	0.489486	0.53921	843	1353	orf19.136	QDR3	Multidrug transporter of the major facilitator superfamily, has a role in polyamine homeostasis; expression is upregulated under polyamine stress; required for resistance to quinidine, barban, cisplatin, and bleomycin
CPAR2_701710		-0.170342	0.992929	22894	19717	-0.300127	0.312634	21125	19448	-1.11856	0.00917031	25631	16135	-0.0664592	0.892199	7490	8234	orf19.6135
CPAR2_502430		-0.0389276	0.992929	4579	4337	0.408063	0.103981	4929	7378	1.11822	0.00092038	4859	14258	-0.578362	0.362719	13257	10570	orf19.3991	ROG1	Protein with putative serine active lipase domain
CPAR2_808450		-0.00247247	0.999	7687	7466	0.338843	0.111656	7384	10446	1.11719	0.0103833	5649	16239	0.126095	0.81158	7843	9837	orf19.7451 (FUN31)	PSK1	One of two (see also PSK2) PAS domain containing S/T protein kinases; coordinately regulates protein synthesis and carbohydrate metabolism and storage in response to a unknown metabolite that reflects nutritional status
CPAR2_104900		-0.229253	0.455497	26741	22212	-0.337978	0.174434	15557	13676	-1.11616	0.00108133	12524	7751	-0.0892699	0.825119	21640	23538	orf19.4109 (PMT4)	PMT4	Protein O-mannosyltransferase, transfers mannose residues from dolichyl phosphate-D-mannose to protein serine/threonine residues; appears to form homodimers in vivo and does not complex with other Pmt proteins; target for new antifungals
CPAR2_102430		0.0295987	0.998689	5199	5133	-1.11591	0.000212159	4012	2069	-0.419837	0.465839	3416	3510	0.0339678	0.946405	3619	4254	No C.albicans ortholog
[truncated: 169 more rows]

## Sheet: READ ME
Only genes with | logFC | >1 and adjusted P-value <0.05 in at last one DEG (AvsB) comparison are listed
Adjusted P-values <0.05 and | logFC | >1 are highlighted
[truncated: 10 more rows]
